# Supplementary material
Source: PubMed Central journal article supplement (PMC6804633)
Supplement: DB190130SupplementaryData.pdf [file DB190130SupplementaryData.pdf]

## SUPPLEMENTARY DATA

### ***CACNB2* is a novel susceptibility gene for diabetic retinopathy in type 1 diabetes**

Nadja Vuori<sup>1,2,3\*</sup>, Niina Sandholm<sup>1,2,3\*</sup>, Anmol Kumar<sup>1,2,3\*</sup>, Kustaa Hietala<sup>4,1</sup>, Anna Syreeni<sup>1,2,3</sup>, Carol Forsblom<sup>1,2,3</sup>, Kati Juuti-Uusitalo<sup>4</sup>, Heli Skottman<sup>4</sup>, Minako Imamura<sup>5,6,7</sup>, Shiro Maeda<sup>5,6,7</sup>, Paula A. Summanen<sup>8</sup>, Markku Lehto<sup>1,2,3</sup>, Per-Henrik Groop<sup>1,2,3,9</sup> on behalf of the FinnDiane Study

1. Folkhälsan Institute of Genetics, Folkhälsan Research Center, Helsinki, Finland,
2. Abdominal Center Nephrology, University of Helsinki and Helsinki University Hospital, Helsinki, Finland,
3. Research Program for Clinical and Molecular Metabolism, Faculty of Medicine, University of Helsinki, Finland,
4. Faculty of Medicine and Health Technology, Tampere University, Finland
5. Laboratory for Endocrinology, Metabolism and Kidney Diseases, RIKEN Center for Integrative Medical Sciences, Kanagawa, Japan
6. Department of Advanced Genomic and Laboratory Medicine, Graduate School of Medicine, University of the Ryukyus, Okinawa, Japan
7. Division of Clinical Laboratory and Blood Transfusion, University of the Ryukyus Hospital, Okinawa, Japan
8. Ophthalmology, University of Helsinki, Helsinki University Hospital, Helsinki, Finland,
9. Department of Diabetes, Central Clinical School, Monash University, Melbourne, Victoria, Australia.

\* These authors contributed equally to the work

#### **Corresponding author:**

Per-Henrik Groop

Folkhälsan Institute of Genetics, Folkhälsan Research Center,  
Biomedicum Helsinki, Haartmaninkatu 8, FIN – 00290 Helsinki, Finland

Telephone: +358-2941 25459 (office)

E-mail: per-henrik.groop@helsinki.fi

#### **Contents**

|                                                                                                                                                                                                                         |           |
|-------------------------------------------------------------------------------------------------------------------------------------------------------------------------------------------------------------------------|-----------|
| <b>Supplementary Table S1: Primers used in the sequencing of <i>CACNB2</i> exons 1–4 and R476C and S502L mutation area .....</b>                                                                                        | <b>2</b>  |
| <b>Supplementary Table S2. Singlepoint linkage study results.....</b>                                                                                                                                                   | <b>3</b>  |
| <b>Supplementary Table S3. Summary statistics from the <i>CACNB2</i> candidate gene association study for all variants with MAF≥0.1%, imputation <math>r^2</math>≥0.6, and within 100kb of <i>CACNB2</i> gene .....</b> | <b>11</b> |
| <b>Supplementary Table S4. Association between <i>CACNB2</i> R476C, S502L, and related phenotypes. ....</b>                                                                                                             | <b>49</b> |
| <b>Supplementary Table S5: Physicians and nurses at health care centres participating in the collection of FinnDiane patients .....</b>                                                                                 | <b>50</b> |

SUPPLEMENTARY DATA

**Supplementary Table S1: Primers used in the sequencing of CACNB2 exons 1–4 and R476C and S502L mutation area**

| Primer name    | Exon amplified | Primer sequence (5'→3')        | Amplicon | PCR product length, nt |
|----------------|----------------|--------------------------------|----------|------------------------|
| CACNB2_RC_SL_F | 14             | TTTGGATCCTCTGCTTGAATGCACTTGCTC | F-R      | 507                    |
| CACNB2_RC_SL_R | 14             | TTTGAATTCTCCTTTTCACAGTAGCGATCC |          |                        |
| CACNB2_ex1F    | 1a, 1b         | TTTGGATCCTTCGCTCCGAGCCGACTTTTC | F-R      | 806                    |
| CACNB2_ex1F2   | 1a, 1b         | TTTGGATCCTGGCTCTGCCTCGGCTTC    | F2-R     | 483 (fragment start)   |
| CACNB2_ex1R    | 1a, 1b         | TTTGAATTCTGTCCCCAGCTCACTCGCTTG |          |                        |
| CACNB2_ex1R2   | 1a, 1b         | TTTGAATTCTGGGAGAAGTCTGGGAGGAC  | F-R2     | 422 (fragment end)     |
| CACNB2_ex2F    | 2              | TTTGGATCCCACCAGTATTAACCTTCTA   | F-R      | 678                    |
| CACNB2_ex2R    | 2              | TTTGAATTCTAGTTTTCAATGCAAGCCC   |          |                        |
| CACNB2_ex3F    | 3              | TTTGGATCCTCTGTGTTAGCAATACTTAC  | F-R      | 556                    |
| CACNB2_ex3R    | 3              | TTTGAATTCTCAGAATCTCCTATACCTC   |          |                        |
| CACNB2_ex4F    | 4              | TTTGGATCCTGTCTTCCAAGCCAGCTGAC  | F-R      | 528                    |
| CACNB2_ex4R    | 4              | TTTGAATTCCTGTGAATGGCAACATTTC   |          |                        |

SUPPLEMENTARY DATA

Supplementary Table S2. Singlepoint linkage study results

| Marker   | Pairs | Estimate | SE    | T-value | Nom_P-value | Emp_P-value | Replicates | RSS    | LOD   |
|----------|-------|----------|-------|---------|-------------|-------------|------------|--------|-------|
| D10S548  | 167   | 0.380    | 0.072 | 5.281   | 2.00E-07    | 1.97E-04    | 492883     | 11.265 | 2.728 |
| D19S418  | 155   | 0.169    | 0.068 | 2.489   | 6.94E-03    | 5.80E-03    | 16563      | 7.473  | 1.384 |
| D1S498   | 163   | 0.163    | 0.055 | 2.944   | 1.86E-03    | 7.44E-03    | 12903      | 7.968  | 1.288 |
| D11S935  | 173   | 0.242    | 0.067 | 3.593   | 2.13E-04    | 0.01        | 7983       | 12.385 | 1.109 |
| D1S2868  | 165   | 0.248    | 0.076 | 3.253   | 6.94E-04    | 0.01        | 7270       | 11.224 | 1.074 |
| D21S263  | 139   | 0.145    | 0.064 | 2.264   | 0.01        | 0.01        | 6741       | 6.672  | 1.046 |
| D10S189  | 162   | 0.264    | 0.075 | 3.510   | 2.91E-04    | 0.01        | 6583       | 8.979  | 1.037 |
| D9S288   | 169   | 0.152    | 0.055 | 2.766   | 3.15E-03    | 0.01        | 6526       | 8.405  | 1.034 |
| D9S158   | 150   | 0.168    | 0.069 | 2.443   | 7.87E-03    | 0.02        | 4951       | 7.195  | 0.931 |
| D4S412   | 156   | 0.511    | 0.071 | 7.191   | 1.31E-11    | 0.02        | 4688       | 10.240 | 0.911 |
| D18S68   | 160   | 0.162    | 0.068 | 2.388   | 9.06E-03    | 0.02        | 4089       | 8.233  | 0.865 |
| D9S167   | 165   | 0.452    | 0.075 | 6.024   | 5.47E-09    | 0.02        | 3943       | 13.371 | 0.852 |
| D11S987  | 170   | 0.136    | 0.056 | 2.415   | 8.40E-03    | 0.02        | 3874       | 8.765  | 0.845 |
| D4S1592  | 166   | 0.168    | 0.068 | 2.465   | 7.36E-03    | 0.03        | 3636       | 11.859 | 0.822 |
| D5S416   | 166   | 0.149    | 0.062 | 2.390   | 8.99E-03    | 0.03        | 3489       | 8.450  | 0.807 |
| D6S264   | 164   | 0.384    | 0.069 | 5.608   | 4.33E-08    | 0.03        | 3132       | 9.660  | 0.768 |
| D9S286   | 167   | 0.130    | 0.056 | 2.308   | 0.01        | 0.03        | 2800       | 8.540  | 0.732 |
| D10S197  | 164   | 0.206    | 0.064 | 3.222   | 7.69E-04    | 0.03        | 2701       | 9.200  | 0.719 |
| D9S1682  | 164   | 0.200    | 0.078 | 2.575   | 5.46E-03    | 0.04        | 2405       | 12.195 | 0.678 |
| D19S571  | 153   | 0.158    | 0.057 | 2.798   | 2.91E-03    | 0.04        | 2311       | 8.194  | 0.664 |
| D6S1581  | 171   | 0.387    | 0.059 | 6.553   | 3.26E-10    | 0.04        | 2169       | 12.038 | 0.641 |
| D2S2330  | 174   | 0.125    | 0.055 | 2.276   | 0.01        | 0.04        | 2147       | 9.097  | 0.638 |
| D2S174   | 172   | 0.144    | 0.067 | 2.137   | 0.02        | 0.05        | 1962       | 12.039 | 0.610 |
| D4S1572  | 173   | 0.219    | 0.057 | 3.831   | 8.93E-05    | 0.05        | 1921       | 10.379 | 0.603 |
| D7S515   | 170   | 0.188    | 0.051 | 3.681   | 1.56E-04    | 0.05        | 1871       | 10.117 | 0.593 |
| D11S901  | 166   | 0.298    | 0.074 | 4.038   | 4.13E-05    | 0.05        | 1798       | 13.269 | 0.580 |
| D13S285  | 149   | 0.453    | 0.068 | 6.640   | 2.84E-10    | 0.05        | 1727       | 11.967 | 0.566 |
| D12S352  | 163   | 0.402    | 0.107 | 3.743   | 1.27E-04    | 0.05        | 1690       | 16.050 | 0.562 |
| D1S213   | 172   | 0.276    | 0.062 | 4.443   | 7.96E-06    | 0.05        | 1677       | 11.250 | 0.559 |
| D3S1297  | 154   | 0.281    | 0.050 | 5.581   | 5.35E-08    | 0.05        | 1671       | 10.662 | 0.558 |
| D22S274  | 172   | 0.564    | 0.061 | 9.193   | 6.63E-17    | 0.06        | 1609       | 15.568 | 0.545 |
| D15S1007 | 170   | 0.259    | 0.065 | 3.959   | 5.54E-05    | 0.06        | 1594       | 9.886  | 0.542 |
| D6S276   | 169   | 0.159    | 0.070 | 2.268   | 0.01        | 0.06        | 1570       | 9.140  | 0.537 |
| D1S2800  | 172   | 0.267    | 0.062 | 4.328   | 1.28E-05    | 0.06        | 1497       | 11.344 | 0.521 |
| D13S173  | 161   | 0.198    | 0.071 | 2.779   | 3.05E-03    | 0.07        | 1319       | 9.977  | 0.482 |
| D10S591  | 153   | 0.236    | 0.068 | 3.483   | 3.25E-04    | 0.07        | 1309       | 8.672  | 0.479 |
| D14S280  | 150   | 0.177    | 0.071 | 2.495   | 6.85E-03    | 0.07        | 1241       | 8.072  | 0.461 |
| D5S436   | 173   | 0.283    | 0.058 | 4.865   | 1.29E-06    | 0.07        | 1203       | 12.764 | 0.451 |
| D5S419   | 166   | 0.136    | 0.061 | 2.246   | 0.01        | 0.08        | 1192       | 9.055  | 0.448 |
| D9S1817  | 163   | 0.176    | 0.055 | 3.209   | 8.03E-04    | 0.08        | 1178       | 8.887  | 0.448 |
| D13S1265 | 171   | 0.132    | 0.054 | 2.419   | 8.30E-03    | 0.08        | 1100       | 9.554  | 0.425 |
| D11S4191 | 166   | 0.103    | 0.056 | 1.844   | 0.03        | 0.08        | 1096       | 8.865  | 0.424 |
| D4S424   | 165   | 0.145    | 0.058 | 2.483   | 7.01E-03    | 0.08        | 1075       | 9.052  | 0.418 |
| D6S422   | 170   | 0.126    | 0.074 | 1.710   | 0.04        | 0.09        | 1044       | 9.440  | 0.408 |
| D4S2964  | 160   | 0.246    | 0.056 | 4.350   | 1.22E-05    | 0.09        | 998        | 9.688  | 0.397 |
| D4S413   | 171   | 0.124    | 0.054 | 2.304   | 0.01        | 0.09        | 989        | 9.516  | 0.394 |

## SUPPLEMENTARY DATA

|          |     |       |       |       |          |      |     |        |       |
|----------|-----|-------|-------|-------|----------|------|-----|--------|-------|
| D11S1314 | 172 | 0.113 | 0.055 | 2.064 | 0.02     | 0.09 | 948 | 9.242  | 0.381 |
| D5S1981  | 174 | 0.286 | 0.065 | 4.383 | 1.02E-05 | 0.09 | 934 | 11.624 | 0.376 |
| D22S539  | 164 | 0.376 | 0.065 | 5.739 | 2.28E-08 | 0.10 | 896 | 13.066 | 0.366 |
| D1S425   | 162 | 0.107 | 0.054 | 1.988 | 0.02     | 0.11 | 817 | 9.155  | 0.337 |
| D1S413   | 165 | 0.193 | 0.066 | 2.901 | 2.12E-03 | 0.12 | 742 | 10.251 | 0.311 |
| D19S210  | 172 | 0.295 | 0.067 | 4.403 | 9.41E-06 | 0.12 | 728 | 10.018 | 0.305 |
| D4S1575  | 165 | 0.178 | 0.079 | 2.250 | 0.01     | 0.12 | 712 | 8.459  | 0.302 |
| D11S902  | 169 | 0.136 | 0.064 | 2.129 | 0.02     | 0.13 | 635 | 9.489  | 0.271 |
| D2S151   | 171 | 0.110 | 0.059 | 1.877 | 0.03     | 0.13 | 622 | 9.925  | 0.265 |
| D20S117  | 177 | 0.196 | 0.060 | 3.291 | 6.04E-04 | 0.14 | 621 | 10.723 | 0.264 |
| D4S414   | 158 | 0.103 | 0.054 | 1.907 | 0.03     | 0.14 | 612 | 9.239  | 0.260 |
| D22S315  | 160 | 0.194 | 0.056 | 3.463 | 3.43E-04 | 0.14 | 584 | 11.595 | 0.250 |
| D7S657   | 168 | 0.233 | 0.067 | 3.506 | 2.93E-04 | 0.15 | 571 | 11.140 | 0.243 |
| D19S884  | 175 | 0.105 | 0.060 | 1.750 | 0.04     | 0.15 | 545 | 9.933  | 0.233 |
| D16S3068 | 165 | 0.108 | 0.051 | 2.114 | 0.02     | 0.15 | 544 | 8.813  | 0.232 |
| D10S1686 | 159 | 0.197 | 0.068 | 2.884 | 2.24E-03 | 0.15 | 543 | 10.682 | 0.232 |
| D4S1597  | 160 | 0.245 | 0.082 | 2.974 | 1.70E-03 | 0.16 | 523 | 9.340  | 0.221 |
| D4S1534  | 173 | 0.146 | 0.052 | 2.808 | 2.78E-03 | 0.16 | 521 | 10.130 | 0.220 |
| D5S2115  | 171 | 0.142 | 0.051 | 2.801 | 2.85E-03 | 0.16 | 496 | 9.768  | 0.210 |
| D8S260   | 174 | 0.169 | 0.073 | 2.313 | 0.01     | 0.17 | 463 | 10.717 | 0.194 |
| D1S249   | 175 | 0.157 | 0.063 | 2.478 | 7.08E-03 | 0.19 | 419 | 11.695 | 0.170 |
| D3S1267  | 172 | 0.194 | 0.083 | 2.352 | 9.92E-03 | 0.19 | 419 | 10.416 | 0.170 |
| D12S336  | 174 | 0.132 | 0.071 | 1.855 | 0.03     | 0.19 | 416 | 9.392  | 0.168 |
| D12S83   | 164 | 0.125 | 0.068 | 1.833 | 0.03     | 0.20 | 378 | 8.771  | 0.150 |
| D20S186  | 169 | 0.301 | 0.063 | 4.797 | 1.78E-06 | 0.21 | 360 | 12.017 | 0.137 |
| D17S944  | 171 | 0.106 | 0.061 | 1.748 | 0.04     | 0.22 | 348 | 9.577  | 0.132 |
| D1S2797  | 173 | 0.120 | 0.060 | 1.998 | 0.02     | 0.22 | 345 | 10.331 | 0.130 |
| D11S937  | 171 | 0.136 | 0.058 | 2.330 | 0.01     | 0.23 | 327 | 10.002 | 0.120 |
| D13S171  | 162 | 0.193 | 0.081 | 2.377 | 9.32E-03 | 0.25 | 291 | 9.101  | 0.099 |
| D5S471   | 171 | 0.159 | 0.074 | 2.141 | 0.02     | 0.25 | 290 | 10.243 | 0.098 |
| D1S206   | 171 | 0.121 | 0.064 | 1.899 | 0.03     | 0.26 | 272 | 9.398  | 0.087 |
| D2S168   | 174 | 0.148 | 0.077 | 1.924 | 0.03     | 0.26 | 271 | 10.477 | 0.086 |
| D1S196   | 163 | 0.135 | 0.081 | 1.662 | 0.05     | 0.27 | 268 | 10.091 | 0.083 |
| D7S530   | 175 | 0.140 | 0.082 | 1.700 | 0.05     | 0.28 | 245 | 10.129 | 0.070 |
| D15S994  | 72  | 0.664 | 0.118 | 5.624 | 1.78E-07 | 0.29 | 235 | 8.968  | 0.065 |
| D8S550   | 175 | 0.104 | 0.062 | 1.664 | 0.05     | 0.30 | 232 | 9.781  | 0.062 |
| D14S275  | 167 | 0.176 | 0.087 | 2.017 | 0.02     | 0.30 | 231 | 9.023  | 0.061 |
| D10S1651 | 173 | 0.108 | 0.064 | 1.693 | 0.05     | 0.30 | 226 | 9.723  | 0.060 |
| D4S391   | 173 | 0.098 | 0.059 | 1.657 | 0.05     | 0.31 | 214 | 9.816  | 0.052 |
| D15S978  | 166 | 0.133 | 0.073 | 1.826 | 0.03     | 0.33 | 202 | 8.918  | 0.045 |
| D18S478  | 160 | 0.313 | 0.119 | 2.629 | 4.70E-03 | 0.56 | 78  | 12.645 | NA    |
| D4S406   | 171 | 0.081 | 0.049 | 1.645 | 0.05     | -1   | 0   | 9.308  | 0.581 |
| D15S1012 | 165 | 0.116 | 0.071 | 1.645 | 0.05     | -1   | 0   | 9.851  | 0.581 |
| D17S938  | 159 | 0.091 | 0.057 | 1.607 | 0.06     | -1   | 0   | 7.712  | 0.554 |
| D11S1338 | 144 | 0.108 | 0.068 | 1.599 | 0.06     | -1   | 0   | 7.177  | 0.548 |
| D8S514   | 172 | 0.126 | 0.081 | 1.552 | 0.06     | -1   | 0   | 12.422 | 0.518 |
| D10S587  | 164 | 0.099 | 0.064 | 1.537 | 0.06     | -1   | 0   | 9.026  | 0.508 |
| D19S902  | 173 | 0.098 | 0.065 | 1.517 | 0.07     | -1   | 0   | 9.751  | 0.495 |
| D1S2785  | 175 | 0.089 | 0.059 | 1.508 | 0.07     | -1   | 0   | 9.795  | 0.489 |

## SUPPLEMENTARY DATA

|          |     |       |       |       |      |    |   |        |       |
|----------|-----|-------|-------|-------|------|----|---|--------|-------|
| D1S230   | 168 | 0.091 | 0.061 | 1.507 | 0.07 | -1 | 0 | 9.057  | 0.489 |
| D20S889  | 165 | 0.082 | 0.054 | 1.507 | 0.07 | -1 | 0 | 11.018 | 0.488 |
| D3S1300  | 169 | 0.096 | 0.064 | 1.500 | 0.07 | -1 | 0 | 10.696 | 0.484 |
| D7S517   | 169 | 0.088 | 0.059 | 1.489 | 0.07 | -1 | 0 | 9.800  | 0.477 |
| D4S392   | 168 | 0.092 | 0.065 | 1.413 | 0.08 | -1 | 0 | 9.532  | 0.430 |
| D15S1002 | 159 | 0.093 | 0.066 | 1.409 | 0.08 | -1 | 0 | 7.887  | 0.427 |
| D17S785  | 165 | 0.078 | 0.058 | 1.354 | 0.09 | -1 | 0 | 8.027  | 0.395 |
| D19S420  | 168 | 0.070 | 0.053 | 1.318 | 0.09 | -1 | 0 | 9.623  | 0.374 |
| D6S309   | 157 | 0.080 | 0.061 | 1.314 | 0.10 | -1 | 0 | 8.945  | 0.372 |
| D19S221  | 141 | 0.095 | 0.073 | 1.306 | 0.10 | -1 | 0 | 8.054  | 0.367 |
| D10S192  | 166 | 0.079 | 0.060 | 1.302 | 0.10 | -1 | 0 | 9.412  | 0.365 |
| D7S513   | 154 | 0.069 | 0.055 | 1.243 | 0.11 | -1 | 0 | 9.937  | 0.333 |
| D10S1653 | 166 | 0.091 | 0.074 | 1.236 | 0.11 | -1 | 0 | 12.047 | 0.329 |
| D1S2667  | 170 | 0.083 | 0.067 | 1.231 | 0.11 | -1 | 0 | 12.089 | 0.326 |
| D16S516  | 110 | 0.109 | 0.090 | 1.208 | 0.11 | -1 | 0 | 5.814  | 0.313 |
| D12S326  | 163 | 0.103 | 0.086 | 1.196 | 0.12 | -1 | 0 | 9.698  | 0.308 |
| D5S424   | 168 | 0.114 | 0.097 | 1.186 | 0.12 | -1 | 0 | 9.980  | 0.303 |
| D1S252   | 139 | 0.081 | 0.070 | 1.163 | 0.12 | -1 | 0 | 8.697  | 0.291 |
| D8S1771  | 156 | 0.079 | 0.068 | 1.153 | 0.13 | -1 | 0 | 8.264  | 0.286 |
| D17S831  | 27  | 0.185 | 0.161 | 1.147 | 0.13 | -1 | 0 | 1.377  | 0.273 |
| D2S335   | 173 | 0.063 | 0.056 | 1.122 | 0.13 | -1 | 0 | 9.305  | 0.271 |
| D12S78   | 170 | 0.074 | 0.068 | 1.085 | 0.14 | -1 | 0 | 9.592  | 0.254 |
| D6S289   | 172 | 0.101 | 0.093 | 1.076 | 0.14 | -1 | 0 | 10.271 | 0.250 |
| D9S1677  | 170 | 0.059 | 0.055 | 1.073 | 0.14 | -1 | 0 | 9.722  | 0.248 |
| D9S1826  | 157 | 0.082 | 0.077 | 1.068 | 0.14 | -1 | 0 | 7.730  | 0.246 |
| D21S1252 | 173 | 0.068 | 0.064 | 1.065 | 0.14 | -1 | 0 | 9.921  | 0.245 |
| D3S1292  | 175 | 0.073 | 0.071 | 1.022 | 0.15 | -1 | 0 | 10.358 | 0.225 |
| D3S1289  | 174 | 0.065 | 0.064 | 1.016 | 0.16 | -1 | 0 | 10.046 | 0.223 |
| D1S207   | 171 | 0.058 | 0.058 | 1.010 | 0.16 | -1 | 0 | 9.813  | 0.220 |
| D9S175   | 164 | 0.057 | 0.059 | 0.969 | 0.17 | -1 | 0 | 9.072  | 0.203 |
| D9S290   | 170 | 0.055 | 0.057 | 0.966 | 0.17 | -1 | 0 | 9.647  | 0.201 |
| D22S423  | 170 | 0.053 | 0.057 | 0.938 | 0.17 | -1 | 0 | 8.409  | 0.190 |
| D7S630   | 162 | 0.063 | 0.067 | 0.930 | 0.18 | -1 | 0 | 8.752  | 0.187 |
| D1S2890  | 164 | 0.069 | 0.075 | 0.925 | 0.18 | -1 | 0 | 9.501  | 0.185 |
| D4S426   | 171 | 0.064 | 0.070 | 0.918 | 0.18 | -1 | 0 | 12.742 | 0.182 |
| D19S220  | 175 | 0.070 | 0.077 | 0.914 | 0.18 | -1 | 0 | 10.552 | 0.180 |
| D1S468   | 163 | 0.070 | 0.079 | 0.888 | 0.19 | -1 | 0 | 12.006 | 0.170 |
| D16S3046 | 166 | 0.056 | 0.063 | 0.884 | 0.19 | -1 | 0 | 9.290  | 0.169 |
| D18S64   | 161 | 0.059 | 0.068 | 0.864 | 0.19 | -1 | 0 | 7.933  | 0.161 |
| D2S319   | 171 | 0.079 | 0.093 | 0.848 | 0.20 | -1 | 0 | 10.678 | 0.155 |
| D9S164   | 171 | 0.043 | 0.053 | 0.813 | 0.21 | -1 | 0 | 9.960  | 0.143 |
| D6S462   | 159 | 0.066 | 0.081 | 0.813 | 0.21 | -1 | 0 | 8.015  | 0.143 |
| D8S277   | 161 | 0.056 | 0.073 | 0.769 | 0.22 | -1 | 0 | 10.020 | 0.128 |
| D8S272   | 167 | 0.052 | 0.068 | 0.769 | 0.22 | -1 | 0 | 10.724 | 0.128 |
| D12S364  | 168 | 0.053 | 0.071 | 0.747 | 0.23 | -1 | 0 | 10.035 | 0.120 |
| D5S433   | 165 | 0.051 | 0.069 | 0.737 | 0.23 | -1 | 0 | 9.388  | 0.117 |
| D18S474  | 153 | 0.047 | 0.064 | 0.735 | 0.23 | -1 | 0 | 8.793  | 0.117 |
| D14S283  | 160 | 0.056 | 0.079 | 0.709 | 0.24 | -1 | 0 | 8.956  | 0.109 |
| D2S126   | 170 | 0.034 | 0.049 | 0.700 | 0.24 | -1 | 0 | 9.623  | 0.106 |

## SUPPLEMENTARY DATA

|          |     |       |       |        |      |    |   |        |       |
|----------|-----|-------|-------|--------|------|----|---|--------|-------|
| D12S79   | 153 | 0.042 | 0.060 | 0.697  | 0.24 | -1 | 0 | 8.037  | 0.105 |
| D7S507   | 132 | 0.043 | 0.064 | 0.675  | 0.25 | -1 | 0 | 6.425  | 0.098 |
| D5S641   | 159 | 0.048 | 0.074 | 0.640  | 0.26 | -1 | 0 | 9.356  | 0.089 |
| D12S368  | 168 | 0.036 | 0.056 | 0.635  | 0.26 | -1 | 0 | 8.525  | 0.087 |
| D15S117  | 163 | 0.048 | 0.076 | 0.627  | 0.27 | -1 | 0 | 10.281 | 0.085 |
| D13S156  | 153 | 0.055 | 0.088 | 0.625  | 0.27 | -1 | 0 | 8.705  | 0.084 |
| D10S208  | 161 | 0.045 | 0.073 | 0.616  | 0.27 | -1 | 0 | 10.083 | 0.082 |
| D14S985  | 160 | 0.040 | 0.066 | 0.613  | 0.27 | -1 | 0 | 8.125  | 0.081 |
| D6S287   | 146 | 0.050 | 0.083 | 0.599  | 0.28 | -1 | 0 | 10.427 | 0.078 |
| D8S285   | 163 | 0.050 | 0.084 | 0.595  | 0.28 | -1 | 0 | 9.576  | 0.077 |
| D14S74   | 159 | 0.051 | 0.088 | 0.582  | 0.28 | -1 | 0 | 9.280  | 0.073 |
| D9S283   | 172 | 0.036 | 0.063 | 0.569  | 0.29 | -1 | 0 | 9.659  | 0.070 |
| D6S292   | 134 | 0.038 | 0.069 | 0.555  | 0.29 | -1 | 0 | 6.794  | 0.067 |
| D12S1723 | 161 | 0.041 | 0.077 | 0.536  | 0.30 | -1 | 0 | 8.019  | 0.062 |
| D14S65   | 164 | 0.032 | 0.062 | 0.523  | 0.30 | -1 | 0 | 8.404  | 0.059 |
| D7S519   | 171 | 0.052 | 0.108 | 0.484  | 0.31 | -1 | 0 | 13.793 | 0.051 |
| D6S308   | 160 | 0.030 | 0.062 | 0.479  | 0.32 | -1 | 0 | 8.419  | 0.050 |
| D13S217  | 128 | 0.032 | 0.070 | 0.458  | 0.32 | -1 | 0 | 6.593  | 0.045 |
| D13S158  | 161 | 0.039 | 0.089 | 0.433  | 0.33 | -1 | 0 | 9.193  | 0.041 |
| D3S1304  | 166 | 0.037 | 0.090 | 0.405  | 0.34 | -1 | 0 | 9.084  | 0.035 |
| D18S464  | 162 | 0.038 | 0.095 | 0.398  | 0.35 | -1 | 0 | 10.457 | 0.034 |
| D16S3136 | 160 | 0.034 | 0.088 | 0.386  | 0.35 | -1 | 0 | 9.393  | 0.032 |
| D2S2259  | 169 | 0.029 | 0.078 | 0.370  | 0.36 | -1 | 0 | 11.392 | 0.030 |
| D9S171   | 173 | 0.026 | 0.075 | 0.350  | 0.36 | -1 | 0 | 10.033 | 0.027 |
| D20S107  | 174 | 0.023 | 0.064 | 0.350  | 0.36 | -1 | 0 | 10.065 | 0.026 |
| D14S63   | 169 | 0.025 | 0.072 | 0.341  | 0.37 | -1 | 0 | 9.611  | 0.025 |
| D5S408   | 165 | 0.022 | 0.069 | 0.319  | 0.38 | -1 | 0 | 9.548  | 0.022 |
| D10S1779 | 152 | 0.020 | 0.064 | 0.315  | 0.38 | -1 | 0 | 7.573  | 0.022 |
| D10S196  | 162 | 0.016 | 0.059 | 0.274  | 0.39 | -1 | 0 | 8.016  | 0.016 |
| D9S157   | 166 | 0.019 | 0.072 | 0.256  | 0.40 | -1 | 0 | 9.994  | 0.014 |
| D10S217  | 159 | 0.017 | 0.067 | 0.245  | 0.40 | -1 | 0 | 11.715 | 0.013 |
| D9S1776  | 166 | 0.017 | 0.072 | 0.239  | 0.41 | -1 | 0 | 11.786 | 0.012 |
| D6S470   | 169 | 0.015 | 0.065 | 0.234  | 0.41 | -1 | 0 | 9.722  | 0.012 |
| D12S345  | 171 | 0.009 | 0.049 | 0.192  | 0.42 | -1 | 0 | 9.607  | 0.008 |
| D16S404  | 167 | 0.009 | 0.060 | 0.143  | 0.44 | -1 | 0 | 8.929  | 0.004 |
| D12S324  | 157 | 0.009 | 0.067 | 0.142  | 0.44 | -1 | 0 | 8.030  | 0.004 |
| D13S175  | 171 | 0.010 | 0.071 | 0.138  | 0.45 | -1 | 0 | 9.804  | 0.004 |
| D11S4175 | 157 | 0.008 | 0.062 | 0.124  | 0.45 | -1 | 0 | 8.930  | 0.003 |
| D14S261  | 157 | 0.010 | 0.081 | 0.123  | 0.45 | -1 | 0 | 8.946  | 0.003 |
| D12S99   | 169 | 0.005 | 0.048 | 0.104  | 0.46 | -1 | 0 | 8.973  | 0.002 |
| D20S100  | 161 | 0.007 | 0.082 | 0.080  | 0.47 | -1 | 0 | 11.379 | 0.001 |
| D4S405   | 169 | 0.005 | 0.065 | 0.079  | 0.47 | -1 | 0 | 9.654  | 0.001 |
| D1S255   | 169 | 0.005 | 0.072 | 0.073  | 0.47 | -1 | 0 | 9.782  | 0.001 |
| D6S460   | 169 | 0.005 | 0.084 | 0.061  | 0.48 | -1 | 0 | 12.035 | 0.001 |
| D10S1652 | 159 | 0.003 | 0.061 | 0.052  | 0.48 | -1 | 0 | 8.140  | 0.001 |
| D1S238   | 168 | 0.002 | 0.058 | 0.038  | 0.48 | -1 | 0 | 9.643  | 0.000 |
| D12S1617 | 164 | 0.002 | 0.088 | 0.026  | 0.49 | -1 | 0 | 10.040 | 0.000 |
| D11S908  | 168 | 0.002 | 0.084 | 0.018  | 0.49 | -1 | 0 | 11.850 | 0.000 |
| D6S1610  | 170 | 0.000 | 0.077 | -0.004 | 0.50 | -1 | 0 | 9.712  | NA    |

## SUPPLEMENTARY DATA

|          |     |        |       |        |      |    |   |        |    |
|----------|-----|--------|-------|--------|------|----|---|--------|----|
| D16S415  | 165 | -0.002 | 0.062 | -0.031 | 0.51 | -1 | 0 | 8.120  | NA |
| D11S4046 | 168 | -0.003 | 0.065 | -0.045 | 0.52 | -1 | 0 | 10.455 | NA |
| D1S2878  | 165 | -0.004 | 0.076 | -0.048 | 0.52 | -1 | 0 | 10.491 | NA |
| D3S3681  | 172 | -0.004 | 0.064 | -0.065 | 0.53 | -1 | 0 | 9.792  | NA |
| D1S2842  | 174 | -0.006 | 0.069 | -0.090 | 0.54 | -1 | 0 | 9.975  | NA |
| D7S516   | 164 | -0.012 | 0.096 | -0.126 | 0.55 | -1 | 0 | 10.339 | NA |
| D18S1102 | 139 | -0.009 | 0.064 | -0.134 | 0.55 | -1 | 0 | 7.371  | NA |
| D5S422   | 170 | -0.012 | 0.084 | -0.145 | 0.56 | -1 | 0 | 9.882  | NA |
| D19S226  | 171 | -0.010 | 0.071 | -0.145 | 0.56 | -1 | 0 | 11.479 | NA |
| D13S170  | 174 | -0.013 | 0.070 | -0.188 | 0.57 | -1 | 0 | 10.142 | NA |
| D4S2366  | 165 | -0.015 | 0.078 | -0.192 | 0.58 | -1 | 0 | 10.359 | NA |
| D1S450   | 107 | -0.014 | 0.071 | -0.198 | 0.58 | -1 | 0 | 4.804  | NA |
| D12S1659 | 174 | -0.018 | 0.093 | -0.199 | 0.58 | -1 | 0 | 9.879  | NA |
| D6S446   | 168 | -0.018 | 0.088 | -0.206 | 0.58 | -1 | 0 | 13.090 | NA |
| D2S2333  | 165 | -0.011 | 0.048 | -0.221 | 0.59 | -1 | 0 | 8.697  | NA |
| D20S115  | 161 | -0.015 | 0.068 | -0.222 | 0.59 | -1 | 0 | 8.107  | NA |
| D7S669   | 170 | -0.022 | 0.094 | -0.234 | 0.59 | -1 | 0 | 11.554 | NA |
| D5S410   | 165 | -0.022 | 0.089 | -0.243 | 0.60 | -1 | 0 | 10.592 | NA |
| D8S270   | 169 | -0.014 | 0.059 | -0.245 | 0.60 | -1 | 0 | 8.405  | NA |
| D2S396   | 171 | -0.021 | 0.085 | -0.250 | 0.60 | -1 | 0 | 12.050 | NA |
| D12S351  | 173 | -0.020 | 0.079 | -0.257 | 0.60 | -1 | 0 | 9.790  | NA |
| D15S131  | 163 | -0.018 | 0.067 | -0.269 | 0.61 | -1 | 0 | 11.550 | NA |
| D16S423  | 162 | -0.021 | 0.077 | -0.274 | 0.61 | -1 | 0 | 11.095 | NA |
| D2S305   | 58  | -0.032 | 0.116 | -0.278 | 0.61 | -1 | 0 | 2.666  | NA |
| D16S503  | 160 | -0.019 | 0.066 | -0.287 | 0.61 | -1 | 0 | 7.988  | NA |
| D2S2211  | 167 | -0.026 | 0.089 | -0.296 | 0.62 | -1 | 0 | 9.875  | NA |
| D10S537  | 167 | -0.018 | 0.057 | -0.323 | 0.63 | -1 | 0 | 8.363  | NA |
| D17S1852 | 157 | -0.018 | 0.055 | -0.330 | 0.63 | -1 | 0 | 8.202  | NA |
| D11S904  | 162 | -0.023 | 0.063 | -0.372 | 0.64 | -1 | 0 | 8.137  | NA |
| D13S263  | 175 | -0.021 | 0.054 | -0.382 | 0.65 | -1 | 0 | 9.764  | NA |
| D3S1279  | 164 | -0.028 | 0.072 | -0.385 | 0.65 | -1 | 0 | 8.981  | NA |
| D10S1693 | 164 | -0.030 | 0.076 | -0.399 | 0.65 | -1 | 0 | 8.895  | NA |
| D18S452  | 170 | -0.025 | 0.062 | -0.408 | 0.66 | -1 | 0 | 9.734  | NA |
| D12S85   | 167 | -0.031 | 0.075 | -0.414 | 0.66 | -1 | 0 | 9.894  | NA |
| D4S415   | 165 | -0.024 | 0.058 | -0.419 | 0.66 | -1 | 0 | 8.278  | NA |
| D17S949  | 160 | -0.042 | 0.099 | -0.424 | 0.66 | -1 | 0 | 8.138  | NA |
| D17S787  | 167 | -0.023 | 0.052 | -0.435 | 0.67 | -1 | 0 | 9.086  | NA |
| D5S406   | 167 | -0.038 | 0.084 | -0.449 | 0.67 | -1 | 0 | 10.139 | NA |
| D17S1868 | 146 | -0.030 | 0.067 | -0.451 | 0.67 | -1 | 0 | 7.946  | NA |
| D2S364   | 166 | -0.031 | 0.067 | -0.459 | 0.68 | -1 | 0 | 9.599  | NA |
| D2S391   | 174 | -0.036 | 0.075 | -0.486 | 0.69 | -1 | 0 | 10.963 | NA |
| D8S284   | 166 | -0.034 | 0.067 | -0.506 | 0.69 | -1 | 0 | 9.372  | NA |
| D7S640   | 172 | -0.025 | 0.048 | -0.507 | 0.69 | -1 | 0 | 9.827  | NA |
| D11S898  | 161 | -0.033 | 0.063 | -0.518 | 0.70 | -1 | 0 | 8.224  | NA |
| D3S1277  | 120 | -0.037 | 0.068 | -0.548 | 0.71 | -1 | 0 | 6.009  | NA |
| D10S249  | 171 | -0.045 | 0.083 | -0.550 | 0.71 | -1 | 0 | 10.390 | NA |
| D7S493   | 176 | -0.032 | 0.057 | -0.561 | 0.71 | -1 | 0 | 9.918  | NA |
| D8S505   | 158 | -0.058 | 0.098 | -0.591 | 0.72 | -1 | 0 | 12.085 | NA |
| D9S285   | 170 | -0.035 | 0.058 | -0.609 | 0.73 | -1 | 0 | 8.551  | NA |

## SUPPLEMENTARY DATA

|          |     |        |       |        |      |    |   |        |    |
|----------|-----|--------|-------|--------|------|----|---|--------|----|
| D6S1574  | 168 | -0.043 | 0.067 | -0.640 | 0.74 | -1 | 0 | 9.539  | NA |
| D4S403   | 172 | -0.059 | 0.092 | -0.641 | 0.74 | -1 | 0 | 10.995 | NA |
| D15S153  | 163 | -0.062 | 0.097 | -0.641 | 0.74 | -1 | 0 | 11.126 | NA |
| D17S784  | 164 | -0.055 | 0.085 | -0.651 | 0.74 | -1 | 0 | 11.459 | NA |
| D4S1535  | 158 | -0.041 | 0.063 | -0.654 | 0.74 | -1 | 0 | 7.866  | NA |
| D4S419   | 166 | -0.055 | 0.083 | -0.670 | 0.75 | -1 | 0 | 11.535 | NA |
| D22S283  | 174 | -0.033 | 0.048 | -0.698 | 0.76 | -1 | 0 | 9.874  | NA |
| D8S264   | 172 | -0.049 | 0.070 | -0.700 | 0.76 | -1 | 0 | 10.331 | NA |
| D2S162   | 170 | -0.057 | 0.077 | -0.737 | 0.77 | -1 | 0 | 9.954  | NA |
| D8S258   | 172 | -0.052 | 0.066 | -0.794 | 0.79 | -1 | 0 | 9.929  | NA |
| D19S414  | 143 | -0.057 | 0.071 | -0.795 | 0.79 | -1 | 0 | 6.379  | NA |
| D5S2027  | 175 | -0.066 | 0.081 | -0.820 | 0.79 | -1 | 0 | 10.342 | NA |
| D2S125   | 167 | -0.051 | 0.062 | -0.831 | 0.80 | -1 | 0 | 9.673  | NA |
| D15S127  | 142 | -0.058 | 0.070 | -0.831 | 0.80 | -1 | 0 | 8.798  | NA |
| D10S185  | 169 | -0.059 | 0.070 | -0.836 | 0.80 | -1 | 0 | 9.800  | NA |
| D15S130  | 133 | -0.060 | 0.072 | -0.840 | 0.80 | -1 | 0 | 6.976  | NA |
| D13S159  | 164 | -0.076 | 0.088 | -0.860 | 0.80 | -1 | 0 | 10.348 | NA |
| D9S287   | 166 | -0.061 | 0.070 | -0.871 | 0.81 | -1 | 0 | 9.086  | NA |
| D20S171  | 168 | -0.066 | 0.074 | -0.894 | 0.81 | -1 | 0 | 9.677  | NA |
| D18S1161 | 173 | -0.065 | 0.069 | -0.938 | 0.83 | -1 | 0 | 10.535 | NA |
| D3S1569  | 170 | -0.068 | 0.072 | -0.945 | 0.83 | -1 | 0 | 11.254 | NA |
| D3S1278  | 169 | -0.057 | 0.060 | -0.949 | 0.83 | -1 | 0 | 9.380  | NA |
| D12S310  | 73  | -0.117 | 0.123 | -0.954 | 0.83 | -1 | 0 | 4.103  | NA |
| D14S292  | 164 | -0.065 | 0.068 | -0.960 | 0.83 | -1 | 0 | 8.306  | NA |
| D7S510   | 172 | -0.079 | 0.083 | -0.961 | 0.83 | -1 | 0 | 10.346 | NA |
| D3S1266  | 167 | -0.075 | 0.078 | -0.961 | 0.83 | -1 | 0 | 9.611  | NA |
| D15S165  | 160 | -0.073 | 0.073 | -1.000 | 0.84 | -1 | 0 | 8.973  | NA |
| D6S441   | 167 | -0.049 | 0.049 | -1.000 | 0.84 | -1 | 0 | 9.855  | NA |
| D17S798  | 160 | -0.067 | 0.065 | -1.019 | 0.85 | -1 | 0 | 8.185  | NA |
| D7S531   | 148 | -0.048 | 0.047 | -1.024 | 0.85 | -1 | 0 | 7.483  | NA |
| D7S484   | 169 | -0.082 | 0.079 | -1.039 | 0.85 | -1 | 0 | 10.459 | NA |
| D7S502   | 159 | -0.082 | 0.076 | -1.067 | 0.86 | -1 | 0 | 10.238 | NA |
| D3S1271  | 166 | -0.086 | 0.079 | -1.080 | 0.86 | -1 | 0 | 8.922  | NA |
| D10S597  | 163 | -0.098 | 0.088 | -1.107 | 0.87 | -1 | 0 | 11.308 | NA |
| D13S265  | 149 | -0.080 | 0.071 | -1.128 | 0.87 | -1 | 0 | 8.164  | NA |
| D20S195  | 157 | -0.074 | 0.064 | -1.155 | 0.88 | -1 | 0 | 8.350  | NA |
| D2S160   | 171 | -0.069 | 0.059 | -1.160 | 0.88 | -1 | 0 | 10.040 | NA |
| D18S53   | 164 | -0.082 | 0.070 | -1.170 | 0.88 | -1 | 0 | 9.304  | NA |
| D8S1784  | 166 | -0.113 | 0.096 | -1.180 | 0.88 | -1 | 0 | 10.121 | NA |
| D2S347   | 171 | -0.071 | 0.059 | -1.198 | 0.88 | -1 | 0 | 10.008 | NA |
| D1S218   | 167 | -0.073 | 0.059 | -1.226 | 0.89 | -1 | 0 | 9.729  | NA |
| D6S281   | 159 | -0.090 | 0.074 | -1.230 | 0.89 | -1 | 0 | 7.870  | NA |
| D3S1311  | 168 | -0.074 | 0.060 | -1.233 | 0.89 | -1 | 0 | 8.862  | NA |
| D13S153  | 164 | -0.080 | 0.064 | -1.263 | 0.90 | -1 | 0 | 9.134  | NA |
| D15S128  | 170 | -0.097 | 0.075 | -1.282 | 0.90 | -1 | 0 | 9.421  | NA |
| D2S337   | 166 | -0.067 | 0.051 | -1.300 | 0.90 | -1 | 0 | 8.218  | NA |
| D6S257   | 168 | -0.086 | 0.065 | -1.324 | 0.91 | -1 | 0 | 11.105 | NA |
| D14S70   | 162 | -0.078 | 0.058 | -1.348 | 0.91 | -1 | 0 | 9.163  | NA |
| D2S117   | 168 | -0.092 | 0.065 | -1.415 | 0.92 | -1 | 0 | 9.610  | NA |

## SUPPLEMENTARY DATA

|          |     |        |       |        |      |    |   |        |    |
|----------|-----|--------|-------|--------|------|----|---|--------|----|
| D3S1285  | 172 | -0.107 | 0.073 | -1.457 | 0.93 | -1 | 0 | 11.685 | NA |
| D18S462  | 157 | -0.102 | 0.070 | -1.459 | 0.93 | -1 | 0 | 8.332  | NA |
| D9S1690  | 163 | -0.119 | 0.081 | -1.476 | 0.93 | -1 | 0 | 10.755 | NA |
| D12S346  | 168 | -0.092 | 0.061 | -1.513 | 0.93 | -1 | 0 | 9.858  | NA |
| D5S400   | 163 | -0.091 | 0.060 | -1.514 | 0.93 | -1 | 0 | 8.001  | NA |
| D10S212  | 163 | -0.101 | 0.067 | -1.514 | 0.93 | -1 | 0 | 8.441  | NA |
| D3S1262  | 171 | -0.109 | 0.070 | -1.545 | 0.94 | -1 | 0 | 12.516 | NA |
| D3S1614  | 163 | -0.091 | 0.059 | -1.546 | 0.94 | -1 | 0 | 9.130  | NA |
| D21S1914 | 164 | -0.095 | 0.059 | -1.607 | 0.95 | -1 | 0 | 8.834  | NA |
| D9S161   | 162 | -0.141 | 0.086 | -1.634 | 0.95 | -1 | 0 | 10.171 | NA |
| D14S258  | 162 | -0.100 | 0.061 | -1.635 | 0.95 | -1 | 0 | 7.917  | NA |
| D14S276  | 160 | -0.121 | 0.073 | -1.658 | 0.95 | -1 | 0 | 8.814  | NA |
| D22S420  | 164 | -0.232 | 0.140 | -1.657 | 0.95 | -1 | 0 | 13.722 | NA |
| D20S112  | 170 | -0.096 | 0.057 | -1.692 | 0.95 | -1 | 0 | 9.787  | NA |
| D2S338   | 174 | -0.109 | 0.063 | -1.739 | 0.96 | -1 | 0 | 10.259 | NA |
| D5S428   | 169 | -0.116 | 0.066 | -1.741 | 0.96 | -1 | 0 | 11.098 | NA |
| D2S286   | 141 | -0.126 | 0.072 | -1.744 | 0.96 | -1 | 0 | 7.865  | NA |
| D20S173  | 157 | -0.112 | 0.064 | -1.744 | 0.96 | -1 | 0 | 7.490  | NA |
| D16S3075 | 161 | -0.105 | 0.060 | -1.744 | 0.96 | -1 | 0 | 9.191  | NA |
| D5S647   | 169 | -0.121 | 0.069 | -1.751 | 0.96 | -1 | 0 | 11.168 | NA |
| D2S142   | 169 | -0.120 | 0.068 | -1.766 | 0.96 | -1 | 0 | 14.241 | NA |
| D1S234   | 171 | -0.125 | 0.070 | -1.769 | 0.96 | -1 | 0 | 11.751 | NA |
| D2S325   | 170 | -0.114 | 0.064 | -1.793 | 0.96 | -1 | 0 | 9.926  | NA |
| D22S280  | 175 | -0.098 | 0.054 | -1.811 | 0.96 | -1 | 0 | 9.988  | NA |
| D14S288  | 171 | -0.115 | 0.063 | -1.827 | 0.97 | -1 | 0 | 9.703  | NA |
| D21S266  | 164 | -0.154 | 0.083 | -1.850 | 0.97 | -1 | 0 | 9.664  | NA |
| D7S798   | 170 | -0.101 | 0.054 | -1.873 | 0.97 | -1 | 0 | 12.683 | NA |
| D2S206   | 160 | -0.157 | 0.084 | -1.877 | 0.97 | -1 | 0 | 9.580  | NA |
| D6S262   | 162 | -0.134 | 0.071 | -1.879 | 0.97 | -1 | 0 | 10.318 | NA |
| D18S70   | 159 | -0.111 | 0.058 | -1.892 | 0.97 | -1 | 0 | 8.468  | NA |
| D20S119  | 177 | -0.123 | 0.063 | -1.948 | 0.97 | -1 | 0 | 10.098 | NA |
| D3S1566  | 97  | -0.150 | 0.076 | -1.992 | 0.98 | -1 | 0 | 4.909  | NA |
| D18S61   | 161 | -0.128 | 0.065 | -1.986 | 0.98 | -1 | 0 | 11.905 | NA |
| D12S86   | 143 | -0.115 | 0.056 | -2.040 | 0.98 | -1 | 0 | 6.937  | NA |
| D2S2216  | 173 | -0.120 | 0.058 | -2.065 | 0.98 | -1 | 0 | 9.693  | NA |
| D3S1263  | 149 | -0.141 | 0.066 | -2.130 | 0.98 | -1 | 0 | 8.984  | NA |
| D11S968  | 172 | -0.137 | 0.063 | -2.185 | 0.98 | -1 | 0 | 8.945  | NA |
| D1S2841  | 163 | -0.142 | 0.065 | -2.195 | 0.99 | -1 | 0 | 9.624  | NA |
| D3S1580  | 171 | -0.147 | 0.067 | -2.205 | 0.99 | -1 | 0 | 11.669 | NA |
| D2S367   | 163 | -0.141 | 0.064 | -2.211 | 0.99 | -1 | 0 | 9.327  | NA |
| D7S684   | 164 | -0.132 | 0.059 | -2.243 | 0.99 | -1 | 0 | 9.113  | NA |
| D16S515  | 158 | -0.146 | 0.065 | -2.254 | 0.99 | -1 | 0 | 11.144 | NA |
| D4S1539  | 160 | -0.178 | 0.078 | -2.282 | 0.99 | -1 | 0 | 10.597 | NA |
| D7S2465  | 139 | -0.174 | 0.076 | -2.293 | 0.99 | -1 | 0 | 9.277  | NA |
| D1S2836  | 145 | -0.200 | 0.083 | -2.405 | 0.99 | -1 | 0 | 11.495 | NA |
| D17S921  | 158 | -0.155 | 0.064 | -2.434 | 0.99 | -1 | 0 | 13.087 | NA |
| D16S520  | 166 | -0.157 | 0.063 | -2.477 | 0.99 | -1 | 0 | 12.086 | NA |
| D3S1565  | 166 | -0.163 | 0.065 | -2.530 | 0.99 | -1 | 0 | 9.505  | NA |
| D1S484   | 167 | -0.206 | 0.076 | -2.701 | 1.00 | -1 | 0 | 9.902  | NA |

## SUPPLEMENTARY DATA

|          |     |        |       |        |      |    |   |        |    |
|----------|-----|--------|-------|--------|------|----|---|--------|----|
| D3S2338  | 168 | -0.155 | 0.057 | -2.730 | 1.00 | -1 | 0 | 14.989 | NA |
| D17S1857 | 167 | -0.157 | 0.057 | -2.759 | 1.00 | -1 | 0 | 9.183  | NA |
| D2S2368  | 170 | -0.160 | 0.057 | -2.825 | 1.00 | -1 | 0 | 9.342  | NA |
| D2S2382  | 170 | -0.180 | 0.063 | -2.842 | 1.00 | -1 | 0 | 9.629  | NA |
| D1S2697  | 163 | -0.238 | 0.081 | -2.923 | 1.00 | -1 | 0 | 10.464 | NA |
| D5S418   | 172 | -0.190 | 0.065 | -2.945 | 1.00 | -1 | 0 | 13.556 | NA |
| D11S1320 | 158 | -0.222 | 0.075 | -2.949 | 1.00 | -1 | 0 | 10.432 | NA |
| D17S799  | 165 | -0.242 | 0.081 | -2.978 | 1.00 | -1 | 0 | 9.656  | NA |
| D3S1601  | 169 | -0.181 | 0.061 | -2.985 | 1.00 | -1 | 0 | 10.044 | NA |
| D5S407   | 171 | -0.128 | 0.042 | -3.038 | 1.00 | -1 | 0 | 13.439 | NA |
| D7S486   | 162 | -0.213 | 0.069 | -3.104 | 1.00 | -1 | 0 | 11.442 | NA |
| D5S426   | 151 | -0.233 | 0.075 | -3.114 | 1.00 | -1 | 0 | 11.432 | NA |
| D16S3091 | 162 | -0.167 | 0.053 | -3.175 | 1.00 | -1 | 0 | 9.809  | NA |
| D19S216  | 165 | -0.240 | 0.074 | -3.230 | 1.00 | -1 | 0 | 9.983  | NA |
| D17S928  | 165 | -0.260 | 0.079 | -3.310 | 1.00 | -1 | 0 | 11.491 | NA |
| D17S849  | 157 | -0.242 | 0.071 | -3.390 | 1.00 | -1 | 0 | 11.694 | NA |
| D11S4151 | 159 | -0.214 | 0.063 | -3.395 | 1.00 | -1 | 0 | 10.284 | NA |
| D5S644   | 174 | -0.248 | 0.063 | -3.931 | 1.00 | -1 | 0 | 12.380 | NA |
| D13S218  | 167 | -0.251 | 0.064 | -3.951 | 1.00 | -1 | 0 | 11.148 | NA |
| D18S59   | 169 | -0.244 | 0.062 | -3.958 | 1.00 | -1 | 0 | 11.528 | NA |
| D1S2726  | 171 | -0.293 | 0.073 | -4.020 | 1.00 | -1 | 0 | 13.203 | NA |
| D7S661   | 167 | -0.225 | 0.055 | -4.119 | 1.00 | -1 | 0 | 8.974  | NA |
| D15S120  | 162 | -0.298 | 0.068 | -4.387 | 1.00 | -1 | 0 | 9.354  | NA |
| D15S205  | 165 | -0.280 | 0.060 | -4.649 | 1.00 | -1 | 0 | 9.927  | NA |
| D7S636   | 129 | -0.413 | 0.071 | -5.819 | 1.00 | -1 | 0 | 10.460 | NA |
| D11S925  | 159 | -0.395 | 0.062 | -6.341 | 1.00 | -1 | 0 | 10.826 | NA |
| D18S63   | 163 | -0.467 | 0.064 | -7.280 | 1.00 | -1 | 0 | 11.817 | NA |

SUPPLEMENTARY DATA

**Supplementary Table S3. Summary statistics from the *CACNB2* candidate gene association study for all variants with MAF $\geq$ 0.1%, imputation  $r^2\geq$ 0.6, and within 100kb of *CACNB2* gene**

| SNP         | CHR:POS REF/ALT   | AF    | HWE <sub>p</sub> | OR    | OR 95% CI   | P               | Rsq   | Genotyped |
|-------------|-------------------|-------|------------------|-------|-------------|-----------------|-------|-----------|
| rs11014284  | 10:18740084_T/G   | 0.278 | 0.580            | 0.826 | 0.738 0.924 | <b>8.62E-04</b> | 0.989 | Imputed   |
| rs7091297   | 10:18733555_A/G   | 0.277 | 0.608            | 0.828 | 0.740 0.926 | <b>9.52E-04</b> | 0.997 | Imputed   |
| rs11014266  | 10:18736902_T/C   | 0.277 | 0.664            | 0.828 | 0.740 0.927 | <b>1.02E-03</b> | 0.993 | Imputed   |
| rs80139106  | 10:18657089_T/C   | 0.091 | 0.433            | 1.347 | 1.127 1.610 | <b>1.07E-03</b> | 0.936 | Imputed   |
| rs10508561  | 10:18734235_G/A   | 0.276 | 0.608            | 0.830 | 0.742 0.928 | <b>1.11E-03</b> | 0.999 | Genotyped |
| rs201617404 | 10:18624058_T/TA  | 0.120 | 0.101            | 1.317 | 1.116 1.554 | <b>1.13E-03</b> | 0.853 | Imputed   |
| rs7894306   | 10:18617178_T/C   | 0.111 | 0.738            | 1.325 | 1.116 1.572 | <b>1.28E-03</b> | 0.865 | Imputed   |
| rs11013624  | 10:18614995_A/G   | 0.126 | 0.462            | 1.296 | 1.104 1.522 | <b>1.54E-03</b> | 0.874 | Imputed   |
| rs115185209 | 10:18653195_T/C   | 0.109 | 0.121            | 1.292 | 1.100 1.518 | <b>1.83E-03</b> | 0.957 | Imputed   |
| rs17684350  | 10:18663611_A/C   | 0.109 | 0.070            | 1.293 | 1.100 1.520 | <b>1.84E-03</b> | 0.948 | Imputed   |
| rs188244333 | 10:18848794_T/C   | 0.002 | 1.000            | 0.075 | 0.014 0.393 | <b>2.14E-03</b> | 0.648 | Imputed   |
| rs184292376 | 10:18843230_G/A   | 0.002 | 1.000            | 0.076 | 0.015 0.395 | <b>2.15E-03</b> | 0.646 | Imputed   |
| rs61839208  | 10:18631215_A/C   | 0.123 | 0.654            | 1.273 | 1.088 1.490 | <b>2.62E-03</b> | 0.923 | Imputed   |
| rs17611696  | 10:18673100_C/T   | 0.090 | 0.276            | 1.317 | 1.101 1.576 | <b>2.62E-03</b> | 0.930 | Imputed   |
| rs11594922  | 10:18642730_A/G   | 0.116 | 0.818            | 1.268 | 1.085 1.481 | <b>2.77E-03</b> | 0.995 | Genotyped |
| rs12573736  | 10:18630649_T/C   | 0.125 | 0.710            | 1.271 | 1.085 1.488 | <b>2.89E-03</b> | 0.911 | Imputed   |
| rs61839228  | 10:18674891_A/G   | 0.090 | 0.063            | 1.315 | 1.098 1.574 | <b>2.91E-03</b> | 0.919 | Imputed   |
| rs11599327  | 10:18614066_T/G   | 0.130 | 0.241            | 1.267 | 1.080 1.487 | <b>3.73E-03</b> | 0.855 | Imputed   |
| 10:18632713 | 10:18632713_A/AC  | 0.002 | 1.000            | 0.099 | 0.021 0.475 | <b>3.85E-03</b> | 0.676 | Imputed   |
| rs1331329   | 10:18536727_T/A   | 0.272 | 0.000            | 1.196 | 1.057 1.354 | <b>4.51E-03</b> | 0.816 | Imputed   |
| rs181035546 | 10:18917727_G/A   | 0.003 | 1.000            | 0.265 | 0.104 0.677 | <b>5.50E-03</b> | 0.965 | Imputed   |
| rs201135251 | 10:18753346_T/A   | 0.528 | 0.009            | 0.858 | 0.770 0.956 | <b>5.61E-03</b> | 0.866 | Imputed   |
| rs202179492 | 10:18753347_T/A   | 0.528 | 0.009            | 0.858 | 0.770 0.956 | <b>5.61E-03</b> | 0.866 | Imputed   |
| rs61842001  | 10:18731193_G/C   | 0.206 | 0.527            | 0.839 | 0.741 0.951 | <b>5.99E-03</b> | 0.990 | Imputed   |
| rs7099509   | 10:18732074_G/A   | 0.431 | 0.897            | 1.151 | 1.040 1.273 | <b>6.56E-03</b> | 0.991 | Imputed   |
| rs7090956   | 10:18733281_A/G   | 0.569 | 0.797            | 0.873 | 0.789 0.965 | <b>8.17E-03</b> | 0.993 | Imputed   |
| rs11014261  | 10:18735948_C/T   | 0.527 | 0.205            | 0.873 | 0.789 0.966 | <b>8.54E-03</b> | 0.992 | Imputed   |
| rs61733968  | 10:18828486_C/G   | 0.007 | 0.053            | 0.363 | 0.171 0.774 | <b>8.69E-03</b> | 0.601 | Imputed   |
| rs11012694  | 10:18393473_C/T   | 0.292 | 0.582            | 0.856 | 0.762 0.962 | <b>8.82E-03</b> | 0.906 | Imputed   |
| rs10828242  | 10:18392980_G/A   | 0.286 | 0.449            | 0.856 | 0.761 0.962 | <b>8.99E-03</b> | 0.903 | Imputed   |
| rs72454331  | 10:18386891_CT/C  | 0.263 | 0.001            | 0.839 | 0.736 0.957 | <b>9.04E-03</b> | 0.750 | Imputed   |
| rs7091299   | 10:18733562_A/T   | 0.529 | 0.228            | 0.874 | 0.790 0.967 | <b>9.19E-03</b> | 0.992 | Imputed   |
| rs11014256  | 10:18734965_T/A   | 0.529 | 0.241            | 0.874 | 0.790 0.968 | <b>9.36E-03</b> | 0.993 | Imputed   |
| rs10828704  | 10:18734976_G/C   | 0.529 | 0.254            | 0.877 | 0.792 0.970 | 0.011           | 0.994 | Imputed   |
| rs7919793   | 10:18633777_A/G   | 0.135 | 0.946            | 1.216 | 1.045 1.413 | 0.011           | 0.940 | Imputed   |
| rs11012380  | 10:18341741_C/A   | 0.068 | 0.707            | 0.773 | 0.633 0.944 | 0.011           | 0.961 | Imputed   |
| rs11014299  | 10:18743437_T/G   | 0.236 | 0.284            | 0.857 | 0.760 0.966 | 0.011           | 0.962 | Imputed   |
| rs7080093   | 10:18341152_T/G   | 0.069 | 0.707            | 0.773 | 0.633 0.944 | 0.011           | 0.955 | Imputed   |
| rs11592650  | 10:18632925_T/G   | 0.136 | 1.000            | 1.215 | 1.045 1.413 | 0.011           | 0.933 | Imputed   |
| rs11594555  | 10:18446207_T/C   | 0.343 | 0.098            | 0.874 | 0.787 0.971 | 0.012           | 0.989 | Imputed   |
| rs143843865 | 10:18836817_T/C   | 0.006 | 1.000            | 2.796 | 1.255 6.228 | 0.012           | 0.602 | Imputed   |
| rs10828726  | 10:18744948_G/A   | 0.529 | 0.310            | 0.877 | 0.792 0.972 | 0.012           | 0.974 | Imputed   |
| rs145664101 | 10:18589202_C/T   | 0.016 | 0.545            | 1.723 | 1.127 2.635 | 0.012           | 0.880 | Imputed   |
| 10:18735773 | 10:18735773_C/T   | 0.005 | 1.000            | 0.350 | 0.154 0.795 | 0.012           | 0.788 | Imputed   |
| rs146740572 | 10:18895125_A/G   | 0.004 | 1.000            | 3.464 | 1.311 9.150 | 0.012           | 0.661 | Imputed   |
| rs7087949   | 10:18383222_G/A   | 0.199 | 0.326            | 0.844 | 0.739 0.964 | 0.012           | 0.889 | Imputed   |
| rs61842000  | 10:18728169_A/G   | 0.196 | 0.800            | 0.850 | 0.748 0.965 | 0.012           | 0.987 | Imputed   |
| rs11014317  | 10:18745595_G/C   | 0.531 | 0.392            | 0.877 | 0.792 0.972 | 0.012           | 0.970 | Imputed   |
| rs80137559  | 10:18335103_T/C   | 0.022 | 0.255            | 0.638 | 0.449 0.908 | 0.012           | 0.903 | Imputed   |
| 10:18738868 | 10:18738868_C/A   | 0.005 | 1.000            | 0.352 | 0.155 0.799 | 0.012           | 0.790 | Imputed   |
| rs11014302  | 10:18743866_G/A   | 0.530 | 0.341            | 0.878 | 0.793 0.972 | 0.013           | 0.977 | Imputed   |
| rs10741073  | 10:18746965_C/A   | 0.529 | 0.486            | 0.878 | 0.792 0.973 | 0.013           | 0.965 | Imputed   |
| rs35467019  | 10:18746027_G/GT  | 0.530 | 0.358            | 0.878 | 0.793 0.973 | 0.013           | 0.970 | Imputed   |
| rs10764427  | 10:18636887_G/T   | 0.132 | 0.891            | 1.212 | 1.041 1.411 | 0.013           | 0.948 | Imputed   |
| rs111449941 | 10:18593138_G/A   | 0.102 | 0.153            | 1.261 | 1.049 1.515 | 0.013           | 0.803 | Imputed   |
| rs12220716  | 10:18763663_C/T   | 0.232 | 0.623            | 0.860 | 0.763 0.969 | 0.013           | 0.976 | Imputed   |
| rs4747341   | 10:18606183_T/A   | 0.184 | 0.009            | 1.189 | 1.036 1.365 | 0.014           | 0.859 | Imputed   |
| rs117800563 | 10:18664854_A/G   | 0.013 | 0.027            | 1.916 | 1.136 3.232 | 0.015           | 0.665 | Imputed   |
| rs57479471  | 10:18401170_CGG/C | 0.474 | 0.193            | 0.879 | 0.793 0.975 | 0.015           | 0.928 | Imputed   |
| rs11337812  | 10:18704396_TA/T  | 0.831 | 0.772            | 0.841 | 0.732 0.967 | 0.015           | 0.936 | Imputed   |
| rs4573589   | 10:18387746_G/A   | 0.266 | 0.199            | 0.865 | 0.769 0.973 | 0.016           | 0.917 | Imputed   |
| rs78303166  | 10:18616083_C/A   | 0.015 | 0.589            | 1.685 | 1.104 2.571 | 0.016           | 0.925 | Imputed   |
| rs78596308  | 10:18329988_A/C   | 0.021 | 0.244            | 0.647 | 0.455 0.921 | 0.016           | 0.907 | Imputed   |
| rs118086164 | 10:18653821_G/A   | 0.014 | 0.004            | 1.698 | 1.105 2.609 | 0.016           | 0.878 | Imputed   |
| rs113327684 | 10:18330774_GTA/G | 0.021 | 0.244            | 0.649 | 0.456 0.924 | 0.016           | 0.917 | Imputed   |
| rs11014337  | 10:18750094_C/T   | 0.225 | 0.167            | 0.863 | 0.764 0.975 | 0.018           | 0.953 | Imputed   |
| rs16916801  | 10:18335951_A/G   | 0.021 | 0.244            | 0.653 | 0.458 0.931 | 0.018           | 0.935 | Imputed   |
| rs182532944 | 10:18916863_T/C   | 0.049 | 0.580            | 1.369 | 1.053 1.778 | 0.019           | 0.783 | Imputed   |
| rs16916797  | 10:18333790_A/C   | 0.021 | 0.244            | 0.656 | 0.462 0.933 | 0.019           | 0.913 | Imputed   |
| rs370241796 | 10:18481245_T/C   | 0.004 | 1.000            | 2.982 | 1.195 7.442 | 0.019           | 0.836 | Imputed   |
| rs12772518  | 10:18795708_G/A   | 0.007 | 0.098            | 0.443 | 0.224 0.877 | 0.019           | 0.708 | Imputed   |
| rs7919238   | 10:18392126_T/C   | 0.272 | 0.369            | 0.870 | 0.774 0.978 | 0.020           | 0.924 | Imputed   |

SUPPLEMENTARY DATA

|             |                       |       |       |       |       |       |       |       |           |
|-------------|-----------------------|-------|-------|-------|-------|-------|-------|-------|-----------|
| rs17692465  | 10:18750788_A/G       | 0.228 | 0.131 | 0.865 | 0.766 | 0.977 | 0.020 | 0.949 | Imputed   |
| rs12765646  | 10:18747868_C/T       | 0.729 | 1.000 | 0.873 | 0.779 | 0.979 | 0.020 | 0.973 | Imputed   |
| rs11014270  | 10:18737302_T/A       | 0.730 | 0.841 | 0.874 | 0.781 | 0.979 | 0.020 | 0.995 | Imputed   |
| rs11014262  | 10:18736474_A/G       | 0.730 | 0.841 | 0.875 | 0.781 | 0.979 | 0.020 | 0.993 | Imputed   |
| rs10828706  | 10:18735382_A/G       | 0.730 | 0.904 | 0.875 | 0.781 | 0.979 | 0.020 | 0.994 | Imputed   |
| rs141588346 | 10:18672884_C/A       | 0.073 | 1.108 | 0.791 | 0.648 | 0.964 | 0.020 | 0.939 | Imputed   |
| rs10828705  | 10:18735355_T/G       | 0.729 | 0.904 | 0.875 | 0.782 | 0.980 | 0.020 | 0.994 | Imputed   |
| rs10828707  | 10:18735395_T/C       | 0.729 | 0.904 | 0.875 | 0.782 | 0.980 | 0.020 | 0.993 | Imputed   |
| rs9299787   | 10:18734311_A/G       | 0.730 | 0.936 | 0.875 | 0.782 | 0.980 | 0.020 | 0.994 | Imputed   |
| rs729245    | 10:18741794_T/C       | 0.730 | 0.904 | 0.875 | 0.782 | 0.980 | 0.021 | 1.000 | Genotyped |
| rs4747346   | 10:18732385_C/T       | 0.730 | 0.936 | 0.875 | 0.782 | 0.980 | 0.021 | 0.994 | Imputed   |
| rs1935503   | 10:18401960_A/G       | 0.436 | 1.130 | 0.885 | 0.797 | 0.981 | 0.021 | 0.933 | Imputed   |
| rs117546984 | 10:18575026_A/G       | 0.003 | 1.000 | 3.057 | 1.186 | 7.878 | 0.021 | 0.819 | Imputed   |
| rs75416381  | 10:18869256_G/C       | 0.194 | 0.650 | 1.163 | 1.023 | 1.321 | 0.021 | 0.958 | Imputed   |
| rs10828866  | 10:18823420_G/C       | 0.190 | 1.144 | 1.165 | 1.023 | 1.326 | 0.021 | 0.942 | Imputed   |
| rs1001485   | 10:18742210_A/G       | 0.730 | 0.936 | 0.876 | 0.782 | 0.980 | 0.021 | 0.999 | Imputed   |
| rs1779244   | 10:18477625_A/C       | 0.930 | 0.383 | 1.266 | 1.035 | 1.549 | 0.021 | 0.941 | Imputed   |
| rs2482100   | 10:18481080_A/G       | 0.860 | 0.089 | 1.191 | 1.026 | 1.383 | 0.022 | 0.921 | Imputed   |
| 10:18919763 | 10:18919763_A/G       | 0.005 | 1.000 | 0.384 | 0.169 | 0.871 | 0.022 | 0.728 | Imputed   |
| rs11819342  | 10:18635356_T/C       | 0.164 | 0.454 | 1.176 | 1.024 | 1.350 | 0.022 | 0.941 | Imputed   |
| rs147422176 | 10:18854147_C/T       | 0.005 | 1.000 | 0.401 | 0.183 | 0.877 | 0.022 | 0.746 | Imputed   |
| rs10828976  | 10:18886390_T/C       | 0.193 | 0.651 | 1.158 | 1.021 | 1.315 | 0.023 | 0.982 | Imputed   |
| rs75689771  | 10:18749240_A/G       | 0.229 | 1.110 | 0.868 | 0.769 | 0.981 | 0.023 | 0.949 | Imputed   |
| rs144911456 | 10:18927439_C/T       | 0.005 | 1.000 | 0.378 | 0.163 | 0.876 | 0.023 | 0.728 | Imputed   |
| rs55761512  | 10:18750617_C/G       | 0.225 | 0.127 | 0.868 | 0.768 | 0.981 | 0.023 | 0.948 | Imputed   |
| rs57214109  | 10:18752519_T/G       | 0.570 | 0.286 | 0.884 | 0.794 | 0.984 | 0.024 | 0.909 | Imputed   |
| rs2357784   | 10:18347950_G/A       | 0.061 | 0.005 | 0.790 | 0.644 | 0.970 | 0.024 | 0.973 | Imputed   |
| rs184067968 | 10:18529765_C/A       | 0.065 | 0.691 | 0.787 | 0.638 | 0.969 | 0.024 | 0.944 | Imputed   |
| rs11012374  | 10:18340232_C/T       | 0.061 | 0.005 | 0.791 | 0.645 | 0.970 | 0.025 | 0.979 | Imputed   |
| rs7081972   | 10:18896035_T/C       | 0.192 | 0.650 | 1.155 | 1.018 | 1.309 | 0.025 | 1.000 | Genotyped |
| rs60864177  | 10:18788734_TA/T      | 0.362 | 0.000 | 1.138 | 1.016 | 1.275 | 0.025 | 0.836 | Imputed   |
| rs187642598 | 10:18753762_T/G       | 0.056 | 0.127 | 0.778 | 0.624 | 0.970 | 0.026 | 0.979 | Imputed   |
| 10:18752523 | 10:18752523_TG/T      | 0.743 | 0.204 | 0.874 | 0.776 | 0.984 | 0.026 | 0.927 | Imputed   |
| rs142055587 | 10:18752523_TG/T      | 0.743 | 0.204 | 0.874 | 0.776 | 0.984 | 0.026 | 0.927 | Imputed   |
| rs1547819   | 10:18379931_C/A       | 0.791 | 0.733 | 0.859 | 0.751 | 0.982 | 0.026 | 0.845 | Imputed   |
| rs34416277  | 10:18437024_T/A       | 0.368 | 0.023 | 0.890 | 0.803 | 0.986 | 0.026 | 0.979 | Imputed   |
| rs2482103   | 10:18479948_A/G       | 0.923 | 0.350 | 1.248 | 1.026 | 1.519 | 0.027 | 0.912 | Imputed   |
| rs10764322  | 10:18437061_A/G       | 0.371 | 0.027 | 0.890 | 0.804 | 0.987 | 0.027 | 0.983 | Imputed   |
| rs1892009   | 10:18480587_T/G       | 0.883 | 0.155 | 1.200 | 1.021 | 1.409 | 0.027 | 0.916 | Imputed   |
| rs2489211   | 10:18480276_G/C       | 0.921 | 0.350 | 1.247 | 1.025 | 1.518 | 0.028 | 0.886 | Imputed   |
| rs2482101   | 10:18480849_A/C       | 0.923 | 0.350 | 1.246 | 1.024 | 1.517 | 0.028 | 0.900 | Imputed   |
| rs138224274 | 10:18331179_T/A       | 0.056 | 0.119 | 0.777 | 0.619 | 0.974 | 0.029 | 0.910 | Imputed   |
| rs61839262  | 10:18742590_G/A       | 0.043 | 0.689 | 0.750 | 0.579 | 0.970 | 0.029 | 0.900 | Imputed   |
| rs10828267  | 10:18436328_T/C       | 0.373 | 0.030 | 0.892 | 0.804 | 0.988 | 0.029 | 0.982 | Imputed   |
| rs1779241   | 10:18476322_A/G       | 0.928 | 0.470 | 1.247 | 1.023 | 1.520 | 0.029 | 0.957 | Imputed   |
| rs1779204   | 10:18480727_A/C       | 0.922 | 0.350 | 1.245 | 1.023 | 1.515 | 0.029 | 0.899 | Imputed   |
| rs1757246   | 10:18480728_G/A       | 0.922 | 0.351 | 1.245 | 1.023 | 1.515 | 0.029 | 0.898 | Imputed   |
| rs201039853 | 10:18346820_C/CT      | 0.059 | 1.000 | 0.776 | 0.618 | 0.975 | 0.029 | 0.877 | Imputed   |
| rs74548180  | 10:18365876_C/T       | 0.243 | 0.004 | 1.140 | 1.013 | 1.283 | 0.029 | 0.934 | Imputed   |
| rs118042763 | 10:18660292_C/T       | 0.313 | 0.201 | 0.888 | 0.797 | 0.988 | 0.030 | 0.984 | Imputed   |
| rs77705610  | 10:18624826_A/T       | 0.080 | 0.825 | 0.807 | 0.665 | 0.980 | 0.030 | 0.907 | Imputed   |
| rs189327915 | 10:18438213_A/G       | 0.055 | 0.347 | 0.778 | 0.619 | 0.976 | 0.030 | 0.933 | Imputed   |
| rs4748478   | 10:18798590_G/A       | 0.327 | 0.335 | 1.127 | 1.011 | 1.256 | 0.030 | 0.984 | Imputed   |
| rs201779228 | 10:18578868_C/CTTTTA  | 0.015 | 0.538 | 1.606 | 1.045 | 2.470 | 0.031 | 0.895 | Imputed   |
| rs111393651 | 10:18383720_A/AT      | 0.061 | 0.868 | 0.767 | 0.602 | 0.976 | 0.031 | 0.758 | Imputed   |
| rs11012808  | 10:18437632_C/T       | 0.369 | 0.041 | 0.893 | 0.806 | 0.990 | 0.031 | 0.987 | Imputed   |
| rs56392041  | 10:18358517_C/T       | 0.239 | 0.004 | 1.139 | 1.012 | 1.283 | 0.032 | 0.933 | Imputed   |
| rs11014515  | 10:18788280_C/G       | 0.065 | 0.003 | 0.782 | 0.624 | 0.979 | 0.032 | 0.793 | Imputed   |
| rs12221045  | 10:18737344_C/T       | 0.689 | 0.237 | 0.887 | 0.795 | 0.990 | 0.032 | 0.992 | Imputed   |
| rs9645525   | 10:18620950_G/A       | 0.515 | 0.411 | 0.896 | 0.810 | 0.991 | 0.032 | 0.999 | Genotyped |
| rs10828711  | 10:18736836_C/T       | 0.689 | 0.237 | 0.887 | 0.796 | 0.990 | 0.032 | 0.993 | Imputed   |
| rs139142287 | 10:18772429_C/T       | 0.011 | 1.000 | 1.915 | 1.056 | 3.472 | 0.032 | 0.631 | Imputed   |
| rs11012811  | 10:18438456_G/T       | 0.369 | 0.048 | 0.894 | 0.807 | 0.991 | 0.032 | 0.988 | Imputed   |
| 10:18455071 | 10:18455071_CGTT/TGTT | 0.404 | 0.167 | 0.896 | 0.810 | 0.991 | 0.033 | 0.994 | Imputed   |
| rs117482742 | 10:18781803_A/G       | 0.016 | 1.000 | 1.719 | 1.045 | 2.829 | 0.033 | 0.651 | Imputed   |
| rs11592100  | 10:18439022_C/A       | 0.216 | 0.014 | 0.877 | 0.778 | 0.990 | 0.033 | 0.981 | Imputed   |
| 10:18850236 | 10:18850236_A/G       | 0.001 | 1.000 | 0.150 | 0.026 | 0.861 | 0.033 | 0.616 | Imputed   |
| rs191106518 | 10:18830376_C/T       | 0.007 | 0.212 | 2.134 | 1.061 | 4.291 | 0.033 | 0.754 | Imputed   |
| rs11015259  | 10:18925490_C/T       | 0.191 | 0.414 | 1.152 | 1.011 | 1.313 | 0.033 | 0.929 | Imputed   |
| rs61839258  | 10:18689638_G/T       | 0.232 | 0.964 | 0.877 | 0.777 | 0.990 | 0.034 | 0.973 | Imputed   |
| rs34029573  | 10:18615967_A/AT      | 0.184 | 0.051 | 1.161 | 1.011 | 1.333 | 0.034 | 0.867 | Imputed   |
| rs11591660  | 10:18432750_C/G       | 0.102 | 0.117 | 0.836 | 0.708 | 0.987 | 0.034 | 0.966 | Imputed   |
| rs4601659   | 10:18360422_G/C       | 0.251 | 0.001 | 1.133 | 1.009 | 1.273 | 0.035 | 0.937 | Imputed   |
| rs148278918 | 10:18429115_G/C       | 0.022 | 0.706 | 1.459 | 1.028 | 2.070 | 0.035 | 0.959 | Imputed   |
| rs7910846   | 10:18391102_A/C       | 0.328 | 0.115 | 0.887 | 0.793 | 0.992 | 0.035 | 0.900 | Imputed   |
| rs12254796  | 10:18653521_G/A       | 0.312 | 0.143 | 0.891 | 0.800 | 0.992 | 0.035 | 0.976 | Imputed   |
| rs117290940 | 10:18516686_T/G       | 0.017 | 0.074 | 1.521 | 1.029 | 2.249 | 0.036 | 0.898 | Imputed   |
| rs71402149  | 10:18460341_TC/T      | 0.327 | 0.044 | 0.893 | 0.804 | 0.993 | 0.036 | 0.991 | Imputed   |
| rs76117714  | 10:18679107_GA/G      | 0.231 | 0.787 | 0.876 | 0.774 | 0.991 | 0.036 | 0.944 | Imputed   |
| rs12764271  | 10:18429407_C/A       | 0.103 | 0.170 | 0.838 | 0.710 | 0.989 | 0.036 | 0.968 | Imputed   |
| rs7076319   | 10:18459450_A/G       | 0.328 | 0.016 | 0.894 | 0.804 | 0.993 | 0.036 | 0.988 | Imputed   |
| rs75858343  | 10:18832637_T/C       | 0.040 | 1.000 | 1.376 | 1.020 | 1.854 | 0.036 | 0.729 | Imputed   |
| rs12358488  | 10:18329835_G/A       | 0.085 | 0.043 | 0.830 | 0.696 | 0.989 | 0.037 | 0.999 | Genotyped |
| 10:18397809 | 10:18397809_A/G       | 0.143 | 0.000 | 0.847 | 0.724 | 0.991 | 0.039 | 0.838 | Imputed   |
| rs111678114 | 10:18397809_A/G       | 0.143 | 0.000 | 0.847 | 0.724 | 0.991 | 0.039 | 0.838 | Imputed   |
| rs61839224  | 10:18663147_G/A       | 0.043 | 0.693 | 1.319 | 1.014 | 1.715 | 0.039 | 0.862 | Imputed   |
| rs113955098 | 10:18591226_G/A       | 0.059 | 0.271 | 0.790 | 0.632 | 0.988 | 0.039 | 0.913 | Imputed   |
| rs28478337  | 10:18330752_G/A       | 0.085 | 0.055 | 0.832 | 0.697 | 0.991 | 0.040 | 0.993 | Imputed   |
| rs111287406 | 10:18577912_T/A       | 0.020 | 0.211 | 1.458 | 1.018 | 2.087 | 0.040 | 0.933 | Imputed   |
| rs17662228  | 10:18440398_A/G       | 0.104 | 0.200 | 0.843 | 0.716 | 0.993 | 0.041 | 0.986 | Imputed   |
| rs16917138  | 10:18564095_A/G       | 0.108 | 0.012 | 1.189 | 1.007 | 1.405 | 0.041 | 0.904 | Imputed   |
| rs10741083  | 10:18790858_T/C       | 0.324 | 0.691 | 1.123 | 1.005 | 1.254 | 0.041 | 0.942 | Imputed   |

## SUPPLEMENTARY DATA

|             |                         |       |       |       |       |        |       |       |           |
|-------------|-------------------------|-------|-------|-------|-------|--------|-------|-------|-----------|
| rs34418804  | 10:18427970_C/G         | 0.106 | 0.275 | 0.844 | 0.718 | 0.993  | 0.041 | 0.977 | Imputed   |
| rs71497235  | 10:18427770_C/A         | 0.106 | 0.275 | 0.844 | 0.718 | 0.993  | 0.041 | 0.977 | Imputed   |
| rs7076486   | 10:18363141_G/C         | 0.233 | 0.004 | 1.133 | 1.005 | 1.278  | 0.042 | 0.919 | Imputed   |
| rs16916794  | 10:18331480_A/T         | 0.085 | 0.055 | 0.833 | 0.699 | 0.993  | 0.042 | 0.993 | Imputed   |
| rs17611556  | 10:18671921_T/C         | 0.044 | 1.000 | 1.311 | 1.010 | 1.703  | 0.042 | 0.856 | Imputed   |
| rs35769984  | 10:18436542_A/G         | 0.104 | 0.200 | 0.844 | 0.717 | 0.994  | 0.043 | 0.981 | Imputed   |
| rs11591227  | 10:18436307_A/G         | 0.104 | 0.199 | 0.844 | 0.717 | 0.995  | 0.043 | 0.981 | Imputed   |
| rs61839227  | 10:18670685_G/A         | 0.043 | 1.000 | 1.311 | 1.009 | 1.704  | 0.043 | 0.862 | Imputed   |
| rs1277767   | 10:18498398_G/A         | 0.741 | 0.708 | 1.128 | 1.004 | 1.268  | 0.043 | 0.960 | Imputed   |
| rs76663952  | 10:18556883_A/T         | 0.091 | 0.053 | 1.207 | 1.006 | 1.449  | 0.043 | 0.881 | Imputed   |
| rs59493665  | 10:18508105_AAATACTTC/A | 0.060 | 0.113 | 0.804 | 0.649 | 0.995  | 0.045 | 0.942 | Imputed   |
| rs75865896  | 10:18363893_G/A         | 0.233 | 0.004 | 1.131 | 1.003 | 1.276  | 0.045 | 0.920 | Imputed   |
| rs117246203 | 10:18651747_G/A         | 0.163 | 0.908 | 0.870 | 0.759 | 0.997  | 0.045 | 0.976 | Imputed   |
| rs4293031   | 10:18695709_A/G         | 0.542 | 0.504 | 0.902 | 0.815 | 0.998  | 0.045 | 0.982 | Imputed   |
| rs12571593  | 10:18443222_A/G         | 0.103 | 0.267 | 0.846 | 0.718 | 0.996  | 0.045 | 0.988 | Imputed   |
| rs35410995  | 10:18443435_C/T         | 0.103 | 0.267 | 0.846 | 0.718 | 0.996  | 0.045 | 0.986 | Imputed   |
| rs35921882  | 10:18501292_GT/G        | 0.744 | 0.738 | 1.128 | 1.003 | 1.269  | 0.045 | 0.955 | Imputed   |
| rs34751078  | 10:18436645_A/AT        | 0.101 | 0.163 | 0.840 | 0.708 | 0.997  | 0.046 | 0.924 | Imputed   |
| rs72780072  | 10:18357740_G/C         | 0.018 | 0.370 | 0.675 | 0.459 | 0.993  | 0.046 | 0.942 | Imputed   |
| rs7092002   | 10:18624476_C/T         | 0.493 | 1.000 | 0.901 | 0.813 | 0.998  | 0.046 | 0.957 | Imputed   |
| rs12255637  | 10:18385568_C/T         | 0.472 | 0.000 | 1.115 | 1.002 | 1.241  | 0.047 | 0.870 | Imputed   |
| 10:18330464 | 10:18330464_T/C         | 0.027 | 0.742 | 0.695 | 0.486 | 0.995  | 0.047 | 0.742 | Imputed   |
| rs16917251  | 10:18681614_C/A         | 0.228 | 0.587 | 0.883 | 0.781 | 0.998  | 0.047 | 0.961 | Imputed   |
| rs12765240  | 10:18438372_C/T         | 0.104 | 0.266 | 0.847 | 0.719 | 0.998  | 0.047 | 0.984 | Imputed   |
| rs71497236  | 10:18446199_C/T         | 0.102 | 0.166 | 0.847 | 0.718 | 0.998  | 0.048 | 0.985 | Imputed   |
| rs79831892  | 10:18332363_A/G         | 0.049 | 0.271 | 1.313 | 1.002 | 1.719  | 0.048 | 0.725 | Imputed   |
| rs1277763   | 10:18495885_T/C         | 0.755 | 0.666 | 1.127 | 1.001 | 1.269  | 0.048 | 0.960 | Imputed   |
| rs67214975  | 10:18727251_C/A         | 0.443 | 0.631 | 0.902 | 0.813 | 1.000  | 0.049 | 0.973 | Imputed   |
| rs145329779 | 10:18435509_C/A         | 0.104 | 0.264 | 0.848 | 0.720 | 0.999  | 0.049 | 0.981 | Imputed   |
| rs61839259  | 10:18706099_C/T         | 0.082 | 0.034 | 1.213 | 1.001 | 1.471  | 0.049 | 0.889 | Imputed   |
| rs181739017 | 10:18796542_C/A         | 0.005 | 1.000 | 0.477 | 0.228 | 0.999  | 0.050 | 0.829 | Imputed   |
| rs112819895 | 10:18642107_G/T         | 0.081 | 1.000 | 0.827 | 0.683 | 1.000  | 0.050 | 0.927 | Imputed   |
| rs142187338 | 10:18629424_G/A         | 0.009 | 0.206 | 0.562 | 0.316 | 1.000  | 0.050 | 0.839 | Imputed   |
| rs77118008  | 10:18405529_T/C         | 0.158 | 0.275 | 1.150 | 1.000 | 1.324  | 0.051 | 0.945 | Imputed   |
| 10:18850094 | 10:18850094_C/T         | 0.008 | 0.262 | 1.868 | 0.995 | 3.505  | 0.052 | 0.755 | Imputed   |
| 10:18850088 | 10:18850088_G/GTA       | 0.008 | 0.262 | 1.868 | 0.995 | 3.505  | 0.052 | 0.755 | Imputed   |
| 10:18850092 | 10:18850092_T/TAGA      | 0.008 | 0.262 | 1.868 | 0.995 | 3.505  | 0.052 | 0.755 | Imputed   |
| rs1539680   | 10:18502889_G/C         | 0.755 | 0.830 | 1.123 | 0.999 | 1.262  | 0.053 | 0.985 | Imputed   |
| rs189706586 | 10:18574386_C/T         | 0.060 | 0.104 | 0.802 | 0.642 | 1.003  | 0.053 | 0.901 | Imputed   |
| rs188394974 | 10:18839844_G/A         | 0.005 | 1.000 | 0.484 | 0.232 | 1.009  | 0.053 | 0.859 | Imputed   |
| rs12262563  | 10:18658168_A/C         | 0.367 | 0.325 | 0.903 | 0.813 | 1.001  | 0.053 | 0.982 | Imputed   |
| rs11013890  | 10:18659376_A/G         | 0.368 | 0.325 | 0.902 | 0.813 | 1.001  | 0.053 | 0.980 | Imputed   |
| rs1650      | 10:18902802_G/A         | 0.061 | 0.549 | 1.256 | 0.996 | 1.584  | 0.054 | 0.822 | Imputed   |
| 10:18829485 | 10:18829485_T/TGTAA     | 0.016 | 0.602 | 0.662 | 0.436 | 1.007  | 0.054 | 0.884 | Imputed   |
| rs138617038 | 10:18838311_C/T         | 0.008 | 0.256 | 1.871 | 0.989 | 3.542  | 0.054 | 0.749 | Imputed   |
| rs75340843  | 10:18656138_ATTT/ATT    | 0.375 | 0.112 | 0.902 | 0.812 | 1.002  | 0.055 | 0.952 | Imputed   |
| rs80119850  | 10:18646272_C/G         | 0.044 | 0.848 | 1.291 | 0.995 | 1.675  | 0.055 | 0.866 | Imputed   |
| rs10764329  | 10:18450581_G/C         | 0.506 | 0.107 | 0.908 | 0.822 | 1.002  | 0.055 | 0.996 | Imputed   |
| rs34295748  | 10:18470126_A/G         | 0.070 | 0.806 | 0.825 | 0.677 | 1.005  | 0.056 | 0.986 | Imputed   |
| rs17605553  | 10:18470393_A/G         | 0.070 | 0.806 | 0.824 | 0.677 | 1.005  | 0.056 | 0.985 | Imputed   |
| rs12569914  | 10:18469522_C/T         | 0.070 | 0.806 | 0.825 | 0.677 | 1.005  | 0.056 | 0.986 | Imputed   |
| rs144272932 | 10:18776690_C/G         | 0.011 | 0.282 | 1.712 | 0.985 | 2.975  | 0.056 | 0.721 | Imputed   |
| rs11591541  | 10:18421314_A/G         | 0.226 | 0.856 | 0.890 | 0.789 | 1.003  | 0.056 | 0.991 | Imputed   |
| rs10828143  | 10:18338262_T/C         | 0.178 | 0.091 | 0.878 | 0.769 | 1.004  | 0.057 | 0.941 | Imputed   |
| rs7090118   | 10:18459282_G/A         | 0.413 | 0.282 | 0.907 | 0.820 | 1.003  | 0.057 | 1.000 | Genotyped |
| rs45587935  | 10:18897252_TTC/T       | 0.250 | 0.168 | 1.122 | 0.997 | 1.263  | 0.057 | 0.935 | Imputed   |
| rs199661449 | 10:18795615_C/T         | 0.179 | 0.125 | 1.137 | 0.996 | 1.298  | 0.057 | 0.946 | Imputed   |
| rs2183719   | 10:18454042_A/T         | 0.505 | 0.206 | 0.908 | 0.823 | 1.003  | 0.057 | 0.996 | Imputed   |
| rs201674247 | 10:18795614_G/C         | 0.179 | 0.125 | 1.137 | 0.996 | 1.298  | 0.057 | 0.945 | Imputed   |
| rs200669965 | 10:18795613_T/A         | 0.179 | 0.124 | 1.137 | 0.996 | 1.298  | 0.057 | 0.945 | Imputed   |
| 10:18915287 | 10:18915287_G/A         | 0.002 | 1.000 | 3.141 | 0.965 | 10.231 | 0.057 | 0.805 | Imputed   |
| rs10764625  | 10:18898434_T/C         | 0.250 | 0.143 | 1.122 | 0.996 | 1.263  | 0.058 | 0.933 | Imputed   |
| rs1857424   | 10:18479147_A/G         | 0.691 | 0.249 | 1.113 | 0.996 | 1.244  | 0.058 | 0.941 | Imputed   |
| rs1618660   | 10:18479094_G/C         | 0.691 | 0.249 | 1.113 | 0.996 | 1.243  | 0.058 | 0.941 | Imputed   |
| 10:18494015 | 10:18494015_TA/T        | 0.799 | 0.426 | 1.131 | 0.996 | 1.284  | 0.058 | 0.958 | Imputed   |
| rs55729747  | 10:18494015_TA/T        | 0.799 | 0.426 | 1.131 | 0.996 | 1.284  | 0.058 | 0.958 | Imputed   |
| rs185911806 | 10:18415881_G/A         | 0.002 | 1.000 | 4.515 | 0.947 | 21.524 | 0.058 | 0.605 | Imputed   |
| rs79845832  | 10:18581049_G/A         | 0.014 | 1.000 | 1.604 | 0.983 | 2.619  | 0.059 | 0.765 | Imputed   |
| rs185232525 | 10:18835979_C/G         | 0.040 | 0.009 | 0.757 | 0.567 | 1.011  | 0.059 | 0.781 | Imputed   |
| rs16917244  | 10:18675097_C/T         | 0.225 | 0.335 | 0.888 | 0.785 | 1.005  | 0.059 | 0.952 | Imputed   |
| rs185692464 | 10:18793854_G/A         | 0.002 | 1.000 | 3.158 | 0.957 | 10.425 | 0.059 | 0.764 | Imputed   |
| rs7911082   | 10:18509220_A/G         | 0.114 | 0.207 | 0.859 | 0.733 | 1.006  | 0.060 | 0.961 | Imputed   |
| rs192590130 | 10:18340927_G/A         | 0.067 | 0.276 | 0.817 | 0.661 | 1.008  | 0.060 | 0.894 | Imputed   |
| rs183692822 | 10:18788414_C/G         | 0.003 | 1.000 | 0.355 | 0.121 | 1.045  | 0.060 | 0.681 | Imputed   |
| rs4748442   | 10:18399519_C/T         | 0.539 | 0.002 | 1.106 | 0.996 | 1.229  | 0.060 | 0.895 | Imputed   |
| rs1106380   | 10:18549115_A/G         | 0.213 | 0.000 | 1.134 | 0.995 | 1.292  | 0.060 | 0.850 | Imputed   |
| rs34074414  | 10:18467874_T/C         | 0.068 | 0.802 | 0.826 | 0.676 | 1.009  | 0.061 | 0.985 | Imputed   |
| rs35118097  | 10:18470137_G/A         | 0.089 | 0.617 | 0.843 | 0.705 | 1.008  | 0.061 | 0.973 | Imputed   |
| rs7915367   | 10:18509456_T/G         | 0.114 | 0.207 | 0.860 | 0.734 | 1.007  | 0.061 | 0.962 | Imputed   |
| rs78219843  | 10:18556091_G/T         | 0.027 | 0.362 | 1.349 | 0.986 | 1.846  | 0.061 | 0.940 | Imputed   |
| rs10764327  | 10:18448848_G/T         | 0.506 | 0.100 | 0.910 | 0.824 | 1.005  | 0.062 | 0.994 | Imputed   |
| rs7924114   | 10:18509461_G/T         | 0.114 | 0.180 | 0.860 | 0.734 | 1.007  | 0.062 | 0.963 | Imputed   |
| 10:18845253 | 10:18845253_G/A         | 0.005 | 1.000 | 0.502 | 0.244 | 1.035  | 0.062 | 0.889 | Imputed   |
| rs10741090  | 10:18795845_C/T         | 0.323 | 0.315 | 1.110 | 0.995 | 1.238  | 0.062 | 0.966 | Imputed   |
| rs35667846  | 10:18464913_G/A         | 0.068 | 0.801 | 0.827 | 0.677 | 1.011  | 0.063 | 0.984 | Imputed   |
| rs10764331  | 10:18451836_A/G         | 0.503 | 0.174 | 0.911 | 0.825 | 1.005  | 0.063 | 0.998 | Imputed   |
| rs78697157  | 10:18564366_A/T         | 0.016 | 0.570 | 1.496 | 0.978 | 2.291  | 0.063 | 0.881 | Imputed   |
| rs10764332  | 10:18451969_A/C         | 0.503 | 0.174 | 0.911 | 0.825 | 1.005  | 0.064 | 0.998 | Imputed   |
| rs10740996  | 10:18448109_T/C         | 0.504 | 0.121 | 0.911 | 0.825 | 1.005  | 0.064 | 0.995 | Imputed   |
| rs10764326  | 10:18448062_T/C         | 0.504 | 0.121 | 0.911 | 0.825 | 1.005  | 0.064 | 0.995 | Imputed   |
| rs12776808  | 10:18463389_A/G         | 0.068 | 0.800 | 0.828 | 0.678 | 1.011  | 0.064 | 0.984 | Imputed   |
| rs1013232   | 10:18609325_C/T         | 0.508 | 0.206 | 0.905 | 0.814 | 1.006  | 0.064 | 0.905 | Imputed   |

## SUPPLEMENTARY DATA

|             |                           |       |       |       |       |        |       |       |           |
|-------------|---------------------------|-------|-------|-------|-------|--------|-------|-------|-----------|
| rs72786097  | 10:18728998_T/G           | 0.210 | 0.145 | 0.889 | 0.785 | 1.007  | 0.064 | 0.962 | Imputed   |
| rs2183718   | 10:18454472_A/G           | 0.505 | 0.195 | 0.911 | 0.825 | 1.005  | 0.064 | 0.996 | Imputed   |
| rs12766683  | 10:18463166_C/T           | 0.068 | 0.800 | 0.828 | 0.678 | 1.011  | 0.064 | 0.984 | Imputed   |
| rs2357785   | 10:18348038_A/C           | 0.022 | 0.133 | 0.726 | 0.517 | 1.019  | 0.064 | 0.958 | Imputed   |
| rs183813069 | 10:18631172_A/G           | 0.002 | 1.000 | 3.575 | 0.922 | 13.870 | 0.065 | 0.852 | Imputed   |
| rs71491145  | 10:18460336_G/A           | 0.068 | 0.317 | 0.829 | 0.680 | 1.012  | 0.066 | 0.986 | Imputed   |
| rs10764340  | 10:18509757_G/A           | 0.114 | 0.180 | 0.862 | 0.736 | 1.010  | 0.066 | 0.967 | Imputed   |
| rs1779237   | 10:18475947_C/T           | 0.692 | 0.435 | 1.108 | 0.993 | 1.237  | 0.066 | 0.958 | Imputed   |
| rs111827557 | 10:18727095_C/T           | 0.219 | 0.925 | 0.891 | 0.787 | 1.008  | 0.066 | 0.974 | Imputed   |
| rs55812855  | 10:18508701_ATT/A         | 0.118 | 0.134 | 0.862 | 0.736 | 1.010  | 0.066 | 0.933 | Imputed   |
| rs72780097  | 10:18399525_G/T           | 0.019 | 0.652 | 0.708 | 0.490 | 1.024  | 0.066 | 0.989 | Imputed   |
| rs12764916  | 10:18799224_C/T           | 0.321 | 0.450 | 1.108 | 0.993 | 1.236  | 0.066 | 0.971 | Imputed   |
| rs10828280  | 10:18449355_G/T           | 0.503 | 0.174 | 0.912 | 0.826 | 1.006  | 0.067 | 0.997 | Imputed   |
| rs34537345  | 10:18458587_A/G           | 0.069 | 0.382 | 0.830 | 0.680 | 1.013  | 0.067 | 0.986 | Imputed   |
| 10:18856087 | 10:18856087_C/T           | 0.006 | 1.000 | 0.504 | 0.242 | 1.049  | 0.067 | 0.823 | Imputed   |
| rs10828983  | 10:18889313_A/G           | 0.252 | 0.201 | 1.117 | 0.992 | 1.257  | 0.067 | 0.936 | Imputed   |
| rs10128211  | 10:18509931_G/A           | 0.114 | 0.180 | 0.863 | 0.737 | 1.011  | 0.068 | 0.969 | Imputed   |
| rs7081461   | 10:18900925_G/A           | 0.250 | 0.155 | 1.117 | 0.992 | 1.258  | 0.068 | 0.928 | Imputed   |
| rs35803482  | 10:18505523_T/A           | 0.757 | 0.830 | 1.115 | 0.992 | 1.253  | 0.068 | 0.997 | Imputed   |
| rs182300527 | 10:18893515_C/T           | 0.040 | 0.002 | 0.765 | 0.573 | 1.020  | 0.068 | 0.781 | Imputed   |
| rs4748448   | 10:18594604_C/T           | 0.649 | 0.001 | 0.899 | 0.801 | 1.008  | 0.068 | 0.842 | Imputed   |
| rs1277729   | 10:18482691_T/C           | 0.777 | 0.261 | 1.123 | 0.991 | 1.273  | 0.069 | 0.917 | Imputed   |
| rs78834161  | 10:18579322_A/T           | 0.027 | 0.366 | 1.336 | 0.978 | 1.827  | 0.069 | 0.940 | Imputed   |
| rs141673071 | 10:18458122_A/AT          | 0.361 | 0.069 | 0.909 | 0.820 | 1.008  | 0.069 | 0.989 | Imputed   |
| rs139658760 | 10:18911231_G/A           | 0.016 | 0.627 | 0.672 | 0.438 | 1.033  | 0.070 | 0.845 | Imputed   |
| rs16916821  | 10:18348954_C/G           | 0.026 | 0.114 | 0.726 | 0.514 | 1.026  | 0.070 | 0.801 | Imputed   |
| rs11421435  | 10:18786137_T/A           | 0.328 | 0.000 | 1.112 | 0.991 | 1.246  | 0.070 | 0.853 | Imputed   |
| rs11281154  | 10:18682116_T/TGACAGAGTGA | 0.798 | 0.176 | 0.881 | 0.767 | 1.010  | 0.070 | 0.848 | Imputed   |
| rs11014316  | 10:18745581_T/C           | 0.699 | 0.970 | 0.903 | 0.809 | 1.008  | 0.070 | 0.979 | Imputed   |
| rs11015077  | 10:18889744_C/A           | 0.254 | 0.115 | 1.116 | 0.991 | 1.256  | 0.070 | 0.931 | Imputed   |
| rs1411930   | 10:18558798_T/C           | 0.198 | 0.767 | 1.123 | 0.991 | 1.273  | 0.070 | 0.998 | Imputed   |
| rs117352681 | 10:18572281_G/T           | 0.027 | 0.366 | 1.335 | 0.976 | 1.824  | 0.070 | 0.941 | Imputed   |
| rs78346318  | 10:18679578_A/AT          | 0.253 | 0.475 | 0.896 | 0.795 | 1.009  | 0.070 | 0.951 | Imputed   |
| rs1411929   | 10:18558867_T/C           | 0.198 | 0.767 | 1.123 | 0.990 | 1.273  | 0.070 | 0.999 | Genotyped |
| rs138691427 | 10:18891495_C/C/A         | 0.254 | 0.136 | 1.115 | 0.991 | 1.255  | 0.071 | 0.932 | Imputed   |
| rs188998753 | 10:18906389_T/C           | 0.040 | 0.003 | 0.766 | 0.574 | 1.023  | 0.071 | 0.781 | Imputed   |
| rs113131914 | 10:18892861_C/T           | 0.254 | 0.147 | 1.115 | 0.991 | 1.255  | 0.071 | 0.933 | Imputed   |
| rs7477076   | 10:18893108_A/G           | 0.254 | 0.147 | 1.115 | 0.991 | 1.255  | 0.071 | 0.933 | Imputed   |
| rs11015105  | 10:18893955_T/C           | 0.254 | 0.216 | 1.115 | 0.991 | 1.255  | 0.071 | 0.934 | Imputed   |
| rs2209588   | 10:18717884_A/T           | 0.847 | 0.462 | 0.878 | 0.762 | 1.011  | 0.071 | 0.987 | Imputed   |
| rs145064010 | 10:18389409_CTG/C         | 0.071 | 0.755 | 1.240 | 0.982 | 1.567  | 0.071 | 0.688 | Imputed   |
| rs2209587   | 10:18717909_T/C           | 0.847 | 0.462 | 0.878 | 0.762 | 1.011  | 0.071 | 0.986 | Imputed   |
| rs11013933  | 10:18668503_A/G           | 0.371 | 0.361 | 0.909 | 0.820 | 1.008  | 0.071 | 0.991 | Imputed   |
| rs4748439   | 10:18346744_G/A           | 0.022 | 0.129 | 0.734 | 0.524 | 1.027  | 0.071 | 0.976 | Imputed   |
| rs148546670 | 10:18894299_A/AG          | 0.253 | 0.216 | 1.115 | 0.991 | 1.255  | 0.072 | 0.934 | Imputed   |
| rs10828165  | 10:18349535_A/G           | 0.207 | 0.004 | 0.889 | 0.781 | 1.011  | 0.072 | 0.889 | Imputed   |
| 10:18457426 | 10:18457426_T/TTGTG       | 0.322 | 0.007 | 0.908 | 0.817 | 1.009  | 0.073 | 0.989 | Imputed   |
| rs111401264 | 10:18457426_T/TTGTG       | 0.322 | 0.007 | 0.908 | 0.817 | 1.009  | 0.073 | 0.989 | Imputed   |
| rs34093563  | 10:18505525_GT/G          | 0.757 | 0.796 | 1.113 | 0.990 | 1.251  | 0.073 | 0.996 | Imputed   |
| rs11598236  | 10:18451884_T/C           | 0.071 | 0.544 | 0.836 | 0.688 | 1.017  | 0.073 | 0.991 | Imputed   |
| rs35268452  | 10:18674700_C/CT          | 0.229 | 0.387 | 0.894 | 0.791 | 1.011  | 0.074 | 0.952 | Imputed   |
| rs5022622   | 10:18895544_G/T           | 0.256 | 0.097 | 1.114 | 0.990 | 1.254  | 0.074 | 0.923 | Imputed   |
| rs77356072  | 10:18340956_C/A           | 0.022 | 0.129 | 0.736 | 0.526 | 1.030  | 0.074 | 0.969 | Imputed   |
| rs117930047 | 10:18676440_T/C           | 0.007 | 0.012 | 1.731 | 0.949 | 3.159  | 0.074 | 0.820 | Imputed   |
| rs11012368  | 10:18338330_T/G           | 0.047 | 0.855 | 0.801 | 0.629 | 1.022  | 0.074 | 0.955 | Imputed   |
| rs77131414  | 10:18341934_T/C           | 0.046 | 0.855 | 0.801 | 0.628 | 1.022  | 0.074 | 0.955 | Imputed   |
| rs75032518  | 10:18340079_A/G           | 0.022 | 0.129 | 0.736 | 0.526 | 1.030  | 0.074 | 0.967 | Imputed   |
| 10:18892212 | 10:18892212_A/C           | 0.006 | 1.000 | 0.522 | 0.256 | 1.065  | 0.074 | 0.833 | Imputed   |
| rs12269078  | 10:18344860_G/A           | 0.022 | 0.129 | 0.737 | 0.528 | 1.030  | 0.074 | 0.994 | Genotyped |
| rs72780046  | 10:18339632_A/G           | 0.046 | 0.855 | 0.801 | 0.628 | 1.022  | 0.074 | 0.958 | Imputed   |
| 10:18896262 | 10:18896262_T/C           | 0.006 | 1.000 | 0.523 | 0.256 | 1.066  | 0.074 | 0.833 | Imputed   |
| rs78323796  | 10:18343333_G/T           | 0.022 | 0.129 | 0.737 | 0.527 | 1.031  | 0.074 | 0.987 | Imputed   |
| rs10764512  | 10:18745202_A/C           | 0.698 | 0.970 | 0.905 | 0.811 | 1.010  | 0.074 | 0.983 | Imputed   |
| rs4748443   | 10:18399663_G/C           | 0.513 | 0.003 | 1.100 | 0.991 | 1.222  | 0.075 | 0.900 | Imputed   |
| rs11014185  | 10:18714347_T/A           | 0.841 | 0.137 | 0.881 | 0.766 | 1.013  | 0.075 | 0.988 | Imputed   |
| rs185795265 | 10:18401041_C/A           | 0.006 | 1.000 | 0.534 | 0.268 | 1.065  | 0.075 | 0.960 | Imputed   |
| rs5783587   | 10:18505062_TA/T          | 0.754 | 0.265 | 1.114 | 0.989 | 1.254  | 0.075 | 0.956 | Imputed   |
| rs150680927 | 10:18731838_AAT/A         | 0.303 | 0.793 | 1.104 | 0.990 | 1.231  | 0.076 | 0.986 | Imputed   |
| rs2489206   | 10:18505813_A/G           | 0.757 | 0.796 | 1.112 | 0.989 | 1.249  | 0.076 | 0.998 | Imputed   |
| rs1277765   | 10:18497295_C/T           | 0.804 | 0.421 | 1.122 | 0.988 | 1.275  | 0.076 | 0.968 | Imputed   |
| 10:18917656 | 10:18917656_G/A           | 0.006 | 1.000 | 0.526 | 0.259 | 1.070  | 0.076 | 0.833 | Imputed   |
| rs4747344   | 10:18671971_C/T           | 0.396 | 0.468 | 0.912 | 0.824 | 1.010  | 0.076 | 0.999 | Genotyped |
| rs2489205   | 10:18505899_A/G           | 0.757 | 0.796 | 1.111 | 0.989 | 1.249  | 0.077 | 0.999 | Imputed   |
| 10:18633315 | 10:18633315_T/C           | 0.008 | 0.016 | 1.689 | 0.946 | 3.016  | 0.077 | 0.801 | Imputed   |
| rs2026323   | 10:18508406_C/A           | 0.118 | 0.069 | 0.866 | 0.739 | 1.016  | 0.077 | 0.930 | Imputed   |
| 10:18925333 | 10:18925333_T/C           | 0.006 | 1.000 | 0.527 | 0.259 | 1.071  | 0.077 | 0.833 | Imputed   |
| rs2482118   | 10:18505962_G/C           | 0.757 | 0.796 | 1.111 | 0.989 | 1.249  | 0.077 | 0.999 | Imputed   |
| rs61844177  | 10:18460822_T/C           | 0.355 | 0.067 | 0.911 | 0.821 | 1.010  | 0.077 | 0.990 | Imputed   |
| rs2026324   | 10:18508424_C/G           | 0.117 | 0.069 | 0.867 | 0.739 | 1.016  | 0.078 | 0.931 | Imputed   |
| rs2482117   | 10:18506017_T/C           | 0.757 | 0.796 | 1.111 | 0.988 | 1.248  | 0.078 | 1.000 | Genotyped |
| rs61841999  | 10:18725848_G/A           | 0.237 | 0.219 | 1.112 | 0.988 | 1.252  | 0.078 | 0.976 | Imputed   |
| rs2488160   | 10:18372418_T/C           | 0.436 | 0.006 | 0.911 | 0.822 | 1.011  | 0.078 | 0.922 | Imputed   |
| rs11817136  | 10:18718611_C/A           | 0.810 | 0.117 | 0.888 | 0.777 | 1.014  | 0.079 | 0.945 | Imputed   |
| rs117292821 | 10:18341030_G/T           | 0.016 | 0.538 | 1.503 | 0.953 | 2.369  | 0.079 | 0.770 | Imputed   |
| rs1277762   | 10:18494666_C/T           | 0.803 | 0.582 | 1.121 | 0.987 | 1.274  | 0.080 | 0.961 | Imputed   |
| rs61841998  | 10:18721381_G/C           | 0.038 | 0.275 | 1.292 | 0.969 | 1.723  | 0.081 | 0.814 | Imputed   |
| rs11012398  | 10:18344047_G/A           | 0.046 | 0.854 | 0.804 | 0.629 | 1.027  | 0.081 | 0.957 | Imputed   |
| rs4748451   | 10:18635090_G/A           | 0.328 | 0.037 | 0.908 | 0.815 | 1.012  | 0.081 | 0.952 | Imputed   |
| rs11012397  | 10:18344012_C/T           | 0.046 | 0.854 | 0.804 | 0.629 | 1.027  | 0.081 | 0.957 | Imputed   |
| rs144784543 | 10:18344360_C/C/A         | 0.046 | 0.854 | 0.804 | 0.629 | 1.027  | 0.081 | 0.956 | Imputed   |
| rs11012396  | 10:18343796_G/A           | 0.046 | 0.854 | 0.804 | 0.629 | 1.027  | 0.081 | 0.954 | Imputed   |
| rs4748452   | 10:18635187_G/T           | 0.328 | 0.033 | 0.908 | 0.815 | 1.012  | 0.081 | 0.951 | Imputed   |

## SUPPLEMENTARY DATA

|                             |                          |       |       |       |       |        |       |       |           |
|-----------------------------|--------------------------|-------|-------|-------|-------|--------|-------|-------|-----------|
| rs79112655                  | 10:18727018_T/C          | 0.217 | 0.963 | 0.896 | 0.792 | 1.014  | 0.081 | 0.979 | Imputed   |
| rs148862619                 | 10:18497780_G/A          | 0.013 | 1.000 | 0.672 | 0.430 | 1.051  | 0.081 | 0.950 | Imputed   |
| rs75707741                  | 10:18726998_A/G          | 0.217 | 0.963 | 0.896 | 0.792 | 1.014  | 0.081 | 0.979 | Imputed   |
| rs7901587                   | 10:18407957_C/T          | 0.195 | 0.880 | 0.894 | 0.787 | 1.014  | 0.082 | 0.993 | Imputed   |
| rs11012386                  | 10:18342335_G/A          | 0.046 | 0.854 | 0.805 | 0.630 | 1.028  | 0.082 | 0.960 | Imputed   |
| rs143255379                 | 10:18342431_C/CT         | 0.046 | 0.854 | 0.805 | 0.630 | 1.028  | 0.082 | 0.959 | Imputed   |
| rs77231822                  | 10:18726284_A/AC         | 0.217 | 1.000 | 0.896 | 0.792 | 1.014  | 0.082 | 0.979 | Imputed   |
| rs117767283                 | 10:18347055_G/A          | 0.046 | 0.854 | 0.804 | 0.629 | 1.028  | 0.082 | 0.949 | Imputed   |
| rs201072938                 | 10:18660892_G/A          | 0.217 | 0.926 | 0.898 | 0.794 | 1.014  | 0.083 | 0.987 | Imputed   |
| rs68101548                  | 10:18722053_GAT/G        | 0.775 | 1.000 | 0.897 | 0.793 | 1.014  | 0.083 | 0.961 | Imputed   |
| rs75634864                  | 10:18729592_TG/T         | 0.160 | 0.905 | 0.884 | 0.769 | 1.016  | 0.083 | 0.967 | Imputed   |
| rs75582385                  | 10:18405325_A/G          | 0.077 | 0.161 | 1.223 | 0.973 | 1.536  | 0.084 | 0.672 | Imputed   |
| rs188988331                 | 10:18917272_A/G          | 0.006 | 1.000 | 1.999 | 0.910 | 4.390  | 0.084 | 0.603 | Imputed   |
| rs34841750                  | 10:18347878_GA/G         | 0.114 | 0.001 | 0.849 | 0.706 | 1.023  | 0.085 | 0.685 | Imputed   |
| rs113390901                 | 10:18441739_A/T          | 0.086 | 0.690 | 1.171 | 0.978 | 1.402  | 0.086 | 0.965 | Imputed   |
| rs11014216                  | 10:18723867_A/C          | 0.269 | 0.746 | 0.905 | 0.807 | 1.014  | 0.086 | 0.976 | Imputed   |
| rs11014026                  | 10:18683342_T/C          | 0.247 | 0.493 | 0.901 | 0.800 | 1.015  | 0.087 | 0.971 | Imputed   |
| rs10828295                  | 10:18466094_A/G          | 0.210 | 0.008 | 0.899 | 0.796 | 1.016  | 0.087 | 0.982 | Imputed   |
| rs61839231                  | 10:18681496_A/G          | 0.246 | 0.576 | 0.901 | 0.799 | 1.015  | 0.087 | 0.961 | Imputed   |
| rs7894616                   | 10:18650354_G/T          | 0.235 | 0.186 | 1.109 | 0.985 | 1.249  | 0.088 | 0.973 | Imputed   |
| rs11285102                  | 10:18706129_A/T/A        | 0.854 | 0.112 | 0.881 | 0.762 | 1.019  | 0.089 | 0.976 | Imputed   |
| rs1419251                   | 10:18591562_G/C          | 0.621 | 0.000 | 0.908 | 0.812 | 1.015  | 0.089 | 0.842 | Imputed   |
| rs10828679                  | 10:18711288_G/A          | 0.850 | 0.081 | 0.884 | 0.766 | 1.019  | 0.089 | 0.993 | Imputed   |
| rs34804937                  | 10:18714456_CA/C         | 0.848 | 0.084 | 0.884 | 0.767 | 1.019  | 0.090 | 0.994 | Imputed   |
| rs11014186                  | 10:18714473_A/T          | 0.848 | 0.084 | 0.884 | 0.767 | 1.019  | 0.090 | 0.994 | Imputed   |
| rs74593582                  | 10:18374059_T/C          | 0.018 | 0.001 | 0.687 | 0.445 | 1.060  | 0.090 | 0.721 | Imputed   |
| rs58368348                  | 10:18712069_C/CTTACCTGTT | 0.850 | 0.081 | 0.884 | 0.767 | 1.019  | 0.090 | 0.994 | Imputed   |
| rs139079279                 | 10:18487579_C/A          | 0.015 | 0.485 | 0.683 | 0.440 | 1.061  | 0.090 | 0.795 | Imputed   |
| rs11014167                  | 10:18710168_T/C          | 0.849 | 0.107 | 0.884 | 0.767 | 1.019  | 0.090 | 0.987 | Imputed   |
| rs35581650                  | 10:18385391_AG/A         | 0.158 | 0.856 | 0.886 | 0.769 | 1.019  | 0.090 | 0.960 | Imputed   |
| rs7080195                   | 10:18459147_T/C          | 0.516 | 0.242 | 0.918 | 0.831 | 1.014  | 0.090 | 0.996 | Imputed   |
| rs79530339                  | 10:18483664_A/G          | 0.010 | 1.000 | 0.627 | 0.365 | 1.077  | 0.091 | 0.844 | Imputed   |
| rs17690724                  | 10:18701804_C/T          | 0.143 | 0.363 | 1.136 | 0.980 | 1.317  | 0.091 | 0.961 | Imputed   |
| rs76540484                  | 10:18672644_GT/G         | 0.400 | 0.357 | 0.916 | 0.828 | 1.014  | 0.091 | 0.994 | Imputed   |
| rs377528399                 | 10:18430596_GGTTTTTAC/G  | 0.119 | 0.195 | 0.875 | 0.749 | 1.022  | 0.092 | 0.971 | Imputed   |
| rs4748465                   | 10:18712393_G/A          | 0.850 | 0.081 | 0.885 | 0.767 | 1.020  | 0.092 | 0.997 | Imputed   |
| rs7101133                   | 10:18900130_T/A          | 0.250 | 0.265 | 1.108 | 0.983 | 1.248  | 0.092 | 0.928 | Imputed   |
| rs7101134                   | 10:18900131_T/A          | 0.250 | 0.265 | 1.108 | 0.983 | 1.248  | 0.092 | 0.927 | Imputed   |
| rs138815826                 | 10:18860546_C/G          | 0.020 | 1.000 | 0.711 | 0.477 | 1.058  | 0.092 | 0.792 | Imputed   |
| rs983048                    | 10:18710698_T/C          | 0.849 | 0.121 | 0.885 | 0.768 | 1.021  | 0.093 | 0.989 | Imputed   |
| rs72109948                  | 10:18430507_GTGTGTT/G    | 0.119 | 0.195 | 0.876 | 0.750 | 1.023  | 0.093 | 0.976 | Imputed   |
| rs2209590                   | 10:18717682_A/G          | 0.850 | 0.134 | 0.885 | 0.767 | 1.021  | 0.094 | 0.989 | Imputed   |
| rs12572321                  | 10:18430220_G/A          | 0.119 | 0.195 | 0.876 | 0.750 | 1.023  | 0.094 | 0.976 | Imputed   |
| rs2209589                   | 10:18717819_T/C          | 0.850 | 0.134 | 0.885 | 0.767 | 1.021  | 0.094 | 0.989 | Imputed   |
| rs58561149                  | 10:18717945_A/T          | 0.851 | 0.134 | 0.885 | 0.767 | 1.021  | 0.094 | 0.988 | Imputed   |
| rs11014196                  | 10:18718137_A/G          | 0.850 | 0.134 | 0.885 | 0.767 | 1.021  | 0.094 | 0.989 | Imputed   |
| rs36045774                  | 10:18430866_A/T          | 0.119 | 0.195 | 0.876 | 0.751 | 1.023  | 0.094 | 0.976 | Imputed   |
| 10:18731421                 | 10:18731421_C/CT         | 0.053 | 0.110 | 0.810 | 0.634 | 1.037  | 0.094 | 0.817 | Imputed   |
| rs7912753                   | 10:18709580_T/C          | 0.849 | 0.121 | 0.885 | 0.768 | 1.021  | 0.094 | 0.986 | Imputed   |
| rs72294880                  | 10:18624695_CTTGT/C      | 0.543 | 0.567 | 0.916 | 0.826 | 1.015  | 0.095 | 0.952 | Imputed   |
| rs61840849                  | 10:18909495_T/C          | 0.082 | 0.001 | 0.843 | 0.690 | 1.030  | 0.095 | 0.798 | Imputed   |
| rs2489194                   | 10:18637864_A/G          | 0.759 | 0.402 | 0.901 | 0.798 | 1.018  | 0.095 | 0.924 | Imputed   |
| rs61840850                  | 10:18909805_T/C          | 0.082 | 0.001 | 0.843 | 0.690 | 1.030  | 0.095 | 0.797 | Imputed   |
| rs75361292                  | 10:18405826_G/T          | 0.086 | 0.313 | 1.170 | 0.973 | 1.406  | 0.095 | 0.951 | Imputed   |
| rs11333043                  | 10:18710157_AT/A         | 0.849 | 0.107 | 0.886 | 0.768 | 1.021  | 0.095 | 0.986 | Imputed   |
| rs138488415                 | 10:18824436_T/C          | 0.012 | 0.067 | 1.565 | 0.924 | 2.650  | 0.096 | 0.696 | Imputed   |
| rs10741059                  | 10:18720877_G/A          | 0.849 | 0.171 | 0.886 | 0.768 | 1.022  | 0.096 | 0.987 | Imputed   |
| rs10734054                  | 10:18721065_A/G          | 0.849 | 0.171 | 0.886 | 0.768 | 1.022  | 0.096 | 0.987 | Imputed   |
| rs10741060                  | 10:18721071_G/A          | 0.849 | 0.171 | 0.886 | 0.768 | 1.022  | 0.096 | 0.987 | Imputed   |
| rs10741061                  | 10:18721204_A/G          | 0.849 | 0.171 | 0.886 | 0.769 | 1.022  | 0.096 | 0.987 | Imputed   |
| rs55907160                  | 10:18624869_C/CT         | 0.543 | 0.567 | 0.916 | 0.827 | 1.016  | 0.096 | 0.951 | Imputed   |
| rs72780053                  | 10:18346837_A/G          | 0.381 | 0.010 | 1.090 | 0.985 | 1.206  | 0.097 | 0.992 | Imputed   |
| rs11427720                  | 10:18708285_G/GC         | 0.850 | 0.121 | 0.886 | 0.768 | 1.022  | 0.097 | 0.982 | Imputed   |
| rs10828533                  | 10:18625195_A/G          | 0.529 | 0.704 | 0.917 | 0.828 | 1.016  | 0.097 | 0.956 | Imputed   |
| rs35620050                  | 10:18747751_A/G          | 0.656 | 0.399 | 0.913 | 0.820 | 1.017  | 0.098 | 0.971 | Imputed   |
| rs6482406                   | 10:18707995_T/G          | 0.850 | 0.121 | 0.886 | 0.768 | 1.022  | 0.098 | 0.981 | Imputed   |
| rs79960536                  | 10:18747756_G/A          | 0.656 | 0.399 | 0.913 | 0.820 | 1.017  | 0.098 | 0.971 | Imputed   |
| rs10734056                  | 10:18721986_G/A          | 0.849 | 0.171 | 0.887 | 0.769 | 1.022  | 0.098 | 0.987 | Imputed   |
| rs10741111                  | 10:18903769_A/C          | 0.253 | 0.248 | 1.106 | 0.982 | 1.245  | 0.098 | 0.923 | Imputed   |
| rs140985799                 | 10:18580502_A/T          | 0.010 | 1.000 | 0.623 | 0.355 | 1.092  | 0.098 | 0.817 | Imputed   |
| rs74688261                  | 10:18412294_A/G          | 0.086 | 0.313 | 1.166 | 0.972 | 1.399  | 0.099 | 0.968 | Imputed   |
| rs10741057                  | 10:18716103_C/A          | 0.850 | 0.092 | 0.887 | 0.769 | 1.023  | 0.099 | 0.990 | Imputed   |
| rs1575836                   | 10:18714705_G/T          | 0.851 | 0.104 | 0.887 | 0.769 | 1.023  | 0.099 | 0.992 | Imputed   |
| rs1757215                   | 10:18506267_A/G          | 0.757 | 0.897 | 1.104 | 0.982 | 1.242  | 0.099 | 0.981 | Imputed   |
| rs10828605                  | 10:18665698_A/G          | 0.246 | 0.346 | 1.103 | 0.982 | 1.239  | 0.099 | 0.981 | Imputed   |
| rs10828606                  | 10:18665710_A/G          | 0.246 | 0.346 | 1.103 | 0.982 | 1.239  | 0.099 | 0.981 | Imputed   |
| rs67797223                  | 10:18673683_C/CA         | 0.250 | 0.288 | 0.906 | 0.806 | 1.019  | 0.099 | 0.970 | Imputed   |
| rs12761993                  | 10:18400523_G/A          | 0.163 | 0.684 | 0.891 | 0.778 | 1.022  | 0.099 | 0.988 | Imputed   |
| rs2226131                   | 10:18343879_C/G          | 0.381 | 0.013 | 1.089 | 0.984 | 1.205  | 0.099 | 0.993 | Imputed   |
| rs77121574                  | 10:18413667_T/A          | 0.086 | 0.313 | 1.165 | 0.971 | 1.398  | 0.100 | 0.969 | Imputed   |
| rs75187737                  | 10:18530364_G/A          | 0.003 | 1.000 | 2.541 | 0.838 | 7.710  | 0.100 | 0.728 | Imputed   |
| rs113600505                 | 10:18409954_C/T          | 0.086 | 0.313 | 1.165 | 0.971 | 1.398  | 0.100 | 0.968 | Imputed   |
| rs11592978                  | 10:18348554_G/T          | 0.381 | 0.009 | 1.089 | 0.984 | 1.206  | 0.100 | 0.982 | Imputed   |
| rs78591922                  | 10:18753208_G/T          | 0.004 | 1.000 | 0.458 | 0.181 | 1.161  | 0.100 | 0.752 | Imputed   |
| rs144491240                 | 10:18400748_C/T          | 0.043 | 0.539 | 1.240 | 0.959 | 1.603  | 0.100 | 0.911 | Imputed   |
| rs1623474                   | 10:18471794_C/T          | 0.307 | 0.552 | 0.913 | 0.819 | 1.018  | 0.100 | 0.985 | Imputed   |
| BI_GS_DEL1_B1_P1706_2<br>55 | 10:18503073_A/<CN0>      | 0.774 | 0.255 | 1.106 | 0.981 | 1.248  | 0.101 | 0.979 | Imputed   |
| rs12770401                  | 10:18747747_G/T          | 0.653 | 0.551 | 0.914 | 0.821 | 1.018  | 0.101 | 0.964 | Imputed   |
| rs199615041                 | 10:18731761_AAAAG/A      | 0.031 | 1.000 | 1.278 | 0.953 | 1.712  | 0.101 | 0.957 | Imputed   |
| rs7911644                   | 10:18468589_C/T          | 0.306 | 0.602 | 0.914 | 0.820 | 1.018  | 0.101 | 1.000 | Genotyped |
| 10:18770119                 | 10:18770119_C/T          | 0.001 | 1.000 | 5.403 | 0.716 | 40.744 | 0.102 | 0.623 | Imputed   |

SUPPLEMENTARY DATA

|             |                             |       |       |       |       |        |       |       |           |
|-------------|-----------------------------|-------|-------|-------|-------|--------|-------|-------|-----------|
| rs7908976   | 10:18670996_G/A             | 0.401 | 0.308 | 0.919 | 0.831 | 1.017  | 0.102 | 0.998 | Imputed   |
| rs6482397   | 10:18704632_C/T             | 0.850 | 0.152 | 0.887 | 0.768 | 1.024  | 0.102 | 0.973 | Imputed   |
| rs117959347 | 10:18597351_A/G             | 0.007 | 0.012 | 1.659 | 0.904 | 3.042  | 0.102 | 0.878 | Imputed   |
| rs11013950  | 10:18670717_A/G             | 0.402 | 0.308 | 0.919 | 0.831 | 1.017  | 0.102 | 0.998 | Imputed   |
| rs112187383 | 10:18463315_T/TTCTC         | 0.770 | 0.002 | 0.894 | 0.781 | 1.023  | 0.102 | 0.784 | Imputed   |
| rs10741003  | 10:18458081_A/G             | 0.516 | 0.229 | 0.921 | 0.834 | 1.017  | 0.103 | 0.966 | Imputed   |
| rs7097524   | 10:18927519_T/C             | 0.137 | 0.003 | 0.877 | 0.749 | 1.027  | 0.103 | 0.831 | Imputed   |
| rs118123936 | 10:18860022_C/T             | 0.131 | 0.150 | 1.137 | 0.974 | 1.327  | 0.103 | 0.894 | Imputed   |
| rs4748464   | 10:18712258_C/A             | 0.852 | 0.117 | 0.888 | 0.769 | 1.025  | 0.104 | 0.992 | Imputed   |
| rs200780635 | 10:18541789_A/AAGGTAGGC     | 0.048 | 0.185 | 0.804 | 0.619 | 1.046  | 0.104 | 0.809 | Imputed   |
| rs10741058  | 10:18716145_T/C             | 0.851 | 0.104 | 0.888 | 0.770 | 1.025  | 0.104 | 0.991 | Imputed   |
| rs11440334  | 10:18457004_T/TA            | 0.516 | 0.217 | 0.921 | 0.834 | 1.017  | 0.104 | 0.995 | Imputed   |
| rs6482411   | 10:18715941_G/A             | 0.851 | 0.117 | 0.888 | 0.770 | 1.025  | 0.104 | 0.992 | Imputed   |
| rs16917197  | 10:18649694_A/G             | 0.188 | 0.403 | 0.899 | 0.790 | 1.022  | 0.104 | 0.973 | Imputed   |
| rs6482408   | 10:18715540_A/G             | 0.851 | 0.117 | 0.888 | 0.770 | 1.025  | 0.104 | 0.992 | Imputed   |
| rs6482409   | 10:18715589_C/T             | 0.851 | 0.117 | 0.888 | 0.770 | 1.025  | 0.104 | 0.992 | Imputed   |
| rs6415973   | 10:18715168_C/T             | 0.851 | 0.104 | 0.888 | 0.770 | 1.025  | 0.104 | 0.993 | Imputed   |
| rs6482410   | 10:18715610_A/G             | 0.851 | 0.117 | 0.888 | 0.770 | 1.025  | 0.104 | 0.992 | Imputed   |
| rs4747339   | 10:18591423_C/T             | 0.150 | 0.007 | 0.884 | 0.762 | 1.026  | 0.104 | 0.878 | Imputed   |
| rs6415974   | 10:18715259_T/C             | 0.851 | 0.104 | 0.888 | 0.770 | 1.025  | 0.104 | 0.992 | Imputed   |
| rs997264    | 10:18703895_C/A             | 0.852 | 0.117 | 0.887 | 0.768 | 1.025  | 0.104 | 0.971 | Imputed   |
| rs35673571  | 10:18927876_T/TA            | 0.109 | 0.000 | 0.859 | 0.715 | 1.032  | 0.105 | 0.743 | Imputed   |
| rs77903299  | 10:18440839_G/A             | 0.024 | 1.000 | 0.758 | 0.543 | 1.059  | 0.105 | 0.965 | Imputed   |
| rs10828607  | 10:18665726_C/T             | 0.251 | 0.422 | 1.100 | 0.980 | 1.236  | 0.105 | 0.978 | Imputed   |
| rs17661538  | 10:18397247_G/C             | 0.163 | 0.685 | 0.894 | 0.780 | 1.024  | 0.105 | 1.000 | Genotyped |
| rs34736338  | 10:18398489_T/A             | 0.163 | 0.685 | 0.894 | 0.780 | 1.024  | 0.105 | 0.996 | Imputed   |
| rs7477742   | 10:18695759_G/A             | 0.511 | 0.343 | 0.920 | 0.832 | 1.018  | 0.105 | 0.982 | Imputed   |
| rs10764483  | 10:18716346_A/G             | 0.851 | 0.117 | 0.889 | 0.770 | 1.025  | 0.106 | 0.991 | Imputed   |
| rs11014092  | 10:18696029_C/T             | 0.511 | 0.312 | 0.920 | 0.832 | 1.018  | 0.106 | 0.983 | Imputed   |
| rs34571084  | 10:18397597_G/A             | 0.163 | 0.685 | 0.894 | 0.780 | 1.024  | 0.106 | 0.998 | Imputed   |
| rs12769993  | 10:18397565_A/G             | 0.163 | 0.685 | 0.894 | 0.780 | 1.024  | 0.106 | 0.998 | Imputed   |
| rs1277768   | 10:18499676_G/A             | 0.803 | 0.726 | 1.109 | 0.978 | 1.257  | 0.106 | 1.000 | Genotyped |
| rs144095638 | 10:18903308_C/T             | 0.008 | 0.212 | 1.657 | 0.898 | 3.057  | 0.106 | 0.776 | Imputed   |
| rs12258323  | 10:18619763_G/A             | 0.359 | 0.203 | 0.916 | 0.824 | 1.019  | 0.106 | 0.954 | Imputed   |
| rs10508557  | 10:18388277_A/G             | 0.164 | 0.602 | 0.893 | 0.777 | 1.025  | 0.107 | 0.968 | Imputed   |
| rs34496310  | 10:18397659_G/A             | 0.163 | 0.685 | 0.894 | 0.781 | 1.024  | 0.107 | 0.998 | Imputed   |
| rs10828592  | 10:18655497_G/A             | 0.285 | 0.640 | 1.096 | 0.980 | 1.226  | 0.107 | 0.979 | Imputed   |
| rs2489207   | 10:18505787_A/G             | 0.806 | 0.392 | 1.111 | 0.977 | 1.262  | 0.107 | 0.971 | Imputed   |
| rs11599314  | 10:18398954_G/A             | 0.163 | 0.727 | 0.894 | 0.780 | 1.025  | 0.108 | 0.993 | Imputed   |
| rs71497232  | 10:18394548_C/T             | 0.162 | 0.727 | 0.894 | 0.779 | 1.025  | 0.108 | 0.987 | Imputed   |
| rs11597102  | 10:18385642_T/G             | 0.160 | 0.859 | 0.892 | 0.776 | 1.025  | 0.108 | 0.963 | Imputed   |
| rs78462934  | 10:18747755_C/T             | 0.657 | 0.880 | 0.916 | 0.823 | 1.020  | 0.108 | 0.974 | Imputed   |
| rs111469276 | 10:18655720_C/CA            | 0.285 | 0.459 | 1.097 | 0.980 | 1.228  | 0.108 | 0.963 | Imputed   |
| rs6482360   | 10:18656895_C/T             | 0.285 | 0.640 | 1.096 | 0.980 | 1.225  | 0.108 | 0.981 | Imputed   |
| 10:18633601 | 10:18633601_CA/C            | 0.003 | 1.000 | 2.377 | 0.825 | 6.843  | 0.109 | 0.787 | Imputed   |
| rs80145851  | 10:18748661_C/A             | 0.014 | 1.000 | 1.483 | 0.916 | 2.404  | 0.109 | 0.756 | Imputed   |
| rs7923191   | 10:18727901_A/G             | 0.212 | 0.168 | 1.107 | 0.977 | 1.255  | 0.109 | 0.950 | Imputed   |
| 10:18442492 | 10:18442492_CTTAT/CTTATTTAT | 0.285 | 0.534 | 0.914 | 0.818 | 1.021  | 0.110 | 0.985 | Imputed   |
| 10:18442492 | 10:18442492_CTTAT/CTTATTTAT | 0.285 | 0.534 | 0.914 | 0.818 | 1.021  | 0.110 | 0.985 | Imputed   |
| rs138892750 | 10:18442492_CTTAT/CTTATTTAT | 0.285 | 0.534 | 0.914 | 0.818 | 1.021  | 0.110 | 0.985 | Imputed   |
| 10:18738310 | 10:18738310_TAAAATAA/T      | 0.006 | 1.000 | 1.745 | 0.881 | 3.458  | 0.110 | 0.935 | Imputed   |
| rs192081866 | 10:18447690_G/T             | 0.012 | 0.376 | 1.503 | 0.911 | 2.482  | 0.111 | 0.845 | Imputed   |
| 10:18447715 | 10:18447715_A/T             | 0.012 | 0.376 | 1.503 | 0.911 | 2.482  | 0.111 | 0.845 | Imputed   |
| rs11014211  | 10:18722168_G/A             | 0.221 | 0.963 | 0.905 | 0.801 | 1.023  | 0.111 | 0.880 | Imputed   |
| rs147379726 | 10:18408865_T/TTTG          | 0.089 | 0.922 | 1.155 | 0.967 | 1.381  | 0.112 | 0.966 | Imputed   |
| 10:18387376 | 10:18387376_G/A             | 0.004 | 0.043 | 2.074 | 0.840 | 5.119  | 0.114 | 0.768 | Imputed   |
| rs747296    | 10:18741274_T/A             | 0.658 | 0.419 | 0.918 | 0.826 | 1.021  | 0.114 | 0.999 | Imputed   |
| rs4748477   | 10:18798319_T/C             | 0.360 | 0.232 | 1.088 | 0.980 | 1.208  | 0.115 | 1.000 | Genotyped |
| rs10828623  | 10:18680935_T/C             | 0.843 | 0.534 | 0.891 | 0.771 | 1.029  | 0.115 | 0.942 | Imputed   |
| rs17691888  | 10:18734528_G/A             | 0.158 | 0.903 | 1.120 | 0.972 | 1.290  | 0.116 | 0.952 | Imputed   |
| rs111788868 | 10:18727092_G/A             | 0.220 | 0.963 | 0.906 | 0.802 | 1.025  | 0.117 | 0.979 | Imputed   |
| rs61841960  | 10:18708563_C/G             | 0.223 | 0.963 | 0.907 | 0.803 | 1.025  | 0.117 | 0.979 | Imputed   |
| rs12049663  | 10:18704240_G/A             | 0.224 | 0.890 | 0.907 | 0.803 | 1.025  | 0.117 | 0.975 | Imputed   |
| rs10734052  | 10:18702824_G/A             | 0.852 | 0.165 | 0.891 | 0.770 | 1.030  | 0.118 | 0.968 | Imputed   |
| rs35900015  | 10:18410191_T/A             | 0.197 | 0.920 | 0.905 | 0.798 | 1.026  | 0.118 | 0.999 | Imputed   |
| rs7478172   | 10:18410168_T/C             | 0.197 | 0.920 | 0.905 | 0.798 | 1.026  | 0.119 | 1.000 | Genotyped |
| rs7100500   | 10:18464579_A/C             | 0.474 | 0.949 | 0.923 | 0.834 | 1.021  | 0.120 | 0.980 | Imputed   |
| rs1539679   | 10:18502370_C/A             | 0.841 | 0.135 | 1.116 | 0.972 | 1.283  | 0.120 | 0.952 | Imputed   |
| rs191029833 | 10:18457192_C/A             | 0.014 | 0.492 | 0.711 | 0.461 | 1.097  | 0.123 | 0.931 | Imputed   |
| rs7072176   | 10:18658052_C/T             | 0.283 | 0.725 | 1.092 | 0.976 | 1.222  | 0.123 | 0.976 | Imputed   |
| rs59389737  | 10:18658053_T/A             | 0.283 | 0.725 | 1.092 | 0.976 | 1.222  | 0.124 | 0.976 | Imputed   |
| rs118130351 | 10:18928418_C/T             | 0.014 | 0.397 | 1.469 | 0.900 | 2.398  | 0.124 | 0.714 | Imputed   |
| rs57494713  | 10:18665187_A/G             | 0.249 | 0.735 | 0.913 | 0.813 | 1.025  | 0.124 | 0.993 | Imputed   |
| rs78510107  | 10:18414577_A/AG            | 0.092 | 0.923 | 1.147 | 0.963 | 1.366  | 0.124 | 0.977 | Imputed   |
| rs1573221   | 10:18488465_A/G             | 0.835 | 0.240 | 1.114 | 0.970 | 1.279  | 0.125 | 0.934 | Imputed   |
| rs1573222   | 10:18488689_G/A             | 0.835 | 0.240 | 1.114 | 0.970 | 1.279  | 0.125 | 0.934 | Imputed   |
| rs139653591 | 10:18742619_C/T             | 0.002 | 1.000 | 2.857 | 0.746 | 10.939 | 0.125 | 0.806 | Imputed   |
| rs4448592   | 10:18750451_C/T             | 0.655 | 0.888 | 0.919 | 0.825 | 1.024  | 0.125 | 0.958 | Imputed   |
| rs7919691   | 10:18652912_C/T             | 0.285 | 0.668 | 1.091 | 0.976 | 1.220  | 0.125 | 0.978 | Imputed   |
| rs4748469   | 10:18752212_G/A             | 0.652 | 0.889 | 0.919 | 0.825 | 1.024  | 0.125 | 0.957 | Imputed   |
| rs1325989   | 10:18740871_C/G             | 0.130 | 0.889 | 1.125 | 0.968 | 1.308  | 0.126 | 0.975 | Imputed   |
| rs12761917  | 10:18750657_G/C             | 0.655 | 0.888 | 0.919 | 0.825 | 1.024  | 0.126 | 0.957 | Imputed   |
| rs117440406 | 10:18487881_A/G             | 0.018 | 0.002 | 0.721 | 0.475 | 1.096  | 0.126 | 0.785 | Imputed   |
| rs146194009 | 10:18589787_AAAAT/A         | 0.279 | 0.000 | 0.910 | 0.806 | 1.027  | 0.126 | 0.848 | Imputed   |
| rs11458222  | 10:18660138_G/GT            | 0.243 | 0.548 | 1.096 | 0.974 | 1.234  | 0.126 | 0.973 | Imputed   |
| rs140119503 | 10:18729423_A/AC            | 0.134 | 1.000 | 1.122 | 0.968 | 1.302  | 0.126 | 0.985 | Imputed   |
| rs11013862  | 10:18654824_G/A             | 0.285 | 0.668 | 1.091 | 0.976 | 1.220  | 0.127 | 0.979 | Imputed   |
| rs7911542   | 10:18655118_A/G             | 0.285 | 0.668 | 1.091 | 0.976 | 1.220  | 0.127 | 0.979 | Imputed   |
| rs7904974   | 10:18654811_C/G             | 0.285 | 0.668 | 1.091 | 0.976 | 1.220  | 0.127 | 0.979 | Imputed   |
| rs75340843  | 10:18656138_ATTT/AT         | 0.263 | 0.592 | 1.093 | 0.975 | 1.227  | 0.128 | 0.969 | Imputed   |
| rs11014144  | 10:18704776_A/G             | 0.221 | 0.926 | 0.909 | 0.804 | 1.028  | 0.128 | 0.973 | Imputed   |
| rs12782993  | 10:18753980_C/T             | 0.651 | 0.917 | 0.919 | 0.825 | 1.024  | 0.128 | 0.952 | Imputed   |

## SUPPLEMENTARY DATA

|             |                    |       |       |       |       |        |       |       |           |
|-------------|--------------------|-------|-------|-------|-------|--------|-------|-------|-----------|
| rs16916844  | 10:18384824_A/C    | 0.164 | 0.953 | 0.897 | 0.780 | 1.032  | 0.128 | 0.949 | Imputed   |
| rs114761230 | 10:18795813_T/C    | 0.034 | 0.790 | 0.798 | 0.595 | 1.068  | 0.130 | 0.882 | Imputed   |
| rs10764493  | 10:18727999_G/A    | 0.867 | 0.945 | 0.891 | 0.768 | 1.035  | 0.130 | 0.980 | Imputed   |
| rs7072365   | 10:18663379_G/C    | 0.253 | 0.616 | 1.093 | 0.974 | 1.226  | 0.130 | 0.986 | Imputed   |
| rs11012983  | 10:18490601_A/T    | 0.097 | 0.637 | 0.871 | 0.729 | 1.042  | 0.130 | 0.901 | Imputed   |
| rs10828271  | 10:18439966_T/C    | 0.002 | 1.000 | 2.802 | 0.736 | 10.664 | 0.131 | 0.903 | Imputed   |
| rs4350266   | 10:18796992_C/A    | 0.371 | 0.710 | 1.084 | 0.976 | 1.204  | 0.131 | 0.986 | Imputed   |
| rs7893279   | 10:18745105_T/G    | 0.128 | 0.944 | 1.126 | 0.965 | 1.313  | 0.131 | 0.954 | Imputed   |
| rs1277736   | 10:18574980_G/A    | 0.353 | 0.000 | 0.918 | 0.822 | 1.026  | 0.131 | 0.867 | Imputed   |
| rs72784221  | 10:18552947_C/T    | 0.026 | 1.000 | 1.324 | 0.919 | 1.908  | 0.132 | 0.736 | Imputed   |
| rs7085825   | 10:18663446_C/A    | 0.253 | 0.616 | 1.092 | 0.974 | 1.226  | 0.132 | 0.988 | Imputed   |
| rs1325992   | 10:18662873_T/C    | 0.249 | 0.735 | 0.915 | 0.816 | 1.027  | 0.132 | 1.000 | Genotyped |
| rs188434513 | 10:18634847_C/G    | 0.006 | 1.000 | 0.570 | 0.274 | 1.187  | 0.133 | 0.754 | Imputed   |
| rs10734051  | 10:18664162_G/A    | 0.253 | 0.616 | 1.092 | 0.973 | 1.225  | 0.133 | 0.989 | Imputed   |
| rs1001486   | 10:18742477_G/A    | 0.657 | 0.400 | 0.922 | 0.829 | 1.025  | 0.133 | 1.000 | Genotyped |
| rs140068733 | 10:18510210_AT/A   | 0.115 | 0.075 | 1.141 | 0.960 | 1.355  | 0.133 | 0.828 | Imputed   |
| rs2482113   | 10:18506478_T/C    | 0.756 | 0.667 | 1.095 | 0.972 | 1.234  | 0.134 | 0.958 | Imputed   |
| rs4748468   | 10:18742254_G/A    | 0.128 | 0.887 | 1.123 | 0.965 | 1.308  | 0.134 | 0.971 | Imputed   |
| rs11014012  | 10:18681659_G/T    | 0.510 | 0.312 | 0.925 | 0.836 | 1.024  | 0.134 | 0.959 | Imputed   |
| rs149216751 | 10:18743435_TG/T   | 0.127 | 0.887 | 1.124 | 0.964 | 1.311  | 0.135 | 0.961 | Imputed   |
| rs2148182   | 10:18767532_G/A    | 0.159 | 0.290 | 1.111 | 0.968 | 1.276  | 0.135 | 0.984 | Imputed   |
| rs16916853  | 10:18389856_G/C    | 0.129 | 0.139 | 1.139 | 0.960 | 1.352  | 0.135 | 0.767 | Imputed   |
| rs912983    | 10:18743467_C/T    | 0.127 | 0.887 | 1.124 | 0.964 | 1.311  | 0.135 | 0.961 | Imputed   |
| rs12774837  | 10:18744005_C/T    | 0.127 | 0.887 | 1.124 | 0.964 | 1.312  | 0.136 | 0.958 | Imputed   |
| rs7920123   | 10:18656963_A/C    | 0.259 | 0.592 | 1.091 | 0.973 | 1.224  | 0.136 | 0.982 | Imputed   |
| rs12761528  | 10:18406417_C/G    | 0.158 | 0.721 | 0.901 | 0.785 | 1.033  | 0.136 | 0.991 | Imputed   |
| rs12777104  | 10:18406393_T/C    | 0.158 | 0.721 | 0.901 | 0.785 | 1.034  | 0.136 | 0.991 | Imputed   |
| rs12256910  | 10:18372688_T/C    | 0.281 | 0.004 | 0.917 | 0.817 | 1.028  | 0.137 | 0.911 | Imputed   |
| rs72513815  | 10:18752290_T/TA   | 0.126 | 0.356 | 1.128 | 0.962 | 1.323  | 0.137 | 0.911 | Imputed   |
| rs12777923  | 10:18661160_G/T    | 0.118 | 0.380 | 1.131 | 0.962 | 1.331  | 0.137 | 0.916 | Imputed   |
| rs149889908 | 10:18737405_A/AT   | 0.141 | 0.111 | 1.118 | 0.965 | 1.296  | 0.137 | 0.948 | Imputed   |
| rs10734050  | 10:18663998_T/C    | 0.254 | 0.616 | 1.091 | 0.973 | 1.224  | 0.137 | 0.992 | Imputed   |
| rs34788049  | 10:18407451_CA/C   | 0.416 | 0.000 | 0.924 | 0.831 | 1.026  | 0.139 | 0.900 | Imputed   |
| rs7084123   | 10:18698339_C/T    | 0.845 | 0.199 | 0.898 | 0.779 | 1.036  | 0.139 | 0.969 | Imputed   |
| rs75133832  | 10:18330945_C/T    | 0.038 | 0.020 | 0.826 | 0.642 | 1.064  | 0.139 | 0.997 | Imputed   |
| rs1750477   | 10:18600905_A/G    | 0.634 | 0.003 | 1.089 | 0.973 | 1.219  | 0.139 | 0.860 | Imputed   |
| rs4424572   | 10:18764861_G/A    | 0.158 | 0.313 | 1.110 | 0.966 | 1.275  | 0.140 | 0.992 | Imputed   |
| rs78122842  | 10:18443866_G/A    | 0.011 | 1.000 | 1.466 | 0.882 | 2.436  | 0.140 | 0.907 | Imputed   |
| rs1998820   | 10:18751103_T/A    | 0.124 | 0.057 | 1.126 | 0.962 | 1.318  | 0.140 | 0.938 | Imputed   |
| rs1325991   | 10:18663002_T/A    | 0.259 | 0.680 | 1.090 | 0.972 | 1.223  | 0.140 | 0.985 | Imputed   |
| rs1926028   | 10:18662696_A/G    | 0.259 | 0.650 | 1.090 | 0.972 | 1.223  | 0.140 | 0.985 | Imputed   |
| rs1998821   | 10:18751242_G/A    | 0.124 | 0.168 | 1.126 | 0.962 | 1.318  | 0.140 | 0.938 | Imputed   |
| rs11012345  | 10:18330830_G/A    | 0.038 | 0.020 | 0.827 | 0.642 | 1.065  | 0.140 | 0.995 | Imputed   |
| rs150552369 | 10:18332764_T/C    | 0.038 | 0.020 | 0.827 | 0.642 | 1.065  | 0.141 | 0.996 | Imputed   |
| rs2497815   | 10:18365380_A/T    | 0.375 | 0.415 | 1.084 | 0.974 | 1.206  | 0.141 | 0.922 | Imputed   |
| rs35215145  | 10:18719060_TA/T   | 0.817 | 0.705 | 0.904 | 0.791 | 1.034  | 0.141 | 0.946 | Imputed   |
| rs1757206   | 10:18473370_T/C    | 0.758 | 0.085 | 1.094 | 0.971 | 1.233  | 0.141 | 0.976 | Imputed   |
| rs12767511  | 10:18385184_G/A    | 0.158 | 0.763 | 0.900 | 0.782 | 1.036  | 0.141 | 0.960 | Imputed   |
| rs72012473  | 10:18686649_CAAA/C | 0.328 | 0.000 | 1.092 | 0.971 | 1.228  | 0.141 | 0.852 | Imputed   |
| rs145028225 | 10:18922206_G/T    | 0.004 | 0.001 | 1.806 | 0.821 | 3.972  | 0.141 | 0.762 | Imputed   |
| rs1757205   | 10:18473693_G/T    | 0.758 | 0.085 | 1.094 | 0.971 | 1.233  | 0.142 | 0.975 | Imputed   |
| rs111670086 | 10:18659233_G/GT   | 0.259 | 0.621 | 1.090 | 0.972 | 1.222  | 0.142 | 0.983 | Imputed   |
| rs11013889  | 10:18659330_G/A    | 0.259 | 0.621 | 1.090 | 0.972 | 1.222  | 0.142 | 0.984 | Imputed   |
| rs17539088  | 10:18659143_G/A    | 0.259 | 0.621 | 1.090 | 0.972 | 1.222  | 0.142 | 0.984 | Imputed   |
| rs12571057  | 10:18401614_A/T    | 0.158 | 0.632 | 0.902 | 0.786 | 1.035  | 0.142 | 0.988 | Imputed   |
| rs201439887 | 10:18731752_T/TA   | 0.132 | 0.834 | 1.119 | 0.963 | 1.301  | 0.143 | 0.967 | Imputed   |
| rs12784686  | 10:18751891_T/C    | 0.123 | 0.249 | 1.125 | 0.961 | 1.318  | 0.143 | 0.938 | Imputed   |
| rs2148184   | 10:18680963_T/C    | 0.117 | 0.574 | 1.129 | 0.960 | 1.328  | 0.143 | 0.942 | Imputed   |
| rs1779240   | 10:18476313_G/A    | 0.777 | 0.202 | 1.097 | 0.969 | 1.242  | 0.143 | 0.959 | Imputed   |
| rs61839222  | 10:18659214_A/C    | 0.260 | 0.621 | 1.089 | 0.971 | 1.222  | 0.143 | 0.983 | Imputed   |
| rs16917217  | 10:18659205_G/A    | 0.260 | 0.621 | 1.089 | 0.971 | 1.222  | 0.143 | 0.983 | Imputed   |
| rs117624393 | 10:18343086_A/G    | 0.039 | 0.020 | 0.828 | 0.642 | 1.066  | 0.143 | 0.989 | Imputed   |
| rs148215925 | 10:18616168_C/A    | 0.002 | 1.000 | 2.249 | 0.760 | 6.655  | 0.143 | 0.908 | Imputed   |
| rs10741040  | 10:18659885_A/C    | 0.259 | 0.621 | 1.089 | 0.971 | 1.221  | 0.143 | 0.985 | Imputed   |
| rs75070986  | 10:18794489_T/C    | 0.035 | 0.787 | 0.804 | 0.600 | 1.077  | 0.143 | 0.856 | Imputed   |
| rs61844175  | 10:18455868_G/A    | 0.248 | 0.106 | 0.918 | 0.818 | 1.030  | 0.143 | 0.993 | Imputed   |
| rs192391356 | 10:18389586_G/A    | 0.011 | 0.335 | 1.499 | 0.871 | 2.578  | 0.144 | 0.787 | Imputed   |
| rs1779238   | 10:18475974_G/A    | 0.757 | 0.093 | 1.094 | 0.970 | 1.234  | 0.144 | 0.960 | Imputed   |
| rs11013044  | 10:18504830_G/A    | 0.099 | 1.000 | 0.878 | 0.738 | 1.045  | 0.144 | 0.932 | Imputed   |
| rs183560036 | 10:18660702_A/G    | 0.259 | 0.621 | 1.089 | 0.971 | 1.221  | 0.144 | 0.986 | Imputed   |
| rs7077127   | 10:18717348_G/T    | 0.330 | 0.543 | 0.923 | 0.829 | 1.028  | 0.144 | 0.980 | Imputed   |
| rs143210920 | 10:18343927_A/T    | 0.039 | 0.020 | 0.828 | 0.643 | 1.067  | 0.144 | 0.989 | Imputed   |
| rs6482438   | 10:18726418_C/T    | 0.766 | 0.824 | 1.094 | 0.970 | 1.233  | 0.144 | 0.978 | Imputed   |
| rs141182035 | 10:18651810_C/T    | 0.002 | 1.000 | 2.240 | 0.758 | 6.621  | 0.145 | 0.933 | Imputed   |
| rs10828653  | 10:18696297_T/C    | 0.845 | 0.220 | 0.899 | 0.780 | 1.037  | 0.145 | 0.968 | Imputed   |
| rs60046163  | 10:18720701_CT/C   | 0.840 | 0.167 | 0.901 | 0.783 | 1.037  | 0.145 | 0.973 | Imputed   |
| rs193150123 | 10:18606032_A/T    | 0.002 | 1.000 | 2.241 | 0.756 | 6.645  | 0.146 | 0.899 | Imputed   |
| rs16917412  | 10:18805478_C/T    | 0.033 | 0.786 | 0.805 | 0.600 | 1.078  | 0.146 | 0.908 | Imputed   |
| rs182088542 | 10:18344752_A/G    | 0.039 | 0.020 | 0.829 | 0.643 | 1.068  | 0.146 | 0.989 | Imputed   |
| rs66540356  | 10:18471750_CA/C   | 0.302 | 0.345 | 0.920 | 0.823 | 1.029  | 0.146 | 0.939 | Imputed   |
| rs61842672  | 10:18569899_G/A    | 0.042 | 0.369 | 1.230 | 0.930 | 1.627  | 0.146 | 0.778 | Imputed   |
| rs10764298  | 10:18351858_A/G    | 0.296 | 0.014 | 0.920 | 0.822 | 1.030  | 0.147 | 0.914 | Imputed   |
| rs370783852 | 10:18485222_C/CTT  | 0.719 | 0.042 | 1.095 | 0.968 | 1.239  | 0.147 | 0.825 | Imputed   |
| rs200318932 | 10:18338991_GA/G   | 0.038 | 0.020 | 0.829 | 0.644 | 1.068  | 0.147 | 0.993 | Imputed   |
| rs1779227   | 10:18473271_T/C    | 0.760 | 0.063 | 1.093 | 0.969 | 1.233  | 0.148 | 0.972 | Imputed   |
| rs151260991 | 10:18435149_G/A    | 0.048 | 0.058 | 0.838 | 0.659 | 1.065  | 0.148 | 0.899 | Imputed   |
| rs7923938   | 10:18744719_T/C    | 0.129 | 0.889 | 1.120 | 0.960 | 1.305  | 0.149 | 0.953 | Imputed   |
| rs16917404  | 10:18800315_C/G    | 0.033 | 0.791 | 0.807 | 0.602 | 1.080  | 0.149 | 0.904 | Imputed   |
| rs7901058   | 10:18661404_C/T    | 0.237 | 0.930 | 1.092 | 0.969 | 1.230  | 0.149 | 0.980 | Imputed   |
| rs76466243  | 10:18730310_C/G    | 0.178 | 0.742 | 0.907 | 0.794 | 1.036  | 0.149 | 0.967 | Imputed   |
| rs10764443  | 10:18651348_C/G    | 0.260 | 0.621 | 1.088 | 0.970 | 1.221  | 0.149 | 0.975 | Imputed   |
| rs201981684 | 10:18437813_TTGG/T | 0.010 | 1.000 | 1.456 | 0.873 | 2.426  | 0.150 | 0.949 | Imputed   |

## SUPPLEMENTARY DATA

|             |                             |       |       |       |       |        |       |       |         |
|-------------|-----------------------------|-------|-------|-------|-------|--------|-------|-------|---------|
| rs7920997   | 10:18892125_G/C             | 0.433 | 0.057 | 1.080 | 0.973 | 1.199  | 0.150 | 0.928 | Imputed |
| 10:18918298 | 10:18918298_A/T             | 0.003 | 1.000 | 2.255 | 0.745 | 6.824  | 0.150 | 0.672 | Imputed |
| rs11371304  | 10:18653171_C/CG            | 0.259 | 0.621 | 1.088 | 0.970 | 1.221  | 0.150 | 0.976 | Imputed |
| rs76999536  | 10:18654731_ATT/A           | 0.259 | 0.621 | 1.088 | 0.970 | 1.221  | 0.150 | 0.977 | Imputed |
| rs143563195 | 10:18361404_AT/A            | 0.276 | 0.022 | 0.919 | 0.819 | 1.031  | 0.150 | 0.921 | Imputed |
| rs7898684   | 10:18653107_T/G             | 0.259 | 0.621 | 1.088 | 0.970 | 1.221  | 0.151 | 0.976 | Imputed |
| rs7907743   | 10:18653192_G/A             | 0.259 | 0.621 | 1.088 | 0.970 | 1.221  | 0.151 | 0.976 | Imputed |
| rs149827012 | 10:18342890_C/T             | 0.039 | 0.020 | 0.831 | 0.645 | 1.070  | 0.151 | 0.991 | Imputed |
| rs4748473   | 10:18790620_A/G             | 0.034 | 0.783 | 0.807 | 0.602 | 1.081  | 0.151 | 0.877 | Imputed |
| rs10828237  | 10:18386960_G/A             | 0.101 | 0.851 | 0.879 | 0.737 | 1.048  | 0.151 | 0.875 | Imputed |
| rs149774640 | 10:18347816_G/A             | 0.039 | 0.020 | 0.831 | 0.645 | 1.070  | 0.151 | 0.989 | Imputed |
| rs11013865  | 10:18656165_C/T             | 0.236 | 0.930 | 1.091 | 0.969 | 1.230  | 0.151 | 0.978 | Imputed |
| rs12251803  | 10:18347918_C/T             | 0.039 | 0.020 | 0.831 | 0.645 | 1.070  | 0.152 | 0.974 | Imputed |
| rs7079485   | 10:18708325_A/C             | 0.220 | 0.377 | 1.093 | 0.968 | 1.236  | 0.152 | 0.972 | Imputed |
| rs11013859  | 10:18653986_A/G             | 0.259 | 0.621 | 1.088 | 0.970 | 1.221  | 0.152 | 0.977 | Imputed |
| rs12572782  | 10:18654086_C/T             | 0.259 | 0.621 | 1.088 | 0.970 | 1.221  | 0.152 | 0.977 | Imputed |
| rs4747340   | 10:18592341_G/A             | 0.495 | 0.000 | 0.924 | 0.830 | 1.029  | 0.152 | 0.865 | Imputed |
| rs10828166  | 10:18349603_C/T             | 0.109 | 0.014 | 0.884 | 0.748 | 1.046  | 0.152 | 0.885 | Imputed |
| rs76956711  | 10:18654561_A/AT            | 0.259 | 0.621 | 1.088 | 0.969 | 1.220  | 0.152 | 0.977 | Imputed |
| rs7911051   | 10:18661421_T/C             | 0.236 | 0.930 | 1.091 | 0.968 | 1.229  | 0.152 | 0.982 | Imputed |
| rs7907244   | 10:18661466_A/G             | 0.236 | 0.930 | 1.091 | 0.968 | 1.229  | 0.152 | 0.983 | Imputed |
| rs7067916   | 10:18475075_A/G             | 0.771 | 0.089 | 1.093 | 0.967 | 1.236  | 0.153 | 0.969 | Imputed |
| rs1757207   | 10:18472861_T/C             | 0.760 | 0.069 | 1.092 | 0.968 | 1.231  | 0.153 | 0.974 | Imputed |
| rs1757209   | 10:18472842_C/T             | 0.760 | 0.069 | 1.092 | 0.968 | 1.231  | 0.153 | 0.974 | Imputed |
| rs11815615  | 10:18718585_G/A             | 0.216 | 0.259 | 1.093 | 0.967 | 1.236  | 0.153 | 0.972 | Imputed |
| rs181929921 | 10:18378149_G/A             | 0.010 | 0.335 | 1.495 | 0.861 | 2.597  | 0.154 | 0.775 | Imputed |
| rs12358478  | 10:18329756_G/T             | 0.047 | 0.473 | 0.841 | 0.662 | 1.067  | 0.154 | 0.996 | Imputed |
| rs55890801  | 10:18454044_G/A             | 0.239 | 0.061 | 0.919 | 0.818 | 1.032  | 0.154 | 0.993 | Imputed |
| 10:18762306 | 10:18762306_C/T             | 0.001 | 1.000 | 3.245 | 0.643 | 16.379 | 0.154 | 0.816 | Imputed |
| rs10741042  | 10:18662006_C/A             | 0.235 | 0.895 | 1.091 | 0.968 | 1.229  | 0.154 | 0.982 | Imputed |
| rs10764447  | 10:18662204_G/A             | 0.235 | 0.895 | 1.091 | 0.968 | 1.229  | 0.154 | 0.982 | Imputed |
| 10:18732645 | 10:18732645_C/CT            | 0.541 | 0.000 | 0.922 | 0.825 | 1.031  | 0.155 | 0.819 | Imputed |
| rs11412050  | 10:18732645_C/CT            | 0.541 | 0.000 | 0.922 | 0.825 | 1.031  | 0.155 | 0.819 | Imputed |
| 10:18478846 | 10:18478846_C/A             | 0.011 | 0.282 | 0.679 | 0.398 | 1.159  | 0.156 | 0.758 | Imputed |
| rs77537106  | 10:18789665_G/A             | 0.011 | 1.000 | 1.533 | 0.850 | 2.766  | 0.156 | 0.609 | Imputed |
| rs4748453   | 10:18646986_C/T             | 0.372 | 0.112 | 0.927 | 0.835 | 1.029  | 0.156 | 0.970 | Imputed |
| rs11013043  | 10:18504770_C/T             | 0.100 | 0.785 | 0.882 | 0.742 | 1.049  | 0.157 | 0.928 | Imputed |
| rs7099729   | 10:18658961_C/T             | 0.236 | 0.895 | 1.090 | 0.967 | 1.228  | 0.158 | 0.980 | Imputed |
| rs3829133   | 10:18690668_A/G             | 0.241 | 0.663 | 0.917 | 0.814 | 1.034  | 0.158 | 0.969 | Imputed |
| rs12765367  | 10:18713906_G/A             | 0.073 | 0.909 | 0.871 | 0.718 | 1.055  | 0.158 | 0.980 | Imputed |
| 10:18471587 | 10:18471587_C/A             | 0.005 | 0.003 | 1.666 | 0.821 | 3.381  | 0.158 | 0.933 | Imputed |
| rs35350800  | 10:18561582_T/T/A           | 0.596 | 0.235 | 1.077 | 0.972 | 1.194  | 0.158 | 0.964 | Imputed |
| rs41494451  | 10:18459914_C/T             | 0.085 | 0.003 | 0.881 | 0.738 | 1.051  | 0.158 | 0.984 | Imputed |
| rs1779226   | 10:18472977_A/G             | 0.771 | 0.089 | 1.092 | 0.966 | 1.233  | 0.158 | 0.976 | Imputed |
| rs1750479   | 10:18646374_T/C             | 0.733 | 1.000 | 0.920 | 0.819 | 1.033  | 0.159 | 0.955 | Imputed |
| rs6482412   | 10:18719079_A/G             | 0.834 | 0.301 | 0.906 | 0.791 | 1.039  | 0.159 | 0.984 | Imputed |
| rs76933945  | 10:18788158_C/G             | 0.033 | 0.781 | 0.810 | 0.604 | 1.086  | 0.159 | 0.888 | Imputed |
| rs7910898   | 10:18661281_T/C             | 0.236 | 0.895 | 1.089 | 0.967 | 1.227  | 0.160 | 0.984 | Imputed |
| rs7071123   | 10:18726218_G/T             | 0.869 | 0.945 | 0.898 | 0.774 | 1.043  | 0.160 | 0.985 | Imputed |
| rs56159019  | 10:18650916_T/A             | 0.004 | 1.000 | 2.076 | 0.749 | 5.753  | 0.160 | 0.603 | Imputed |
| rs16916916  | 10:18458707_C/T             | 0.085 | 0.003 | 0.881 | 0.739 | 1.051  | 0.160 | 0.986 | Imputed |
| rs16916912  | 10:18457609_C/T             | 0.085 | 0.003 | 0.882 | 0.739 | 1.051  | 0.161 | 0.986 | Imputed |
| rs17690664  | 10:18701678_C/T             | 0.244 | 0.437 | 0.919 | 0.816 | 1.034  | 0.161 | 0.976 | Imputed |
| rs6482444   | 10:18730118_A/G             | 0.032 | 0.794 | 0.814 | 0.610 | 1.086  | 0.162 | 0.962 | Imputed |
| rs113835382 | 10:18435422_T/G             | 0.085 | 0.004 | 0.882 | 0.739 | 1.052  | 0.162 | 0.980 | Imputed |
| rs75684183  | 10:18390422_C/T             | 0.011 | 1.000 | 1.434 | 0.865 | 2.379  | 0.162 | 0.916 | Imputed |
| rs12766253  | 10:18400425_A/C             | 0.191 | 0.606 | 0.913 | 0.803 | 1.038  | 0.163 | 0.984 | Imputed |
| rs72780045  | 10:18332860_T/A             | 0.047 | 0.473 | 0.844 | 0.664 | 1.072  | 0.164 | 0.972 | Imputed |
| rs11012876  | 10:18466140_A/T             | 0.085 | 0.003 | 0.882 | 0.739 | 1.053  | 0.164 | 0.981 | Imputed |
| rs188886629 | 10:18567344_C/T             | 0.001 | 0.003 | 2.749 | 0.660 | 11.462 | 0.165 | 0.865 | Imputed |
| rs11012800  | 10:18435006_C/T             | 0.085 | 0.004 | 0.882 | 0.739 | 1.053  | 0.165 | 0.979 | Imputed |
| rs11012507  | 10:18358539_G/A             | 0.291 | 0.043 | 0.923 | 0.825 | 1.033  | 0.165 | 0.927 | Imputed |
| rs2489208   | 10:18494035_C/A             | 0.762 | 0.017 | 1.089 | 0.965 | 1.229  | 0.165 | 0.928 | Imputed |
| 10:18531047 | 10:18531047_T/A             | 0.018 | 1.000 | 1.335 | 0.887 | 2.010  | 0.166 | 0.818 | Imputed |
| rs78037940  | 10:18405906_C/G             | 0.103 | 0.485 | 1.129 | 0.951 | 1.341  | 0.166 | 0.930 | Imputed |
| rs117624222 | 10:18785935_T/C             | 0.034 | 0.783 | 0.813 | 0.607 | 1.089  | 0.166 | 0.887 | Imputed |
| rs76031173  | 10:18697293_G/A             | 0.243 | 0.966 | 0.919 | 0.816 | 1.036  | 0.166 | 0.971 | Imputed |
| rs146350076 | 10:18330843_C/CAT           | 0.046 | 0.473 | 0.845 | 0.665 | 1.073  | 0.166 | 0.992 | Imputed |
| rs74840474  | 10:18782696_T/G             | 0.034 | 0.784 | 0.814 | 0.609 | 1.089  | 0.166 | 0.887 | Imputed |
| rs6482437   | 10:18726326_A/C             | 0.870 | 0.889 | 0.899 | 0.774 | 1.045  | 0.166 | 0.985 | Imputed |
| rs61839211  | 10:18648463_A/G             | 0.034 | 0.041 | 0.813 | 0.606 | 1.090  | 0.166 | 0.841 | Imputed |
| rs191131842 | 10:18783402_C/A             | 0.033 | 0.784 | 0.815 | 0.609 | 1.090  | 0.168 | 0.894 | Imputed |
| rs117083321 | 10:18484754_T/C             | 0.017 | 0.602 | 1.347 | 0.882 | 2.058  | 0.168 | 0.797 | Imputed |
| rs7914038   | 10:18577425_G/T             | 0.199 | 0.000 | 0.911 | 0.797 | 1.040  | 0.168 | 0.882 | Imputed |
| rs3750592   | 10:18691018_G/A             | 0.528 | 0.486 | 0.931 | 0.841 | 1.031  | 0.168 | 0.977 | Imputed |
| rs34549950  | 10:18470718_AT/A            | 0.242 | 0.625 | 0.918 | 0.813 | 1.037  | 0.168 | 0.940 | Imputed |
| rs201055655 | 10:18777807_T/T/A           | 0.036 | 0.423 | 0.816 | 0.610 | 1.090  | 0.169 | 0.853 | Imputed |
| rs112077723 | 10:18779046_A/G             | 0.034 | 0.786 | 0.816 | 0.610 | 1.091  | 0.170 | 0.893 | Imputed |
| rs201899870 | 10:18473578_GTTTTTTTTT/G    | 0.992 | 1.000 | 0.634 | 0.331 | 1.215  | 0.170 | 0.719 | Imputed |
| rs10828233  | 10:18382876_T/G             | 0.161 | 0.952 | 0.906 | 0.788 | 1.043  | 0.170 | 0.947 | Imputed |
| rs117087373 | 10:18782375_G/A             | 0.033 | 0.784 | 0.815 | 0.609 | 1.091  | 0.170 | 0.896 | Imputed |
| rs142383184 | 10:18777396_T/A             | 0.034 | 0.786 | 0.816 | 0.610 | 1.091  | 0.170 | 0.895 | Imputed |
| rs113696199 | 10:18777201_G/A             | 0.034 | 0.786 | 0.816 | 0.610 | 1.091  | 0.170 | 0.895 | Imputed |
| rs117543533 | 10:18776928_G/A             | 0.034 | 0.786 | 0.816 | 0.610 | 1.091  | 0.170 | 0.895 | Imputed |
| rs12356676  | 10:18647504_A/G             | 0.731 | 1.000 | 0.923 | 0.822 | 1.035  | 0.170 | 0.964 | Imputed |
| rs79257059  | 10:18911074_G/A             | 0.037 | 1.000 | 0.810 | 0.599 | 1.095  | 0.170 | 0.769 | Imputed |
| rs142891959 | 10:18377112_AGTGATTCTTT/A   | 0.022 | 0.282 | 1.317 | 0.888 | 1.952  | 0.171 | 0.752 | Imputed |
| rs11012839  | 10:18448338_G/C             | 0.235 | 0.135 | 0.922 | 0.820 | 1.036  | 0.171 | 0.997 | Imputed |
| 10:18910966 | 10:18910966_GACACACACACAC/G | 0.009 | 0.153 | 0.656 | 0.358 | 1.201  | 0.171 | 0.709 | Imputed |
| rs116948859 | 10:18750415_G/C             | 0.033 | 0.799 | 1.219 | 0.918 | 1.618  | 0.172 | 0.965 | Imputed |
| rs10828677  | 10:18709808_A/C             | 0.215 | 0.451 | 1.089 | 0.963 | 1.231  | 0.172 | 0.977 | Imputed |
| rs11012350  | 10:18331992_G/A             | 0.047 | 0.473 | 0.847 | 0.667 | 1.076  | 0.174 | 0.989 | Imputed |

SUPPLEMENTARY DATA

|             |                     |       |       |       |       |       |       |       |           |
|-------------|---------------------|-------|-------|-------|-------|-------|-------|-------|-----------|
| rs144963887 | 10:18788357_C/T     | 0.046 | 0.027 | 0.825 | 0.626 | 1.089 | 0.174 | 0.738 | Imputed   |
| rs1779228   | 10:18474727_T/C     | 0.763 | 0.827 | 1.088 | 0.964 | 1.228 | 0.174 | 0.951 | Imputed   |
| rs10829009  | 10:18899868_T/C     | 0.323 | 0.971 | 1.080 | 0.966 | 1.207 | 0.175 | 0.936 | Imputed   |
| rs16916928  | 10:18470153_G/A     | 0.240 | 0.092 | 0.921 | 0.819 | 1.037 | 0.175 | 1.000 | Genotyped |
| rs35003945  | 10:18382714_GA/G    | 0.160 | 0.904 | 0.908 | 0.789 | 1.044 | 0.176 | 0.950 | Imputed   |
| rs11014494  | 10:18780705_C/A     | 0.524 | 0.506 | 0.931 | 0.840 | 1.032 | 0.176 | 0.968 | Imputed   |
| rs17604757  | 10:18442940_A/G     | 0.083 | 0.002 | 0.885 | 0.741 | 1.056 | 0.176 | 0.991 | Imputed   |
| rs200757952 | 10:18670617_CA/C    | 0.292 | 0.003 | 0.922 | 0.819 | 1.037 | 0.177 | 0.866 | Imputed   |
| rs11012832  | 10:18445483_C/T     | 0.236 | 0.125 | 0.923 | 0.822 | 1.037 | 0.178 | 1.000 | Genotyped |
| rs1277727   | 10:18485562_C/G     | 0.856 | 0.012 | 1.105 | 0.955 | 1.278 | 0.179 | 0.929 | Imputed   |
| rs185677818 | 10:18782530_C/T     | 0.035 | 0.061 | 0.819 | 0.612 | 1.096 | 0.179 | 0.895 | Imputed   |
| rs11012828  | 10:18442904_A/G     | 0.237 | 0.125 | 0.923 | 0.822 | 1.037 | 0.179 | 0.998 | Imputed   |
| rs2482099   | 10:18484261_T/C     | 0.857 | 0.012 | 1.105 | 0.955 | 1.278 | 0.180 | 0.930 | Imputed   |
| rs16917120  | 10:18555854_A/G     | 0.077 | 0.033 | 1.148 | 0.939 | 1.403 | 0.180 | 0.851 | Imputed   |
| rs5783585   | 10:18434342_AT/A    | 0.522 | 0.034 | 0.934 | 0.845 | 1.032 | 0.180 | 0.981 | Imputed   |
| rs74120238  | 10:18451689_G/A     | 0.236 | 0.058 | 0.923 | 0.822 | 1.038 | 0.180 | 0.996 | Imputed   |
| rs17661090  | 10:18373782_T/A     | 0.260 | 0.108 | 1.081 | 0.965 | 1.211 | 0.180 | 0.977 | Imputed   |
| rs201430440 | 10:18426013_C/CT    | 0.083 | 0.002 | 0.886 | 0.742 | 1.058 | 0.181 | 0.990 | Imputed   |
| rs11014484  | 10:18779324_G/C     | 0.416 | 0.770 | 0.932 | 0.840 | 1.033 | 0.181 | 0.963 | Imputed   |
| rs11594496  | 10:18445944_T/C     | 0.239 | 0.207 | 0.924 | 0.822 | 1.038 | 0.181 | 0.997 | Imputed   |
| rs35653909  | 10:18445859_T/C     | 0.241 | 0.192 | 0.924 | 0.822 | 1.038 | 0.181 | 0.994 | Imputed   |
| rs10828275  | 10:18443432_T/A     | 0.241 | 0.192 | 0.924 | 0.822 | 1.038 | 0.181 | 0.994 | Imputed   |
| rs67339282  | 10:18494423_TCTAA/T | 0.027 | 1.000 | 0.801 | 0.579 | 1.109 | 0.181 | 0.905 | Imputed   |
| rs12777936  | 10:18469956_C/T     | 0.238 | 0.164 | 0.922 | 0.819 | 1.039 | 0.182 | 0.994 | Imputed   |
| rs35822349  | 10:18373865_T/C     | 0.260 | 0.108 | 1.081 | 0.964 | 1.211 | 0.182 | 0.974 | Imputed   |
| rs150615943 | 10:18758354_C/CGA   | 0.033 | 0.793 | 0.822 | 0.617 | 1.097 | 0.183 | 0.922 | Imputed   |
| rs139986608 | 10:18886718_C/A     | 0.003 | 1.000 | 0.435 | 0.128 | 1.482 | 0.183 | 0.661 | Imputed   |
| rs17602947  | 10:18367576_A/G     | 0.279 | 0.001 | 1.079 | 0.964 | 1.208 | 0.185 | 0.929 | Imputed   |
| rs11012838  | 10:18448322_G/A     | 0.236 | 0.104 | 0.924 | 0.823 | 1.038 | 0.185 | 0.998 | Imputed   |
| rs993103    | 10:18543429_C/T     | 0.203 | 0.181 | 0.918 | 0.810 | 1.042 | 0.185 | 0.958 | Imputed   |
| rs1779235   | 10:18471274_A/G     | 0.240 | 0.092 | 0.923 | 0.820 | 1.039 | 0.185 | 0.994 | Imputed   |
| rs12359352  | 10:18413675_C/A     | 0.286 | 0.613 | 0.927 | 0.829 | 1.037 | 0.185 | 0.979 | Imputed   |
| rs202153248 | 10:18799242_G/GT    | 0.030 | 0.783 | 0.815 | 0.603 | 1.103 | 0.185 | 0.940 | Imputed   |
| rs11012674  | 10:18387689_G/A     | 0.100 | 0.851 | 0.888 | 0.744 | 1.059 | 0.185 | 0.887 | Imputed   |
| rs140192425 | 10:18761276_T/C     | 0.032 | 0.798 | 1.215 | 0.911 | 1.621 | 0.185 | 0.982 | Imputed   |
| rs74120216  | 10:18404273_C/T     | 0.133 | 0.676 | 1.108 | 0.952 | 1.289 | 0.186 | 0.938 | Imputed   |
| rs17608196  | 10:18536841_C/T     | 0.118 | 0.144 | 0.891 | 0.751 | 1.057 | 0.186 | 0.815 | Imputed   |
| rs11371305  | 10:18652878_AA/AT   | 0.246 | 0.000 | 1.088 | 0.960 | 1.233 | 0.186 | 0.860 | Imputed   |
| rs11012829  | 10:18444535_G/A     | 0.236 | 0.104 | 0.925 | 0.823 | 1.039 | 0.187 | 0.999 | Imputed   |
| rs150757464 | 10:18772382_C/T     | 0.034 | 0.787 | 0.822 | 0.615 | 1.099 | 0.187 | 0.891 | Imputed   |
| rs66746969  | 10:18669197_G/GT    | 0.252 | 0.585 | 1.080 | 0.963 | 1.212 | 0.187 | 0.998 | Imputed   |
| rs1277726   | 10:18486612_T/C     | 0.857 | 0.010 | 1.103 | 0.954 | 1.275 | 0.187 | 0.933 | Imputed   |
| rs61695381  | 10:18404830_C/T     | 0.133 | 0.728 | 1.107 | 0.952 | 1.288 | 0.187 | 0.940 | Imputed   |
| rs982003    | 10:18707296_C/T     | 0.742 | 0.149 | 0.924 | 0.823 | 1.039 | 0.187 | 0.977 | Imputed   |
| rs61839226  | 10:18669631_A/G     | 0.252 | 0.585 | 1.080 | 0.963 | 1.211 | 0.188 | 0.999 | Imputed   |
| rs10828617  | 10:18670205_A/G     | 0.252 | 0.585 | 1.080 | 0.963 | 1.211 | 0.188 | 0.999 | Imputed   |
| rs60865573  | 10:18405024_G/A     | 0.134 | 0.677 | 1.107 | 0.952 | 1.289 | 0.188 | 0.937 | Imputed   |
| rs1277760   | 10:18490448_C/T     | 0.856 | 0.031 | 1.102 | 0.954 | 1.274 | 0.188 | 0.939 | Imputed   |
| rs1277761   | 10:18490415_G/A     | 0.856 | 0.031 | 1.102 | 0.954 | 1.274 | 0.188 | 0.938 | Imputed   |
| rs11012830  | 10:18444576_G/C     | 0.236 | 0.104 | 0.925 | 0.823 | 1.039 | 0.188 | 0.998 | Imputed   |
| rs11012833  | 10:18445599_C/T     | 0.239 | 0.191 | 0.925 | 0.823 | 1.039 | 0.188 | 0.998 | Imputed   |
| rs1331330   | 10:18435016_C/T     | 0.528 | 0.061 | 0.935 | 0.847 | 1.033 | 0.188 | 0.987 | Imputed   |
| rs1929421   | 10:18445843_C/T     | 0.239 | 0.191 | 0.925 | 0.823 | 1.039 | 0.188 | 0.997 | Imputed   |
| rs10828616  | 10:18670017_G/A     | 0.252 | 0.585 | 1.080 | 0.963 | 1.211 | 0.188 | 1.000 | Genotyped |
| rs114435241 | 10:18439324_G/A     | 0.083 | 0.002 | 0.888 | 0.743 | 1.060 | 0.188 | 0.989 | Imputed   |
| rs117505500 | 10:18857401_T/C     | 0.037 | 1.000 | 0.819 | 0.609 | 1.102 | 0.188 | 0.799 | Imputed   |
| rs1125417   | 10:18488131_A/G     | 0.857 | 0.018 | 1.102 | 0.953 | 1.274 | 0.188 | 0.935 | Imputed   |
| rs2840320   | 10:18434190_C/G     | 0.529 | 0.061 | 0.935 | 0.847 | 1.033 | 0.189 | 0.985 | Imputed   |
| rs11352723  | 10:18500793_CT/C    | 0.852 | 0.017 | 1.100 | 0.954 | 1.269 | 0.190 | 0.944 | Imputed   |
| rs112117221 | 10:18781135_A/G     | 0.035 | 0.787 | 0.824 | 0.617 | 1.101 | 0.190 | 0.877 | Imputed   |
| rs1277757   | 10:18491956_A/C     | 0.857 | 0.031 | 1.101 | 0.953 | 1.272 | 0.191 | 0.943 | Imputed   |
| rs1277728   | 10:18483624_A/G     | 0.854 | 0.015 | 1.102 | 0.953 | 1.274 | 0.191 | 0.918 | Imputed   |
| rs116878285 | 10:18770991_G/T     | 0.033 | 0.790 | 0.824 | 0.617 | 1.102 | 0.192 | 0.907 | Imputed   |
| rs12360277  | 10:18419202_T/G     | 0.083 | 0.003 | 0.888 | 0.743 | 1.061 | 0.192 | 0.982 | Imputed   |
| rs11012692  | 10:18391765_A/G     | 0.052 | 0.588 | 0.854 | 0.673 | 1.083 | 0.193 | 0.896 | Imputed   |
| rs113042155 | 10:18781151_C/T     | 0.035 | 0.787 | 0.825 | 0.617 | 1.102 | 0.193 | 0.878 | Imputed   |
| rs12413195  | 10:18470329_T/C     | 0.221 | 0.185 | 0.922 | 0.816 | 1.042 | 0.193 | 0.988 | Imputed   |
| rs77564668  | 10:18780568_A/G     | 0.035 | 0.788 | 0.825 | 0.617 | 1.102 | 0.193 | 0.877 | Imputed   |
| rs79932317  | 10:18722605_T/TC    | 0.238 | 0.895 | 0.924 | 0.820 | 1.041 | 0.193 | 0.978 | Imputed   |
| rs10828984  | 10:18889653_T/C     | 0.327 | 0.587 | 1.076 | 0.963 | 1.203 | 0.193 | 0.935 | Imputed   |
| rs1300003   | 10:18487010_T/C     | 0.856 | 0.015 | 1.101 | 0.952 | 1.273 | 0.193 | 0.931 | Imputed   |
| rs113367034 | 10:18780284_G/A     | 0.035 | 0.788 | 0.825 | 0.617 | 1.102 | 0.193 | 0.878 | Imputed   |
| rs78188412  | 10:18708415_G/A     | 0.025 | 0.246 | 0.776 | 0.530 | 1.137 | 0.193 | 0.694 | Imputed   |
| rs4402184   | 10:18796583_C/T     | 0.355 | 0.287 | 1.073 | 0.965 | 1.193 | 0.193 | 0.982 | Imputed   |
| rs7915409   | 10:18419595_G/A     | 0.083 | 0.003 | 0.888 | 0.743 | 1.062 | 0.194 | 0.986 | Imputed   |
| rs7906351   | 10:18419477_T/G     | 0.083 | 0.003 | 0.888 | 0.743 | 1.062 | 0.194 | 0.985 | Imputed   |
| rs11014210  | 10:18722091_A/G     | 0.238 | 0.895 | 0.924 | 0.820 | 1.041 | 0.194 | 0.978 | Imputed   |
| rs11014209  | 10:18722046_G/A     | 0.238 | 0.895 | 0.924 | 0.820 | 1.041 | 0.194 | 0.978 | Imputed   |
| rs1757211   | 10:18471620_G/A     | 0.227 | 0.096 | 0.923 | 0.817 | 1.042 | 0.194 | 0.989 | Imputed   |
| rs75251137  | 10:18804523_T/A     | 0.030 | 0.783 | 0.819 | 0.606 | 1.107 | 0.194 | 0.940 | Imputed   |
| rs147160940 | 10:18770882_G/A     | 0.031 | 1.000 | 1.212 | 0.907 | 1.621 | 0.194 | 0.969 | Imputed   |
| rs73605725  | 10:18753377_G/T     | 0.034 | 0.788 | 0.825 | 0.618 | 1.103 | 0.194 | 0.905 | Imputed   |
| rs11014208  | 10:18721966_T/G     | 0.238 | 0.895 | 0.924 | 0.820 | 1.041 | 0.194 | 0.978 | Imputed   |
| rs117057316 | 10:18772499_A/G     | 0.031 | 1.000 | 1.212 | 0.906 | 1.622 | 0.195 | 0.966 | Imputed   |
| rs4488087   | 10:18767794_G/T     | 0.033 | 0.799 | 1.209 | 0.907 | 1.610 | 0.195 | 0.959 | Imputed   |
| rs7896004   | 10:18419330_C/T     | 0.149 | 0.182 | 1.098 | 0.953 | 1.265 | 0.195 | 0.961 | Imputed   |
| rs1277737   | 10:18574511_T/C     | 0.939 | 0.229 | 0.862 | 0.688 | 1.080 | 0.196 | 0.880 | Imputed   |
| rs10828269  | 10:18438572_G/C     | 0.527 | 0.173 | 0.937 | 0.848 | 1.034 | 0.196 | 0.992 | Imputed   |
| rs7903081   | 10:18373035_C/A     | 0.285 | 0.094 | 1.077 | 0.963 | 1.204 | 0.196 | 0.951 | Imputed   |
| rs10828277  | 10:18443726_T/C     | 0.527 | 0.163 | 0.937 | 0.848 | 1.034 | 0.197 | 0.994 | Imputed   |
| rs11014200  | 10:18719941_C/G     | 0.238 | 0.895 | 0.924 | 0.820 | 1.042 | 0.197 | 0.980 | Imputed   |
| rs72786093  | 10:18723124_T/G     | 0.238 | 1.000 | 0.924 | 0.820 | 1.042 | 0.197 | 0.978 | Imputed   |

## SUPPLEMENTARY DATA

|               |                     |       |       |       |       |       |       |       |           |
|---------------|---------------------|-------|-------|-------|-------|-------|-------|-------|-----------|
| rs59368188    | 10:18826157_T/A     | 0.036 | 1.000 | 0.826 | 0.619 | 1.104 | 0.197 | 0.858 | Imputed   |
| rs7902948     | 10:18372959_C/T     | 0.286 | 0.093 | 1.076 | 0.962 | 1.204 | 0.197 | 0.951 | Imputed   |
| rs10740993    | 10:18442482_C/T     | 0.527 | 0.194 | 0.937 | 0.849 | 1.034 | 0.197 | 1.000 | Genotyped |
| rs10828991    | 10:18894289_G/A     | 0.326 | 1.000 | 1.076 | 0.963 | 1.202 | 0.199 | 0.938 | Imputed   |
| rs1277758     | 10:18490930_G/A     | 0.857 | 0.037 | 1.100 | 0.951 | 1.272 | 0.199 | 0.934 | Imputed   |
| rs138426308   | 10:18752818_C/G     | 0.019 | 1.000 | 0.771 | 0.519 | 1.146 | 0.199 | 0.854 | Imputed   |
| rs2482119     | 10:18503661_C/T     | 0.060 | 0.339 | 1.162 | 0.924 | 1.461 | 0.199 | 0.845 | Imputed   |
| rs2489214     | 10:18602417_G/A     | 0.692 | 0.029 | 0.927 | 0.825 | 1.041 | 0.199 | 0.865 | Imputed   |
| rs1325988     | 10:18740606_C/T     | 0.687 | 0.047 | 0.932 | 0.837 | 1.038 | 0.199 | 0.979 | Imputed   |
| rs1277766     | 10:18498268_G/C     | 0.857 | 0.027 | 1.098 | 0.952 | 1.267 | 0.200 | 0.962 | Imputed   |
| rs12146379    | 10:18523028_G/C     | 0.030 | 0.302 | 0.812 | 0.589 | 1.117 | 0.201 | 0.843 | Imputed   |
| rs115582618   | 10:18852958_T/C     | 0.036 | 1.000 | 0.824 | 0.612 | 1.109 | 0.201 | 0.813 | Imputed   |
| rs1277725     | 10:18486857_G/T     | 0.855 | 0.015 | 1.099 | 0.951 | 1.270 | 0.202 | 0.928 | Imputed   |
| rs77499115    | 10:18715226_C/T     | 0.031 | 0.788 | 0.828 | 0.619 | 1.107 | 0.202 | 0.986 | Imputed   |
| rs183033527   | 10:18699756_A/G     | 0.050 | 0.445 | 1.176 | 0.916 | 1.510 | 0.202 | 0.867 | Imputed   |
| rs76909702    | 10:18713339_G/C     | 0.031 | 0.788 | 0.828 | 0.619 | 1.107 | 0.203 | 0.987 | Imputed   |
| rs1757218     | 10:18506741_G/C     | 0.804 | 0.034 | 1.089 | 0.955 | 1.241 | 0.203 | 0.920 | Imputed   |
| rs10764325    | 10:18440733_T/C     | 0.527 | 0.183 | 0.938 | 0.849 | 1.035 | 0.203 | 0.996 | Imputed   |
| rs60794926    | 10:18752520_T/G     | 0.033 | 0.788 | 0.828 | 0.620 | 1.107 | 0.203 | 0.918 | Imputed   |
| rs189575073   | 10:18925165_C/A     | 0.008 | 0.143 | 0.653 | 0.338 | 1.260 | 0.203 | 0.695 | Imputed   |
| rs111421894   | 10:18883370_G/T     | 0.297 | 0.004 | 1.078 | 0.960 | 1.210 | 0.204 | 0.894 | Imputed   |
| rs11013834    | 10:18650360_G/C     | 0.283 | 0.254 | 0.930 | 0.832 | 1.040 | 0.204 | 0.974 | Imputed   |
| rs10828276    | 10:18443616_C/A     | 0.083 | 0.002 | 0.892 | 0.747 | 1.065 | 0.204 | 0.990 | Imputed   |
| rs1277769     | 10:18499794_C/A     | 0.857 | 0.032 | 1.097 | 0.951 | 1.265 | 0.205 | 0.966 | Imputed   |
| rs1926026     | 10:18725659_G/A     | 0.873 | 0.431 | 0.906 | 0.779 | 1.055 | 0.205 | 0.986 | Imputed   |
| rs138480623   | 10:18854200_G/C     | 0.047 | 0.196 | 0.846 | 0.654 | 1.095 | 0.205 | 0.823 | Imputed   |
| rs10:18854203 | 10:18854203_A/T     | 0.047 | 0.196 | 0.846 | 0.654 | 1.095 | 0.205 | 0.823 | Imputed   |
| rs149177246   | 10:18854199_C/T     | 0.047 | 0.196 | 0.846 | 0.654 | 1.095 | 0.205 | 0.823 | Imputed   |
| rs11014188    | 10:18714546_G/A     | 0.238 | 0.792 | 0.926 | 0.822 | 1.043 | 0.205 | 0.982 | Imputed   |
| rs11014193    | 10:18716531_A/G     | 0.031 | 0.788 | 0.829 | 0.620 | 1.108 | 0.205 | 0.969 | Imputed   |
| rs142723540   | 10:18547624_G/A     | 0.002 | 1.000 | 2.009 | 0.682 | 5.915 | 0.205 | 0.854 | Imputed   |
| rs1277759     | 10:18490922_T/C     | 0.857 | 0.032 | 1.098 | 0.950 | 1.270 | 0.207 | 0.933 | Imputed   |
| rs139948483   | 10:18605384_T/C/T   | 0.141 | 0.497 | 0.906 | 0.777 | 1.056 | 0.207 | 0.870 | Imputed   |
| rs79819217    | 10:18439926_T/C     | 0.088 | 0.068 | 1.152 | 0.924 | 1.437 | 0.208 | 0.637 | Imputed   |
| rs7904976     | 10:18402179_A/G     | 0.540 | 0.045 | 0.936 | 0.845 | 1.037 | 0.208 | 0.940 | Imputed   |
| rs1757208     | 10:18472843_A/G     | 0.776 | 0.102 | 1.082 | 0.957 | 1.224 | 0.209 | 0.973 | Imputed   |
| rs7908718     | 10:18668475_C/T     | 0.233 | 0.894 | 1.079 | 0.958 | 1.216 | 0.209 | 0.992 | Imputed   |
| rs16917341    | 10:18719031_T/C     | 0.031 | 0.788 | 0.830 | 0.621 | 1.110 | 0.210 | 0.982 | Imputed   |
| rs117326495   | 10:18876822_C/T     | 0.019 | 1.000 | 0.771 | 0.514 | 1.157 | 0.210 | 0.804 | Imputed   |
| rs10741088    | 10:18795596_G/A     | 0.357 | 0.287 | 1.071 | 0.962 | 1.191 | 0.210 | 0.971 | Imputed   |
| rs75420886    | 10:18692365_G/T     | 0.032 | 0.788 | 0.829 | 0.618 | 1.112 | 0.210 | 0.928 | Imputed   |
| rs11593079    | 10:18398683_A/G     | 0.065 | 0.008 | 0.876 | 0.711 | 1.078 | 0.210 | 0.909 | Imputed   |
| rs199799963   | 10:18469380_C/CT    | 0.077 | 0.153 | 0.883 | 0.726 | 1.073 | 0.210 | 0.909 | Imputed   |
| rs11818244    | 10:18728328_T/C     | 0.031 | 0.790 | 0.831 | 0.622 | 1.111 | 0.211 | 0.972 | Imputed   |
| rs73593708    | 10:18419188_G/A     | 0.136 | 0.423 | 1.098 | 0.948 | 1.271 | 0.211 | 0.976 | Imputed   |
| rs1277764     | 10:18496403_A/G     | 0.858 | 0.022 | 1.096 | 0.949 | 1.266 | 0.211 | 0.954 | Imputed   |
| rs117299889   | 10:18404550_T/C     | 0.067 | 0.003 | 0.878 | 0.716 | 1.077 | 0.211 | 0.909 | Imputed   |
| rs10741089    | 10:18795721_T/G     | 0.445 | 0.632 | 1.069 | 0.963 | 1.186 | 0.211 | 0.948 | Imputed   |
| rs11014369    | 10:18757216_A/G     | 0.079 | 0.432 | 0.887 | 0.734 | 1.071 | 0.211 | 0.940 | Imputed   |
| rs10734038    | 10:18436515_C/T     | 0.527 | 0.071 | 0.939 | 0.850 | 1.037 | 0.212 | 0.989 | Imputed   |
| rs11013698    | 10:18626216_G/A     | 0.255 | 0.400 | 0.927 | 0.823 | 1.044 | 0.212 | 0.930 | Imputed   |
| rs78496751    | 10:18868982_G/T     | 0.019 | 1.000 | 0.772 | 0.514 | 1.160 | 0.213 | 0.804 | Imputed   |
| rs11013339    | 10:18574101_C/G     | 0.074 | 0.013 | 1.142 | 0.927 | 1.406 | 0.213 | 0.823 | Imputed   |
| rs12261375    | 10:18550887_T/C     | 0.083 | 0.011 | 1.129 | 0.932 | 1.368 | 0.213 | 0.859 | Imputed   |
| rs11014175    | 10:18712285_C/T     | 0.238 | 0.759 | 0.927 | 0.823 | 1.044 | 0.214 | 0.984 | Imputed   |
| rs7095057     | 10:18725985_T/C     | 0.873 | 0.431 | 0.908 | 0.780 | 1.057 | 0.214 | 0.987 | Imputed   |
| rs59261128    | 10:18729432_G/A     | 0.031 | 0.790 | 0.832 | 0.622 | 1.112 | 0.214 | 0.974 | Imputed   |
| rs35482639    | 10:18764588_A/C     | 0.147 | 0.088 | 1.095 | 0.949 | 1.265 | 0.215 | 0.987 | Imputed   |
| rs10740995    | 10:18445088_G/A     | 0.526 | 0.136 | 0.939 | 0.851 | 1.037 | 0.215 | 0.995 | Imputed   |
| rs139276863   | 10:18369310_T/TTATA | 0.310 | 0.025 | 1.073 | 0.960 | 1.199 | 0.215 | 0.922 | Imputed   |
| rs59515030    | 10:18730712_C/T     | 0.031 | 0.790 | 0.832 | 0.623 | 1.113 | 0.215 | 0.975 | Imputed   |
| rs71497247    | 10:18763343_C/G     | 0.147 | 0.066 | 1.095 | 0.949 | 1.264 | 0.215 | 0.990 | Imputed   |
| rs113981135   | 10:18629580_G/A     | 0.003 | 1.000 | 0.464 | 0.137 | 1.568 | 0.216 | 0.635 | Imputed   |
| rs74121221    | 10:18732282_T/A     | 0.031 | 0.790 | 0.833 | 0.623 | 1.113 | 0.217 | 0.978 | Imputed   |
| rs192204152   | 10:18715753_A/G     | 0.022 | 1.000 | 1.246 | 0.879 | 1.765 | 0.217 | 0.975 | Imputed   |
| rs28422908    | 10:18761235_G/T     | 0.033 | 0.628 | 1.195 | 0.900 | 1.587 | 0.217 | 0.976 | Imputed   |
| rs76772953    | 10:18629158_A/G     | 0.045 | 1.000 | 0.848 | 0.652 | 1.102 | 0.217 | 0.842 | Imputed   |
| rs74121223    | 10:18732302_A/T     | 0.031 | 0.790 | 0.833 | 0.623 | 1.113 | 0.217 | 0.977 | Imputed   |
| rs2799572     | 10:18645869_T/G     | 0.794 | 0.000 | 1.089 | 0.951 | 1.248 | 0.218 | 0.824 | Imputed   |
| rs16917323    | 10:18706638_A/G     | 0.031 | 0.788 | 0.833 | 0.624 | 1.114 | 0.218 | 0.979 | Imputed   |
| rs12355077    | 10:18477279_G/C     | 0.045 | 0.184 | 0.855 | 0.667 | 1.097 | 0.218 | 0.932 | Imputed   |
| rs113779616   | 10:18754045_G/A     | 0.032 | 0.790 | 0.833 | 0.623 | 1.114 | 0.218 | 0.956 | Imputed   |
| rs147240875   | 10:18537960_C/T     | 0.002 | 1.000 | 1.966 | 0.669 | 5.775 | 0.219 | 0.858 | Imputed   |
| rs60758986    | 10:18780013_T/C     | 0.342 | 0.477 | 0.933 | 0.834 | 1.042 | 0.219 | 0.905 | Imputed   |
| rs78683661    | 10:18743801_C/T     | 0.031 | 0.790 | 0.834 | 0.624 | 1.114 | 0.219 | 0.981 | Imputed   |
| rs61418170    | 10:18646780_C/G     | 0.201 | 0.167 | 0.925 | 0.816 | 1.048 | 0.220 | 0.980 | Imputed   |
| rs10764476    | 10:18707149_G/A     | 0.196 | 0.960 | 1.083 | 0.953 | 1.231 | 0.220 | 0.974 | Imputed   |
| rs8181477     | 10:18782880_A/C     | 0.473 | 0.590 | 0.939 | 0.849 | 1.038 | 0.220 | 0.999 | Genotyped |
| rs12355980    | 10:18474726_A/G     | 0.044 | 0.186 | 0.856 | 0.668 | 1.097 | 0.220 | 0.943 | Imputed   |
| rs75724947    | 10:18706059_T/C     | 0.031 | 0.788 | 0.834 | 0.624 | 1.115 | 0.220 | 0.982 | Imputed   |
| rs4748471     | 10:18768395_T/C     | 0.148 | 0.079 | 1.094 | 0.947 | 1.264 | 0.221 | 0.979 | Imputed   |
| rs11813051    | 10:18743060_G/T     | 0.031 | 0.790 | 0.835 | 0.625 | 1.115 | 0.221 | 0.984 | Imputed   |
| rs12269065    | 10:18620071_T/C     | 0.256 | 0.004 | 0.930 | 0.828 | 1.045 | 0.221 | 0.942 | Imputed   |
| rs11592092    | 10:18769904_C/T     | 0.148 | 0.079 | 1.094 | 0.947 | 1.264 | 0.221 | 0.976 | Imputed   |
| rs10764487    | 10:18721946_T/C     | 0.197 | 0.960 | 1.083 | 0.953 | 1.231 | 0.222 | 0.973 | Imputed   |
| rs140766681   | 10:18409497_A/C     | 0.037 | 0.071 | 0.850 | 0.656 | 1.103 | 0.222 | 0.994 | Imputed   |
| rs7096168     | 10:18693174_T/A     | 0.262 | 0.869 | 0.930 | 0.828 | 1.045 | 0.223 | 0.973 | Imputed   |
| rs73597558    | 10:18531982_A/T     | 0.026 | 0.279 | 0.812 | 0.582 | 1.135 | 0.223 | 0.896 | Imputed   |
| rs11595814    | 10:18449180_A/G     | 0.161 | 0.052 | 0.919 | 0.803 | 1.052 | 0.223 | 0.989 | Imputed   |
| rs11014429    | 10:18767151_A/G     | 0.033 | 0.628 | 1.193 | 0.898 | 1.584 | 0.223 | 0.968 | Imputed   |
| rs16917320    | 10:18704550_G/T     | 0.031 | 0.788 | 0.835 | 0.625 | 1.116 | 0.224 | 0.982 | Imputed   |
| rs142220999   | 10:18765378_C/T     | 0.005 | 1.000 | 1.587 | 0.754 | 3.343 | 0.224 | 0.845 | Imputed   |

SUPPLEMENTARY DATA

|             |                                  |       |       |       |       |        |       |       |           |
|-------------|----------------------------------|-------|-------|-------|-------|--------|-------|-------|-----------|
| rs77525349  | 10:18704863_T/G                  | 0.031 | 0.788 | 0.836 | 0.625 | 1.116  | 0.224 | 0.982 | Imputed   |
| rs7090405   | 10:18459561_G/A                  | 0.258 | 0.172 | 0.932 | 0.832 | 1.044  | 0.224 | 0.994 | Imputed   |
| rs11012864  | 10:18461926_T/C                  | 0.260 | 0.077 | 0.932 | 0.832 | 1.044  | 0.225 | 0.983 | Imputed   |
| rs112646070 | 10:18622797_C/CT                 | 0.161 | 0.513 | 0.916 | 0.795 | 1.056  | 0.225 | 0.921 | Imputed   |
| rs147301321 | 10:18784295_T/C                  | 0.032 | 0.782 | 1.199 | 0.894 | 1.607  | 0.225 | 0.925 | Imputed   |
| rs137984751 | 10:18520882_A/G                  | 0.025 | 0.519 | 0.818 | 0.591 | 1.132  | 0.225 | 0.964 | Imputed   |
| rs16917315  | 10:18704458_A/T                  | 0.031 | 0.788 | 0.836 | 0.626 | 1.117  | 0.226 | 0.984 | Imputed   |
| rs7081271   | 10:18872699_T/C                  | 0.837 | 0.683 | 1.093 | 0.946 | 1.262  | 0.226 | 0.895 | Imputed   |
| rs149849586 | 10:18785057_G/A                  | 0.032 | 0.781 | 1.199 | 0.894 | 1.608  | 0.226 | 0.924 | Imputed   |
| rs372663354 | 10:18787003_AAC/A                | 0.032 | 0.777 | 1.200 | 0.893 | 1.611  | 0.226 | 0.921 | Imputed   |
| rs7077250   | 10:18774097_C/T                  | 0.148 | 0.148 | 1.093 | 0.946 | 1.264  | 0.226 | 0.966 | Imputed   |
| rs61841963  | 10:18714592_G/A                  | 0.197 | 0.881 | 1.082 | 0.952 | 1.229  | 0.226 | 0.976 | Imputed   |
| rs12262789  | 10:18735381_C/T                  | 0.031 | 0.790 | 0.836 | 0.626 | 1.117  | 0.226 | 0.985 | Imputed   |
| rs143613719 | 10:18371967_C/CTGTCTCTCTGTCTCTGT |       |       |       |       |        |       |       |           |
| rs77963678  | CTGTCTCTGTCT                     | 0.351 | 0.000 | 0.932 | 0.832 | 1.044  | 0.226 | 0.840 | Imputed   |
| rs77963678  | 10:18482561_T/C                  | 0.079 | 0.233 | 0.884 | 0.724 | 1.080  | 0.227 | 0.876 | Imputed   |
| rs200332006 | 10:18784492_G/GTT                | 0.032 | 0.781 | 1.198 | 0.894 | 1.607  | 0.227 | 0.926 | Imputed   |
| rs66483306  | 10:18610942_A/G                  | 0.275 | 0.163 | 0.930 | 0.826 | 1.047  | 0.227 | 0.894 | Imputed   |
| rs201976718 | 10:18460449_A/AG                 | 0.258 | 0.172 | 0.932 | 0.832 | 1.045  | 0.227 | 0.992 | Imputed   |
| rs1779225   | 10:18546469_G/A                  | 0.996 | 1.000 | 0.602 | 0.264 | 1.371  | 0.227 | 0.902 | Imputed   |
| rs61841962  | 10:18714383_C/T                  | 0.197 | 0.881 | 1.082 | 0.952 | 1.229  | 0.228 | 0.976 | Imputed   |
| rs35993778  | 10:18768629_G/T                  | 0.161 | 0.675 | 1.090 | 0.948 | 1.254  | 0.228 | 0.952 | Imputed   |
| rs118117346 | 10:18431873_G/T                  | 0.024 | 0.732 | 0.814 | 0.582 | 1.138  | 0.228 | 0.952 | Imputed   |
| rs7097430   | 10:18775255_A/G                  | 0.149 | 0.148 | 1.093 | 0.946 | 1.264  | 0.228 | 0.963 | Imputed   |
| rs140271617 | 10:18687005_C/T                  | 0.005 | 0.080 | 1.666 | 0.726 | 3.825  | 0.229 | 0.750 | Imputed   |
| rs11012689  | 10:18390606_C/T                  | 0.100 | 0.641 | 0.898 | 0.755 | 1.070  | 0.229 | 0.898 | Imputed   |
| rs148400819 | 10:18739755_C/T                  | 0.031 | 0.790 | 0.837 | 0.626 | 1.118  | 0.229 | 0.992 | Imputed   |
| rs144309742 | 10:18742581_C/T                  | 0.031 | 0.790 | 0.837 | 0.626 | 1.119  | 0.229 | 0.991 | Imputed   |
| rs10828240  | 10:18390323_G/T                  | 0.228 | 0.040 | 0.926 | 0.817 | 1.050  | 0.229 | 0.889 | Imputed   |
| rs117943270 | 10:18748417_A/T                  | 0.031 | 0.788 | 0.837 | 0.626 | 1.119  | 0.230 | 0.979 | Imputed   |
| rs7081068   | 10:18731093_A/T                  | 0.338 | 0.595 | 0.937 | 0.842 | 1.042  | 0.230 | 0.988 | Imputed   |
| rs1757210   | 10:18472566_A/G                  | 0.237 | 0.175 | 0.929 | 0.823 | 1.048  | 0.230 | 0.969 | Imputed   |
| rs146239374 | 10:18509684_C/G                  | 0.025 | 0.519 | 0.819 | 0.591 | 1.135  | 0.231 | 0.969 | Imputed   |
| rs78308623  | 10:18504035_T/TTC                | 0.859 | 0.010 | 1.093 | 0.945 | 1.263  | 0.231 | 0.951 | Imputed   |
| rs12246028  | 10:18774007_G/T                  | 0.032 | 1.000 | 1.194 | 0.893 | 1.595  | 0.231 | 0.945 | Imputed   |
| rs11014455  | 10:18774989_C/A                  | 0.032 | 1.000 | 1.194 | 0.893 | 1.595  | 0.232 | 0.943 | Imputed   |
| rs12243784  | 10:18772901_G/C                  | 0.032 | 0.798 | 1.193 | 0.893 | 1.593  | 0.233 | 0.948 | Imputed   |
| rs7067620   | 10:18772085_C/G                  | 0.033 | 0.798 | 1.192 | 0.893 | 1.592  | 0.233 | 0.948 | Imputed   |
| rs150353816 | 10:18406089_G/T                  | 0.004 | 0.043 | 1.642 | 0.727 | 3.707  | 0.233 | 0.916 | Imputed   |
| 10:18457426 | 10:18457426_T/TTGTGTGTGTG        | 0.025 | 1.000 | 1.228 | 0.876 | 1.722  | 0.233 | 0.926 | Imputed   |
| rs111401264 | 10:18457426_T/TTGTGTGTGTG        | 0.025 | 1.000 | 1.228 | 0.876 | 1.722  | 0.233 | 0.926 | Imputed   |
| rs11014496  | 10:18781284_T/G                  | 0.033 | 0.791 | 1.194 | 0.892 | 1.598  | 0.234 | 0.930 | Imputed   |
| rs41383652  | 10:18611677_G/A                  | 0.275 | 0.176 | 0.931 | 0.827 | 1.048  | 0.234 | 0.897 | Imputed   |
| rs11012877  | 10:18466378_G/A                  | 0.108 | 0.002 | 0.909 | 0.776 | 1.064  | 0.234 | 0.991 | Imputed   |
| rs10764481  | 10:18713425_A/T                  | 0.197 | 0.881 | 1.080 | 0.951 | 1.227  | 0.234 | 0.978 | Imputed   |
| rs11014084  | 10:18692597_A/G                  | 0.262 | 0.967 | 0.932 | 0.830 | 1.047  | 0.237 | 0.973 | Imputed   |
| rs112972871 | 10:18635883_T/A                  | 0.002 | 1.000 | 0.470 | 0.134 | 1.642  | 0.237 | 0.773 | Imputed   |
| rs11592688  | 10:18422535_T/G                  | 0.143 | 0.562 | 0.917 | 0.795 | 1.058  | 0.237 | 0.993 | Imputed   |
| rs71497233  | 10:18423082_G/A                  | 0.143 | 0.562 | 0.917 | 0.795 | 1.058  | 0.237 | 0.993 | Imputed   |
| rs143655478 | 10:18892710_A/G                  | 0.007 | 0.064 | 0.652 | 0.321 | 1.325  | 0.238 | 0.687 | Imputed   |
| rs1419252   | 10:18591380_G/A                  | 0.276 | 0.001 | 0.930 | 0.824 | 1.049  | 0.238 | 0.860 | Imputed   |
| rs189388095 | 10:18521037_T/A                  | 0.012 | 0.369 | 1.344 | 0.823 | 2.194  | 0.238 | 0.870 | Imputed   |
| rs191733970 | 10:18895214_T/G                  | 0.012 | 1.000 | 1.333 | 0.827 | 2.150  | 0.238 | 0.898 | Imputed   |
| rs188115526 | 10:18642575_G/A                  | 0.005 | 1.000 | 1.658 | 0.716 | 3.841  | 0.238 | 0.659 | Imputed   |
| rs12779075  | 10:18427010_G/A                  | 0.143 | 0.519 | 0.918 | 0.795 | 1.059  | 0.239 | 0.989 | Imputed   |
| rs138435632 | 10:18696912_G/C                  | 0.003 | 1.000 | 1.962 | 0.640 | 6.018  | 0.239 | 0.766 | Imputed   |
| rs7069147   | 10:18768236_G/C                  | 0.032 | 0.798 | 1.189 | 0.891 | 1.585  | 0.239 | 0.961 | Imputed   |
| rs145607803 | 10:18690508_A/G                  | 0.003 | 1.000 | 1.956 | 0.638 | 5.997  | 0.241 | 0.768 | Imputed   |
| rs11429403  | 10:18382870_C/CT                 | 0.054 | 0.064 | 0.865 | 0.679 | 1.102  | 0.241 | 0.820 | Imputed   |
| rs117942795 | 10:18580346_G/A                  | 0.004 | 1.000 | 1.818 | 0.669 | 4.937  | 0.241 | 0.728 | Imputed   |
| rs11014422  | 10:18765345_C/T                  | 0.032 | 0.800 | 1.186 | 0.891 | 1.580  | 0.242 | 0.972 | Imputed   |
| rs79020486  | 10:18433664_A/G                  | 0.043 | 0.331 | 0.864 | 0.675 | 1.104  | 0.242 | 0.979 | Imputed   |
| rs76129954  | 10:18433635_T/C                  | 0.043 | 0.331 | 0.864 | 0.675 | 1.104  | 0.242 | 0.980 | Imputed   |
| rs191858865 | 10:18684773_G/A                  | 0.003 | 1.000 | 1.950 | 0.636 | 5.974  | 0.243 | 0.769 | Imputed   |
| rs7069923   | 10:18730368_C/T                  | 0.326 | 0.389 | 1.066 | 0.958 | 1.187  | 0.243 | 1.000 | Genotyped |
| rs11014423  | 10:18765353_C/T                  | 0.033 | 0.800 | 1.186 | 0.891 | 1.580  | 0.243 | 0.969 | Imputed   |
| rs78399549  | 10:18555241_A/G                  | 0.003 | 1.000 | 2.040 | 0.617 | 6.744  | 0.243 | 0.617 | Imputed   |
| 10:18543995 | 10:18543995_GT/AT                | 0.001 | 1.000 | 2.686 | 0.512 | 14.107 | 0.243 | 0.851 | Imputed   |
| rs116900277 | 10:18390401_T/C                  | 0.016 | 1.000 | 1.303 | 0.835 | 2.032  | 0.243 | 0.804 | Imputed   |
| rs75380606  | 10:18702073_G/A                  | 0.031 | 0.427 | 0.842 | 0.631 | 1.124  | 0.243 | 0.984 | Imputed   |
| rs11012655  | 10:18381684_G/A                  | 0.046 | 0.564 | 0.864 | 0.675 | 1.105  | 0.244 | 0.931 | Imputed   |
| rs4644567   | 10:18746675_T/C                  | 0.998 | 1.000 | 0.347 | 0.058 | 2.059  | 0.244 | 0.653 | Imputed   |
| rs75232624  | 10:18415527_C/T                  | 0.095 | 0.165 | 0.902 | 0.758 | 1.073  | 0.245 | 0.947 | Imputed   |
| rs11012843  | 10:18451380_A/G                  | 0.157 | 0.231 | 0.922 | 0.805 | 1.057  | 0.245 | 1.000 | Genotyped |
| rs2489221   | 10:18547378_C/T                  | 0.180 | 0.259 | 0.926 | 0.813 | 1.054  | 0.245 | 0.985 | Imputed   |
| rs188491546 | 10:18526835_A/G                  | 0.012 | 0.369 | 1.334 | 0.820 | 2.171  | 0.246 | 0.872 | Imputed   |
| rs140897419 | 10:18437018_G/GT                 | 0.158 | 0.048 | 1.084 | 0.946 | 1.243  | 0.246 | 0.971 | Imputed   |
| rs10579235  | 10:18900652_GGTGTGT/GGTGT        | 0.286 | 0.009 | 0.933 | 0.830 | 1.049  | 0.246 | 0.882 | Imputed   |
| rs7896075   | 10:18638273_G/A                  | 0.174 | 0.014 | 0.925 | 0.811 | 1.055  | 0.246 | 0.972 | Imputed   |
| rs11596252  | 10:18755989_A/G                  | 0.143 | 1.000 | 1.091 | 0.942 | 1.263  | 0.246 | 0.956 | Imputed   |
| rs72786085  | 10:18713206_G/C                  | 0.052 | 0.106 | 0.857 | 0.660 | 1.113  | 0.247 | 0.751 | Imputed   |
| rs78276141  | 10:18701166_G/A                  | 0.031 | 0.427 | 0.844 | 0.632 | 1.126  | 0.248 | 0.979 | Imputed   |
| rs11012781  | 10:18424093_C/T                  | 0.043 | 0.333 | 0.865 | 0.677 | 1.106  | 0.248 | 0.980 | Imputed   |
| rs12360236  | 10:18424104_G/A                  | 0.043 | 0.333 | 0.865 | 0.677 | 1.106  | 0.248 | 0.980 | Imputed   |
| rs117265307 | 10:18591981_G/C                  | 0.001 | 1.000 | 2.600 | 0.514 | 13.154 | 0.248 | 0.722 | Imputed   |
| rs7097315   | 10:18773785_G/A                  | 0.658 | 0.342 | 1.065 | 0.957 | 1.186  | 0.248 | 0.955 | Imputed   |
| rs138706501 | 10:18552938_C/T                  | 0.011 | 1.000 | 0.734 | 0.435 | 1.241  | 0.249 | 0.827 | Imputed   |
| rs114765485 | 10:18700763_A/G                  | 0.031 | 0.597 | 0.844 | 0.633 | 1.126  | 0.249 | 0.981 | Imputed   |
| rs11014504  | 10:18783988_T/C                  | 0.456 | 0.656 | 0.942 | 0.851 | 1.043  | 0.249 | 0.983 | Imputed   |
| rs116771224 | 10:18700760_T/C                  | 0.031 | 0.597 | 0.844 | 0.633 | 1.126  | 0.249 | 0.981 | Imputed   |
| rs58090855  | 10:18555583_C/T                  | 0.066 | 0.069 | 1.139 | 0.913 | 1.420  | 0.249 | 0.822 | Imputed   |
| rs11014432  | 10:18768344_C/G                  | 0.030 | 0.047 | 1.205 | 0.877 | 1.654  | 0.250 | 0.828 | Imputed   |

## SUPPLEMENTARY DATA

|             |                       |       |       |       |       |        |       |       |           |
|-------------|-----------------------|-------|-------|-------|-------|--------|-------|-------|-----------|
| rs140650543 | 10:18499749_A/C       | 0.004 | 1.000 | 1.744 | 0.677 | 4.495  | 0.250 | 0.630 | Imputed   |
| rs140776963 | 10:18727655_A/G       | 0.030 | 0.786 | 0.840 | 0.625 | 1.130  | 0.250 | 0.982 | Imputed   |
| rs75170098  | 10:18436011_C/G       | 0.001 | 1.000 | 2.739 | 0.492 | 15.239 | 0.250 | 0.711 | Imputed   |
| rs150681224 | 10:18521591_C/T       | 0.002 | 1.000 | 1.864 | 0.645 | 5.386  | 0.250 | 0.874 | Imputed   |
| rs1952984   | 10:18466582_C/T       | 0.109 | 0.002 | 0.912 | 0.778 | 1.068  | 0.251 | 0.983 | Imputed   |
| rs189650495 | 10:18512411_A/C       | 0.002 | 1.000 | 1.866 | 0.643 | 5.416  | 0.251 | 0.852 | Imputed   |
| rs185088737 | 10:18475475_G/C       | 0.005 | 1.000 | 1.533 | 0.739 | 3.180  | 0.251 | 0.967 | Imputed   |
| rs11013413  | 10:18586483_T/A       | 0.035 | 0.085 | 0.847 | 0.637 | 1.125  | 0.252 | 0.911 | Imputed   |
| 10:18509657 | 10:18509657_A/G       | 0.012 | 0.335 | 1.336 | 0.814 | 2.194  | 0.252 | 0.860 | Imputed   |
| rs11013308  | 10:18568777_G/A       | 0.034 | 0.335 | 0.848 | 0.641 | 1.124  | 0.252 | 0.948 | Imputed   |
| rs4747342   | 10:18619782_G/A       | 0.026 | 0.040 | 1.224 | 0.866 | 1.730  | 0.252 | 0.800 | Imputed   |
| rs1998822   | 10:18755664_A/G       | 0.291 | 0.698 | 1.070 | 0.953 | 1.201  | 0.253 | 0.930 | Imputed   |
| rs72786094  | 10:18725099_A/G       | 0.025 | 0.706 | 1.231 | 0.862 | 1.757  | 0.253 | 0.830 | Imputed   |
| rs188238097 | 10:18541427_C/A       | 0.042 | 0.321 | 1.161 | 0.899 | 1.501  | 0.253 | 0.976 | Imputed   |
| rs11593936  | 10:18647836_C/T       | 0.022 | 0.023 | 1.230 | 0.862 | 1.756  | 0.253 | 0.896 | Imputed   |
| rs74440383  | 10:18580014_G/A       | 0.034 | 0.212 | 0.848 | 0.639 | 1.125  | 0.253 | 0.942 | Imputed   |
| rs144286491 | 10:18773881_G/A       | 0.018 | 0.369 | 0.775 | 0.501 | 1.200  | 0.253 | 0.728 | Imputed   |
| rs76916439  | 10:18372498_A/T       | 0.066 | 0.037 | 0.885 | 0.717 | 1.092  | 0.253 | 0.886 | Imputed   |
| rs11595359  | 10:18648119_T/G       | 0.022 | 0.023 | 1.230 | 0.862 | 1.755  | 0.253 | 0.896 | Imputed   |
| rs72780090  | 10:18389363_A/G       | 0.051 | 0.405 | 0.874 | 0.693 | 1.102  | 0.253 | 0.954 | Imputed   |
| rs61840847  | 10:18900775_C/T       | 0.271 | 0.014 | 0.934 | 0.831 | 1.050  | 0.254 | 0.916 | Imputed   |
| rs59709475  | 10:18622371_T/T/A     | 0.156 | 0.144 | 0.915 | 0.784 | 1.067  | 0.256 | 0.812 | Imputed   |
| rs4748447   | 10:18591861_T/C       | 0.656 | 0.000 | 0.936 | 0.834 | 1.050  | 0.257 | 0.839 | Imputed   |
| rs1277730   | 10:18482191_G/C       | 0.914 | 0.064 | 1.113 | 0.925 | 1.341  | 0.257 | 0.899 | Imputed   |
| rs117823144 | 10:18869921_A/G       | 0.012 | 1.000 | 1.387 | 0.787 | 2.443  | 0.258 | 0.602 | Imputed   |
| rs137880590 | 10:18410121_C/T       | 0.001 | 1.000 | 2.633 | 0.492 | 14.078 | 0.258 | 0.714 | Imputed   |
| rs75935235  | 10:18698493_C/G       | 0.031 | 0.600 | 0.848 | 0.637 | 1.129  | 0.258 | 0.988 | Imputed   |
| rs7897710   | 10:18505529_T/A       | 0.081 | 0.656 | 0.895 | 0.739 | 1.085  | 0.258 | 0.922 | Imputed   |
| rs74117923  | 10:18519223_T/C       | 0.006 | 1.000 | 1.596 | 0.710 | 3.589  | 0.258 | 0.734 | Imputed   |
| rs144777190 | 10:18922357_T/A       | 0.029 | 1.000 | 0.835 | 0.610 | 1.142  | 0.258 | 0.906 | Imputed   |
| rs190277537 | 10:18575339_C/A       | 0.011 | 1.000 | 0.742 | 0.441 | 1.246  | 0.259 | 0.850 | Imputed   |
| rs11012640  | 10:18379727_C/T       | 0.097 | 0.026 | 0.898 | 0.744 | 1.083  | 0.259 | 0.806 | Imputed   |
| rs11012867  | 10:18463371_C/T       | 0.252 | 0.064 | 0.936 | 0.834 | 1.050  | 0.260 | 0.979 | Imputed   |
| rs2150694   | 10:18454327_C/A       | 0.155 | 0.145 | 0.924 | 0.806 | 1.060  | 0.260 | 0.995 | Imputed   |
| rs11012995  | 10:18495110_A/G       | 0.019 | 0.357 | 0.804 | 0.551 | 1.175  | 0.260 | 0.902 | Imputed   |
| rs2497823   | 10:18371095_C/T       | 0.199 | 0.163 | 0.928 | 0.813 | 1.058  | 0.261 | 0.902 | Imputed   |
| rs7895735   | 10:18419126_C/T       | 0.562 | 0.023 | 0.945 | 0.855 | 1.044  | 0.262 | 0.986 | Imputed   |
| rs12570727  | 10:18425519_G/A       | 0.520 | 0.050 | 0.945 | 0.856 | 1.043  | 0.262 | 0.990 | Imputed   |
| rs7074587   | 10:18383631_A/G       | 0.431 | 0.020 | 1.064 | 0.955 | 1.185  | 0.262 | 0.866 | Imputed   |
| rs61839230  | 10:18680837_A/C       | 0.257 | 0.618 | 0.935 | 0.831 | 1.052  | 0.262 | 0.960 | Imputed   |
| rs150214686 | 10:18825202_TGG/GGG   | 0.049 | 0.152 | 0.866 | 0.674 | 1.113  | 0.262 | 0.839 | Imputed   |
| rs141978206 | 10:18825201_T/G       | 0.049 | 0.152 | 0.866 | 0.674 | 1.113  | 0.262 | 0.839 | Imputed   |
| rs11012783  | 10:18425418_A/G       | 0.522 | 0.034 | 0.945 | 0.856 | 1.043  | 0.262 | 0.990 | Imputed   |
| rs189348142 | 10:18421951_C/T       | 0.008 | 0.143 | 0.691 | 0.362 | 1.319  | 0.263 | 0.704 | Imputed   |
| rs142301667 | 10:18848767_G/A       | 0.007 | 0.098 | 0.670 | 0.332 | 1.351  | 0.263 | 0.742 | Imputed   |
| rs77829924  | 10:18699073_G/A       | 0.031 | 0.600 | 0.849 | 0.637 | 1.131  | 0.263 | 0.990 | Imputed   |
| rs11014520  | 10:18789298_T/C       | 0.127 | 0.270 | 0.915 | 0.784 | 1.069  | 0.263 | 0.934 | Imputed   |
| rs11599858  | 10:18375540_G/C       | 0.265 | 0.021 | 1.066 | 0.953 | 1.191  | 0.264 | 0.991 | Imputed   |
| rs76903906  | 10:18886370_A/T       | 0.005 | 1.000 | 0.658 | 0.316 | 1.372  | 0.264 | 0.883 | Imputed   |
| rs185917343 | 10:18765940_T/C       | 0.030 | 0.786 | 0.844 | 0.626 | 1.137  | 0.265 | 0.972 | Imputed   |
| rs16917309  | 10:18702252_G/A       | 0.032 | 0.599 | 0.850 | 0.638 | 1.132  | 0.265 | 0.977 | Imputed   |
| rs181533994 | 10:18453604_C/T       | 0.009 | 1.000 | 0.726 | 0.414 | 1.275  | 0.266 | 0.928 | Imputed   |
| 10:18918187 | 10:18918187_T/G       | 0.005 | 1.000 | 0.660 | 0.317 | 1.372  | 0.266 | 0.912 | Imputed   |
| rs11014171  | 10:18711195_C/T       | 0.305 | 0.053 | 0.941 | 0.846 | 1.047  | 0.266 | 1.000 | Genotyped |
| rs111803083 | 10:18908224_C/T       | 0.005 | 1.000 | 0.660 | 0.317 | 1.373  | 0.266 | 0.911 | Imputed   |
| rs11012659  | 10:18383929_G/A       | 0.133 | 0.150 | 1.101 | 0.929 | 1.304  | 0.266 | 0.761 | Imputed   |
| rs111313358 | 10:18698224_T/G       | 0.031 | 0.600 | 0.850 | 0.639 | 1.132  | 0.267 | 0.993 | Imputed   |
| rs148748523 | 10:18776991_G/C       | 0.148 | 0.256 | 1.085 | 0.939 | 1.255  | 0.268 | 0.961 | Imputed   |
| rs57194834  | 10:18383857_TG/T      | 0.133 | 0.110 | 1.100 | 0.929 | 1.304  | 0.268 | 0.761 | Imputed   |
| rs112133583 | 10:18695681_C/T       | 0.024 | 0.538 | 0.798 | 0.535 | 1.190  | 0.268 | 0.679 | Imputed   |
| rs35255141  | 10:18782777_G/T       | 0.148 | 0.252 | 1.086 | 0.938 | 1.256  | 0.269 | 0.957 | Imputed   |
| rs7079408   | 10:18377343_A/G       | 0.266 | 0.021 | 1.065 | 0.953 | 1.189  | 0.269 | 0.999 | Genotyped |
| rs146910110 | 10:18410537_T/TTGTG   | 0.539 | 0.042 | 0.945 | 0.853 | 1.045  | 0.270 | 0.956 | Imputed   |
| rs7083207   | 10:18376980_T/C       | 0.266 | 0.021 | 1.065 | 0.953 | 1.190  | 0.270 | 0.997 | Imputed   |
| rs111399237 | 10:18747874_T/C       | 0.072 | 0.548 | 0.896 | 0.737 | 1.089  | 0.271 | 0.970 | Imputed   |
| rs1757216   | 10:18506426_G/A       | 0.788 | 0.091 | 1.073 | 0.947 | 1.216  | 0.271 | 0.946 | Imputed   |
| 10:18454404 | 10:18454404_C/T       | 0.001 | 1.000 | 0.412 | 0.085 | 2.000  | 0.271 | 0.684 | Imputed   |
| rs117926523 | 10:18336903_A/G       | 0.006 | 0.072 | 1.514 | 0.722 | 3.173  | 0.272 | 0.682 | Imputed   |
| rs73595533  | 10:18499045_C/A       | 0.084 | 0.588 | 0.899 | 0.743 | 1.087  | 0.272 | 0.909 | Imputed   |
| rs4606373   | 10:18897422_A/T       | 0.505 | 0.206 | 1.060 | 0.955 | 1.175  | 0.272 | 0.940 | Imputed   |
| rs35195204  | 10:18715884_A/ATTTTTT | 0.780 | 0.745 | 0.932 | 0.822 | 1.057  | 0.273 | 0.940 | Imputed   |
| rs79576525  | 10:18699979_A/G       | 0.032 | 0.600 | 0.852 | 0.640 | 1.135  | 0.273 | 0.980 | Imputed   |
| rs75613380  | 10:18488383_G/A       | 0.092 | 0.754 | 0.900 | 0.746 | 1.087  | 0.274 | 0.861 | Imputed   |
| rs12355645  | 10:18743994_G/A       | 0.369 | 0.162 | 0.943 | 0.849 | 1.048  | 0.274 | 0.960 | Imputed   |
| rs2497816   | 10:18365424_G/A       | 0.190 | 0.134 | 0.928 | 0.813 | 1.061  | 0.275 | 0.909 | Imputed   |
| rs192571704 | 10:18341899_T/C       | 0.001 | 1.000 | 2.275 | 0.520 | 9.948  | 0.275 | 0.819 | Imputed   |
| rs2488148   | 10:18344187_G/A       | 0.330 | 0.694 | 0.942 | 0.847 | 1.048  | 0.275 | 0.979 | Imputed   |
| rs10828803  | 10:18794073_C/T       | 0.283 | 0.025 | 0.937 | 0.835 | 1.053  | 0.275 | 0.913 | Imputed   |
| rs112291768 | 10:18893816_T/C       | 0.271 | 0.048 | 0.937 | 0.833 | 1.053  | 0.275 | 0.919 | Imputed   |
| rs1575835   | 10:18714742_A/G       | 0.305 | 0.037 | 0.942 | 0.847 | 1.049  | 0.275 | 0.991 | Imputed   |
| rs1813353   | 10:18707448_T/C       | 0.304 | 0.041 | 0.942 | 0.847 | 1.049  | 0.276 | 0.993 | Imputed   |
| rs143179505 | 10:18370961_C/G       | 0.015 | 1.000 | 1.283 | 0.820 | 2.009  | 0.276 | 0.808 | Imputed   |
| rs34267419  | 10:18379471_TG/T      | 0.098 | 0.027 | 0.901 | 0.748 | 1.087  | 0.276 | 0.806 | Imputed   |
| rs35363073  | 10:18471448_TAA/T     | 0.231 | 0.180 | 0.935 | 0.827 | 1.056  | 0.276 | 0.967 | Imputed   |
| rs4748493   | 10:18898701_T/A       | 0.505 | 0.195 | 1.059 | 0.955 | 1.175  | 0.277 | 0.940 | Imputed   |
| rs4748494   | 10:18898960_A/G       | 0.505 | 0.195 | 1.059 | 0.955 | 1.175  | 0.277 | 0.940 | Imputed   |
| rs147793742 | 10:18696077_G/A       | 0.031 | 0.600 | 0.853 | 0.641 | 1.136  | 0.277 | 0.991 | Imputed   |
| rs61839209  | 10:18645086_T/C       | 0.257 | 0.256 | 0.938 | 0.835 | 1.053  | 0.277 | 0.965 | Imputed   |
| rs11815316  | 10:18701691_T/C       | 0.032 | 0.599 | 0.853 | 0.641 | 1.136  | 0.278 | 0.961 | Imputed   |
| rs74117987  | 10:18698752_C/T       | 0.032 | 0.600 | 0.853 | 0.641 | 1.136  | 0.278 | 0.969 | Imputed   |
| 10:18844615 | 10:18844615_T/C       | 0.009 | 1.000 | 1.432 | 0.749 | 2.738  | 0.278 | 0.635 | Imputed   |
| rs11812630  | 10:18701836_G/A       | 0.032 | 0.599 | 0.854 | 0.641 | 1.137  | 0.279 | 0.961 | Imputed   |

SUPPLEMENTARY DATA

|             |                                    |       |       |       |       |        |       |       |           |
|-------------|------------------------------------|-------|-------|-------|-------|--------|-------|-------|-----------|
| rs11595529  | 10:18759047_G/A                    | 0.125 | 0.276 | 1.088 | 0.934 | 1.268  | 0.279 | 0.989 | Imputed   |
| rs368351076 | 10:18541174_G/A                    | 0.001 | 1.000 | 2.639 | 0.455 | 15.323 | 0.279 | 0.655 | Imputed   |
| rs12772024  | 10:18701811_A/T                    | 0.032 | 0.599 | 0.854 | 0.641 | 1.137  | 0.280 | 0.961 | Imputed   |
| rs57285503  | 10:18701167_C/G                    | 0.032 | 0.599 | 0.854 | 0.642 | 1.137  | 0.281 | 0.958 | Imputed   |
| rs79947700  | 10:18422400_T/G                    | 0.110 | 0.521 | 1.092 | 0.931 | 1.280  | 0.281 | 0.982 | Imputed   |
| rs145266380 | 10:18721971_A/T                    | 0.034 | 0.797 | 0.855 | 0.643 | 1.137  | 0.282 | 0.924 | Imputed   |
| rs67885731  | 10:18347490_T/C                    | 0.420 | 0.112 | 1.057 | 0.956 | 1.168  | 0.282 | 0.990 | Imputed   |
| 10:18791401 | 10:18791401_C/T                    | 0.008 | 1.000 | 0.726 | 0.405 | 1.301  | 0.282 | 0.890 | Imputed   |
| rs74117989  | 10:18700750_A/T                    | 0.032 | 0.600 | 0.855 | 0.642 | 1.138  | 0.283 | 0.959 | Imputed   |
| rs11012579  | 10:18371145_T/C                    | 0.054 | 1.000 | 0.876 | 0.687 | 1.116  | 0.284 | 0.828 | Imputed   |
| 10:18515281 | 10:18515281_G/A                    | 0.002 | 1.000 | 2.241 | 0.512 | 9.801  | 0.284 | 0.713 | Imputed   |
| rs993865    | 10:18540104_G/A                    | 0.815 | 0.171 | 1.073 | 0.943 | 1.219  | 0.284 | 0.988 | Imputed   |
| rs10828259  | 10:18415779_A/T                    | 0.170 | 0.736 | 0.929 | 0.812 | 1.063  | 0.284 | 0.982 | Imputed   |
| rs76373827  | 10:18589971_T/C                    | 0.026 | 0.396 | 0.820 | 0.571 | 1.179  | 0.284 | 0.745 | Imputed   |
| rs147688914 | 10:18678946_G/A                    | 0.001 | 1.000 | 2.487 | 0.469 | 13.188 | 0.285 | 0.708 | Imputed   |
| rs11013259  | 10:18554058_A/T                    | 0.097 | 0.004 | 1.114 | 0.914 | 1.358  | 0.285 | 0.719 | Imputed   |
| rs77018321  | 10:18693057_T/A                    | 0.032 | 0.600 | 0.855 | 0.641 | 1.140  | 0.285 | 0.980 | Imputed   |
| rs75159173  | 10:18693019_C/G                    | 0.032 | 0.600 | 0.855 | 0.641 | 1.140  | 0.285 | 0.979 | Imputed   |
| rs183385150 | 10:18457994_C/A                    | 0.020 | 0.370 | 1.229 | 0.842 | 1.795  | 0.285 | 0.868 | Imputed   |
| rs10828260  | 10:18415841_C/A                    | 0.170 | 0.736 | 0.929 | 0.813 | 1.063  | 0.286 | 0.982 | Imputed   |
| rs11012762  | 10:18415759_C/G                    | 0.170 | 0.736 | 0.929 | 0.813 | 1.063  | 0.286 | 0.983 | Imputed   |
| rs75679864  | 10:18700719_G/C                    | 0.032 | 0.600 | 0.856 | 0.643 | 1.139  | 0.286 | 0.963 | Imputed   |
| rs184657432 | 10:18470977_G/A                    | 0.004 | 1.000 | 1.699 | 0.642 | 4.501  | 0.286 | 0.707 | Imputed   |
| rs183835488 | 10:18700174_C/A                    | 0.032 | 0.600 | 0.856 | 0.643 | 1.139  | 0.286 | 0.960 | Imputed   |
| rs16917288  | 10:18700078_T/C                    | 0.032 | 0.600 | 0.856 | 0.643 | 1.139  | 0.286 | 0.960 | Imputed   |
| rs113085015 | 10:18700191_T/C                    | 0.033 | 0.600 | 0.856 | 0.643 | 1.139  | 0.286 | 0.960 | Imputed   |
| rs2488158   | 10:18370324_G/A                    | 0.200 | 0.110 | 0.931 | 0.817 | 1.062  | 0.286 | 0.900 | Imputed   |
| rs11012573  | 10:18370496_T/G                    | 0.055 | 0.862 | 0.877 | 0.688 | 1.117  | 0.287 | 0.824 | Imputed   |
| rs10764318  | 10:18415963_G/A                    | 0.170 | 0.736 | 0.930 | 0.813 | 1.063  | 0.287 | 0.981 | Imputed   |
| rs12414844  | 10:18451994_C/T                    | 0.345 | 0.263 | 0.945 | 0.851 | 1.049  | 0.287 | 0.997 | Imputed   |
| rs1014296   | 10:18437695_G/T                    | 0.158 | 0.065 | 1.077 | 0.940 | 1.234  | 0.287 | 0.981 | Imputed   |
| rs1986480   | 10:18346094_C/T                    | 0.419 | 0.112 | 1.056 | 0.955 | 1.167  | 0.287 | 1.000 | Genotyped |
| rs7893853   | 10:18776260_A/T                    | 0.150 | 0.152 | 1.082 | 0.936 | 1.249  | 0.287 | 0.961 | Imputed   |
| rs61705369  | 10:18699430_G/GTTTT                | 0.032 | 0.600 | 0.856 | 0.644 | 1.139  | 0.287 | 0.961 | Imputed   |
| rs187658915 | 10:18700175_G/GT                   | 0.032 | 0.600 | 0.856 | 0.643 | 1.140  | 0.288 | 0.962 | Imputed   |
| rs111358714 | 10:18699866_G/A                    | 0.032 | 0.600 | 0.856 | 0.644 | 1.140  | 0.288 | 0.960 | Imputed   |
| rs61368411  | 10:18699410_G/A                    | 0.032 | 0.600 | 0.857 | 0.644 | 1.140  | 0.288 | 0.962 | Imputed   |
| rs74117988  | 10:18699991_T/G                    | 0.033 | 0.600 | 0.857 | 0.644 | 1.140  | 0.288 | 0.960 | Imputed   |
| rs145109067 | 10:18699706_T/C                    | 0.032 | 0.600 | 0.857 | 0.644 | 1.140  | 0.289 | 0.961 | Imputed   |
| rs12767311  | 10:18759574_A/T                    | 0.126 | 0.223 | 1.086 | 0.933 | 1.264  | 0.289 | 0.995 | Imputed   |
| rs11012763  | 10:18415902_A/G                    | 0.169 | 0.736 | 0.930 | 0.813 | 1.064  | 0.289 | 0.985 | Imputed   |
| rs11012761  | 10:18415552_C/A                    | 0.169 | 0.735 | 0.930 | 0.813 | 1.064  | 0.289 | 0.988 | Imputed   |
| rs368248510 | 10:18539462_CT/C                   | 0.220 | 0.000 | 0.933 | 0.821 | 1.061  | 0.290 | 0.853 | Imputed   |
| rs11013147  | 10:18534283_C/T                    | 0.017 | 0.197 | 0.799 | 0.527 | 1.211  | 0.290 | 0.860 | Imputed   |
| rs59779524  | 10:18699259_A/G                    | 0.033 | 0.600 | 0.858 | 0.645 | 1.141  | 0.292 | 0.962 | Imputed   |
| rs58065366  | 10:18595314_G/A                    | 0.083 | 0.719 | 0.898 | 0.734 | 1.098  | 0.293 | 0.821 | Imputed   |
| rs60897944  | 10:18624713_AACAC/A                | 0.818 | 0.187 | 0.928 | 0.806 | 1.067  | 0.294 | 0.864 | Imputed   |
| rs148029514 | 10:18370520_A/T                    | 0.002 | 1.000 | 0.505 | 0.141 | 1.810  | 0.294 | 0.621 | Imputed   |
| rs55988124  | 10:18698996_T/C                    | 0.032 | 0.600 | 0.858 | 0.645 | 1.142  | 0.294 | 0.966 | Imputed   |
| rs59167174  | 10:18699023_A/T                    | 0.032 | 0.600 | 0.858 | 0.645 | 1.142  | 0.294 | 0.966 | Imputed   |
| rs7909027   | 10:18695892_T/C                    | 0.303 | 0.628 | 1.060 | 0.951 | 1.180  | 0.294 | 1.000 | Genotyped |
| 10:18428024 | 10:18428024_GCCGGCTGTGGTGCCGTGCA/G | 0.002 | 1.000 | 2.049 | 0.536 | 7.832  | 0.294 | 0.651 | Imputed   |
| rs112483873 | 10:18685014_T/C                    | 0.032 | 0.793 | 0.856 | 0.640 | 1.145  | 0.295 | 0.961 | Imputed   |
| rs2357929   | 10:18643581_G/A                    | 0.137 | 0.593 | 0.924 | 0.796 | 1.072  | 0.295 | 0.951 | Imputed   |
| rs111483964 | 10:18706851_G/GA                   | 0.305 | 0.045 | 0.945 | 0.849 | 1.051  | 0.295 | 0.992 | Imputed   |
| rs111643893 | 10:18778373_C/CT                   | 0.433 | 0.000 | 0.944 | 0.848 | 1.051  | 0.295 | 0.876 | Imputed   |
| rs7905106   | 10:18695894_A/G                    | 0.303 | 0.628 | 1.059 | 0.951 | 1.180  | 0.296 | 0.999 | Imputed   |
| rs141884699 | 10:18360640_G/A                    | 0.014 | 1.000 | 1.291 | 0.800 | 2.083  | 0.296 | 0.781 | Imputed   |
| rs11013134  | 10:18530799_G/A                    | 0.017 | 0.213 | 0.802 | 0.530 | 1.213  | 0.296 | 0.871 | Imputed   |
| rs12777225  | 10:18757239_A/T                    | 0.139 | 0.594 | 1.082 | 0.934 | 1.253  | 0.296 | 0.976 | Imputed   |
| rs71402186  | 10:18890450_T/TCTCTAGTGAGGAAACCA   | 0.481 | 0.027 | 1.059 | 0.951 | 1.179  | 0.297 | 0.880 | Imputed   |
| rs72780087  | 10:18383480_A/G                    | 0.047 | 0.574 | 0.878 | 0.687 | 1.121  | 0.297 | 0.826 | Imputed   |
| rs148667793 | 10:18570507_G/A                    | 0.008 | 1.000 | 0.723 | 0.392 | 1.333  | 0.298 | 0.868 | Imputed   |
| rs1757200   | 10:18529835_T/A                    | 0.016 | 0.213 | 0.803 | 0.531 | 1.215  | 0.299 | 0.878 | Imputed   |
| rs1757219   | 10:18510079_T/C                    | 0.715 | 0.415 | 1.061 | 0.949 | 1.185  | 0.299 | 0.983 | Imputed   |
| rs12247548  | 10:18925750_G/C                    | 0.003 | 1.000 | 1.905 | 0.565 | 6.423  | 0.299 | 0.643 | Imputed   |
| rs61839302  | 10:18790704_G/A                    | 0.144 | 0.001 | 0.924 | 0.796 | 1.073  | 0.299 | 0.890 | Imputed   |
| 10:18347155 | 10:18347155_C/CT                   | 0.415 | 0.040 | 1.055 | 0.954 | 1.167  | 0.299 | 0.985 | Imputed   |
| rs79142133  | 10:18530043_T/C                    | 0.017 | 0.213 | 0.803 | 0.531 | 1.215  | 0.299 | 0.877 | Imputed   |
| rs16917080  | 10:18525400_T/G                    | 0.016 | 0.218 | 0.804 | 0.532 | 1.214  | 0.299 | 0.911 | Imputed   |
| rs4514309   | 10:18796611_T/A                    | 0.015 | 0.014 | 1.278 | 0.803 | 2.034  | 0.300 | 0.744 | Imputed   |
| rs141722610 | 10:18442145_GGT/G                  | 0.126 | 0.390 | 1.083 | 0.931 | 1.259  | 0.301 | 0.980 | Imputed   |
| rs200726399 | 10:18442149_AATAT/A                | 0.126 | 0.390 | 1.083 | 0.931 | 1.259  | 0.301 | 0.980 | Imputed   |
| 10:18621228 | 10:18621228_G/A                    | 0.003 | 1.000 | 0.554 | 0.181 | 1.697  | 0.301 | 0.786 | Imputed   |
| rs55794889  | 10:18627600_C/T                    | 0.412 | 0.123 | 0.947 | 0.853 | 1.051  | 0.301 | 0.940 | Imputed   |
| rs56267503  | 10:18627596_T/C                    | 0.412 | 0.123 | 0.947 | 0.853 | 1.051  | 0.301 | 0.940 | Imputed   |
| rs148651095 | 10:18627606_CCT/C                  | 0.412 | 0.123 | 0.947 | 0.853 | 1.051  | 0.302 | 0.940 | Imputed   |
| rs10828272  | 10:18441848_G/A                    | 0.126 | 0.390 | 1.083 | 0.931 | 1.258  | 0.302 | 0.979 | Imputed   |
| rs7090926   | 10:18900475_C/T                    | 0.504 | 0.184 | 1.056 | 0.952 | 1.171  | 0.303 | 0.939 | Imputed   |
| rs75271299  | 10:18525797_G/A                    | 0.024 | 0.276 | 0.838 | 0.598 | 1.173  | 0.303 | 0.932 | Imputed   |
| 10:18616799 | 10:18616799_G/T                    | 0.003 | 1.000 | 1.777 | 0.596 | 5.301  | 0.303 | 0.695 | Imputed   |
| rs16917194  | 10:18645447_T/C                    | 0.256 | 0.239 | 0.941 | 0.838 | 1.056  | 0.303 | 0.970 | Imputed   |
| rs73591764  | 10:18391034_A/G                    | 0.059 | 0.863 | 0.883 | 0.697 | 1.119  | 0.303 | 0.794 | Imputed   |
| rs16917257  | 10:18683293_G/A                    | 0.032 | 0.793 | 0.858 | 0.642 | 1.148  | 0.303 | 0.943 | Imputed   |
| rs61839303  | 10:18790906_T/G                    | 0.146 | 0.001 | 0.925 | 0.798 | 1.073  | 0.304 | 0.898 | Imputed   |
| rs7916255   | 10:18385545_A/G                    | 0.048 | 0.717 | 0.881 | 0.691 | 1.122  | 0.304 | 0.919 | Imputed   |
| rs201463332 | 10:18559837_T/TAA                  | 0.040 | 0.415 | 1.150 | 0.881 | 1.500  | 0.304 | 0.942 | Imputed   |
| rs150578145 | 10:18343313_C/T                    | 0.016 | 1.000 | 0.808 | 0.537 | 1.214  | 0.304 | 0.932 | Imputed   |
| rs10828282  | 10:18450295_C/T                    | 0.346 | 0.311 | 0.947 | 0.853 | 1.051  | 0.305 | 0.999 | Imputed   |
| rs150226657 | 10:18893032_A/G                    | 0.009 | 1.000 | 1.415 | 0.729 | 2.744  | 0.305 | 0.629 | Imputed   |
| rs10828281  | 10:18449442_A/G                    | 0.346 | 0.311 | 0.947 | 0.853 | 1.051  | 0.305 | 0.999 | Imputed   |

## SUPPLEMENTARY DATA

|             |                     |       |       |       |       |       |       |       |           |
|-------------|---------------------|-------|-------|-------|-------|-------|-------|-------|-----------|
| rs10828279  | 10:18449203_C/T     | 0.346 | 0.311 | 0.947 | 0.853 | 1.051 | 0.305 | 0.999 | Imputed   |
| rs61566389  | 10:18589535_A/G     | 0.048 | 0.558 | 1.139 | 0.888 | 1.463 | 0.305 | 0.892 | Imputed   |
| rs12354884  | 10:18521702_A/C     | 0.016 | 0.218 | 0.807 | 0.535 | 1.216 | 0.306 | 0.940 | Imputed   |
| rs4129877   | 10:18768178_G/A     | 0.660 | 0.526 | 1.057 | 0.951 | 1.175 | 0.306 | 0.975 | Imputed   |
| rs189907573 | 10:18559835_C/T     | 0.040 | 0.416 | 1.148 | 0.881 | 1.497 | 0.306 | 0.943 | Imputed   |
| rs12357580  | 10:18450062_C/T     | 0.345 | 0.311 | 0.947 | 0.853 | 1.051 | 0.306 | 1.000 | Imputed   |
| rs7099307   | 10:18901770_C/T     | 0.504 | 0.195 | 1.056 | 0.952 | 1.171 | 0.306 | 0.939 | Imputed   |
| rs112797625 | 10:18697960_AT/A    | 0.033 | 0.600 | 0.862 | 0.648 | 1.146 | 0.307 | 0.965 | Imputed   |
| rs59292090  | 10:18449103_T/TG    | 0.346 | 0.311 | 0.947 | 0.853 | 1.051 | 0.307 | 0.997 | Imputed   |
| rs139972464 | 10:18516318_GCAGT/G | 0.018 | 1.000 | 1.265 | 0.805 | 1.988 | 0.307 | 0.673 | Imputed   |
| rs138703295 | 10:18842421_T/C     | 0.052 | 0.293 | 0.881 | 0.691 | 1.123 | 0.307 | 0.862 | Imputed   |
| rs72780048  | 10:18340409_G/A     | 0.414 | 0.034 | 1.054 | 0.953 | 1.166 | 0.307 | 0.982 | Imputed   |
| rs141358802 | 10:18842420_A/G     | 0.052 | 0.293 | 0.881 | 0.691 | 1.123 | 0.307 | 0.862 | Imputed   |
| 10:18842428 | 10:18842428_T/A     | 0.052 | 0.293 | 0.881 | 0.691 | 1.123 | 0.307 | 0.862 | Imputed   |
| rs77973393  | 10:18411776_C/T     | 0.171 | 0.613 | 0.933 | 0.816 | 1.066 | 0.308 | 0.992 | Imputed   |
| rs149358230 | 10:18518624_T/T/A   | 0.015 | 0.218 | 0.808 | 0.537 | 1.217 | 0.308 | 0.951 | Imputed   |
| rs56346888  | 10:18624077_G/A     | 0.117 | 0.217 | 0.920 | 0.784 | 1.080 | 0.308 | 0.928 | Imputed   |
| rs17680760  | 10:18518619_T/C     | 0.015 | 0.218 | 0.808 | 0.537 | 1.217 | 0.308 | 0.951 | Imputed   |
| rs80170691  | 10:18500756_C/T     | 0.007 | 1.000 | 0.709 | 0.366 | 1.374 | 0.308 | 0.835 | Imputed   |
| 10:18652771 | 10:18652771_T/A     | 0.003 | 1.000 | 1.655 | 0.628 | 4.364 | 0.309 | 0.840 | Imputed   |
| rs11013089  | 10:18518195_A/G     | 0.015 | 0.218 | 0.809 | 0.537 | 1.217 | 0.309 | 0.951 | Imputed   |
| rs77572542  | 10:18698109_G/T     | 0.032 | 0.600 | 0.863 | 0.649 | 1.147 | 0.309 | 0.968 | Imputed   |
| rs67744136  | 10:18705336_T/C     | 0.306 | 0.049 | 0.946 | 0.850 | 1.053 | 0.309 | 0.991 | Imputed   |
| rs72784216  | 10:18546645_C/T     | 0.192 | 0.153 | 0.935 | 0.822 | 1.064 | 0.310 | 0.952 | Imputed   |
| rs116898814 | 10:18517216_G/A     | 0.015 | 0.218 | 0.809 | 0.538 | 1.218 | 0.310 | 0.953 | Imputed   |
| rs11013081  | 10:18516295_G/A     | 0.015 | 0.218 | 0.809 | 0.538 | 1.217 | 0.310 | 0.955 | Imputed   |
| rs11012812  | 10:18438555_A/G     | 0.126 | 0.353 | 1.081 | 0.930 | 1.257 | 0.310 | 0.975 | Imputed   |
| rs11013076  | 10:18515301_A/C     | 0.015 | 0.218 | 0.809 | 0.538 | 1.218 | 0.310 | 0.955 | Imputed   |
| rs11013073  | 10:18514826_T/G     | 0.015 | 0.218 | 0.810 | 0.538 | 1.218 | 0.310 | 0.956 | Imputed   |
| rs141323473 | 10:18333234_G/A     | 0.016 | 1.000 | 0.809 | 0.537 | 1.219 | 0.310 | 0.924 | Imputed   |
| rs186387333 | 10:18879041_G/C     | 0.016 | 0.532 | 0.799 | 0.517 | 1.233 | 0.310 | 0.809 | Imputed   |
| rs10828326  | 10:18515862_G/C     | 0.015 | 0.218 | 0.810 | 0.538 | 1.218 | 0.311 | 0.955 | Imputed   |
| rs112704512 | 10:18490204_CT/C    | 0.227 | 0.000 | 1.071 | 0.938 | 1.225 | 0.311 | 0.805 | Imputed   |
| rs11014036  | 10:18684926_C/A     | 0.033 | 0.793 | 0.861 | 0.644 | 1.150 | 0.311 | 0.941 | Imputed   |
| rs80115014  | 10:18341629_G/A     | 0.131 | 0.442 | 0.924 | 0.794 | 1.076 | 0.311 | 0.944 | Imputed   |
| rs2068357   | 10:18449089_G/T     | 0.346 | 0.311 | 0.948 | 0.854 | 1.052 | 0.311 | 0.996 | Imputed   |
| rs76056321  | 10:18511102_A/G     | 0.015 | 0.218 | 0.810 | 0.539 | 1.218 | 0.311 | 0.959 | Imputed   |
| rs12359455  | 10:18513191_A/G     | 0.015 | 0.218 | 0.810 | 0.539 | 1.218 | 0.312 | 0.958 | Imputed   |
| 10:18874346 | 10:18874346_CG/C    | 0.004 | 1.000 | 0.653 | 0.286 | 1.491 | 0.312 | 0.887 | Imputed   |
| rs7073796   | 10:18771736_A/G     | 0.681 | 0.444 | 1.058 | 0.949 | 1.179 | 0.312 | 0.959 | Imputed   |
| rs11013119  | 10:18526850_T/G     | 0.016 | 0.213 | 0.809 | 0.535 | 1.221 | 0.313 | 0.891 | Imputed   |
| rs77166420  | 10:18344703_G/C     | 0.132 | 0.402 | 0.925 | 0.794 | 1.077 | 0.314 | 0.935 | Imputed   |
| rs76771594  | 10:18344709_A/G     | 0.132 | 0.402 | 0.925 | 0.794 | 1.077 | 0.314 | 0.935 | Imputed   |
| rs7916599   | 10:18384452_G/A     | 0.047 | 0.578 | 0.882 | 0.690 | 1.126 | 0.314 | 0.923 | Imputed   |
| rs71402187  | 10:18895267_T/T/C   | 0.508 | 0.312 | 1.055 | 0.951 | 1.170 | 0.314 | 0.940 | Imputed   |
| rs183033974 | 10:18642481_C/T     | 0.025 | 0.522 | 0.832 | 0.582 | 1.190 | 0.314 | 0.820 | Imputed   |
| rs56177813  | 10:18623696_G/A     | 0.116 | 0.217 | 0.921 | 0.785 | 1.081 | 0.315 | 0.931 | Imputed   |
| rs71497248  | 10:18763386_C/T     | 0.125 | 0.220 | 1.081 | 0.928 | 1.260 | 0.315 | 0.993 | Imputed   |
| rs71497246  | 10:18763194_C/T     | 0.125 | 0.220 | 1.081 | 0.928 | 1.259 | 0.315 | 0.993 | Imputed   |
| rs75413292  | 10:18794249_G/A     | 0.015 | 0.014 | 1.268 | 0.798 | 2.017 | 0.315 | 0.746 | Imputed   |
| rs61839304  | 10:18791390_C/T     | 0.146 | 0.002 | 0.927 | 0.799 | 1.075 | 0.315 | 0.899 | Imputed   |
| rs12416205  | 10:18892407_C/T     | 0.508 | 0.343 | 1.055 | 0.951 | 1.170 | 0.315 | 0.940 | Imputed   |
| rs1409202   | 10:18763683_C/A     | 0.125 | 0.311 | 1.081 | 0.928 | 1.259 | 0.316 | 0.993 | Imputed   |
| rs117539117 | 10:18846543_C/T     | 0.052 | 0.740 | 1.129 | 0.891 | 1.430 | 0.316 | 0.893 | Imputed   |
| rs1409203   | 10:18763706_C/T     | 0.125 | 0.311 | 1.081 | 0.928 | 1.259 | 0.316 | 0.992 | Imputed   |
| rs190636631 | 10:18854399_T/G     | 0.025 | 0.741 | 1.180 | 0.854 | 1.630 | 0.316 | 0.967 | Imputed   |
| rs61839206  | 10:18620113_C/T     | 0.234 | 0.006 | 0.941 | 0.834 | 1.060 | 0.316 | 0.950 | Imputed   |
| rs4545438   | 10:18769203_G/T     | 0.658 | 0.482 | 1.056 | 0.949 | 1.174 | 0.316 | 0.971 | Imputed   |
| rs36043776  | 10:18765504_G/A     | 0.125 | 0.280 | 1.081 | 0.928 | 1.260 | 0.316 | 0.987 | Imputed   |
| rs11014156  | 10:18706480_T/G     | 0.206 | 0.922 | 0.937 | 0.825 | 1.064 | 0.316 | 0.954 | Imputed   |
| rs12411654  | 10:18892555_T/C     | 0.508 | 0.343 | 1.055 | 0.951 | 1.170 | 0.316 | 0.940 | Imputed   |
| rs11015099  | 10:18893611_A/G     | 0.508 | 0.343 | 1.055 | 0.951 | 1.170 | 0.316 | 0.940 | Imputed   |
| rs12258178  | 10:18685781_A/C     | 0.033 | 0.793 | 0.862 | 0.646 | 1.152 | 0.317 | 0.944 | Imputed   |
| rs111553025 | 10:18624884_A/G     | 0.116 | 0.189 | 0.921 | 0.785 | 1.082 | 0.317 | 0.931 | Imputed   |
| rs77354702  | 10:18793463_A/G     | 0.015 | 0.014 | 1.267 | 0.797 | 2.014 | 0.317 | 0.744 | Imputed   |
| rs7073004   | 10:18902316_A/G     | 0.134 | 0.825 | 0.923 | 0.789 | 1.080 | 0.318 | 0.883 | Imputed   |
| rs60659831  | 10:18423878_C/T     | 0.339 | 0.096 | 0.948 | 0.854 | 1.053 | 0.318 | 0.990 | Imputed   |
| rs187971876 | 10:18862093_A/G     | 0.025 | 0.741 | 1.178 | 0.854 | 1.624 | 0.318 | 0.971 | Imputed   |
| rs11014359  | 10:18754671_C/G     | 0.100 | 0.460 | 1.093 | 0.918 | 1.301 | 0.318 | 0.918 | Imputed   |
| rs11014577  | 10:18800125_G/C     | 0.494 | 0.950 | 1.053 | 0.951 | 1.166 | 0.318 | 0.967 | Imputed   |
| rs112884804 | 10:18726977_C/T     | 0.052 | 0.101 | 0.874 | 0.672 | 1.138 | 0.318 | 0.738 | Imputed   |
| rs73603722  | 10:18612741_C/T     | 0.118 | 0.099 | 0.920 | 0.782 | 1.083 | 0.318 | 0.887 | Imputed   |
| rs11012974  | 10:18489049_T/C     | 0.018 | 0.306 | 0.822 | 0.559 | 1.209 | 0.319 | 0.928 | Imputed   |
| rs10764297  | 10:18351573_G/T     | 0.058 | 0.727 | 0.886 | 0.699 | 1.124 | 0.319 | 0.815 | Imputed   |
| rs10828749  | 10:18756881_G/A     | 0.359 | 0.559 | 1.054 | 0.950 | 1.169 | 0.320 | 1.000 | Genotyped |
| rs374237268 | 10:18691320_G/GAA   | 0.792 | 0.520 | 0.936 | 0.821 | 1.067 | 0.320 | 0.904 | Imputed   |
| rs1409204   | 10:18763822_C/T     | 0.125 | 0.311 | 1.081 | 0.927 | 1.259 | 0.321 | 0.991 | Imputed   |
| rs187119940 | 10:18480051_C/G     | 0.018 | 0.294 | 1.218 | 0.825 | 1.797 | 0.321 | 0.928 | Imputed   |
| rs2182345   | 10:18767561_A/G     | 0.126 | 0.223 | 1.080 | 0.927 | 1.258 | 0.321 | 0.984 | Imputed   |
| rs10508559  | 10:18505313_T/C     | 0.017 | 0.338 | 0.824 | 0.563 | 1.207 | 0.321 | 0.986 | Imputed   |
| rs77465184  | 10:18352643_T/C     | 0.033 | 0.547 | 1.167 | 0.860 | 1.584 | 0.321 | 0.835 | Imputed   |
| rs1113372   | 10:18767834_G/T     | 0.126 | 0.223 | 1.080 | 0.927 | 1.258 | 0.322 | 0.983 | Imputed   |
| rs77499339  | 10:18368104_C/T     | 0.220 | 0.039 | 0.939 | 0.829 | 1.064 | 0.322 | 0.915 | Imputed   |
| rs7902194   | 10:18542025_A/T     | 0.827 | 0.112 | 1.070 | 0.936 | 1.223 | 0.322 | 0.957 | Imputed   |
| rs142001735 | 10:18438002_A/G     | 0.004 | 1.000 | 1.584 | 0.637 | 3.941 | 0.323 | 0.781 | Imputed   |
| rs1757217   | 10:18506467_T/C     | 0.854 | 0.004 | 1.076 | 0.931 | 1.243 | 0.323 | 0.926 | Imputed   |
| rs4373814   | 10:18419972_G/C     | 0.563 | 0.023 | 0.951 | 0.861 | 1.050 | 0.323 | 0.996 | Imputed   |
| rs11592112  | 10:18770063_C/G     | 0.126 | 0.251 | 1.080 | 0.927 | 1.259 | 0.324 | 0.977 | Imputed   |
| rs11013037  | 10:18503928_T/A     | 0.017 | 0.338 | 0.826 | 0.564 | 1.208 | 0.324 | 0.989 | Imputed   |
| rs78470934  | 10:18535435_A/G     | 0.075 | 0.001 | 0.900 | 0.731 | 1.109 | 0.325 | 0.790 | Imputed   |
| rs11598027  | 10:18760635_C/T     | 0.124 | 0.277 | 1.080 | 0.927 | 1.258 | 0.325 | 1.000 | Genotyped |
| rs11013024  | 10:18500140_G/A     | 0.017 | 0.338 | 0.826 | 0.566 | 1.208 | 0.325 | 0.996 | Imputed   |

SUPPLEMENTARY DATA

|             |                           |       |       |       |       |       |       |       |           |
|-------------|---------------------------|-------|-------|-------|-------|-------|-------|-------|-----------|
| 10:18439784 | 10:18439784_CTTTTTTT/C    | 0.048 | 0.015 | 1.139 | 0.879 | 1.475 | 0.325 | 0.775 | Imputed   |
| rs78120739  | 10:18364631_C/T           | 0.221 | 0.043 | 0.939 | 0.829 | 1.064 | 0.325 | 0.914 | Imputed   |
| rs35241357  | 10:18686265_A/G           | 0.300 | 0.881 | 1.057 | 0.947 | 1.180 | 0.325 | 0.978 | Imputed   |
| rs192085228 | 10:18914768_T/A           | 0.025 | 0.739 | 1.177 | 0.851 | 1.629 | 0.325 | 0.956 | Imputed   |
| rs143586137 | 10:18795707_A/C           | 0.002 | 1.000 | 1.818 | 0.552 | 5.986 | 0.326 | 0.705 | Imputed   |
| rs61066999  | 10:18793528_A/G           | 0.146 | 0.002 | 0.929 | 0.801 | 1.076 | 0.326 | 0.904 | Imputed   |
| rs10828310  | 10:18500862_C/T           | 0.017 | 0.338 | 0.827 | 0.566 | 1.208 | 0.326 | 0.998 | Genotyped |
| rs11317567  | 10:18774843_AT/A          | 0.542 | 0.039 | 0.948 | 0.852 | 1.055 | 0.326 | 0.886 | Imputed   |
| rs80188455  | 10:18364418_G/A           | 0.221 | 0.043 | 0.939 | 0.829 | 1.064 | 0.326 | 0.913 | Imputed   |
| rs72782016  | 10:18492807_G/A           | 0.092 | 0.012 | 0.914 | 0.763 | 1.094 | 0.326 | 0.906 | Imputed   |
| rs10828358  | 10:18538332_C/T           | 0.182 | 0.000 | 1.075 | 0.931 | 1.241 | 0.326 | 0.802 | Imputed   |
| rs143967773 | 10:18761315_G/A           | 0.124 | 0.277 | 1.079 | 0.927 | 1.257 | 0.326 | 0.988 | Imputed   |
| rs10828321  | 10:18509722_C/T           | 0.016 | 0.218 | 0.815 | 0.542 | 1.226 | 0.327 | 0.955 | Imputed   |
| rs4548524   | 10:18716867_A/G           | 0.322 | 0.042 | 0.948 | 0.852 | 1.055 | 0.327 | 0.978 | Imputed   |
| rs75903178  | 10:18792197_C/A           | 0.005 | 1.000 | 1.519 | 0.659 | 3.501 | 0.327 | 0.707 | Imputed   |
| rs34372664  | 10:18761474_A/G           | 0.124 | 0.277 | 1.079 | 0.927 | 1.257 | 0.327 | 0.997 | Imputed   |
| rs12358313  | 10:18495518_G/T           | 0.018 | 0.338 | 0.826 | 0.563 | 1.211 | 0.327 | 0.956 | Imputed   |
| rs11284460  | 10:18793366_AT/A          | 0.713 | 0.000 | 1.058 | 0.945 | 1.186 | 0.328 | 0.922 | Imputed   |
| rs7912811   | 10:18379288_A/G           | 0.263 | 0.011 | 1.058 | 0.945 | 1.183 | 0.328 | 0.980 | Imputed   |
| rs10828308  | 10:18494876_C/T           | 0.018 | 0.338 | 0.826 | 0.563 | 1.211 | 0.328 | 0.953 | Imputed   |
| rs58607727  | 10:18390707_T/C           | 0.060 | 0.734 | 0.889 | 0.701 | 1.126 | 0.328 | 0.793 | Imputed   |
| rs7092620   | 10:18797684_T/C           | 0.494 | 0.850 | 1.052 | 0.950 | 1.165 | 0.328 | 0.969 | Imputed   |
| rs4237348   | 10:18798203_T/C           | 0.494 | 0.874 | 1.052 | 0.950 | 1.165 | 0.328 | 0.970 | Imputed   |
| rs4335438   | 10:18796825_T/C           | 0.494 | 0.825 | 1.052 | 0.950 | 1.165 | 0.329 | 0.965 | Imputed   |
| rs10828244  | 10:18396166_G/A           | 0.046 | 0.718 | 0.888 | 0.700 | 1.127 | 0.329 | 0.999 | Genotyped |
| rs139981155 | 10:18417804_C/T           | 0.169 | 0.532 | 0.935 | 0.817 | 1.070 | 0.329 | 0.984 | Imputed   |
| rs12766343  | 10:18763872_C/T           | 0.124 | 0.277 | 1.079 | 0.926 | 1.257 | 0.330 | 0.995 | Imputed   |
| rs72787908  | 10:18752642_G/C           | 0.011 | 0.295 | 1.322 | 0.753 | 2.322 | 0.330 | 0.735 | Imputed   |
| rs117945867 | 10:18798835_C/T           | 0.007 | 0.102 | 0.712 | 0.359 | 1.412 | 0.331 | 0.762 | Imputed   |
| rs7901640   | 10:18656953_G/A           | 0.404 | 0.325 | 1.052 | 0.950 | 1.164 | 0.331 | 0.990 | Imputed   |
| rs147514449 | 10:18385451_A/T           | 0.046 | 0.717 | 0.887 | 0.696 | 1.130 | 0.331 | 0.954 | Imputed   |
| rs71497249  | 10:18765372_G/C           | 0.124 | 0.277 | 1.079 | 0.926 | 1.257 | 0.331 | 0.991 | Imputed   |
| rs71497250  | 10:18765437_G/A           | 0.124 | 0.277 | 1.079 | 0.926 | 1.257 | 0.331 | 0.991 | Imputed   |
| rs113506213 | 10:18765810_G/A           | 0.110 | 0.059 | 0.918 | 0.771 | 1.092 | 0.332 | 0.866 | Imputed   |
| rs11599318  | 10:18766168_A/T           | 0.124 | 0.277 | 1.079 | 0.926 | 1.257 | 0.333 | 0.988 | Imputed   |
| rs61839305  | 10:18792292_A/G           | 0.147 | 0.001 | 0.930 | 0.803 | 1.077 | 0.333 | 0.899 | Imputed   |
| rs12219393  | 10:18755609_A/G           | 0.104 | 0.164 | 1.089 | 0.916 | 1.296 | 0.333 | 0.895 | Imputed   |
| rs3905378   | 10:18767901_G/A           | 0.124 | 0.277 | 1.079 | 0.925 | 1.257 | 0.334 | 0.982 | Imputed   |
| rs7897594   | 10:18418180_A/G           | 0.387 | 0.003 | 0.950 | 0.855 | 1.054 | 0.334 | 0.938 | Imputed   |
| rs2488132   | 10:18329818_C/T           | 0.590 | 0.000 | 1.051 | 0.950 | 1.163 | 0.334 | 0.961 | Imputed   |
| 10:18853999 | 10:18853999_C/G           | 0.002 | 1.000 | 1.788 | 0.550 | 5.815 | 0.334 | 0.724 | Imputed   |
| rs137956556 | 10:18853986_G/T           | 0.002 | 1.000 | 1.788 | 0.550 | 5.814 | 0.334 | 0.724 | Imputed   |
| rs12355606  | 10:18497821_T/C           | 0.018 | 0.338 | 0.829 | 0.566 | 1.213 | 0.334 | 0.968 | Imputed   |
| rs11013860  | 10:18654027_A/C           | 0.145 | 0.267 | 0.931 | 0.804 | 1.077 | 0.335 | 0.948 | Imputed   |
| rs7894668   | 10:18770298_T/C           | 0.678 | 0.447 | 1.055 | 0.947 | 1.175 | 0.335 | 0.967 | Imputed   |
| rs189275256 | 10:18475270_C/T           | 0.004 | 1.000 | 1.580 | 0.623 | 4.007 | 0.336 | 0.765 | Imputed   |
| rs140277336 | 10:18474165_A/G           | 0.004 | 1.000 | 1.578 | 0.623 | 3.997 | 0.336 | 0.767 | Imputed   |
| rs72775117  | 10:18922748_T/C           | 0.013 | 0.079 | 1.259 | 0.786 | 2.017 | 0.337 | 0.838 | Imputed   |
| rs34849615  | 10:18414460_A/T           | 0.183 | 0.423 | 0.938 | 0.824 | 1.069 | 0.338 | 0.984 | Imputed   |
| rs11012693  | 10:18392885_C/T           | 0.046 | 0.717 | 0.889 | 0.700 | 1.130 | 0.338 | 0.986 | Imputed   |
| rs11012679  | 10:18388401_A/C           | 0.046 | 0.717 | 0.889 | 0.698 | 1.131 | 0.338 | 0.966 | Imputed   |
| rs11014446  | 10:18771564_T/C           | 0.678 | 0.365 | 1.054 | 0.946 | 1.175 | 0.338 | 0.964 | Imputed   |
| rs77450573  | 10:18498577_T/A           | 0.047 | 0.191 | 0.887 | 0.693 | 1.135 | 0.339 | 0.929 | Imputed   |
| rs2357790   | 10:18423380_T/C           | 0.572 | 0.071 | 0.952 | 0.861 | 1.053 | 0.339 | 0.988 | Imputed   |
| rs1857423   | 10:18554588_T/C           | 0.163 | 0.125 | 1.070 | 0.931 | 1.229 | 0.339 | 0.938 | Imputed   |
| rs199744069 | 10:18410425_GGTGTGTGTGT/G | 0.178 | 0.057 | 1.068 | 0.934 | 1.220 | 0.339 | 0.940 | Imputed   |
| rs79720344  | 10:18478025_G/A           | 0.011 | 1.000 | 1.273 | 0.776 | 2.086 | 0.339 | 0.909 | Imputed   |
| rs12768464  | 10:18929856_A/C           | 0.134 | 0.942 | 1.083 | 0.920 | 1.274 | 0.340 | 0.834 | Imputed   |
| rs79489901  | 10:18496643_C/T           | 0.047 | 0.250 | 0.886 | 0.691 | 1.136 | 0.341 | 0.925 | Imputed   |
| rs201451514 | 10:18498564_A/AT          | 0.047 | 0.191 | 0.887 | 0.693 | 1.135 | 0.341 | 0.930 | Imputed   |
| rs183739682 | 10:18898978_T/A           | 0.025 | 0.741 | 1.169 | 0.848 | 1.611 | 0.341 | 0.953 | Imputed   |
| rs74327313  | 10:18482761_G/A           | 0.047 | 0.249 | 0.885 | 0.689 | 1.138 | 0.341 | 0.901 | Imputed   |
| rs34640527  | 10:18498212_A/C           | 0.047 | 0.191 | 0.887 | 0.693 | 1.135 | 0.341 | 0.929 | Imputed   |
| rs12359899  | 10:18498858_G/A           | 0.018 | 0.338 | 0.832 | 0.569 | 1.216 | 0.341 | 0.979 | Imputed   |
| rs17610062  | 10:18609967_C/T           | 0.114 | 0.034 | 0.924 | 0.785 | 1.088 | 0.343 | 0.902 | Imputed   |
| rs12572659  | 10:18425999_T/C           | 0.562 | 0.043 | 0.953 | 0.863 | 1.053 | 0.343 | 0.994 | Imputed   |
| rs113261455 | 10:18619746_C/T           | 0.116 | 0.219 | 0.925 | 0.788 | 1.087 | 0.343 | 0.925 | Imputed   |
| rs912985    | 10:18687678_A/G           | 0.032 | 0.796 | 0.869 | 0.651 | 1.161 | 0.343 | 0.964 | Imputed   |
| rs72787962  | 10:18878392_A/C           | 0.013 | 0.076 | 1.256 | 0.783 | 2.015 | 0.343 | 0.826 | Imputed   |
| 10:18555264 | 10:18555264_G/C           | 0.022 | 0.264 | 0.844 | 0.594 | 1.199 | 0.343 | 0.956 | Imputed   |
| rs11013023  | 10:18499851_T/C           | 0.018 | 0.338 | 0.833 | 0.570 | 1.217 | 0.345 | 0.984 | Imputed   |
| rs12764299  | 10:18927602_C/T           | 0.133 | 0.942 | 1.082 | 0.919 | 1.273 | 0.345 | 0.835 | Imputed   |
| rs12359226  | 10:18522109_G/A           | 0.015 | 0.218 | 0.820 | 0.544 | 1.238 | 0.345 | 0.950 | Imputed   |
| rs10828278  | 10:18447295_T/C           | 0.132 | 0.299 | 1.074 | 0.927 | 1.244 | 0.345 | 0.980 | Imputed   |
| rs9417384   | 10:18578725_T/C           | 0.257 | 0.000 | 0.942 | 0.833 | 1.066 | 0.345 | 0.841 | Imputed   |
| rs34774929  | 10:18686222_C/CGT         | 0.565 | 0.584 | 1.051 | 0.948 | 1.164 | 0.346 | 0.983 | Imputed   |
| rs71402180  | 10:18829252_TTA/T         | 0.451 | 0.010 | 0.951 | 0.857 | 1.056 | 0.346 | 0.925 | Imputed   |
| 10:18632063 | 10:18632063_G/A           | 0.003 | 1.000 | 0.638 | 0.250 | 1.628 | 0.347 | 0.923 | Imputed   |
| rs188625684 | 10:18777232_G/A           | 0.006 | 1.000 | 0.697 | 0.328 | 1.479 | 0.347 | 0.701 | Imputed   |
| rs10828609  | 10:18666129_G/A           | 0.010 | 0.019 | 1.314 | 0.743 | 2.324 | 0.347 | 0.728 | Imputed   |
| rs12221044  | 10:18413741_A/C           | 0.007 | 1.000 | 0.749 | 0.410 | 1.368 | 0.347 | 0.949 | Imputed   |
| rs35228203  | 10:18472265_A/AT          | 0.221 | 0.185 | 0.942 | 0.832 | 1.067 | 0.348 | 0.957 | Imputed   |
| rs148913230 | 10:18609026_AC/A          | 0.114 | 0.033 | 0.925 | 0.785 | 1.089 | 0.349 | 0.901 | Imputed   |
| rs17610248  | 10:18618034_C/T           | 0.116 | 0.191 | 0.926 | 0.788 | 1.088 | 0.349 | 0.921 | Imputed   |
| rs10828424  | 10:18579737_A/G           | 0.263 | 0.000 | 0.943 | 0.834 | 1.066 | 0.350 | 0.844 | Imputed   |
| rs9633646   | 10:18564922_G/A           | 0.709 | 0.000 | 0.948 | 0.848 | 1.060 | 0.351 | 0.943 | Imputed   |
| rs138048678 | 10:18523368_A/G           | 0.003 | 1.000 | 1.641 | 0.580 | 4.641 | 0.351 | 0.713 | Imputed   |
| rs77970529  | 10:18617179_C/T           | 0.116 | 0.166 | 0.926 | 0.788 | 1.088 | 0.351 | 0.919 | Imputed   |
| rs17610159  | 10:18617051_G/A           | 0.117 | 0.107 | 0.926 | 0.788 | 1.088 | 0.351 | 0.909 | Imputed   |
| rs78940953  | 10:18493595_G/C           | 0.046 | 0.250 | 0.888 | 0.692 | 1.141 | 0.353 | 0.919 | Imputed   |
| rs139020640 | 10:18876965_T/C           | 0.002 | 1.000 | 1.755 | 0.535 | 5.758 | 0.353 | 0.726 | Imputed   |
| rs10764369  | 10:18551154_G/A           | 0.333 | 0.000 | 1.055 | 0.943 | 1.180 | 0.354 | 0.864 | Imputed   |

## SUPPLEMENTARY DATA

|             |                        |       |       |       |       |       |       |       |           |
|-------------|------------------------|-------|-------|-------|-------|-------|-------|-------|-----------|
| rs10828388  | 10:18548482_C/A        | 0.550 | 0.097 | 1.048 | 0.949 | 1.157 | 0.354 | 0.996 | Imputed   |
| rs11013444  | 10:18591090_A/G        | 0.025 | 0.389 | 0.842 | 0.585 | 1.212 | 0.354 | 0.757 | Imputed   |
| rs11013218  | 10:18548489_C/A        | 0.550 | 0.097 | 1.048 | 0.949 | 1.157 | 0.354 | 0.996 | Imputed   |
| rs181760911 | 10:18350643_A/C        | 0.007 | 1.000 | 0.720 | 0.359 | 1.443 | 0.354 | 0.743 | Imputed   |
| rs951046    | 10:18550450_G/A        | 0.660 | 0.001 | 0.950 | 0.853 | 1.059 | 0.355 | 0.930 | Imputed   |
| rs190804440 | 10:18510565_G/A        | 0.015 | 0.218 | 0.824 | 0.547 | 1.242 | 0.355 | 0.980 | Imputed   |
| rs16917243  | 10:18673065_C/G        | 0.145 | 0.520 | 0.934 | 0.807 | 1.080 | 0.355 | 0.952 | Imputed   |
| rs7100144   | 10:18902367_C/A        | 0.267 | 0.025 | 0.946 | 0.840 | 1.065 | 0.355 | 0.910 | Imputed   |
| rs10828609  | 10:18666129_G/T        | 0.145 | 0.477 | 0.934 | 0.807 | 1.080 | 0.355 | 0.953 | Imputed   |
| rs139762074 | 10:18632081_A/G        | 0.009 | 1.000 | 0.760 | 0.425 | 1.359 | 0.355 | 0.897 | Imputed   |
| rs191237869 | 10:18859470_T/A        | 0.063 | 0.235 | 0.903 | 0.728 | 1.121 | 0.356 | 0.893 | Imputed   |
| rs59522345  | 10:18435405_AT/A       | 0.362 | 0.000 | 0.952 | 0.857 | 1.057 | 0.356 | 0.945 | Imputed   |
| rs188285787 | 10:18618798_G/A        | 0.003 | 1.000 | 0.643 | 0.251 | 1.646 | 0.357 | 0.915 | Imputed   |
| rs150109327 | 10:18842337_G/A        | 0.013 | 0.076 | 1.249 | 0.778 | 2.004 | 0.358 | 0.828 | Imputed   |
| rs61261116  | 10:18519967_T/C        | 0.113 | 1.000 | 1.079 | 0.917 | 1.270 | 0.358 | 0.949 | Imputed   |
| rs59462087  | 10:18522285_G/C        | 0.003 | 1.000 | 1.624 | 0.577 | 4.571 | 0.358 | 0.662 | Imputed   |
| rs139936446 | 10:18784444_G/A        | 0.001 | 1.000 | 2.000 | 0.456 | 8.777 | 0.358 | 0.943 | Imputed   |
| rs7099380   | 10:18549016_G/A        | 0.550 | 0.097 | 1.047 | 0.949 | 1.156 | 0.359 | 1.000 | Genotyped |
| rs56346389  | 10:18620934_A/G        | 0.118 | 0.225 | 0.928 | 0.792 | 1.088 | 0.359 | 0.930 | Imputed   |
| rs10828545  | 10:18629603_G/A        | 0.371 | 0.044 | 0.952 | 0.857 | 1.057 | 0.359 | 0.956 | Imputed   |
| rs117819731 | 10:18793577_T/C        | 0.005 | 1.000 | 1.480 | 0.640 | 3.419 | 0.359 | 0.683 | Imputed   |
| rs183126280 | 10:18783354_C/G        | 0.002 | 1.000 | 1.757 | 0.526 | 5.876 | 0.360 | 0.705 | Imputed   |
| rs1570940   | 10:18685765_C/T        | 0.174 | 0.698 | 1.065 | 0.930 | 1.220 | 0.360 | 0.957 | Imputed   |
| rs1277721   | 10:18553245_C/T        | 0.587 | 0.011 | 0.954 | 0.861 | 1.056 | 0.361 | 0.960 | Imputed   |
| rs191616180 | 10:18349845_G/A        | 0.006 | 1.000 | 0.710 | 0.340 | 1.482 | 0.362 | 0.759 | Imputed   |
| rs4748492   | 10:18866104_T/C        | 0.337 | 0.480 | 1.052 | 0.943 | 1.173 | 0.362 | 0.936 | Imputed   |
| rs151152185 | 10:18620437_C/CT       | 0.118 | 0.224 | 0.929 | 0.792 | 1.089 | 0.362 | 0.928 | Imputed   |
| rs77353696  | 10:18479339_G/C        | 0.064 | 0.897 | 1.103 | 0.894 | 1.361 | 0.362 | 0.937 | Imputed   |
| rs7077722   | 10:18865962_A/G        | 0.336 | 0.480 | 1.052 | 0.943 | 1.173 | 0.363 | 0.938 | Imputed   |
| rs113773281 | 10:18450558_CT/C       | 0.261 | 0.000 | 0.943 | 0.830 | 1.071 | 0.363 | 0.795 | Imputed   |
| rs181669987 | 10:18512788_C/T        | 0.002 | 1.000 | 0.565 | 0.165 | 1.935 | 0.363 | 0.649 | Imputed   |
| 10:18768139 | 10:18768139_A/T        | 0.002 | 1.000 | 0.570 | 0.169 | 1.920 | 0.364 | 0.708 | Imputed   |
| rs10828479  | 10:18605942_A/G        | 0.433 | 0.006 | 1.051 | 0.944 | 1.169 | 0.364 | 0.881 | Imputed   |
| rs143801577 | 10:18869086_A/T        | 0.003 | 1.000 | 0.581 | 0.180 | 1.877 | 0.364 | 0.642 | Imputed   |
| rs11014500  | 10:18782532_G/A        | 0.196 | 0.128 | 0.942 | 0.828 | 1.072 | 0.364 | 0.940 | Imputed   |
| rs1295882   | 10:18561134_T/C        | 0.805 | 0.095 | 1.061 | 0.933 | 1.206 | 0.365 | 0.957 | Imputed   |
| rs192861816 | 10:18474286_A/G        | 0.008 | 0.206 | 0.759 | 0.417 | 1.380 | 0.365 | 0.802 | Imputed   |
| rs1277739   | 10:18568957_G/A        | 0.571 | 0.039 | 0.955 | 0.864 | 1.055 | 0.366 | 0.994 | Imputed   |
| rs12778700  | 10:18385490_T/C        | 0.262 | 0.002 | 1.056 | 0.938 | 1.190 | 0.366 | 0.884 | Imputed   |
| rs73593800  | 10:18482044_T/G        | 0.067 | 0.690 | 1.102 | 0.893 | 1.359 | 0.367 | 0.909 | Imputed   |
| rs11012883  | 10:18468124_C/T        | 0.068 | 0.448 | 0.913 | 0.749 | 1.113 | 0.367 | 1.000 | Genotyped |
| rs12413478  | 10:18446475_T/C        | 0.128 | 0.479 | 1.071 | 0.922 | 1.244 | 0.367 | 0.980 | Imputed   |
| rs189149445 | 10:18682053_G/A        | 0.002 | 1.000 | 1.827 | 0.492 | 6.778 | 0.368 | 0.775 | Imputed   |
| rs73593798  | 10:18482018_G/A        | 0.066 | 0.690 | 1.101 | 0.893 | 1.359 | 0.368 | 0.912 | Imputed   |
| rs61131022  | 10:18478722_C/A        | 0.081 | 0.226 | 0.916 | 0.757 | 1.108 | 0.368 | 0.918 | Imputed   |
| 10:18592516 | 10:18592516_C/T        | 0.022 | 0.264 | 0.852 | 0.600 | 1.209 | 0.369 | 0.949 | Imputed   |
| 10:18854184 | 10:18854184_C/T        | 0.053 | 0.133 | 0.894 | 0.701 | 1.141 | 0.369 | 0.832 | Imputed   |
| rs144052690 | 10:18744776_T/G        | 0.003 | 1.000 | 1.695 | 0.536 | 5.359 | 0.369 | 0.721 | Imputed   |
| rs12770520  | 10:18425442_A/G        | 0.562 | 0.032 | 0.956 | 0.865 | 1.055 | 0.370 | 0.995 | Imputed   |
| rs78953094  | 10:18502160_T/A        | 0.049 | 0.355 | 0.894 | 0.700 | 1.142 | 0.370 | 0.905 | Imputed   |
| 10:18737336 | 10:18737336_G/A        | 0.003 | 1.000 | 1.684 | 0.538 | 5.269 | 0.370 | 0.658 | Imputed   |
| rs79917259  | 10:18627445_A/G        | 0.005 | 1.000 | 0.671 | 0.280 | 1.607 | 0.370 | 0.635 | Imputed   |
| rs17682394  | 10:18564128_A/G        | 0.137 | 0.442 | 0.932 | 0.798 | 1.088 | 0.371 | 0.883 | Imputed   |
| rs200582836 | 10:18806398_CCT/C      | 0.003 | 1.000 | 0.593 | 0.189 | 1.861 | 0.371 | 0.850 | Imputed   |
| rs58887549  | 10:18478667_G/A        | 0.067 | 0.432 | 0.910 | 0.740 | 1.119 | 0.371 | 0.926 | Imputed   |
| rs117051761 | 10:18798528_G/C        | 0.005 | 1.000 | 1.469 | 0.632 | 3.418 | 0.372 | 0.712 | Imputed   |
| rs78864692  | 10:18478066_T/A        | 0.067 | 0.433 | 0.910 | 0.740 | 1.119 | 0.373 | 0.931 | Imputed   |
| rs78607408  | 10:18386117_T/C        | 0.014 | 0.076 | 0.788 | 0.467 | 1.330 | 0.373 | 0.650 | Imputed   |
| rs10828773  | 10:18783325_G/A        | 0.196 | 0.115 | 0.943 | 0.828 | 1.073 | 0.373 | 0.937 | Imputed   |
| rs4443967   | 10:18581361_C/T        | 0.258 | 0.000 | 0.946 | 0.836 | 1.070 | 0.374 | 0.849 | Imputed   |
| rs11013615  | 10:18614236_A/C        | 0.051 | 0.071 | 0.897 | 0.705 | 1.140 | 0.374 | 0.874 | Imputed   |
| rs148098447 | 10:18892834_C/T        | 0.003 | 1.000 | 0.585 | 0.179 | 1.910 | 0.374 | 0.602 | Imputed   |
| rs74739177  | 10:18798999_T/C        | 0.005 | 1.000 | 1.465 | 0.629 | 3.411 | 0.375 | 0.712 | Imputed   |
| rs143103350 | 10:18817217_G/A        | 0.003 | 1.000 | 0.596 | 0.190 | 1.875 | 0.376 | 0.736 | Imputed   |
| rs116989529 | 10:18369023_G/A        | 0.009 | 0.001 | 1.304 | 0.724 | 2.347 | 0.376 | 0.729 | Imputed   |
| rs12245847  | 10:18538659_T/C        | 0.437 | 0.001 | 1.050 | 0.942 | 1.171 | 0.377 | 0.863 | Imputed   |
| rs11014485  | 10:18779709_C/G        | 0.234 | 0.331 | 0.947 | 0.838 | 1.069 | 0.377 | 0.934 | Imputed   |
| rs78025279  | 10:18627501_T/C        | 0.005 | 1.000 | 0.674 | 0.281 | 1.616 | 0.377 | 0.637 | Imputed   |
| 10:18616656 | 10:18616656_C/A        | 0.002 | 1.000 | 1.851 | 0.472 | 7.260 | 0.377 | 0.617 | Imputed   |
| 10:18892387 | 10:18892387_T/TTTTTT   | 0.002 | 1.000 | 1.854 | 0.471 | 7.303 | 0.378 | 0.639 | Imputed   |
| rs145262711 | 10:18410081_C/T        | 0.002 | 1.000 | 0.516 | 0.118 | 2.256 | 0.379 | 0.653 | Imputed   |
| rs151328173 | 10:18397332_T/C        | 0.017 | 0.073 | 1.236 | 0.770 | 1.985 | 0.380 | 0.647 | Imputed   |
| rs62634840  | 10:18859087_A/C        | 0.337 | 0.622 | 1.050 | 0.942 | 1.170 | 0.380 | 0.946 | Imputed   |
| rs10828528  | 10:18618917_G/A        | 0.204 | 0.021 | 0.945 | 0.833 | 1.072 | 0.380 | 0.941 | Imputed   |
| rs138559903 | 10:18684637_A/G        | 0.006 | 1.000 | 1.385 | 0.669 | 2.866 | 0.380 | 0.858 | Imputed   |
| rs7079325   | 10:18860469_T/C        | 0.337 | 0.622 | 1.050 | 0.942 | 1.170 | 0.380 | 0.943 | Imputed   |
| rs16916932  | 10:18476276_C/T        | 0.067 | 0.433 | 0.912 | 0.742 | 1.121 | 0.381 | 0.939 | Imputed   |
| rs117474518 | 10:18854191_G/T        | 0.054 | 0.135 | 0.899 | 0.709 | 1.140 | 0.381 | 0.855 | Imputed   |
| rs4748488   | 10:18862728_G/A        | 0.337 | 0.549 | 1.050 | 0.942 | 1.170 | 0.381 | 0.941 | Imputed   |
| rs57579336  | 10:18862380_T/C        | 0.337 | 0.573 | 1.050 | 0.942 | 1.170 | 0.381 | 0.941 | Imputed   |
| 10:18693047 | 10:18693047_T/A        | 0.002 | 1.000 | 1.786 | 0.487 | 6.548 | 0.381 | 0.812 | Imputed   |
| rs139697942 | 10:18874626_C/T        | 0.002 | 1.000 | 0.587 | 0.178 | 1.936 | 0.381 | 0.776 | Imputed   |
| rs60416694  | 10:18425654_A/G        | 0.364 | 0.047 | 0.955 | 0.862 | 1.059 | 0.382 | 0.991 | Imputed   |
| rs56278429  | 10:18571251_G/T        | 0.137 | 0.400 | 0.933 | 0.799 | 1.090 | 0.382 | 0.878 | Imputed   |
| rs7901551   | 10:18418804_A/G        | 0.580 | 0.015 | 0.956 | 0.863 | 1.058 | 0.382 | 0.963 | Imputed   |
| rs146947043 | 10:18848737_GGAAAAGA/G | 0.343 | 0.944 | 1.049 | 0.942 | 1.167 | 0.382 | 0.967 | Imputed   |
| rs11596960  | 10:18420326_G/A        | 0.562 | 0.032 | 0.957 | 0.867 | 1.056 | 0.383 | 1.000 | Genotyped |
| rs35663592  | 10:18813583_TA/T       | 0.421 | 0.012 | 1.048 | 0.944 | 1.163 | 0.383 | 0.926 | Imputed   |
| rs140099716 | 10:18496440_G/A        | 0.026 | 0.105 | 1.153 | 0.837 | 1.588 | 0.383 | 0.953 | Imputed   |
| rs7076247   | 10:18759629_T/C        | 0.657 | 0.440 | 1.048 | 0.944 | 1.163 | 0.383 | 0.999 | Genotyped |
| 10:18721764 | 10:18721764_A/AAAAA    | 0.368 | 0.013 | 0.953 | 0.856 | 1.062 | 0.383 | 0.924 | Imputed   |
| 10:18721764 | 10:18721764_A/AAAAA    | 0.368 | 0.013 | 0.953 | 0.856 | 1.062 | 0.383 | 0.924 | Imputed   |

## SUPPLEMENTARY DATA

|             |                       |       |       |       |       |        |       |       |           |
|-------------|-----------------------|-------|-------|-------|-------|--------|-------|-------|-----------|
| rs138130692 | 10:18721764_A/AAAAAC  | 0.368 | 0.013 | 0.953 | 0.856 | 1.062  | 0.383 | 0.924 | Imputed   |
| rs142882187 | 10:18721764_A/AAAAAC  | 0.368 | 0.013 | 0.953 | 0.856 | 1.062  | 0.383 | 0.924 | Imputed   |
| rs76385396  | 10:18633670_G/A       | 0.118 | 0.247 | 0.932 | 0.796 | 1.092  | 0.383 | 0.939 | Imputed   |
| rs10764314  | 10:18408415_C/T       | 0.071 | 0.259 | 0.916 | 0.752 | 1.116  | 0.384 | 0.962 | Imputed   |
| 10:18371923 | 10:18371923_ATCTG/A   | 0.003 | 1.000 | 1.624 | 0.545 | 4.837  | 0.384 | 0.643 | Imputed   |
| 10:18736614 | 10:18736614_G/A       | 0.001 | 1.000 | 1.987 | 0.424 | 9.317  | 0.384 | 0.729 | Imputed   |
| rs149514542 | 10:18461012_T/C       | 0.028 | 0.770 | 1.149 | 0.841 | 1.570  | 0.384 | 0.964 | Imputed   |
| rs117605949 | 10:18715104_T/G       | 0.021 | 0.003 | 1.172 | 0.820 | 1.675  | 0.384 | 0.891 | Imputed   |
| rs73595538  | 10:18500464_A/G       | 0.065 | 0.689 | 1.098 | 0.889 | 1.357  | 0.385 | 0.922 | Imputed   |
| rs117512373 | 10:18463105_C/G       | 0.028 | 0.770 | 1.149 | 0.840 | 1.571  | 0.386 | 0.959 | Imputed   |
| rs80171629  | 10:18401407_C/T       | 0.038 | 0.487 | 0.886 | 0.673 | 1.166  | 0.386 | 0.909 | Imputed   |
| rs142073748 | 10:18691733_C/T       | 0.002 | 1.000 | 1.776 | 0.484 | 6.516  | 0.386 | 0.821 | Imputed   |
| rs116550339 | 10:18627858_G/A       | 0.006 | 1.000 | 0.681 | 0.285 | 1.626  | 0.387 | 0.625 | Imputed   |
| 10:18441652 | 10:18441652_A/C       | 0.061 | 0.072 | 1.123 | 0.864 | 1.460  | 0.387 | 0.632 | Imputed   |
| rs141002016 | 10:18348656_G/C       | 0.006 | 1.000 | 0.718 | 0.339 | 1.521  | 0.387 | 0.786 | Imputed   |
| rs142664846 | 10:18899659_C/T       | 0.022 | 0.668 | 1.174 | 0.816 | 1.689  | 0.388 | 0.919 | Imputed   |
| rs12765864  | 10:18778071_C/T       | 0.755 | 0.231 | 0.948 | 0.841 | 1.070  | 0.388 | 0.925 | Imputed   |
| rs17683651  | 10:18640306_A/T       | 0.118 | 0.219 | 0.933 | 0.797 | 1.092  | 0.388 | 0.948 | Imputed   |
| rs2497821   | 10:18369959_A/T       | 0.713 | 0.464 | 0.951 | 0.848 | 1.066  | 0.389 | 0.935 | Imputed   |
| rs1570939   | 10:18685891_A/G       | 0.564 | 0.822 | 1.046 | 0.944 | 1.159  | 0.389 | 0.984 | Imputed   |
| rs11013640  | 10:18617264_A/G       | 0.051 | 0.075 | 0.901 | 0.709 | 1.143  | 0.390 | 0.884 | Imputed   |
| rs10764520  | 10:18758481_T/C       | 0.657 | 0.400 | 1.047 | 0.943 | 1.163  | 0.391 | 0.991 | Imputed   |
| rs185247009 | 10:18587356_T/C       | 0.001 | 1.000 | 2.210 | 0.358 | 13.645 | 0.393 | 0.627 | Imputed   |
| rs142171303 | 10:18505260_TAA/T     | 0.019 | 0.363 | 0.849 | 0.582 | 1.237  | 0.393 | 0.923 | Imputed   |
| rs142809840 | 10:18466303_C/A       | 0.028 | 0.770 | 1.145 | 0.839 | 1.562  | 0.393 | 0.959 | Imputed   |
| rs4748456   | 10:18648270_G/A       | 0.116 | 0.360 | 0.934 | 0.797 | 1.094  | 0.395 | 0.955 | Imputed   |
| rs1888693   | 10:18440444_G/A       | 0.372 | 0.028 | 0.957 | 0.864 | 1.059  | 0.395 | 0.990 | Imputed   |
| rs116904264 | 10:18353396_G/A       | 0.005 | 1.000 | 0.695 | 0.300 | 1.607  | 0.395 | 0.764 | Imputed   |
| rs1000266   | 10:18605752_G/C       | 0.134 | 1.000 | 0.934 | 0.797 | 1.094  | 0.395 | 0.871 | Imputed   |
| rs78862070  | 10:18486293_G/A       | 0.060 | 1.000 | 0.906 | 0.721 | 1.138  | 0.396 | 0.863 | Imputed   |
| rs192080074 | 10:18487058_A/G       | 0.060 | 1.000 | 0.906 | 0.721 | 1.139  | 0.397 | 0.863 | Imputed   |
| rs4748466   | 10:18733293_A/G       | 0.159 | 0.953 | 1.061 | 0.925 | 1.218  | 0.397 | 0.988 | Imputed   |
| rs182190321 | 10:18375596_C/T       | 0.006 | 0.004 | 1.336 | 0.683 | 2.614  | 0.397 | 0.882 | Imputed   |
| rs141967693 | 10:18604261_AAAAAAC/A | 0.426 | 0.000 | 0.954 | 0.857 | 1.063  | 0.397 | 0.865 | Imputed   |
| rs12358164  | 10:18450043_A/C       | 0.374 | 0.636 | 0.957 | 0.863 | 1.060  | 0.397 | 1.000 | Genotyped |
| rs61844172  | 10:18449944_T/A       | 0.374 | 0.636 | 0.957 | 0.863 | 1.060  | 0.398 | 1.000 | Genotyped |
| 10:18850265 | 10:18850265_T/TGGAGA  | 0.114 | 0.000 | 1.091 | 0.892 | 1.334  | 0.399 | 0.602 | Imputed   |
| rs7904263   | 10:18880525_C/A       | 0.330 | 0.201 | 1.049 | 0.939 | 1.171  | 0.400 | 0.920 | Imputed   |
| rs141194617 | 10:18495307_G/A       | 0.006 | 1.000 | 1.411 | 0.633 | 3.145  | 0.400 | 0.625 | Imputed   |
| rs200804725 | 10:18367217_C/CA      | 0.010 | 1.000 | 1.297 | 0.707 | 2.377  | 0.401 | 0.712 | Imputed   |
| rs9787537   | 10:18608471_C/G       | 0.149 | 0.018 | 0.940 | 0.813 | 1.086  | 0.401 | 0.907 | Imputed   |
| rs73595514  | 10:18490018_T/A       | 0.049 | 0.251 | 0.899 | 0.701 | 1.153  | 0.401 | 0.873 | Imputed   |
| rs62636218  | 10:18862244_T/A       | 0.331 | 0.570 | 1.048 | 0.939 | 1.169  | 0.401 | 0.939 | Imputed   |
| rs10828871  | 10:18827779_A/G       | 0.341 | 0.726 | 1.046 | 0.941 | 1.162  | 0.402 | 0.995 | Imputed   |
| rs71497251  | 10:18781265_C/A       | 0.182 | 0.392 | 0.944 | 0.825 | 1.080  | 0.402 | 0.917 | Imputed   |
| rs2799571   | 10:18644913_A/G       | 0.871 | 0.471 | 1.069 | 0.915 | 1.249  | 0.402 | 0.925 | Imputed   |
| rs72787963  | 10:18883224_A/G       | 0.330 | 0.177 | 1.048 | 0.939 | 1.171  | 0.403 | 0.920 | Imputed   |
| rs78737394  | 10:18641407_A/C       | 0.121 | 0.225 | 0.935 | 0.800 | 1.094  | 0.403 | 0.944 | Imputed   |
| rs10764603  | 10:18883867_T/C       | 0.330 | 0.177 | 1.048 | 0.939 | 1.171  | 0.403 | 0.920 | Imputed   |
| rs77141557  | 10:18641481_C/A       | 0.121 | 0.225 | 0.935 | 0.800 | 1.094  | 0.404 | 0.945 | Imputed   |
| rs4748467   | 10:18733661_A/G       | 0.160 | 0.953 | 1.060 | 0.924 | 1.216  | 0.404 | 0.987 | Imputed   |
| rs10764601  | 10:18883614_G/A       | 0.330 | 0.177 | 1.048 | 0.939 | 1.171  | 0.404 | 0.920 | Imputed   |
| 10:18829274 | 10:18829274_T/TCA     | 0.021 | 0.145 | 1.171 | 0.807 | 1.701  | 0.406 | 0.864 | Imputed   |
| rs181752861 | 10:18881172_A/G       | 0.002 | 1.000 | 1.651 | 0.505 | 5.399  | 0.407 | 0.820 | Imputed   |
| rs113546040 | 10:18646118_C/A       | 0.117 | 0.324 | 0.935 | 0.799 | 1.095  | 0.407 | 0.953 | Imputed   |
| rs3841459   | 10:18828721_C/CAA     | 0.341 | 0.726 | 1.046 | 0.941 | 1.162  | 0.407 | 0.995 | Imputed   |
| rs67427028  | 10:18606260_A/G       | 0.133 | 1.000 | 0.935 | 0.799 | 1.095  | 0.407 | 0.876 | Imputed   |
| rs11013004  | 10:18496736_A/G       | 0.019 | 0.338 | 0.852 | 0.582 | 1.246  | 0.409 | 0.906 | Imputed   |
| rs2482109   | 10:18525170_G/A       | 0.819 | 0.008 | 0.946 | 0.829 | 1.079  | 0.409 | 0.938 | Imputed   |
| rs78778209  | 10:18458005_A/G       | 0.028 | 0.770 | 1.138 | 0.837 | 1.549  | 0.409 | 0.985 | Imputed   |
| rs11596974  | 10:18420384_G/A       | 0.366 | 0.061 | 0.958 | 0.865 | 1.061  | 0.409 | 1.000 | Genotyped |
| rs35698731  | 10:18906114_GT/G      | 0.285 | 0.000 | 0.950 | 0.842 | 1.073  | 0.409 | 0.833 | Imputed   |
| rs7097001   | 10:18839971_A/T       | 0.425 | 0.845 | 0.958 | 0.864 | 1.061  | 0.409 | 0.962 | Imputed   |
| rs12218657  | 10:18507688_C/T       | 0.020 | 0.252 | 0.847 | 0.571 | 1.257  | 0.410 | 0.808 | Imputed   |
| rs1757222   | 10:18535012_G/A       | 0.814 | 0.001 | 0.945 | 0.827 | 1.081  | 0.410 | 0.888 | Imputed   |
| rs142304386 | 10:18683230_G/A       | 0.001 | 1.000 | 0.512 | 0.104 | 2.515  | 0.410 | 0.735 | Imputed   |
| rs185226987 | 10:18644566_T/A       | 0.040 | 0.674 | 0.895 | 0.688 | 1.165  | 0.410 | 0.919 | Imputed   |
| rs75346736  | 10:18696005_A/G       | 0.021 | 0.004 | 1.161 | 0.814 | 1.655  | 0.410 | 0.903 | Imputed   |
| rs12219357  | 10:18507713_T/A       | 0.020 | 0.252 | 0.847 | 0.571 | 1.257  | 0.410 | 0.808 | Imputed   |
| rs7893163   | 10:18511623_T/G       | 0.705 | 0.494 | 1.047 | 0.939 | 1.167  | 0.411 | 0.997 | Imputed   |
| rs180916830 | 10:18391162_C/T       | 0.003 | 1.000 | 0.600 | 0.177 | 2.028  | 0.411 | 0.619 | Imputed   |
| rs117995836 | 10:18825363_T/G       | 0.020 | 0.666 | 1.162 | 0.812 | 1.664  | 0.411 | 0.979 | Imputed   |
| rs11013616  | 10:18614296_A/T       | 0.133 | 0.726 | 0.937 | 0.802 | 1.095  | 0.411 | 0.905 | Imputed   |
| rs56241630  | 10:18472127_A/G       | 0.066 | 0.433 | 0.918 | 0.750 | 1.125  | 0.411 | 0.969 | Imputed   |
| rs10764316  | 10:18409507_C/G       | 0.354 | 0.032 | 0.958 | 0.863 | 1.062  | 0.411 | 0.992 | Imputed   |
| 10:18614626 | 10:18614626_T/C       | 0.084 | 0.000 | 0.918 | 0.749 | 1.126  | 0.412 | 0.745 | Imputed   |
| rs187143229 | 10:18766886_G/A       | 0.004 | 1.000 | 1.458 | 0.592 | 3.593  | 0.412 | 0.767 | Imputed   |
| rs148155043 | 10:18789321_A/G       | 0.001 | 1.000 | 0.438 | 0.061 | 3.157  | 0.412 | 0.703 | Imputed   |
| rs113099917 | 10:18648417_C/G       | 0.146 | 0.751 | 0.941 | 0.814 | 1.088  | 0.413 | 0.956 | Imputed   |
| rs11335257  | 10:18556124_AT/A      | 0.825 | 0.127 | 1.058 | 0.925 | 1.209  | 0.413 | 0.947 | Imputed   |
| rs74667294  | 10:18636423_A/T       | 0.120 | 0.254 | 0.937 | 0.800 | 1.096  | 0.414 | 0.943 | Imputed   |
| rs74521946  | 10:18387642_T/G       | 0.010 | 0.249 | 1.284 | 0.705 | 2.336  | 0.414 | 0.709 | Imputed   |
| rs12414422  | 10:18426605_C/T       | 0.036 | 1.000 | 0.894 | 0.682 | 1.170  | 0.414 | 0.959 | Imputed   |
| rs147553898 | 10:18423904_G/A       | 0.004 | 1.000 | 1.477 | 0.578 | 3.772  | 0.415 | 0.812 | Imputed   |
| rs185652592 | 10:18913888_T/C       | 0.024 | 0.162 | 1.150 | 0.822 | 1.608  | 0.415 | 0.956 | Imputed   |
| 10:18493943 | 10:18493943_G/A       | 0.003 | 1.000 | 0.629 | 0.205 | 1.924  | 0.416 | 0.778 | Imputed   |
| rs140816369 | 10:18536369_A/G       | 0.004 | 0.034 | 1.440 | 0.597 | 3.475  | 0.417 | 0.705 | Imputed   |
| rs11012743  | 10:18408949_A/G       | 0.367 | 0.125 | 0.958 | 0.865 | 1.062  | 0.417 | 0.999 | Imputed   |
| rs10828254  | 10:18409137_A/G       | 0.367 | 0.125 | 0.958 | 0.865 | 1.062  | 0.417 | 1.000 | Genotyped |
| rs11012723  | 10:18400311_A/G       | 0.283 | 0.193 | 0.953 | 0.849 | 1.070  | 0.417 | 0.920 | Imputed   |
| rs145769477 | 10:18687758_T/C       | 0.004 | 1.000 | 1.538 | 0.542 | 4.363  | 0.419 | 0.606 | Imputed   |
| rs10764315  | 10:18409449_T/C       | 0.367 | 0.125 | 0.959 | 0.865 | 1.062  | 0.419 | 1.000 | Imputed   |

## SUPPLEMENTARY DATA

|             |                          |       |       |       |       |        |       |       |           |
|-------------|--------------------------|-------|-------|-------|-------|--------|-------|-------|-----------|
| rs371032713 | 10:18779793_T/G          | 0.006 | 1.000 | 1.400 | 0.618 | 3.170  | 0.419 | 0.671 | Imputed   |
| rs10828650  | 10:18691531_A/G          | 0.286 | 0.787 | 1.047 | 0.936 | 1.171  | 0.420 | 0.984 | Imputed   |
| rs36092550  | 10:18888869_TAA/T        | 0.131 | 0.522 | 1.068 | 0.909 | 1.255  | 0.420 | 0.870 | Imputed   |
| rs370626377 | 10:18615110_AAT/A        | 0.132 | 0.673 | 0.938 | 0.803 | 1.096  | 0.421 | 0.911 | Imputed   |
| rs146319391 | 10:18856334_T/C          | 0.039 | 0.194 | 0.892 | 0.676 | 1.178  | 0.421 | 0.861 | Imputed   |
| rs10828318  | 10:18506643_G/C          | 0.215 | 0.693 | 0.947 | 0.830 | 1.081  | 0.422 | 0.869 | Imputed   |
| rs140808895 | 10:18477760_C/T          | 0.025 | 0.545 | 0.847 | 0.565 | 1.270  | 0.422 | 0.641 | Imputed   |
| rs78230290  | 10:18504524_C/T          | 0.047 | 0.353 | 0.904 | 0.707 | 1.156  | 0.422 | 0.926 | Imputed   |
| rs77952637  | 10:18597112_C/T          | 0.201 | 0.007 | 0.947 | 0.829 | 1.082  | 0.422 | 0.873 | Imputed   |
| rs188960840 | 10:18370178_T/A          | 0.002 | 1.000 | 1.764 | 0.440 | 7.082  | 0.423 | 0.894 | Imputed   |
| rs72786006  | 10:18593125_G/T          | 0.268 | 0.002 | 0.952 | 0.843 | 1.075  | 0.423 | 0.858 | Imputed   |
| rs4146986   | 10:18617582_A/C          | 0.021 | 0.383 | 0.856 | 0.584 | 1.254  | 0.424 | 0.835 | Imputed   |
| rs10741091  | 10:18802307_C/G          | 0.338 | 0.504 | 1.045 | 0.939 | 1.162  | 0.424 | 0.971 | Imputed   |
| rs1277734   | 10:18577847_G/A          | 0.251 | 0.000 | 0.951 | 0.840 | 1.076  | 0.424 | 0.851 | Imputed   |
| rs142336079 | 10:18405480_G/T          | 0.006 | 1.000 | 1.387 | 0.622 | 3.093  | 0.424 | 0.680 | Imputed   |
| rs7914364   | 10:18511668_C/G          | 0.706 | 0.425 | 1.045 | 0.937 | 1.166  | 0.424 | 0.996 | Imputed   |
| rs374685784 | 10:18909286_G/A          | 0.003 | 1.000 | 0.614 | 0.185 | 2.034  | 0.424 | 0.613 | Imputed   |
| rs11013732  | 10:18633239_G/C          | 0.006 | 1.000 | 0.704 | 0.297 | 1.668  | 0.425 | 0.640 | Imputed   |
| rs11013733  | 10:18633388_T/C          | 0.006 | 1.000 | 0.704 | 0.297 | 1.668  | 0.425 | 0.637 | Imputed   |
| rs11013731  | 10:18633232_G/C          | 0.005 | 1.000 | 0.704 | 0.297 | 1.670  | 0.426 | 0.641 | Imputed   |
| rs10828872  | 10:18830618_C/T          | 0.339 | 0.725 | 1.044 | 0.939 | 1.160  | 0.426 | 0.994 | Imputed   |
| rs73595532  | 10:18498346_A/G          | 0.034 | 0.610 | 0.888 | 0.664 | 1.189  | 0.426 | 0.893 | Imputed   |
| rs7072759   | 10:18571215_A/G          | 0.416 | 0.193 | 1.042 | 0.942 | 1.151  | 0.426 | 1.000 | Genotyped |
| rs3750591   | 10:18691153_G/A          | 0.282 | 0.938 | 1.047 | 0.935 | 1.171  | 0.428 | 0.976 | Imputed   |
| rs11300164  | 10:18598209_CA/C         | 0.201 | 0.005 | 0.948 | 0.830 | 1.083  | 0.430 | 0.874 | Imputed   |
| rs117455966 | 10:18676022_G/A          | 0.042 | 0.838 | 0.902 | 0.697 | 1.166  | 0.430 | 0.924 | Imputed   |
| rs72780060  | 10:18351673_T/C          | 0.016 | 0.532 | 1.195 | 0.767 | 1.862  | 0.430 | 0.834 | Imputed   |
| rs7896848   | 10:18597958_G/A          | 0.201 | 0.005 | 0.948 | 0.830 | 1.083  | 0.431 | 0.874 | Imputed   |
| rs79172000  | 10:18441240_A/G          | 0.028 | 1.000 | 1.131 | 0.833 | 1.535  | 0.432 | 0.977 | Imputed   |
| rs4285782   | 10:18886478_T/G          | 0.334 | 0.359 | 1.045 | 0.937 | 1.166  | 0.432 | 0.931 | Imputed   |
| rs72784234  | 10:18578722_C/A          | 0.002 | 1.000 | 0.590 | 0.158 | 2.199  | 0.432 | 0.775 | Imputed   |
| rs7922550   | 10:18817083_T/G          | 0.339 | 0.598 | 1.043 | 0.939 | 1.159  | 0.432 | 0.991 | Imputed   |
| rs1298103   | 10:18643513_T/C          | 0.876 | 0.293 | 1.065 | 0.910 | 1.248  | 0.432 | 0.931 | Imputed   |
| rs77358141  | 10:18456259_C/T          | 0.028 | 0.770 | 1.131 | 0.832 | 1.538  | 0.433 | 0.987 | Imputed   |
| rs4279920   | 10:18897544_C/G          | 0.076 | 1.000 | 0.925 | 0.760 | 1.125  | 0.433 | 0.923 | Imputed   |
| rs10828268  | 10:18436647_T/A          | 0.112 | 0.000 | 0.940 | 0.804 | 1.098  | 0.433 | 0.979 | Imputed   |
| rs139102261 | 10:18506197_G/C          | 0.048 | 0.353 | 0.907 | 0.710 | 1.159  | 0.433 | 0.912 | Imputed   |
| rs7900405   | 10:18765673_A/G          | 0.637 | 0.516 | 1.042 | 0.940 | 1.156  | 0.434 | 0.990 | Imputed   |
| rs150739337 | 10:18337209_G/A          | 0.020 | 1.000 | 1.160 | 0.800 | 1.682  | 0.434 | 0.923 | Imputed   |
| rs116976610 | 10:18456156_T/C          | 0.028 | 0.770 | 1.130 | 0.831 | 1.537  | 0.435 | 0.988 | Imputed   |
| rs75405946  | 10:18623315_G/A          | 0.021 | 0.383 | 0.860 | 0.589 | 1.256  | 0.435 | 0.828 | Imputed   |
| rs112119263 | 10:18798525_C/G          | 0.123 | 0.652 | 0.940 | 0.804 | 1.099  | 0.435 | 0.953 | Imputed   |
| rs10828253  | 10:18408883_T/C          | 0.081 | 0.059 | 0.929 | 0.772 | 1.118  | 0.435 | 0.963 | Imputed   |
| rs12354739  | 10:18796693_T/C          | 0.122 | 0.652 | 0.940 | 0.804 | 1.099  | 0.436 | 0.950 | Imputed   |
| 10:18796565 | 10:18796565_C/CAAAAAAAAA | 0.122 | 0.652 | 0.940 | 0.804 | 1.099  | 0.436 | 0.949 | Imputed   |
| rs73595550  | 10:18503690_T/C          | 0.034 | 0.610 | 0.891 | 0.667 | 1.191  | 0.436 | 0.903 | Imputed   |
| rs189315389 | 10:18387884_A/T          | 0.037 | 0.008 | 0.892 | 0.670 | 1.189  | 0.436 | 0.833 | Imputed   |
| rs11015048  | 10:18885887_G/C          | 0.336 | 0.397 | 1.044 | 0.936 | 1.165  | 0.436 | 0.931 | Imputed   |
| rs7902015   | 10:18511646_G/A          | 0.715 | 0.374 | 1.045 | 0.936 | 1.166  | 0.436 | 0.995 | Imputed   |
| 10:18422442 | 10:18422442_G/GA         | 0.044 | 0.139 | 1.108 | 0.856 | 1.435  | 0.436 | 0.871 | Imputed   |
| rs74793146  | 10:18447490_A/G          | 0.028 | 1.000 | 1.131 | 0.829 | 1.544  | 0.436 | 0.977 | Imputed   |
| rs17605326  | 10:18466025_T/C          | 0.029 | 0.770 | 1.131 | 0.829 | 1.543  | 0.437 | 0.956 | Imputed   |
| rs7894016   | 10:18887709_T/G          | 0.336 | 0.359 | 1.044 | 0.936 | 1.165  | 0.437 | 0.930 | Imputed   |
| rs112938922 | 10:18799409_G/A          | 0.122 | 0.651 | 0.940 | 0.804 | 1.099  | 0.437 | 0.954 | Imputed   |
| rs115311046 | 10:18622939_T/C          | 0.021 | 0.383 | 0.861 | 0.590 | 1.256  | 0.437 | 0.823 | Imputed   |
| rs114639408 | 10:18622937_G/A          | 0.021 | 0.383 | 0.861 | 0.590 | 1.256  | 0.437 | 0.823 | Imputed   |
| 10:18833569 | 10:18833569_T/C          | 0.002 | 1.000 | 1.635 | 0.473 | 5.653  | 0.438 | 0.885 | Imputed   |
| rs182884839 | 10:18416569_A/C          | 0.001 | 1.000 | 1.962 | 0.357 | 10.783 | 0.438 | 0.720 | Imputed   |
| rs79395114  | 10:18623187_G/C          | 0.021 | 0.383 | 0.861 | 0.590 | 1.257  | 0.438 | 0.829 | Imputed   |
| rs7097680   | 10:18569671_A/G          | 0.424 | 0.075 | 1.040 | 0.941 | 1.150  | 0.438 | 0.996 | Imputed   |
| rs188663361 | 10:18415719_G/A          | 0.001 | 1.000 | 1.960 | 0.357 | 10.772 | 0.439 | 0.715 | Imputed   |
| rs149522586 | 10:18798744_G/GA         | 0.123 | 0.652 | 0.940 | 0.804 | 1.099  | 0.439 | 0.952 | Imputed   |
| rs17620201  | 10:18798755_C/T          | 0.123 | 0.652 | 0.940 | 0.804 | 1.099  | 0.439 | 0.952 | Imputed   |
| rs10828870  | 10:18826813_T/C          | 0.341 | 0.726 | 1.043 | 0.938 | 1.159  | 0.439 | 0.993 | Imputed   |
| rs2489201   | 10:18510448_G/A          | 0.704 | 0.519 | 1.044 | 0.936 | 1.164  | 0.439 | 0.994 | Imputed   |
| rs7897853   | 10:18505654_T/A          | 0.034 | 0.610 | 0.892 | 0.667 | 1.192  | 0.439 | 0.903 | Imputed   |
| rs7917584   | 10:18820848_G/A          | 0.339 | 0.699 | 1.043 | 0.938 | 1.159  | 0.439 | 0.991 | Imputed   |
| rs113944683 | 10:18369523_A/G          | 0.010 | 0.249 | 1.287 | 0.679 | 2.438  | 0.440 | 0.633 | Imputed   |
| rs111234103 | 10:18541727_A/G          | 0.011 | 1.000 | 1.221 | 0.736 | 2.025  | 0.440 | 0.848 | Imputed   |
| rs6482533   | 10:18867838_C/T          | 0.337 | 0.597 | 1.044 | 0.936 | 1.164  | 0.440 | 0.937 | Imputed   |
| rs12355360  | 10:18793723_A/G          | 0.122 | 0.494 | 0.940 | 0.803 | 1.100  | 0.440 | 0.943 | Imputed   |
| rs61842423  | 10:18411022_G/T          | 0.154 | 0.853 | 0.946 | 0.820 | 1.090  | 0.440 | 0.948 | Imputed   |
| rs12570360  | 10:18847625_C/T          | 0.074 | 0.909 | 0.927 | 0.764 | 1.124  | 0.441 | 0.976 | Imputed   |
| rs7901394   | 10:18505937_T/C          | 0.034 | 0.610 | 0.892 | 0.668 | 1.192  | 0.441 | 0.903 | Imputed   |
| rs61842440  | 10:18442635_C/T          | 0.139 | 0.470 | 0.945 | 0.818 | 1.092  | 0.441 | 0.991 | Imputed   |
| rs11013184  | 10:18541100_A/T          | 0.429 | 0.000 | 1.043 | 0.936 | 1.162  | 0.442 | 0.874 | Imputed   |
| rs10764582  | 10:18823279_T/A          | 0.341 | 0.700 | 1.042 | 0.938 | 1.158  | 0.442 | 0.992 | Imputed   |
| rs182245088 | 10:18516044_A/G          | 0.005 | 1.000 | 1.400 | 0.593 | 3.303  | 0.442 | 0.668 | Imputed   |
| rs139276863 | 10:18369310_T/TTA        | 0.074 | 0.108 | 0.920 | 0.745 | 1.137  | 0.442 | 0.804 | Imputed   |
| rs1277843   | 10:18633622_C/T          | 0.606 | 0.001 | 0.960 | 0.864 | 1.066  | 0.443 | 0.925 | Imputed   |
| rs7070430   | 10:18700676_A/C          | 0.704 | 0.325 | 0.957 | 0.856 | 1.071  | 0.443 | 0.972 | Imputed   |
| rs10764600  | 10:18878334_G/A          | 0.336 | 0.438 | 1.044 | 0.936 | 1.164  | 0.443 | 0.931 | Imputed   |
| rs10828965  | 10:18878881_T/C          | 0.336 | 0.438 | 1.044 | 0.936 | 1.164  | 0.443 | 0.931 | Imputed   |
| rs11525266  | 10:18879183_T/C          | 0.336 | 0.438 | 1.044 | 0.936 | 1.164  | 0.443 | 0.931 | Imputed   |
| rs112628506 | 10:18461921_C/T          | 0.066 | 1.000 | 1.083 | 0.883 | 1.329  | 0.445 | 0.960 | Imputed   |
| rs117577136 | 10:18607245_C/A          | 0.117 | 0.030 | 0.939 | 0.798 | 1.104  | 0.445 | 0.896 | Imputed   |
| rs113461365 | 10:18461528_C/A          | 0.066 | 1.000 | 1.083 | 0.883 | 1.329  | 0.445 | 0.960 | Imputed   |
| rs1409205   | 10:18764075_G/A          | 0.956 | 0.256 | 1.099 | 0.863 | 1.400  | 0.445 | 0.980 | Imputed   |
| rs61842424  | 10:18415186_G/A          | 0.154 | 0.951 | 0.946 | 0.821 | 1.091  | 0.446 | 0.954 | Imputed   |
| rs7078884   | 10:18792105_C/T          | 0.521 | 0.012 | 1.041 | 0.939 | 1.155  | 0.446 | 0.932 | Imputed   |
| rs7085587   | 10:18792089_A/G          | 0.521 | 0.009 | 1.041 | 0.938 | 1.155  | 0.446 | 0.931 | Imputed   |
| rs12255303  | 10:18372986_A/G          | 0.133 | 0.776 | 0.942 | 0.808 | 1.099  | 0.446 | 0.924 | Imputed   |

## SUPPLEMENTARY DATA

|             |                                    |       |       |       |       |       |       |       |           |
|-------------|------------------------------------|-------|-------|-------|-------|-------|-------|-------|-----------|
| rs187893347 | 10:18685288_G/C                    | 0.020 | 0.113 | 1.157 | 0.795 | 1.683 | 0.447 | 0.880 | Imputed   |
| rs7090293   | 10:18792385_T/C                    | 0.521 | 0.011 | 1.041 | 0.938 | 1.155 | 0.447 | 0.932 | Imputed   |
| rs7086034   | 10:18792398_A/G                    | 0.521 | 0.011 | 1.041 | 0.938 | 1.155 | 0.447 | 0.933 | Imputed   |
| 10:18338462 | 10:18338462_A/T                    | 0.003 | 1.000 | 1.498 | 0.529 | 4.246 | 0.447 | 0.786 | Imputed   |
| rs11440498  | 10:18773350_A/AT                   | 0.956 | 0.182 | 1.100 | 0.860 | 1.407 | 0.447 | 0.953 | Imputed   |
| rs10828896  | 10:18838854_A/G                    | 0.340 | 0.833 | 1.042 | 0.937 | 1.158 | 0.447 | 0.994 | Imputed   |
| rs1779215   | 10:18511477_A/G                    | 0.704 | 0.519 | 1.043 | 0.936 | 1.163 | 0.447 | 0.999 | Imputed   |
| rs140352326 | 10:18842644_AAATGGGAGAATGG/A       | 0.338 | 0.833 | 1.042 | 0.937 | 1.159 | 0.448 | 0.978 | Imputed   |
| rs12569474  | 10:18839176_C/T                    | 0.340 | 0.833 | 1.042 | 0.937 | 1.158 | 0.448 | 0.993 | Imputed   |
| rs7901598   | 10:18839779_G/A                    | 0.340 | 0.833 | 1.042 | 0.937 | 1.158 | 0.448 | 0.991 | Imputed   |
| rs7090112   | 10:18774727_C/G                    | 0.956 | 0.182 | 1.100 | 0.860 | 1.407 | 0.448 | 0.948 | Imputed   |
| rs72784236  | 10:18580223_T/C                    | 0.038 | 1.000 | 0.896 | 0.674 | 1.190 | 0.448 | 0.841 | Imputed   |
| rs114608102 | 10:18850968_G/C                    | 0.339 | 0.833 | 1.042 | 0.936 | 1.161 | 0.449 | 0.962 | Imputed   |
| rs10828911  | 10:18843358_G/A                    | 0.340 | 0.833 | 1.042 | 0.937 | 1.159 | 0.449 | 0.982 | Imputed   |
| rs114496140 | 10:18851090_T/C                    | 0.339 | 0.833 | 1.042 | 0.936 | 1.161 | 0.449 | 0.961 | Imputed   |
| rs16917091  | 10:18533377_A/C                    | 0.112 | 0.006 | 1.069 | 0.899 | 1.271 | 0.449 | 0.831 | Imputed   |
| rs1757220   | 10:18511016_G/A                    | 0.704 | 0.519 | 1.043 | 0.935 | 1.163 | 0.450 | 1.000 | Imputed   |
| rs117369996 | 10:18679164_C/T                    | 0.026 | 0.715 | 1.146 | 0.804 | 1.634 | 0.451 | 0.815 | Imputed   |
| rs76883574  | 10:18472279_A/C                    | 0.053 | 0.081 | 0.918 | 0.735 | 1.147 | 0.451 | 0.969 | Imputed   |
| rs143115704 | 10:18433300_T/C                    | 0.040 | 0.034 | 0.907 | 0.705 | 1.168 | 0.451 | 0.982 | Imputed   |
| rs185827760 | 10:18872199_T/C                    | 0.021 | 0.668 | 1.156 | 0.793 | 1.684 | 0.451 | 0.891 | Imputed   |
| rs2255266   | 10:18529720_T/C                    | 0.804 | 0.003 | 0.951 | 0.834 | 1.084 | 0.451 | 0.901 | Imputed   |
| rs113081990 | 10:18511371_ACC/A                  | 0.704 | 0.519 | 1.043 | 0.935 | 1.162 | 0.451 | 1.000 | Imputed   |
| rs76670082  | 10:18511375_T/A                    | 0.704 | 0.519 | 1.043 | 0.935 | 1.162 | 0.451 | 1.000 | Imputed   |
| rs11014125  | 10:18701835_C/G                    | 0.704 | 0.307 | 0.958 | 0.856 | 1.072 | 0.452 | 0.972 | Imputed   |
| rs10828851  | 10:18821185_A/G                    | 0.340 | 0.699 | 1.041 | 0.937 | 1.157 | 0.452 | 0.991 | Imputed   |
| rs1779216   | 10:18511082_C/T                    | 0.704 | 0.519 | 1.043 | 0.935 | 1.162 | 0.453 | 1.000 | Genotyped |
| rs7091833   | 10:18660333_G/A                    | 0.572 | 0.477 | 0.962 | 0.870 | 1.064 | 0.453 | 0.986 | Imputed   |
| rs115118258 | 10:18853252_T/A                    | 0.339 | 0.806 | 1.042 | 0.936 | 1.161 | 0.453 | 0.957 | Imputed   |
| rs113773281 | 10:18450558_CT/CTCTT               | 0.026 | 1.000 | 1.135 | 0.815 | 1.580 | 0.453 | 0.933 | Imputed   |
| rs7905454   | 10:18511947_G/C                    | 0.704 | 0.519 | 1.042 | 0.935 | 1.162 | 0.453 | 1.000 | Imputed   |
| rs7917760   | 10:18511844_C/T                    | 0.704 | 0.519 | 1.042 | 0.935 | 1.162 | 0.453 | 1.000 | Imputed   |
| rs7896607   | 10:18511918_T/G                    | 0.704 | 0.519 | 1.042 | 0.935 | 1.162 | 0.453 | 1.000 | Genotyped |
| rs7087460   | 10:18624893_A/G                    | 0.263 | 0.013 | 0.957 | 0.853 | 1.074 | 0.454 | 0.954 | Imputed   |
| rs10741039  | 10:18659816_C/A                    | 0.573 | 0.477 | 0.962 | 0.870 | 1.064 | 0.454 | 0.989 | Imputed   |
| rs147600044 | 10:18628399_G/A                    | 0.005 | 1.000 | 0.713 | 0.295 | 1.727 | 0.454 | 0.700 | Imputed   |
| rs2482098   | 10:18566389_C/T                    | 0.178 | 0.161 | 0.952 | 0.836 | 1.084 | 0.454 | 0.985 | Imputed   |
| rs115756107 | 10:18855334_T/C                    | 0.339 | 0.806 | 1.042 | 0.935 | 1.161 | 0.454 | 0.953 | Imputed   |
| rs34590981  | 10:18445803_G/GA                   | 0.342 | 0.002 | 0.960 | 0.863 | 1.068 | 0.454 | 0.942 | Imputed   |
| rs139562227 | 10:18858258_T/C                    | 0.339 | 0.779 | 1.042 | 0.935 | 1.161 | 0.455 | 0.948 | Imputed   |
| rs117983502 | 10:18627853_G/C                    | 0.008 | 1.000 | 1.253 | 0.693 | 2.267 | 0.456 | 0.917 | Imputed   |
| rs1277740   | 10:18559240_G/A                    | 0.182 | 0.166 | 0.952 | 0.837 | 1.083 | 0.456 | 0.983 | Imputed   |
| rs7922829   | 10:18817374_T/C                    | 0.339 | 0.598 | 1.041 | 0.937 | 1.157 | 0.456 | 0.992 | Imputed   |
| rs149753924 | 10:18712458_T/A                    | 0.009 | 1.000 | 0.805 | 0.455 | 1.425 | 0.456 | 0.888 | Imputed   |
| rs113540872 | 10:18854833_G/C                    | 0.339 | 0.806 | 1.042 | 0.935 | 1.161 | 0.456 | 0.953 | Imputed   |
| rs1295881   | 10:18566529_G/A                    | 0.178 | 0.161 | 0.952 | 0.836 | 1.084 | 0.457 | 0.986 | Imputed   |
| rs4748454   | 10:18647059_A/G                    | 0.148 | 0.754 | 0.947 | 0.820 | 1.093 | 0.457 | 0.957 | Imputed   |
| rs183418099 | 10:18543823_A/T                    | 0.027 | 1.000 | 1.125 | 0.824 | 1.537 | 0.457 | 0.981 | Imputed   |
| rs76552117  | 10:18532998_A/G                    | 0.101 | 0.088 | 1.070 | 0.895 | 1.278 | 0.457 | 0.862 | Imputed   |
| rs10828771  | 10:18781163_A/G                    | 0.307 | 0.626 | 0.958 | 0.854 | 1.073 | 0.458 | 0.918 | Imputed   |
| rs78300512  | 10:18503140_C/T                    | 0.059 | 0.869 | 0.916 | 0.728 | 1.154 | 0.458 | 0.857 | Imputed   |
| rs2185981   | 10:18559668_C/G                    | 0.182 | 0.184 | 0.952 | 0.837 | 1.084 | 0.458 | 0.983 | Imputed   |
| 10:18726931 | 10:18726931_ATTITTTTTTTTTTTTTTTT/A | 0.552 | 0.000 | 1.041 | 0.936 | 1.158 | 0.459 | 0.890 | Imputed   |
| 10:18923693 | 10:18923693_C/CAACA                | 0.072 | 1.000 | 0.928 | 0.762 | 1.131 | 0.459 | 0.950 | Imputed   |
| rs2497793   | 10:18342172_C/T                    | 0.805 | 0.002 | 0.952 | 0.836 | 1.084 | 0.459 | 0.929 | Imputed   |
| rs78357670  | 10:18605768_G/T                    | 0.118 | 0.030 | 0.940 | 0.799 | 1.107 | 0.459 | 0.887 | Imputed   |
| rs59042995  | 10:18611723_G/A                    | 0.136 | 0.680 | 0.943 | 0.807 | 1.102 | 0.459 | 0.891 | Imputed   |
| rs12569487  | 10:18847584_G/A                    | 0.327 | 0.776 | 1.042 | 0.934 | 1.162 | 0.460 | 0.957 | Imputed   |
| rs12570792  | 10:18847594_A/C                    | 0.327 | 0.776 | 1.042 | 0.934 | 1.162 | 0.460 | 0.957 | Imputed   |
| rs139710192 | 10:18854695_C/T                    | 0.339 | 0.806 | 1.042 | 0.935 | 1.160 | 0.460 | 0.953 | Imputed   |
| rs4748441   | 10:18393490_C/A                    | 0.015 | 0.335 | 1.221 | 0.719 | 2.074 | 0.460 | 0.606 | Imputed   |
| rs60859849  | 10:18614864_T/G                    | 0.142 | 1.000 | 0.944 | 0.811 | 1.100 | 0.460 | 0.891 | Imputed   |
| rs1779230   | 10:18527867_A/G                    | 0.161 | 0.000 | 0.947 | 0.821 | 1.094 | 0.461 | 0.869 | Imputed   |
| rs12775151  | 10:18374249_T/C                    | 0.529 | 0.128 | 1.040 | 0.937 | 1.153 | 0.461 | 0.925 | Imputed   |
| rs146562610 | 10:18853702_TTCCATTC/T             | 0.339 | 0.916 | 1.041 | 0.935 | 1.160 | 0.461 | 0.951 | Imputed   |
| rs10828975  | 10:18886261_T/C                    | 0.335 | 0.323 | 1.042 | 0.934 | 1.163 | 0.461 | 0.928 | Imputed   |
| rs187402804 | 10:18437161_C/T                    | 0.001 | 1.000 | 1.821 | 0.370 | 8.962 | 0.461 | 0.694 | Imputed   |
| rs2489199   | 10:18525290_A/G                    | 0.821 | 0.016 | 0.952 | 0.834 | 1.086 | 0.461 | 0.942 | Imputed   |
| rs12570793  | 10:18847629_A/T                    | 0.323 | 0.721 | 1.042 | 0.934 | 1.163 | 0.462 | 0.945 | Imputed   |
| rs2497818   | 10:18367338_A/G                    | 0.133 | 1.000 | 0.944 | 0.810 | 1.101 | 0.462 | 0.932 | Imputed   |
| rs10400076  | 10:18802698_T/A                    | 0.339 | 0.574 | 1.041 | 0.936 | 1.158 | 0.462 | 0.976 | Imputed   |
| rs12570794  | 10:18847643_A/T                    | 0.323 | 0.721 | 1.042 | 0.933 | 1.163 | 0.463 | 0.945 | Imputed   |
| rs12571081  | 10:18847640_T/G                    | 0.323 | 0.721 | 1.042 | 0.933 | 1.163 | 0.463 | 0.945 | Imputed   |
| rs149375927 | 10:18859548_T/C                    | 0.064 | 0.795 | 0.924 | 0.748 | 1.141 | 0.464 | 0.929 | Imputed   |
| rs140972630 | 10:18859550_C/G                    | 0.064 | 0.795 | 0.924 | 0.748 | 1.141 | 0.464 | 0.929 | Imputed   |
| rs7072277   | 10:18658707_A/G                    | 0.575 | 0.418 | 0.963 | 0.870 | 1.065 | 0.464 | 0.989 | Imputed   |
| rs186902993 | 10:18660771_C/T                    | 0.119 | 0.603 | 0.944 | 0.808 | 1.102 | 0.464 | 0.974 | Imputed   |
| 10:18920993 | 10:18920993_T/C                    | 0.072 | 1.000 | 0.929 | 0.762 | 1.132 | 0.464 | 0.950 | Imputed   |
| rs7072399   | 10:18658791_A/G                    | 0.574 | 0.418 | 0.963 | 0.871 | 1.065 | 0.464 | 0.989 | Imputed   |
| rs11015185  | 10:18909573_C/T                    | 0.073 | 1.000 | 0.929 | 0.763 | 1.131 | 0.465 | 0.954 | Imputed   |
| 10:18919152 | 10:18919152_C/A                    | 0.072 | 1.000 | 0.929 | 0.763 | 1.132 | 0.465 | 0.950 | Imputed   |
| rs144009622 | 10:18461061_G/T                    | 0.040 | 0.034 | 0.910 | 0.708 | 1.171 | 0.465 | 0.985 | Imputed   |
| rs12771084  | 10:18791538_C/T                    | 0.520 | 0.006 | 1.040 | 0.937 | 1.153 | 0.465 | 0.929 | Imputed   |
| rs72022056  | 10:18908633_TA/T                   | 0.073 | 1.000 | 0.929 | 0.763 | 1.132 | 0.466 | 0.953 | Imputed   |
| rs4748484   | 10:18829261_T/A                    | 0.318 | 0.002 | 1.042 | 0.933 | 1.164 | 0.466 | 0.920 | Imputed   |
| rs148003563 | 10:18636520_A/AT                   | 0.005 | 1.000 | 0.724 | 0.303 | 1.727 | 0.466 | 0.716 | Imputed   |
| rs147776562 | 10:18907869_AT/A                   | 0.073 | 1.000 | 0.929 | 0.763 | 1.132 | 0.466 | 0.954 | Imputed   |
| rs201433717 | 10:18606161_C/CT                   | 0.023 | 0.370 | 0.866 | 0.589 | 1.274 | 0.466 | 0.747 | Imputed   |
| rs12356125  | 10:18907927_C/T                    | 0.072 | 1.000 | 0.929 | 0.763 | 1.132 | 0.466 | 0.955 | Imputed   |
| rs4748485   | 10:18829262_A/T                    | 0.318 | 0.002 | 1.042 | 0.933 | 1.164 | 0.466 | 0.920 | Imputed   |
| rs12357491  | 10:18913866_G/C                    | 0.072 | 1.000 | 0.929 | 0.763 | 1.132 | 0.466 | 0.953 | Imputed   |
| rs60721377  | 10:18411649_C/G                    | 0.050 | 0.058 | 0.916 | 0.724 | 1.159 | 0.467 | 0.931 | Imputed   |

## SUPPLEMENTARY DATA

|             |                     |       |       |       |       |        |       |       |         |
|-------------|---------------------|-------|-------|-------|-------|--------|-------|-------|---------|
| rs183900931 | 10:18725172_G/A     | 0.014 | 0.492 | 1.182 | 0.754 | 1.853  | 0.467 | 0.886 | Imputed |
| rs112701401 | 10:18644811_C/G     | 0.026 | 1.000 | 0.878 | 0.617 | 1.248  | 0.467 | 0.782 | Imputed |
| rs12356280  | 10:18906085_T/C     | 0.073 | 1.000 | 0.930 | 0.764 | 1.132  | 0.467 | 0.956 | Imputed |
| rs75503774  | 10:18528881_A/G     | 0.102 | 0.076 | 1.068 | 0.895 | 1.275  | 0.467 | 0.873 | Imputed |
| rs59473151  | 10:18611964_C/T     | 0.135 | 0.889 | 0.944 | 0.807 | 1.103  | 0.467 | 0.887 | Imputed |
| rs75152088  | 10:18636762_G/A     | 0.005 | 1.000 | 0.725 | 0.304 | 1.728  | 0.467 | 0.715 | Imputed |
| rs2497820   | 10:18368849_G/A     | 0.715 | 0.697 | 0.958 | 0.855 | 1.075  | 0.468 | 0.928 | Imputed |
| rs16916914  | 10:18457722_T/C     | 0.040 | 0.034 | 0.911 | 0.708 | 1.172  | 0.468 | 0.987 | Imputed |
| rs2489218   | 10:18557946_T/C     | 0.182 | 0.184 | 0.953 | 0.838 | 1.085  | 0.468 | 0.980 | Imputed |
| rs45452100  | 10:18905039_T/C     | 0.073 | 1.000 | 0.930 | 0.764 | 1.132  | 0.468 | 0.956 | Imputed |
| rs182001467 | 10:18527483_G/A     | 0.005 | 1.000 | 1.372 | 0.584 | 3.224  | 0.468 | 0.670 | Imputed |
| rs12356286  | 10:18911412_G/A     | 0.073 | 1.000 | 0.930 | 0.763 | 1.132  | 0.468 | 0.952 | Imputed |
| rs17622211  | 10:18904638_C/T     | 0.073 | 1.000 | 0.930 | 0.764 | 1.132  | 0.468 | 0.955 | Imputed |
| rs11015180  | 10:18908257_C/T     | 0.073 | 1.000 | 0.930 | 0.764 | 1.132  | 0.469 | 0.954 | Imputed |
| rs72271975  | 10:18475348_G/GA    | 0.071 | 0.308 | 0.928 | 0.757 | 1.137  | 0.470 | 0.910 | Imputed |
| rs2488138   | 10:18337471_A/T     | 0.772 | 0.104 | 0.957 | 0.850 | 1.078  | 0.470 | 0.985 | Imputed |
| rs7088091   | 10:18804094_T/C     | 0.339 | 0.598 | 1.040 | 0.935 | 1.156  | 0.470 | 0.982 | Imputed |
| rs11596678  | 10:18788321_C/T     | 0.004 | 1.000 | 1.428 | 0.543 | 3.752  | 0.470 | 0.741 | Imputed |
| rs2489217   | 10:18558088_T/C     | 0.182 | 0.184 | 0.953 | 0.838 | 1.085  | 0.470 | 0.980 | Imputed |
| rs76002207  | 10:18676060_C/T     | 0.002 | 1.000 | 0.569 | 0.123 | 2.636  | 0.471 | 0.668 | Imputed |
| rs2488157   | 10:18368908_T/C     | 0.115 | 0.937 | 0.942 | 0.801 | 1.108  | 0.471 | 0.948 | Imputed |
| rs12254226  | 10:18409647_C/T     | 0.154 | 0.098 | 1.053 | 0.915 | 1.211  | 0.471 | 0.962 | Imputed |
| rs12240995  | 10:18637232_A/C     | 0.123 | 0.288 | 0.944 | 0.807 | 1.104  | 0.471 | 0.930 | Imputed |
| rs112361257 | 10:18637763_C/T     | 0.005 | 1.000 | 0.727 | 0.306 | 1.730  | 0.471 | 0.719 | Imputed |
| rs189355286 | 10:18390478_A/G     | 0.001 | 1.000 | 1.872 | 0.339 | 10.326 | 0.472 | 0.662 | Imputed |
| rs111934395 | 10:18638267_T/G     | 0.005 | 1.000 | 0.728 | 0.306 | 1.730  | 0.472 | 0.721 | Imputed |
| rs2272274   | 10:18826974_T/C     | 0.342 | 0.700 | 1.040 | 0.935 | 1.155  | 0.472 | 0.988 | Imputed |
| rs11015104  | 10:18893908_G/A     | 0.073 | 1.000 | 0.931 | 0.765 | 1.132  | 0.472 | 0.957 | Imputed |
| rs11015100  | 10:18893687_T/C     | 0.073 | 1.000 | 0.931 | 0.765 | 1.132  | 0.472 | 0.957 | Imputed |
| rs113426282 | 10:18893740_A/G     | 0.073 | 1.000 | 0.931 | 0.765 | 1.132  | 0.473 | 0.957 | Imputed |
| rs74222044  | 10:18844014_T/C     | 0.334 | 0.832 | 1.040 | 0.934 | 1.158  | 0.473 | 0.977 | Imputed |
| rs2497819   | 10:18367847_A/C     | 0.115 | 0.937 | 0.942 | 0.801 | 1.108  | 0.473 | 0.949 | Imputed |
| rs12569760  | 10:18847720_G/A     | 0.517 | 0.849 | 1.038 | 0.938 | 1.148  | 0.473 | 0.979 | Imputed |
| rs4466722   | 10:18889399_A/G     | 0.073 | 1.000 | 0.931 | 0.765 | 1.132  | 0.473 | 0.958 | Imputed |
| rs11015065  | 10:18888369_T/C     | 0.073 | 1.000 | 0.931 | 0.765 | 1.132  | 0.473 | 0.960 | Imputed |
| rs11015066  | 10:18888475_C/T     | 0.073 | 1.000 | 0.931 | 0.765 | 1.132  | 0.473 | 0.960 | Imputed |
| rs11015089  | 10:18891093_C/T     | 0.073 | 1.000 | 0.931 | 0.765 | 1.132  | 0.473 | 0.959 | Imputed |
| rs11015046  | 10:18885467_C/T     | 0.073 | 1.000 | 0.931 | 0.765 | 1.132  | 0.473 | 0.959 | Imputed |
| rs11015060  | 10:18887705_T/C     | 0.073 | 1.000 | 0.931 | 0.765 | 1.132  | 0.474 | 0.958 | Imputed |
| rs11015091  | 10:18892056_T/C     | 0.073 | 1.000 | 0.931 | 0.765 | 1.133  | 0.474 | 0.959 | Imputed |
| rs113131069 | 10:18879944_G/A     | 0.073 | 1.000 | 0.931 | 0.765 | 1.132  | 0.474 | 0.960 | Imputed |
| rs139386514 | 10:18758140_G/T     | 0.047 | 0.027 | 0.908 | 0.697 | 1.182  | 0.474 | 0.789 | Imputed |
| rs10828973  | 10:18884814_T/C     | 0.073 | 1.000 | 0.931 | 0.765 | 1.132  | 0.474 | 0.961 | Imputed |
| rs11492557  | 10:18880785_A/G     | 0.073 | 1.000 | 0.931 | 0.765 | 1.132  | 0.474 | 0.961 | Imputed |
| rs11015033  | 10:18882195_A/G     | 0.073 | 1.000 | 0.931 | 0.765 | 1.132  | 0.474 | 0.961 | Imputed |
| rs10828542  | 10:18627285_A/G     | 0.415 | 0.067 | 0.963 | 0.867 | 1.069  | 0.474 | 0.933 | Imputed |
| rs11511205  | 10:18879449_A/G     | 0.073 | 1.000 | 0.931 | 0.765 | 1.132  | 0.474 | 0.962 | Imputed |
| rs182604618 | 10:18859486_T/C     | 0.073 | 1.000 | 0.931 | 0.766 | 1.132  | 0.474 | 0.964 | Imputed |
| rs12355452  | 10:18871450_C/G     | 0.073 | 1.000 | 0.931 | 0.766 | 1.132  | 0.475 | 0.964 | Imputed |
| rs12765362  | 10:18842595_G/C     | 0.517 | 0.849 | 1.037 | 0.938 | 1.147  | 0.475 | 0.986 | Imputed |
| rs10718176  | 10:18367407_CA/C    | 0.343 | 0.001 | 1.041 | 0.932 | 1.163  | 0.475 | 0.878 | Imputed |
| rs1969897   | 10:18608470_T/C     | 0.419 | 0.051 | 1.041 | 0.933 | 1.160  | 0.475 | 0.873 | Imputed |
| rs11015034  | 10:18882208_C/T     | 0.073 | 1.000 | 0.931 | 0.765 | 1.133  | 0.475 | 0.961 | Imputed |
| rs75036238  | 10:18331317_A/G     | 0.083 | 0.821 | 1.073 | 0.884 | 1.302  | 0.475 | 0.884 | Imputed |
| rs4497294   | 10:18889275_C/T     | 0.073 | 1.000 | 0.931 | 0.765 | 1.133  | 0.475 | 0.954 | Imputed |
| rs1888692   | 10:18453209_A/G     | 0.028 | 0.770 | 1.118 | 0.823 | 1.520  | 0.475 | 0.992 | Imputed |
| rs115230714 | 10:18855247_T/G     | 0.333 | 0.832 | 1.040 | 0.933 | 1.160  | 0.475 | 0.950 | Imputed |
| rs148087583 | 10:18737895_C/T     | 0.016 | 0.306 | 1.152 | 0.781 | 1.701  | 0.475 | 0.980 | Imputed |
| rs11015020  | 10:18876987_G/C     | 0.073 | 1.000 | 0.931 | 0.766 | 1.133  | 0.476 | 0.961 | Imputed |
| rs113117863 | 10:18764840_G/A     | 0.002 | 1.000 | 0.664 | 0.215 | 2.046  | 0.476 | 0.864 | Imputed |
| rs11015022  | 10:18878252_G/A     | 0.073 | 1.000 | 0.931 | 0.766 | 1.133  | 0.476 | 0.960 | Imputed |
| rs141690861 | 10:18875708_C/CAGCT | 0.073 | 1.000 | 0.931 | 0.766 | 1.133  | 0.476 | 0.963 | Imputed |
| rs112978115 | 10:18875602_A/G     | 0.073 | 1.000 | 0.931 | 0.766 | 1.133  | 0.476 | 0.963 | Imputed |
| rs1012227   | 10:18681166_C/G     | 0.283 | 0.877 | 1.042 | 0.930 | 1.167  | 0.476 | 0.964 | Imputed |
| rs12360345  | 10:18871449_G/A     | 0.073 | 1.000 | 0.931 | 0.766 | 1.132  | 0.476 | 0.964 | Imputed |
| rs4748459   | 10:18685031_A/G     | 0.616 | 0.524 | 1.039 | 0.936 | 1.153  | 0.476 | 0.989 | Imputed |
| rs2488139   | 10:18338571_A/G     | 0.772 | 0.104 | 0.958 | 0.850 | 1.079  | 0.476 | 0.985 | Imputed |
| rs74868477  | 10:18874206_A/G     | 0.073 | 1.000 | 0.931 | 0.766 | 1.133  | 0.476 | 0.964 | Imputed |
| rs111680375 | 10:18874639_G/A     | 0.073 | 1.000 | 0.931 | 0.766 | 1.133  | 0.477 | 0.963 | Imputed |
| rs11015001  | 10:18873663_C/A     | 0.073 | 1.000 | 0.931 | 0.766 | 1.133  | 0.477 | 0.962 | Imputed |
| rs1277743   | 10:18558523_C/T     | 0.182 | 0.184 | 0.954 | 0.838 | 1.086  | 0.477 | 0.981 | Imputed |
| rs4570480   | 10:18868844_A/G     | 0.073 | 1.000 | 0.932 | 0.766 | 1.132  | 0.477 | 0.965 | Imputed |
| rs111563590 | 10:18868171_G/A     | 0.073 | 1.000 | 0.932 | 0.766 | 1.132  | 0.477 | 0.966 | Imputed |
| rs2497822   | 10:18369970_A/G     | 0.131 | 1.000 | 0.946 | 0.811 | 1.103  | 0.477 | 0.942 | Imputed |
| rs1813517   | 10:18508459_G/C     | 0.548 | 0.000 | 1.038 | 0.937 | 1.150  | 0.477 | 0.928 | Imputed |
| rs11014985  | 10:18869172_T/C     | 0.073 | 1.000 | 0.932 | 0.766 | 1.132  | 0.477 | 0.965 | Imputed |
| rs80255463  | 10:18518070_T/A     | 0.103 | 0.392 | 1.063 | 0.898 | 1.260  | 0.477 | 0.960 | Imputed |
| rs79825106  | 10:18434912_C/G     | 0.029 | 1.000 | 1.118 | 0.822 | 1.522  | 0.477 | 0.956 | Imputed |
| rs189492199 | 10:18708525_G/A     | 0.012 | 0.056 | 1.195 | 0.730 | 1.956  | 0.478 | 0.849 | Imputed |
| rs111797840 | 10:18864597_A/G     | 0.073 | 1.000 | 0.932 | 0.767 | 1.132  | 0.478 | 0.967 | Imputed |
| rs72780098  | 10:18404352_G/T     | 0.044 | 0.151 | 1.098 | 0.848 | 1.423  | 0.478 | 0.863 | Imputed |
| rs7085332   | 10:18791922_A/T     | 0.520 | 0.011 | 1.038 | 0.936 | 1.152  | 0.478 | 0.931 | Imputed |
| rs11014961  | 10:18863199_C/A     | 0.073 | 1.000 | 0.932 | 0.767 | 1.132  | 0.478 | 0.965 | Imputed |
| rs7098844   | 10:18759348_C/T     | 0.956 | 0.256 | 1.092 | 0.856 | 1.392  | 0.478 | 0.978 | Imputed |
| rs75531151  | 10:18862549_C/T     | 0.073 | 1.000 | 0.932 | 0.767 | 1.133  | 0.479 | 0.968 | Imputed |
| rs2488159   | 10:18370991_G/A     | 0.131 | 1.000 | 0.946 | 0.811 | 1.103  | 0.479 | 0.942 | Imputed |
| rs117858438 | 10:18861457_C/T     | 0.073 | 1.000 | 0.932 | 0.767 | 1.133  | 0.480 | 0.969 | Imputed |
| rs116963278 | 10:18857853_C/G     | 0.073 | 1.000 | 0.932 | 0.768 | 1.133  | 0.480 | 0.971 | Imputed |
| rs117646637 | 10:18856993_C/T     | 0.073 | 1.000 | 0.932 | 0.768 | 1.132  | 0.481 | 0.971 | Imputed |
| rs117438689 | 10:18857003_C/A     | 0.073 | 1.000 | 0.932 | 0.768 | 1.132  | 0.481 | 0.971 | Imputed |
| rs11014733  | 10:18827829_G/A     | 0.074 | 0.909 | 0.933 | 0.771 | 1.130  | 0.481 | 0.989 | Imputed |
| rs117956847 | 10:18856135_T/G     | 0.073 | 0.909 | 0.933 | 0.768 | 1.132  | 0.481 | 0.972 | Imputed |

## SUPPLEMENTARY DATA

|             |                                                |       |       |       |       |       |       |       |           |
|-------------|------------------------------------------------|-------|-------|-------|-------|-------|-------|-------|-----------|
| 10:18855471 | 10:18855471_ATCCATTCATTC/A                     | 0.073 | 0.909 | 0.933 | 0.768 | 1.132 | 0.481 | 0.973 | Imputed   |
| rs202174676 | 10:18390657_GT/G                               | 0.056 | 0.601 | 0.917 | 0.722 | 1.166 | 0.482 | 0.809 | Imputed   |
| rs60196964  | 10:18513221_G/A                                | 0.032 | 1.000 | 1.110 | 0.830 | 1.484 | 0.482 | 0.946 | Imputed   |
| rs192260180 | 10:18774982_T/C                                | 0.023 | 0.742 | 0.880 | 0.616 | 1.257 | 0.482 | 0.850 | Imputed   |
| 10:18852784 | 10:18852784_CTTCCATTCATA/C                     | 0.073 | 0.909 | 0.933 | 0.768 | 1.132 | 0.482 | 0.975 | Imputed   |
| rs111939849 | 10:18746088_T/C                                | 0.003 | 1.000 | 0.678 | 0.230 | 2.002 | 0.482 | 0.788 | Imputed   |
| rs7907638   | 10:18407869_A/T                                | 0.877 | 0.000 | 0.938 | 0.785 | 1.121 | 0.483 | 0.698 | Imputed   |
| rs74790927  | 10:18452427_C/T                                | 0.028 | 0.770 | 1.116 | 0.821 | 1.517 | 0.483 | 0.993 | Imputed   |
| rs12257502  | 10:18755081_T/C                                | 0.042 | 0.693 | 0.914 | 0.711 | 1.175 | 0.483 | 0.954 | Imputed   |
| rs76154333  | 10:18406437_C/T                                | 0.037 | 0.818 | 0.908 | 0.692 | 1.190 | 0.484 | 0.958 | Imputed   |
| rs74602025  | 10:18485708_T/C                                | 0.032 | 0.549 | 0.897 | 0.661 | 1.217 | 0.484 | 0.864 | Imputed   |
| rs17622004  | 10:18899798_G/A                                | 0.073 | 1.000 | 0.932 | 0.766 | 1.135 | 0.485 | 0.957 | Imputed   |
| rs7080623   | 10:18722363_C/T                                | 0.230 | 0.653 | 1.044 | 0.925 | 1.178 | 0.485 | 0.969 | Imputed   |
| rs77286225  | 10:18485993_T/C                                | 0.032 | 0.549 | 0.897 | 0.661 | 1.217 | 0.485 | 0.864 | Imputed   |
| rs184130451 | 10:18890243_T/C                                | 0.002 | 1.000 | 1.618 | 0.419 | 6.254 | 0.485 | 0.909 | Imputed   |
|             | 10:18847250_CAGAATGGAATGGAATGAGG<br>AATGGGAT/C | 0.074 | 0.909 | 0.934 | 0.770 | 1.132 | 0.485 | 0.980 | Imputed   |
| 10:18847250 | 10:18509154_A/G                                | 0.003 | 1.000 | 1.425 | 0.526 | 3.861 | 0.486 | 0.696 | Imputed   |
| rs11516859  | 10:18865212_G/A                                | 0.073 | 1.000 | 0.933 | 0.767 | 1.134 | 0.486 | 0.965 | Imputed   |
| rs74756266  | 10:18521001_T/C                                | 0.050 | 0.737 | 0.920 | 0.729 | 1.162 | 0.486 | 0.948 | Imputed   |
| rs118102228 | 10:18845710_T/A                                | 0.074 | 0.909 | 0.934 | 0.770 | 1.132 | 0.486 | 0.982 | Imputed   |
| rs117171246 | 10:18845516_G/A                                | 0.074 | 0.909 | 0.934 | 0.770 | 1.132 | 0.486 | 0.982 | Imputed   |
| rs150026807 | 10:18845496_T/A                                | 0.074 | 0.909 | 0.934 | 0.770 | 1.132 | 0.486 | 0.982 | Imputed   |
| rs12257556  | 10:18790503_G/A                                | 0.520 | 0.004 | 1.038 | 0.935 | 1.152 | 0.487 | 0.926 | Imputed   |
| rs1277731   | 10:18563985_G/A                                | 0.182 | 0.166 | 0.955 | 0.840 | 1.087 | 0.487 | 0.986 | Imputed   |
| rs117022702 | 10:18843638_G/T                                | 0.074 | 0.909 | 0.934 | 0.770 | 1.132 | 0.487 | 0.984 | Imputed   |
| rs2489200   | 10:18510497_C/A                                | 0.705 | 0.425 | 1.039 | 0.932 | 1.159 | 0.487 | 0.993 | Imputed   |
| rs71497239  | 10:18511643_A/T                                | 0.614 | 0.571 | 1.037 | 0.936 | 1.149 | 0.487 | 0.995 | Imputed   |
| rs12776325  | 10:18791529_G/A                                | 0.504 | 0.023 | 1.038 | 0.935 | 1.152 | 0.487 | 0.924 | Imputed   |
| rs78064807  | 10:18649431_G/T                                | 0.008 | 1.000 | 1.237 | 0.679 | 2.253 | 0.487 | 0.904 | Imputed   |
| rs72782024  | 10:18511631_C/T                                | 0.614 | 0.571 | 1.037 | 0.936 | 1.149 | 0.488 | 0.995 | Imputed   |
| rs113948011 | 10:18742627_C/T                                | 0.003 | 1.000 | 0.683 | 0.233 | 2.005 | 0.488 | 0.798 | Imputed   |
| rs7911193   | 10:18661482_T/C                                | 0.603 | 0.322 | 0.964 | 0.871 | 1.068 | 0.488 | 0.984 | Imputed   |
| rs142983126 | 10:18608335_A/G                                | 0.005 | 1.000 | 0.722 | 0.288 | 1.812 | 0.488 | 0.615 | Imputed   |
| rs11014831  | 10:18840510_T/C                                | 0.074 | 0.909 | 0.934 | 0.771 | 1.132 | 0.488 | 0.987 | Imputed   |
| rs10458703  | 10:18630884_G/A                                | 0.173 | 0.027 | 0.955 | 0.838 | 1.088 | 0.488 | 1.000 | Genotyped |
| rs1929423   | 10:18445684_G/A                                | 0.040 | 0.034 | 0.915 | 0.711 | 1.177 | 0.489 | 0.990 | Imputed   |
| rs11014825  | 10:18839902_G/A                                | 0.074 | 0.909 | 0.934 | 0.771 | 1.132 | 0.489 | 0.987 | Imputed   |
| rs148223772 | 10:18433342_T/A                                | 0.013 | 0.122 | 1.173 | 0.747 | 1.841 | 0.489 | 0.949 | Imputed   |
| rs141548912 | 10:18470647_G/A                                | 0.005 | 1.000 | 0.755 | 0.341 | 1.673 | 0.489 | 0.824 | Imputed   |
| rs11014805  | 10:18838266_G/A                                | 0.074 | 0.909 | 0.935 | 0.771 | 1.132 | 0.490 | 0.989 | Imputed   |
| rs11014800  | 10:18838046_G/A                                | 0.074 | 0.909 | 0.935 | 0.771 | 1.132 | 0.490 | 0.989 | Imputed   |
| rs11014797  | 10:18837677_T/C                                | 0.074 | 0.909 | 0.935 | 0.771 | 1.132 | 0.490 | 0.989 | Imputed   |
| rs77757904  | 10:18837537_T/A                                | 0.074 | 0.909 | 0.935 | 0.771 | 1.132 | 0.490 | 0.989 | Imputed   |
| rs2488156   | 10:18361395_C/T                                | 0.114 | 0.813 | 0.945 | 0.804 | 1.111 | 0.491 | 0.961 | Imputed   |
| rs150041732 | 10:18434889_T/C                                | 0.044 | 0.147 | 1.095 | 0.846 | 1.417 | 0.491 | 0.867 | Imputed   |
| 10:18721764 | 10:18721764_AAAACAAAC/A                        | 0.229 | 0.653 | 1.043 | 0.925 | 1.178 | 0.491 | 0.969 | Imputed   |
| 10:18721764 | 10:18721764_AAAACAAAC/A                        | 0.229 | 0.653 | 1.043 | 0.925 | 1.178 | 0.491 | 0.969 | Imputed   |
| rs138130692 | 10:18721764_AAAACAAAC/A                        | 0.229 | 0.653 | 1.043 | 0.925 | 1.178 | 0.491 | 0.969 | Imputed   |
| rs142882187 | 10:18721764_AAAACAAAC/A                        | 0.229 | 0.653 | 1.043 | 0.925 | 1.178 | 0.491 | 0.969 | Imputed   |
| rs2482106   | 10:18558130_A/C                                | 0.183 | 0.184 | 0.956 | 0.840 | 1.087 | 0.491 | 0.979 | Imputed   |
| rs111346321 | 10:18651762_G/A                                | 0.120 | 0.461 | 0.947 | 0.811 | 1.106 | 0.491 | 0.966 | Imputed   |
| rs2488137   | 10:18336330_G/T                                | 0.161 | 0.032 | 1.051 | 0.912 | 1.211 | 0.491 | 0.908 | Imputed   |
|             | 10:18477431_ACTGTGTTGCCAGGCTGCT/<br>A          | 0.040 | 0.034 | 0.914 | 0.707 | 1.182 | 0.491 | 0.951 | Imputed   |
| rs370062700 | 10:18790980_G/A                                | 0.504 | 0.015 | 1.037 | 0.934 | 1.152 | 0.492 | 0.922 | Imputed   |
| rs4748475   | 10:18432587_G/C                                | 0.013 | 0.445 | 1.171 | 0.746 | 1.839 | 0.492 | 0.950 | Imputed   |
| rs76236127  | 10:18626839_C/T                                | 0.008 | 1.000 | 1.226 | 0.685 | 2.197 | 0.493 | 0.895 | Imputed   |
| rs78725566  | 10:18627432_A/C                                | 0.008 | 1.000 | 1.226 | 0.685 | 2.197 | 0.493 | 0.895 | Imputed   |
| rs139670140 | 10:18496985_T/C                                | 0.021 | 0.363 | 0.878 | 0.604 | 1.275 | 0.493 | 0.851 | Imputed   |
| rs11013005  | 10:18859853_A/T                                | 0.251 | 0.525 | 0.959 | 0.852 | 1.080 | 0.493 | 0.934 | Imputed   |
| rs116400544 | 10:18864958_G/A                                | 0.251 | 0.498 | 0.959 | 0.851 | 1.081 | 0.494 | 0.928 | Imputed   |
| rs11511084  | 10:18431918_T/A                                | 0.013 | 0.445 | 1.170 | 0.745 | 1.838 | 0.494 | 0.950 | Imputed   |
| rs11058558  | 10:18388434_A/C                                | 0.055 | 0.853 | 0.917 | 0.714 | 1.177 | 0.494 | 0.765 | Imputed   |
| rs11013851  | 10:18652913_G/A                                | 0.148 | 1.000 | 0.951 | 0.825 | 1.098 | 0.495 | 0.964 | Imputed   |
| rs11456355  | 10:18781549_C/C/A                              | 0.363 | 0.010 | 0.961 | 0.858 | 1.077 | 0.495 | 0.861 | Imputed   |
| rs11014398  | 10:18761153_T/C                                | 0.486 | 0.062 | 1.036 | 0.937 | 1.145 | 0.495 | 0.976 | Imputed   |
| rs74551659  | 10:18514791_G/C                                | 0.050 | 0.618 | 0.922 | 0.730 | 1.164 | 0.496 | 0.953 | Imputed   |
| rs117049839 | 10:18631861_C/T                                | 0.008 | 1.000 | 1.225 | 0.683 | 2.196 | 0.496 | 0.895 | Imputed   |
| rs11014721  | 10:18823721_G/C                                | 0.075 | 0.909 | 0.936 | 0.773 | 1.133 | 0.496 | 0.986 | Imputed   |
| rs11013438  | 10:18590865_C/A                                | 0.133 | 0.939 | 0.944 | 0.800 | 1.115 | 0.496 | 0.808 | Imputed   |
| rs76719841  | 10:18380347_T/C                                | 0.039 | 0.005 | 0.908 | 0.688 | 1.199 | 0.496 | 0.842 | Imputed   |
| rs10828779  | 10:18787821_A/T                                | 0.760 | 0.222 | 0.959 | 0.848 | 1.083 | 0.496 | 0.918 | Imputed   |
| rs78575987  | 10:18518219_T/C                                | 0.050 | 0.737 | 0.922 | 0.731 | 1.164 | 0.497 | 0.953 | Imputed   |
| rs139399047 | 10:18517764_G/C                                | 0.050 | 0.737 | 0.922 | 0.731 | 1.164 | 0.497 | 0.953 | Imputed   |
| rs4628581   | 10:18799890_A/C                                | 0.478 | 0.899 | 1.036 | 0.935 | 1.148 | 0.497 | 0.963 | Imputed   |
| rs139467294 | 10:18517359_C/T                                | 0.050 | 0.737 | 0.922 | 0.731 | 1.164 | 0.497 | 0.953 | Imputed   |
| rs2488135   | 10:18333144_T/C                                | 0.773 | 0.174 | 0.960 | 0.852 | 1.081 | 0.497 | 0.986 | Imputed   |
| rs11012691  | 10:18391562_C/A                                | 0.053 | 0.600 | 0.920 | 0.724 | 1.170 | 0.497 | 0.849 | Imputed   |
| rs4748474   | 10:18790727_G/A                                | 0.520 | 0.007 | 1.037 | 0.934 | 1.151 | 0.498 | 0.927 | Imputed   |
| rs10829017  | 10:18904057_T/C                                | 0.568 | 0.333 | 1.038 | 0.932 | 1.155 | 0.498 | 0.894 | Imputed   |
| rs10634231  | 10:18531039_C/CAT                              | 0.812 | 0.003 | 0.955 | 0.837 | 1.090 | 0.498 | 0.902 | Imputed   |
| rs11013910  | 10:18663370_G/A                                | 0.121 | 0.609 | 0.948 | 0.814 | 1.106 | 0.498 | 0.977 | Imputed   |
| rs11014990  | 10:18870101_C/T                                | 0.074 | 1.000 | 0.935 | 0.769 | 1.137 | 0.499 | 0.953 | Imputed   |
| rs148708224 | 10:18914110_G/A                                | 0.002 | 1.000 | 1.604 | 0.408 | 6.308 | 0.499 | 0.722 | Imputed   |
|             | 10:18826645_G/GCACTGAACCAAGATCAC<br>C          | 0.074 | 0.909 | 0.936 | 0.773 | 1.134 | 0.499 | 0.992 | Imputed   |
| 10:18826645 | 10:18385475_A/T                                | 0.021 | 0.001 | 1.134 | 0.787 | 1.633 | 0.499 | 0.872 | Imputed   |
| rs149596687 | 10:18711712_C/G                                | 0.274 | 0.009 | 0.963 | 0.863 | 1.075 | 0.499 | 0.997 | Imputed   |
| rs7091067   | 10:18503001_T/G                                | 0.052 | 0.472 | 0.920 | 0.722 | 1.172 | 0.499 | 0.870 | Imputed   |
| rs73595546  | 10:18429981_C/G                                | 0.013 | 0.445 | 1.168 | 0.744 | 1.835 | 0.500 | 0.952 | Imputed   |
| rs117750299 | 10:18449304_T/C                                | 0.028 | 0.770 | 1.111 | 0.818 | 1.509 | 0.500 | 0.995 | Imputed   |

# SUPPLEMENTARY DATA

|             |                                   |       |       |       |       |       |       |       |           |
|-------------|-----------------------------------|-------|-------|-------|-------|-------|-------|-------|-----------|
| rs57344400  | 10:18910943_CATAT/C               | 0.803 | 0.074 | 1.046 | 0.918 | 1.193 | 0.500 | 0.920 | Imputed   |
| rs10828534  | 10:18625524_G/A                   | 0.266 | 0.013 | 0.961 | 0.857 | 1.078 | 0.500 | 0.955 | Imputed   |
| rs78753395  | 10:18477905_T/G                   | 0.003 | 1.000 | 0.687 | 0.230 | 2.046 | 0.500 | 0.816 | Imputed   |
| rs2488136   | 10:18334521_A/G                   | 0.773 | 0.160 | 0.960 | 0.852 | 1.081 | 0.500 | 0.985 | Imputed   |
| rs141118240 | 10:18481651_T/C                   | 0.005 | 1.000 | 0.762 | 0.346 | 1.679 | 0.500 | 0.827 | Imputed   |
| rs2357928   | 10:18549641_G/A                   | 0.564 | 0.148 | 1.035 | 0.936 | 1.145 | 0.500 | 0.980 | Imputed   |
| rs138094231 | 10:18429624_C/A                   | 0.040 | 0.034 | 0.917 | 0.711 | 1.181 | 0.500 | 0.978 | Imputed   |
| rs150269815 | 10:18481682_T/C                   | 0.005 | 1.000 | 0.762 | 0.346 | 1.680 | 0.500 | 0.827 | Imputed   |
| rs1891392   | 10:18336421_T/C                   | 0.773 | 0.113 | 0.960 | 0.852 | 1.081 | 0.500 | 0.984 | Imputed   |
| rs201305631 | 10:18449232_A/AT                  | 0.028 | 0.770 | 1.111 | 0.818 | 1.509 | 0.501 | 0.994 | Imputed   |
| rs11450137  | 10:18593447_A/AT                  | 0.368 | 0.000 | 0.963 | 0.861 | 1.076 | 0.501 | 0.868 | Imputed   |
| rs76111180  | 10:18451630_C/G                   | 0.028 | 0.770 | 1.111 | 0.818 | 1.509 | 0.501 | 0.996 | Imputed   |
| rs79491610  | 10:18514731_G/T                   | 0.002 | 1.000 | 1.568 | 0.423 | 5.812 | 0.501 | 0.884 | Imputed   |
| rs12356186  | 10:18646023_A/G                   | 0.021 | 0.652 | 0.878 | 0.602 | 1.281 | 0.501 | 0.852 | Imputed   |
| rs7897421   | 10:18813977_A/C                   | 0.334 | 0.398 | 1.037 | 0.932 | 1.154 | 0.501 | 0.976 | Imputed   |
| rs4747350   | 10:18819869_C/G                   | 0.338 | 0.622 | 1.037 | 0.933 | 1.153 | 0.501 | 0.991 | Imputed   |
| rs138556771 | 10:18824718_A/ATATT               | 0.074 | 0.909 | 0.936 | 0.773 | 1.134 | 0.502 | 0.993 | Imputed   |
| 10:18824589 | 10:18824589_C/CTACTTGGGAGGCTGAGGC |       |       |       |       |       |       |       |           |
|             | AGGAGAATGGTGTGAACCTGG             | 0.074 | 0.909 | 0.937 | 0.773 | 1.134 | 0.502 | 0.993 | Imputed   |
| rs11014696  | 10:18821662_A/C                   | 0.074 | 0.909 | 0.937 | 0.774 | 1.134 | 0.502 | 0.993 | Imputed   |
| rs150373360 | 10:18759681_G/A                   | 0.008 | 1.000 | 1.220 | 0.682 | 2.181 | 0.502 | 0.983 | Imputed   |
| rs1892009   | 10:18480587_T/A                   | 0.040 | 0.032 | 0.915 | 0.706 | 1.186 | 0.502 | 0.941 | Imputed   |
| rs150534429 | 10:18430167_G/C                   | 0.023 | 0.004 | 1.131 | 0.789 | 1.620 | 0.503 | 0.804 | Imputed   |
| rs148465194 | 10:18691019_C/A                   | 0.002 | 1.000 | 1.569 | 0.420 | 5.862 | 0.503 | 0.670 | Imputed   |
| rs191051687 | 10:18916479_G/A                   | 0.002 | 1.000 | 1.598 | 0.405 | 6.297 | 0.503 | 0.721 | Imputed   |
| rs9417346   | 10:18330433_A/T                   | 0.780 | 0.127 | 0.960 | 0.852 | 1.082 | 0.503 | 0.990 | Imputed   |
| rs1277754   | 10:18523329_A/G                   | 0.680 | 0.002 | 0.964 | 0.866 | 1.073 | 0.503 | 0.961 | Imputed   |
| rs191279577 | 10:18556371_C/T                   | 0.003 | 1.000 | 1.454 | 0.486 | 4.351 | 0.504 | 0.775 | Imputed   |
| rs111794484 | 10:18571491_A/C                   | 0.005 | 1.000 | 1.335 | 0.572 | 3.119 | 0.504 | 0.654 | Imputed   |
| 10:18916953 | 10:18916953_G/A                   | 0.002 | 1.000 | 1.596 | 0.405 | 6.298 | 0.504 | 0.721 | Imputed   |
| rs11014101  | 10:18697349_A/G                   | 0.227 | 0.223 | 1.041 | 0.925 | 1.172 | 0.504 | 0.995 | Imputed   |
| rs11014102  | 10:18697359_A/G                   | 0.227 | 0.223 | 1.041 | 0.925 | 1.172 | 0.505 | 0.995 | Imputed   |
| rs10764523  | 10:18768742_C/G                   | 0.282 | 1.000 | 0.963 | 0.860 | 1.077 | 0.505 | 0.976 | Imputed   |
| rs192400349 | 10:18917022_G/C                   | 0.002 | 1.000 | 1.594 | 0.404 | 6.291 | 0.506 | 0.720 | Imputed   |
| rs12255742  | 10:18409840_C/T                   | 0.169 | 0.463 | 1.046 | 0.916 | 1.196 | 0.506 | 0.989 | Imputed   |
| rs7898513   | 10:18801014_T/C                   | 0.252 | 0.329 | 0.961 | 0.855 | 1.080 | 0.506 | 0.970 | Imputed   |
| rs11014166  | 10:18708798_A/T                   | 0.274 | 0.008 | 0.963 | 0.863 | 1.075 | 0.506 | 0.995 | Imputed   |
| rs113930288 | 10:18650263_TAAA/TA               | 0.120 | 0.603 | 0.949 | 0.812 | 1.108 | 0.507 | 0.959 | Imputed   |
| rs2482104   | 10:18559707_C/T                   | 0.778 | 0.072 | 1.042 | 0.923 | 1.177 | 0.507 | 0.963 | Imputed   |
| rs74768460  | 10:18373371_C/T                   | 0.013 | 1.000 | 0.844 | 0.511 | 1.394 | 0.508 | 0.788 | Imputed   |
| rs79882327  | 10:18413070_T/C                   | 0.048 | 0.052 | 0.923 | 0.729 | 1.169 | 0.508 | 0.950 | Imputed   |
| rs1277741   | 10:18559210_A/T                   | 0.778 | 0.072 | 1.042 | 0.923 | 1.176 | 0.508 | 0.964 | Imputed   |
| rs1277747   | 10:18520485_A/G                   | 0.645 | 0.105 | 0.966 | 0.871 | 1.071 | 0.508 | 0.996 | Imputed   |
| rs10828689  | 10:18721957_G/C                   | 0.381 | 0.003 | 0.966 | 0.873 | 1.070 | 0.508 | 0.977 | Imputed   |
| rs182216218 | 10:18809566_C/A                   | 0.001 | 1.000 | 1.730 | 0.341 | 8.766 | 0.508 | 0.640 | Imputed   |
| rs6482355   | 10:18651860_A/G                   | 0.568 | 0.233 | 0.967 | 0.874 | 1.069 | 0.508 | 0.983 | Imputed   |
| rs12257060  | 10:18409656_A/G                   | 0.152 | 0.108 | 1.048 | 0.911 | 1.206 | 0.509 | 0.966 | Imputed   |
| rs149780845 | 10:18750924_G/A                   | 0.006 | 0.107 | 1.253 | 0.642 | 2.445 | 0.509 | 0.892 | Imputed   |
| rs12258900  | 10:18409657_T/C                   | 0.152 | 0.108 | 1.048 | 0.911 | 1.206 | 0.509 | 0.966 | Imputed   |
| rs1277755   | 10:18523848_A/G                   | 0.960 | 0.001 | 1.093 | 0.839 | 1.423 | 0.509 | 0.875 | Imputed   |
| rs1277732   | 10:18563533_C/G                   | 0.182 | 0.184 | 0.957 | 0.842 | 1.089 | 0.510 | 0.985 | Imputed   |
| rs12257057  | 10:18409649_A/G                   | 0.152 | 0.108 | 1.048 | 0.911 | 1.206 | 0.510 | 0.966 | Imputed   |
| rs4747349   | 10:18801234_G/C                   | 0.338 | 0.438 | 1.037 | 0.931 | 1.154 | 0.510 | 0.966 | Imputed   |
| rs11014660  | 10:18817177_T/C                   | 0.074 | 0.909 | 0.938 | 0.775 | 1.135 | 0.510 | 0.996 | Imputed   |
| rs147397792 | 10:18427081_T/G                   | 0.013 | 0.445 | 1.163 | 0.740 | 1.828 | 0.512 | 0.954 | Imputed   |
| rs138978463 | 10:18711623_CA/C                  | 0.275 | 0.011 | 0.964 | 0.864 | 1.076 | 0.512 | 0.995 | Imputed   |
| rs188714228 | 10:18392807_G/A                   | 0.019 | 0.383 | 1.141 | 0.768 | 1.696 | 0.513 | 0.862 | Imputed   |
| rs4445544   | 10:18876084_C/A                   | 0.253 | 0.643 | 0.961 | 0.853 | 1.083 | 0.513 | 0.921 | Imputed   |
| rs11013850  | 10:18652290_A/T                   | 0.150 | 0.951 | 0.954 | 0.827 | 1.099 | 0.513 | 0.964 | Imputed   |
| rs78274108  | 10:18530909_A/G                   | 0.080 | 0.020 | 0.935 | 0.763 | 1.145 | 0.514 | 0.802 | Imputed   |
| rs146047691 | 10:18855223_T/C                   | 0.063 | 0.260 | 0.930 | 0.750 | 1.155 | 0.514 | 0.906 | Imputed   |
| 10:18854758 | 10:18854758_C/T                   | 0.031 | 1.000 | 0.900 | 0.656 | 1.235 | 0.514 | 0.832 | Imputed   |
| rs11013849  | 10:18652077_T/G                   | 0.150 | 0.951 | 0.954 | 0.827 | 1.099 | 0.514 | 0.963 | Imputed   |
| rs2488134   | 10:18332682_G/A                   | 0.156 | 0.119 | 1.049 | 0.909 | 1.209 | 0.514 | 0.916 | Imputed   |
| 10:18620386 | 10:18620386_T/TAA                 | 0.038 | 1.000 | 0.909 | 0.683 | 1.211 | 0.515 | 0.834 | Imputed   |
| rs2497813   | 10:18361985_A/G                   | 0.129 | 0.832 | 0.951 | 0.816 | 1.108 | 0.516 | 0.962 | Imputed   |
| rs993864    | 10:18539795_C/T                   | 0.222 | 0.067 | 0.962 | 0.854 | 1.082 | 0.516 | 1.000 | Genotyped |
| rs144049752 | 10:18355429_G/C                   | 0.022 | 1.000 | 0.888 | 0.621 | 1.270 | 0.516 | 0.891 | Imputed   |
| rs117631267 | 10:18418644_G/A                   | 0.040 | 0.770 | 1.114 | 0.804 | 1.544 | 0.516 | 0.609 | Imputed   |
| rs77208930  | 10:18531534_T/C                   | 0.080 | 0.020 | 0.935 | 0.763 | 1.146 | 0.516 | 0.801 | Imputed   |
| rs12358149  | 10:18413731_G/A                   | 0.048 | 0.050 | 0.925 | 0.730 | 1.172 | 0.516 | 0.948 | Imputed   |
| rs2497812   | 10:18361837_G/A                   | 0.129 | 0.832 | 0.951 | 0.816 | 1.108 | 0.517 | 0.962 | Imputed   |
| rs2482107   | 10:18547331_A/T                   | 0.227 | 0.054 | 0.961 | 0.853 | 1.083 | 0.517 | 0.972 | Imputed   |
| rs34086285  | 10:18791236_C/CA                  | 0.508 | 0.003 | 1.035 | 0.932 | 1.150 | 0.517 | 0.912 | Imputed   |
| rs12358173  | 10:18811131_A/C                   | 0.075 | 0.909 | 0.939 | 0.776 | 1.136 | 0.518 | 0.999 | Imputed   |
| rs146441288 | 10:18536192_C/T                   | 0.009 | 1.000 | 1.248 | 0.638 | 2.441 | 0.518 | 0.646 | Imputed   |
| rs73591724  | 10:18365179_T/G                   | 0.013 | 1.000 | 0.848 | 0.513 | 1.400 | 0.518 | 0.747 | Imputed   |
| rs143508363 | 10:18410683_GTGT/G                | 0.157 | 0.184 | 1.046 | 0.912 | 1.201 | 0.519 | 0.985 | Imputed   |
| rs200090585 | 10:18759312_CTA/C                 | 0.008 | 1.000 | 1.211 | 0.677 | 2.165 | 0.519 | 0.978 | Imputed   |
| rs143563195 | 10:18361404_AT/ATT                | 0.129 | 0.778 | 0.951 | 0.816 | 1.108 | 0.519 | 0.963 | Imputed   |
| rs7074171   | 10:18676897_A/G                   | 0.651 | 0.309 | 0.965 | 0.864 | 1.076 | 0.519 | 0.926 | Imputed   |
| rs7069292   | 10:18546988_C/T                   | 0.696 | 0.015 | 1.037 | 0.929 | 1.157 | 0.519 | 0.951 | Imputed   |
| rs11400611  | 10:18534013_A/ATT                 | 0.239 | 0.000 | 0.960 | 0.847 | 1.088 | 0.519 | 0.856 | Imputed   |
| rs182153152 | 10:18608012_A/C                   | 0.006 | 1.000 | 1.284 | 0.600 | 2.749 | 0.519 | 0.810 | Imputed   |
| rs12357123  | 10:18809737_C/G                   | 0.075 | 0.909 | 0.939 | 0.776 | 1.136 | 0.519 | 0.999 | Imputed   |
| rs2497810   | 10:18360504_C/G                   | 0.129 | 0.778 | 0.951 | 0.816 | 1.108 | 0.520 | 0.963 | Imputed   |
| rs149574634 | 10:18667393_G/A                   | 0.012 | 0.058 | 1.181 | 0.711 | 1.964 | 0.520 | 0.812 | Imputed   |
| rs76761898  | 10:18521891_C/G                   | 0.102 | 0.494 | 1.058 | 0.891 | 1.255 | 0.521 | 0.941 | Imputed   |
| rs10828257  | 10:18410612_G/T                   | 0.157 | 0.184 | 1.046 | 0.912 | 1.200 | 0.521 | 0.985 | Imputed   |
| rs77004774  | 10:18808363_T/G                   | 0.075 | 0.909 | 0.940 | 0.777 | 1.137 | 0.521 | 0.999 | Imputed   |
| rs147841559 | 10:18560999_A/G                   | 0.013 | 0.397 | 1.169 | 0.726 | 1.881 | 0.521 | 0.882 | Imputed   |
| rs2497809   | 10:18360244_A/G                   | 0.129 | 0.778 | 0.951 | 0.816 | 1.108 | 0.521 | 0.962 | Imputed   |

# SUPPLEMENTARY DATA

|             |                   |       |       |       |       |       |       |       |           |
|-------------|-------------------|-------|-------|-------|-------|-------|-------|-------|-----------|
| rs5783593   | 10:18605385_C/T   | 0.145 | 0.001 | 0.951 | 0.814 | 1.110 | 0.522 | 0.826 | Imputed   |
| rs74661789  | 10:18498027_T/C   | 0.033 | 0.604 | 0.909 | 0.677 | 1.219 | 0.522 | 0.896 | Imputed   |
| rs151020758 | 10:18806753_G/GT  | 0.075 | 0.909 | 0.940 | 0.777 | 1.137 | 0.523 | 0.999 | Imputed   |
| rs142891605 | 10:18372104_A/C   | 0.005 | 1.000 | 1.292 | 0.589 | 2.830 | 0.523 | 0.788 | Imputed   |
| rs7074010   | 10:18713570_T/A   | 0.574 | 0.846 | 0.968 | 0.875 | 1.070 | 0.523 | 0.995 | Imputed   |
| rs11014544  | 10:18793719_A/G   | 0.162 | 0.001 | 0.955 | 0.829 | 1.100 | 0.523 | 0.898 | Imputed   |
| rs141357987 | 10:18561614_C/T   | 0.003 | 1.000 | 0.724 | 0.268 | 1.954 | 0.524 | 0.742 | Imputed   |
| rs11013700  | 10:18626566_G/T   | 0.233 | 0.011 | 0.962 | 0.853 | 1.084 | 0.524 | 0.952 | Imputed   |
| rs12260380  | 10:18409728_T/C   | 0.157 | 0.184 | 1.046 | 0.911 | 1.200 | 0.524 | 0.985 | Imputed   |
| rs73591731  | 10:18368711_A/G   | 0.013 | 1.000 | 0.849 | 0.513 | 1.405 | 0.525 | 0.742 | Imputed   |
| rs144399820 | 10:18660825_T/C   | 0.150 | 0.951 | 0.955 | 0.829 | 1.101 | 0.525 | 0.969 | Imputed   |
| rs11014594  | 10:18804458_C/T   | 0.075 | 0.909 | 0.940 | 0.777 | 1.137 | 0.525 | 0.998 | Imputed   |
| rs141484887 | 10:18563807_A/T   | 0.003 | 1.000 | 0.724 | 0.268 | 1.958 | 0.525 | 0.752 | Imputed   |
| rs2031571   | 10:18667473_T/C   | 0.121 | 0.714 | 0.951 | 0.816 | 1.110 | 0.525 | 0.972 | Imputed   |
| rs144860586 | 10:18805146_CA/C  | 0.075 | 0.909 | 0.940 | 0.777 | 1.137 | 0.525 | 0.998 | Imputed   |
| rs5783603   | 10:18749816_CA/C  | 0.124 | 0.326 | 0.947 | 0.799 | 1.121 | 0.525 | 0.813 | Imputed   |
| rs1277842   | 10:18642078_T/C   | 0.532 | 0.340 | 0.967 | 0.873 | 1.072 | 0.525 | 0.960 | Imputed   |
| rs12357063  | 10:18803338_A/G   | 0.075 | 0.909 | 0.940 | 0.777 | 1.138 | 0.525 | 0.996 | Imputed   |
| rs79348792  | 10:18499010_A/G   | 0.033 | 0.604 | 0.910 | 0.679 | 1.219 | 0.526 | 0.901 | Imputed   |
| rs11014582  | 10:18801853_G/A   | 0.075 | 0.909 | 0.940 | 0.776 | 1.138 | 0.527 | 0.990 | Imputed   |
| rs976785    | 10:18705074_C/T   | 0.274 | 0.007 | 0.965 | 0.865 | 1.077 | 0.527 | 0.990 | Imputed   |
| rs2497808   | 10:18358603_G/A   | 0.129 | 0.778 | 0.952 | 0.817 | 1.109 | 0.527 | 0.960 | Imputed   |
| rs1779217   | 10:18510996_A/G   | 0.614 | 0.571 | 1.033 | 0.933 | 1.145 | 0.527 | 1.000 | Genotyped |
| rs76180193  | 10:18563595_G/A   | 0.003 | 1.000 | 0.726 | 0.269 | 1.962 | 0.528 | 0.753 | Imputed   |
| rs7913836   | 10:18667085_T/C   | 0.628 | 0.588 | 0.967 | 0.873 | 1.072 | 0.528 | 0.993 | Imputed   |
| rs2031570   | 10:18667599_C/G   | 0.628 | 0.588 | 0.967 | 0.873 | 1.073 | 0.529 | 0.993 | Imputed   |
| rs7070847   | 10:18726054_G/A   | 0.225 | 0.086 | 0.962 | 0.853 | 1.085 | 0.529 | 0.966 | Imputed   |
| rs11013065  | 10:18511867_A/C   | 0.613 | 0.594 | 1.033 | 0.933 | 1.145 | 0.530 | 0.998 | Imputed   |
| rs112903652 | 10:18368179_C/T   | 0.013 | 1.000 | 0.851 | 0.515 | 1.408 | 0.531 | 0.753 | Imputed   |
| rs118033032 | 10:18425339_A/G   | 0.039 | 0.671 | 1.087 | 0.838 | 1.409 | 0.531 | 0.969 | Imputed   |
| rs16917281  | 10:18697682_A/G   | 0.226 | 0.278 | 1.039 | 0.923 | 1.169 | 0.531 | 0.999 | Imputed   |
| rs11012734  | 10:18405972_A/G   | 0.558 | 0.001 | 0.967 | 0.871 | 1.074 | 0.532 | 0.900 | Imputed   |
| 10:18458128 | 10:18458128_A/T   | 0.012 | 1.000 | 0.849 | 0.506 | 1.422 | 0.533 | 0.740 | Imputed   |
| rs150923437 | 10:18364809_T/C   | 0.013 | 1.000 | 0.853 | 0.516 | 1.408 | 0.534 | 0.767 | Imputed   |
| rs184689114 | 10:18656347_T/A   | 0.001 | 1.000 | 1.717 | 0.313 | 9.421 | 0.534 | 0.813 | Imputed   |
| rs75202998  | 10:18365003_G/T   | 0.013 | 1.000 | 0.853 | 0.516 | 1.409 | 0.534 | 0.767 | Imputed   |
| rs2250999   | 10:18517084_A/G   | 0.820 | 0.028 | 0.960 | 0.845 | 1.091 | 0.535 | 0.997 | Imputed   |
| rs75115217  | 10:18365312_C/A   | 0.013 | 1.000 | 0.853 | 0.516 | 1.409 | 0.535 | 0.767 | Imputed   |
| rs11015208  | 10:18917093_A/G   | 0.016 | 0.614 | 0.877 | 0.578 | 1.330 | 0.536 | 0.919 | Imputed   |
| rs4748482   | 10:18816236_T/C   | 0.249 | 0.672 | 0.964 | 0.859 | 1.083 | 0.536 | 0.989 | Imputed   |
| rs1880681   | 10:18901123_G/A   | 0.141 | 0.419 | 1.051 | 0.898 | 1.230 | 0.536 | 0.863 | Imputed   |
| rs12356533  | 10:18807644_A/G   | 0.075 | 0.909 | 0.942 | 0.779 | 1.139 | 0.536 | 0.998 | Imputed   |
| rs77148740  | 10:18533410_G/T   | 0.012 | 0.085 | 0.858 | 0.528 | 1.394 | 0.537 | 0.901 | Imputed   |
| 10:18620020 | 10:18620020_T/G   | 0.008 | 1.000 | 1.206 | 0.666 | 2.181 | 0.537 | 0.897 | Imputed   |
| rs77773672  | 10:18335474_G/T   | 0.075 | 1.000 | 1.065 | 0.871 | 1.303 | 0.537 | 0.890 | Imputed   |
| 10:18855402 | 10:18855402_C/G   | 0.022 | 0.650 | 1.128 | 0.770 | 1.652 | 0.537 | 0.800 | Imputed   |
| rs10764365  | 10:18543846_G/A   | 0.746 | 0.061 | 1.038 | 0.923 | 1.166 | 0.537 | 0.947 | Imputed   |
| rs57071336  | 10:18706043_CT/C  | 0.275 | 0.013 | 0.966 | 0.865 | 1.078 | 0.537 | 0.987 | Imputed   |
| rs117051549 | 10:18365506_G/A   | 0.013 | 1.000 | 0.854 | 0.517 | 1.411 | 0.537 | 0.769 | Imputed   |
| rs12219183  | 10:18929138_G/T   | 0.335 | 0.070 | 1.036 | 0.926 | 1.159 | 0.538 | 0.883 | Imputed   |
| rs74970036  | 10:18396511_C/CT  | 0.041 | 1.000 | 0.919 | 0.704 | 1.201 | 0.538 | 0.872 | Imputed   |
| rs187369076 | 10:18527497_C/T   | 0.005 | 1.000 | 1.306 | 0.557 | 3.059 | 0.539 | 0.628 | Imputed   |
| rs199918475 | 10:18417733_G/GA  | 0.049 | 0.050 | 0.929 | 0.734 | 1.175 | 0.539 | 0.947 | Imputed   |
| rs7923885   | 10:18654871_G/A   | 0.598 | 0.645 | 0.969 | 0.875 | 1.073 | 0.540 | 0.993 | Imputed   |
| rs148078099 | 10:18365950_G/A   | 0.013 | 1.000 | 0.855 | 0.517 | 1.413 | 0.540 | 0.771 | Imputed   |
| rs7923996   | 10:18544254_G/T   | 0.746 | 0.061 | 1.037 | 0.923 | 1.166 | 0.540 | 0.948 | Imputed   |
| rs188264533 | 10:18491309_T/G   | 0.028 | 0.534 | 1.102 | 0.807 | 1.504 | 0.540 | 0.963 | Imputed   |
| rs75254867  | 10:18763600_C/T   | 0.002 | 1.000 | 0.707 | 0.232 | 2.148 | 0.540 | 0.830 | Imputed   |
| rs10734062  | 10:18887182_A/C   | 0.965 | 0.042 | 1.111 | 0.794 | 1.554 | 0.540 | 0.654 | Imputed   |
| rs1935502   | 10:18332112_A/G   | 0.781 | 0.179 | 0.963 | 0.855 | 1.086 | 0.541 | 1.000 | Genotyped |
| 10:18614455 | 10:18614455_T/C   | 0.072 | 0.000 | 0.934 | 0.752 | 1.161 | 0.541 | 0.755 | Imputed   |
| rs11819196  | 10:18697657_C/T   | 0.226 | 0.278 | 1.038 | 0.922 | 1.168 | 0.541 | 1.000 | Genotyped |
| 10:18614453 | 10:18614453_C/T   | 0.072 | 0.000 | 0.935 | 0.752 | 1.161 | 0.541 | 0.755 | Imputed   |
| rs112147825 | 10:18764721_C/T   | 0.002 | 1.000 | 0.707 | 0.232 | 2.152 | 0.541 | 0.827 | Imputed   |
| rs1972385   | 10:18379798_G/A   | 0.014 | 1.000 | 0.855 | 0.516 | 1.415 | 0.541 | 0.737 | Imputed   |
| rs75994148  | 10:18366193_G/A   | 0.013 | 1.000 | 0.855 | 0.517 | 1.414 | 0.542 | 0.772 | Imputed   |
| rs11812617  | 10:18532229_A/G   | 0.099 | 0.099 | 1.057 | 0.884 | 1.266 | 0.542 | 0.863 | Imputed   |
| rs185603431 | 10:18679421_A/G   | 0.002 | 1.000 | 1.476 | 0.422 | 5.160 | 0.542 | 0.889 | Imputed   |
| rs66677106  | 10:18707048_G/A   | 0.274 | 0.013 | 0.966 | 0.866 | 1.079 | 0.542 | 0.991 | Imputed   |
| rs147391704 | 10:18366471_A/T   | 0.013 | 1.000 | 0.856 | 0.517 | 1.415 | 0.543 | 0.772 | Imputed   |
| rs117132521 | 10:18366249_A/G   | 0.013 | 1.000 | 0.856 | 0.517 | 1.414 | 0.543 | 0.772 | Imputed   |
| rs118052562 | 10:18366720_C/G   | 0.013 | 1.000 | 0.856 | 0.517 | 1.415 | 0.543 | 0.773 | Imputed   |
| 10:18845647 | 10:18845647_T/A   | 0.020 | 1.000 | 1.137 | 0.752 | 1.718 | 0.543 | 0.760 | Imputed   |
| 10:18845650 | 10:18845650_A/G   | 0.020 | 1.000 | 1.137 | 0.752 | 1.718 | 0.544 | 0.760 | Imputed   |
| rs16916956  | 10:18488032_A/C   | 0.033 | 0.549 | 0.911 | 0.672 | 1.233 | 0.545 | 0.856 | Imputed   |
| rs10828255  | 10:18410572_A/G   | 0.161 | 0.137 | 1.043 | 0.910 | 1.196 | 0.545 | 0.979 | Imputed   |
| rs200349047 | 10:18918510_C/A   | 0.485 | 0.184 | 1.033 | 0.930 | 1.148 | 0.545 | 0.899 | Imputed   |
| rs141388287 | 10:18367151_A/C   | 0.013 | 1.000 | 0.856 | 0.518 | 1.416 | 0.545 | 0.774 | Imputed   |
| rs148377263 | 10:18901866_A/C   | 0.002 | 1.000 | 1.460 | 0.428 | 4.981 | 0.546 | 0.817 | Imputed   |
| 10:18925612 | 10:18925612_G/C   | 0.016 | 0.485 | 0.873 | 0.563 | 1.356 | 0.546 | 0.826 | Imputed   |
| rs149932212 | 10:18841758_A/C   | 0.061 | 0.421 | 0.935 | 0.750 | 1.164 | 0.546 | 0.899 | Imputed   |
| rs2497814   | 10:18363924_G/A   | 0.135 | 0.890 | 0.955 | 0.821 | 1.110 | 0.546 | 0.951 | Imputed   |
| rs7917206   | 10:18727919_C/G   | 0.535 | 0.181 | 1.032 | 0.931 | 1.145 | 0.546 | 0.937 | Imputed   |
| rs7072642   | 10:18358107_A/G   | 0.553 | 0.225 | 1.031 | 0.934 | 1.139 | 0.546 | 0.999 | Genotyped |
| rs61842425  | 10:18418548_C/A   | 0.155 | 0.854 | 0.958 | 0.832 | 1.102 | 0.547 | 0.968 | Imputed   |
| rs144108444 | 10:18444034_C/T   | 0.002 | 1.000 | 1.508 | 0.396 | 5.744 | 0.547 | 0.745 | Imputed   |
| rs7897787   | 10:18921314_C/A   | 0.335 | 0.257 | 1.035 | 0.925 | 1.158 | 0.547 | 0.893 | Imputed   |
| rs10741041  | 10:18661781_T/C   | 0.627 | 0.398 | 0.969 | 0.874 | 1.074 | 0.547 | 0.990 | Imputed   |
| 10:18910966 | 10:18910966_G/GAC | 0.077 | 0.644 | 0.941 | 0.772 | 1.147 | 0.547 | 0.895 | Imputed   |
| rs10741020  | 10:18567464_C/A   | 0.818 | 0.266 | 1.040 | 0.914 | 1.184 | 0.548 | 0.980 | Imputed   |
| rs7919599   | 10:18661124_G/C   | 0.627 | 0.361 | 0.969 | 0.874 | 1.074 | 0.548 | 0.989 | Imputed   |
| rs1277753   | 10:18522975_T/C   | 0.821 | 0.032 | 0.961 | 0.844 | 1.094 | 0.548 | 0.971 | Imputed   |

## SUPPLEMENTARY DATA

|             |                             |       |       |       |       |       |       |       |           |
|-------------|-----------------------------|-------|-------|-------|-------|-------|-------|-------|-----------|
| rs76077446  | 10:18497253_T/A             | 0.033 | 0.600 | 0.914 | 0.680 | 1.227 | 0.548 | 0.888 | Imputed   |
| rs76304907  | 10:18573974_G/A             | 0.019 | 0.288 | 1.131 | 0.757 | 1.690 | 0.549 | 0.836 | Imputed   |
| rs79967544  | 10:18368095_A/G             | 0.013 | 1.000 | 0.857 | 0.518 | 1.418 | 0.549 | 0.775 | Imputed   |
| rs57039030  | 10:18767256_C/G             | 0.009 | 1.000 | 1.196 | 0.666 | 2.146 | 0.549 | 0.856 | Imputed   |
| rs10828598  | 10:18659517_T/C             | 0.627 | 0.361 | 0.969 | 0.874 | 1.074 | 0.549 | 0.988 | Imputed   |
| 10:18433156 | 10:18433156_G/A             | 0.001 | 1.000 | 0.616 | 0.126 | 3.004 | 0.549 | 0.828 | Imputed   |
| rs184242736 | 10:18524446_C/G             | 0.028 | 1.000 | 1.100 | 0.805 | 1.501 | 0.550 | 0.975 | Imputed   |
| rs9629911   | 10:18644612_G/C             | 0.499 | 0.507 | 0.969 | 0.875 | 1.074 | 0.550 | 0.959 | Imputed   |
| 10:18329647 | 10:18329647_G/A             | 0.003 | 1.000 | 1.378 | 0.482 | 3.940 | 0.550 | 0.836 | Imputed   |
| rs200718872 | 10:18909038_A/G             | 0.335 | 0.273 | 1.034 | 0.926 | 1.155 | 0.550 | 0.913 | Imputed   |
| rs79190403  | 10:18333517_T/C             | 0.076 | 1.000 | 1.063 | 0.869 | 1.300 | 0.550 | 0.886 | Imputed   |
| rs10764640  | 10:18928287_G/A             | 0.334 | 0.102 | 1.035 | 0.925 | 1.158 | 0.551 | 0.886 | Imputed   |
| rs7903605   | 10:18918432_G/A             | 0.334 | 0.288 | 1.035 | 0.925 | 1.157 | 0.551 | 0.896 | Imputed   |
| rs11818904  | 10:18530914_C/T             | 0.100 | 0.082 | 1.056 | 0.883 | 1.263 | 0.551 | 0.865 | Imputed   |
| rs10829060  | 10:18928169_A/T             | 0.334 | 0.102 | 1.035 | 0.925 | 1.158 | 0.551 | 0.887 | Imputed   |
| rs60553121  | 10:18587298_C/C/A           | 0.290 | 0.004 | 0.964 | 0.855 | 1.087 | 0.551 | 0.845 | Imputed   |
| rs11012588  | 10:18373341_G/C             | 0.024 | 0.626 | 0.881 | 0.582 | 1.335 | 0.551 | 0.612 | Imputed   |
| rs1325994   | 10:18657521_G/A             | 0.600 | 0.553 | 0.970 | 0.876 | 1.074 | 0.552 | 0.992 | Imputed   |
| rs10829022  | 10:18905733_T/C             | 0.335 | 0.289 | 1.034 | 0.926 | 1.154 | 0.552 | 0.922 | Imputed   |
| rs79161397  | 10:18533367_C/T             | 0.075 | 0.004 | 0.939 | 0.764 | 1.155 | 0.552 | 0.809 | Imputed   |
| rs1277744   | 10:18519612_C/T             | 0.822 | 0.035 | 0.962 | 0.846 | 1.094 | 0.552 | 0.997 | Imputed   |
| rs118128647 | 10:18368610_G/A             | 0.005 | 1.000 | 1.278 | 0.569 | 2.872 | 0.553 | 0.690 | Imputed   |
| rs143000994 | 10:18367016_G/C             | 0.013 | 1.000 | 0.859 | 0.519 | 1.420 | 0.553 | 0.777 | Imputed   |
| rs10829058  | 10:18928055_C/A             | 0.333 | 0.088 | 1.035 | 0.925 | 1.158 | 0.553 | 0.888 | Imputed   |
| rs61844245  | 10:18550496_G/A             | 0.151 | 0.104 | 0.956 | 0.823 | 1.110 | 0.553 | 0.873 | Imputed   |
| rs12784387  | 10:18804689_T/C             | 0.247 | 0.766 | 0.966 | 0.860 | 1.084 | 0.554 | 1.000 | Genotyped |
| rs11015196  | 10:18913344_C/G             | 0.335 | 0.273 | 1.034 | 0.925 | 1.156 | 0.554 | 0.907 | Imputed   |
| rs7894903   | 10:18918500_T/A             | 0.485 | 0.184 | 1.032 | 0.929 | 1.147 | 0.555 | 0.898 | Imputed   |
| rs7917532   | 10:18373902_T/C             | 0.548 | 0.407 | 1.032 | 0.930 | 1.145 | 0.555 | 0.921 | Imputed   |
| rs117713261 | 10:18493715_C/G             | 0.003 | 1.000 | 1.409 | 0.450 | 4.413 | 0.556 | 0.690 | Imputed   |
| rs145221977 | 10:18818172_A/AT            | 0.072 | 0.817 | 0.943 | 0.775 | 1.147 | 0.556 | 0.975 | Imputed   |
| rs113801663 | 10:18556127_T/G             | 0.813 | 0.156 | 1.039 | 0.914 | 1.182 | 0.556 | 0.978 | Imputed   |
| rs7090503   | 10:18674640_T/A             | 0.630 | 0.565 | 0.969 | 0.874 | 1.075 | 0.556 | 0.991 | Imputed   |
| rs77726527  | 10:18481525_C/T             | 0.018 | 0.252 | 0.888 | 0.597 | 1.320 | 0.557 | 0.892 | Imputed   |
| rs1972396   | 10:18599137_C/T             | 0.965 | 0.547 | 1.095 | 0.808 | 1.485 | 0.557 | 0.789 | Imputed   |
| rs111363531 | 10:18899604_T/A             | 0.002 | 1.000 | 0.705 | 0.220 | 2.261 | 0.557 | 0.836 | Imputed   |
| rs200084511 | 10:18782108_CTTTG/C         | 0.013 | 0.383 | 1.150 | 0.721 | 1.834 | 0.557 | 0.860 | Imputed   |
| 10:18589634 | 10:18589634_C/T             | 0.002 | 1.000 | 0.661 | 0.166 | 2.636 | 0.557 | 0.690 | Imputed   |
| rs117923122 | 10:18556129_T/G             | 0.813 | 0.156 | 1.039 | 0.914 | 1.182 | 0.557 | 0.979 | Imputed   |
| rs11597110  | 10:18897551_G/C             | 0.141 | 0.348 | 1.048 | 0.896 | 1.226 | 0.557 | 0.869 | Imputed   |
| rs74420980  | 10:18755423_A/G             | 0.042 | 0.549 | 0.927 | 0.719 | 1.194 | 0.557 | 0.953 | Imputed   |
| rs9982229   | 10:18704136_G/A             | 0.275 | 0.008 | 0.968 | 0.867 | 1.080 | 0.557 | 0.987 | Imputed   |
| rs147806410 | 10:18829222_A/ATGT          | 0.143 | 0.402 | 1.045 | 0.902 | 1.211 | 0.558 | 0.961 | Imputed   |
| rs191139922 | 10:18921744_C/A             | 0.002 | 1.000 | 0.707 | 0.221 | 2.256 | 0.558 | 0.772 | Imputed   |
| rs192517936 | 10:18905505_T/C             | 0.002 | 1.000 | 1.443 | 0.423 | 4.929 | 0.558 | 0.837 | Imputed   |
| rs11816378  | 10:18529646_G/A             | 0.100 | 0.070 | 1.055 | 0.882 | 1.261 | 0.560 | 0.868 | Imputed   |
| rs12249229  | 10:18572508_C/A             | 0.814 | 0.266 | 1.040 | 0.912 | 1.186 | 0.560 | 0.939 | Imputed   |
| rs2488152   | 10:18355456_A/G             | 0.129 | 0.778 | 0.955 | 0.819 | 1.114 | 0.560 | 0.950 | Imputed   |
| rs4748481   | 10:18816007_C/T             | 0.248 | 0.611 | 0.966 | 0.861 | 1.085 | 0.561 | 0.992 | Imputed   |
| 10:18364523 | 10:18364523_A/AATGT         | 0.013 | 1.000 | 0.862 | 0.522 | 1.424 | 0.562 | 0.764 | Imputed   |
| rs147780391 | 10:18364523_A/AATGT         | 0.013 | 1.000 | 0.862 | 0.522 | 1.424 | 0.562 | 0.764 | Imputed   |
| rs138369898 | 10:18694880_AAAAC/AAAACAAAC | 0.225 | 0.240 | 1.036 | 0.919 | 1.168 | 0.562 | 0.979 | Imputed   |
| rs60010151  | 10:18344089_A/T             | 0.020 | 1.000 | 0.877 | 0.564 | 1.366 | 0.562 | 0.653 | Imputed   |
| rs117105638 | 10:18424864_G/A             | 0.013 | 0.445 | 1.144 | 0.726 | 1.803 | 0.563 | 0.956 | Imputed   |
| rs186741480 | 10:18422443_A/G             | 0.039 | 0.667 | 1.080 | 0.832 | 1.401 | 0.563 | 0.973 | Imputed   |
| rs61842676  | 10:18597330_C/T             | 0.160 | 0.002 | 0.959 | 0.831 | 1.106 | 0.563 | 0.892 | Imputed   |
| 10:18436947 | 10:18436947_GT/G            | 0.004 | 1.000 | 1.296 | 0.537 | 3.127 | 0.564 | 0.728 | Imputed   |
| rs188758263 | 10:18771940_T/C             | 0.017 | 0.096 | 1.124 | 0.756 | 1.672 | 0.564 | 0.920 | Imputed   |
| rs61842675  | 10:18597229_A/T             | 0.160 | 0.002 | 0.959 | 0.831 | 1.106 | 0.564 | 0.892 | Imputed   |
| rs17681709  | 10:18542339_A/G             | 0.153 | 0.069 | 0.957 | 0.824 | 1.111 | 0.564 | 0.862 | Imputed   |
| rs61842677  | 10:18597598_G/A             | 0.159 | 0.002 | 0.959 | 0.831 | 1.106 | 0.564 | 0.894 | Imputed   |
| rs6482258   | 10:18570839_C/T             | 0.817 | 0.267 | 1.039 | 0.913 | 1.182 | 0.565 | 0.977 | Imputed   |
| rs74892343  | 10:18644559_CT/C            | 0.080 | 0.169 | 1.061 | 0.868 | 1.296 | 0.565 | 0.835 | Imputed   |
| rs10829042  | 10:18917088_C/G             | 0.508 | 0.411 | 1.031 | 0.930 | 1.142 | 0.566 | 0.945 | Imputed   |
| rs7897882   | 10:18570666_T/G             | 0.817 | 0.267 | 1.039 | 0.913 | 1.182 | 0.566 | 0.977 | Imputed   |
| rs7906604   | 10:18570490_G/A             | 0.817 | 0.267 | 1.039 | 0.913 | 1.182 | 0.566 | 0.978 | Imputed   |
| rs77082081  | 10:18443391_T/G             | 0.153 | 0.951 | 0.960 | 0.835 | 1.104 | 0.566 | 0.995 | Imputed   |
| rs2148186   | 10:18652359_T/A             | 0.599 | 0.669 | 0.971 | 0.877 | 1.075 | 0.566 | 0.994 | Imputed   |
| rs11013221  | 10:18548637_G/C             | 0.334 | 0.000 | 0.968 | 0.866 | 1.082 | 0.567 | 0.884 | Imputed   |
| rs4748458   | 10:18674224_C/T             | 0.627 | 0.458 | 0.970 | 0.876 | 1.075 | 0.567 | 0.999 | Genotyped |
| rs7077637   | 10:18928274_G/T             | 0.516 | 0.429 | 1.030 | 0.930 | 1.141 | 0.567 | 0.952 | Imputed   |
| rs10828666  | 10:18704124_T/C             | 0.275 | 0.009 | 0.968 | 0.867 | 1.081 | 0.567 | 0.988 | Imputed   |
| rs6482356   | 10:18651910_C/G             | 0.599 | 0.669 | 0.971 | 0.877 | 1.075 | 0.567 | 0.994 | Imputed   |
| rs1352655   | 10:18929681_C/A             | 0.516 | 0.359 | 1.030 | 0.930 | 1.141 | 0.568 | 0.951 | Imputed   |
| rs4748457   | 10:18672145_T/G             | 0.149 | 0.850 | 0.959 | 0.831 | 1.107 | 0.568 | 0.965 | Imputed   |
| rs7101352   | 10:18927937_T/A             | 0.516 | 0.429 | 1.030 | 0.930 | 1.141 | 0.568 | 0.953 | Imputed   |
| rs190761352 | 10:18899128_T/C             | 0.002 | 1.000 | 1.429 | 0.419 | 4.877 | 0.568 | 0.846 | Imputed   |
| rs17613287  | 10:18719677_A/T             | 0.274 | 0.003 | 0.968 | 0.867 | 1.081 | 0.569 | 0.983 | Imputed   |
| rs187640977 | 10:18840054_T/C             | 0.022 | 0.706 | 1.112 | 0.772 | 1.602 | 0.569 | 0.869 | Imputed   |
| rs11015263  | 10:18925775_T/A             | 0.516 | 0.429 | 1.030 | 0.930 | 1.141 | 0.570 | 0.954 | Imputed   |
| rs10741099  | 10:18820341_C/T             | 0.514 | 0.635 | 1.029 | 0.931 | 1.138 | 0.570 | 0.994 | Imputed   |
| 10:18847277 | 10:18847277_T/C             | 0.043 | 0.823 | 0.924 | 0.702 | 1.216 | 0.570 | 0.790 | Imputed   |
| rs141783786 | 10:18778669_T/C             | 0.024 | 0.284 | 1.100 | 0.791 | 1.529 | 0.571 | 0.973 | Imputed   |
| rs11353752  | 10:18651836_TA/T            | 0.599 | 0.669 | 0.971 | 0.877 | 1.075 | 0.571 | 0.994 | Imputed   |
| rs148903371 | 10:18655221_C/T             | 0.049 | 0.103 | 1.071 | 0.845 | 1.358 | 0.571 | 0.939 | Imputed   |
| rs7898858   | 10:18653861_A/C             | 0.599 | 0.645 | 0.971 | 0.877 | 1.075 | 0.572 | 0.993 | Imputed   |
| rs1631911   | 10:18512884_T/C             | 0.818 | 0.022 | 0.964 | 0.848 | 1.095 | 0.572 | 0.989 | Imputed   |
| rs183607912 | 10:18772136_A/G             | 0.005 | 1.000 | 0.804 | 0.377 | 1.713 | 0.572 | 0.932 | Imputed   |
| rs10741100  | 10:18820454_G/C             | 0.514 | 0.681 | 1.029 | 0.931 | 1.138 | 0.572 | 0.994 | Imputed   |
| rs1631891   | 10:18512890_C/A             | 0.818 | 0.022 | 0.964 | 0.848 | 1.095 | 0.572 | 0.989 | Imputed   |
| rs2497804   | 10:18354127_T/C             | 0.129 | 0.943 | 0.957 | 0.820 | 1.116 | 0.573 | 0.947 | Imputed   |
| rs112364560 | 10:18699740_C/G             | 0.020 | 0.196 | 1.109 | 0.775 | 1.586 | 0.573 | 0.948 | Imputed   |

SUPPLEMENTARY DATA

|             |                     |       |       |       |       |       |       |       |           |
|-------------|---------------------|-------|-------|-------|-------|-------|-------|-------|-----------|
| rs2148185   | 10:18652575_G/A     | 0.599 | 0.645 | 0.971 | 0.877 | 1.075 | 0.573 | 0.994 | Imputed   |
| rs2489204   | 10:18508434_G/C     | 0.821 | 0.008 | 0.963 | 0.845 | 1.098 | 0.573 | 0.948 | Imputed   |
| rs11014313  | 10:18745174_C/A     | 0.252 | 0.379 | 1.034 | 0.921 | 1.159 | 0.574 | 0.983 | Imputed   |
| rs113014090 | 10:18862854_G/A     | 0.002 | 1.000 | 0.712 | 0.218 | 2.327 | 0.574 | 0.783 | Imputed   |
| rs188897163 | 10:18647402_G/A     | 0.011 | 1.000 | 0.841 | 0.461 | 1.537 | 0.574 | 0.645 | Imputed   |
| rs1419250   | 10:18568048_G/A     | 0.817 | 0.267 | 1.038 | 0.912 | 1.181 | 0.574 | 0.983 | Imputed   |
| rs10764566  | 10:18810674_G/A     | 0.514 | 0.874 | 1.029 | 0.931 | 1.137 | 0.574 | 1.000 | Genotyped |
| rs189716553 | 10:18923340_A/C     | 0.020 | 0.002 | 1.115 | 0.763 | 1.628 | 0.574 | 0.809 | Imputed   |
| 10:18923693 | 10:18923693_C/CAAAC | 0.516 | 0.448 | 1.030 | 0.930 | 1.141 | 0.574 | 0.955 | Imputed   |
| rs10764392  | 10:18567678_A/G     | 0.817 | 0.267 | 1.038 | 0.912 | 1.181 | 0.575 | 0.984 | Imputed   |
| rs7895235   | 10:18820656_C/T     | 0.514 | 0.658 | 1.029 | 0.931 | 1.137 | 0.575 | 0.994 | Imputed   |
| rs113639577 | 10:18863372_A/G     | 0.002 | 1.000 | 0.713 | 0.218 | 2.330 | 0.575 | 0.786 | Imputed   |
| rs11014523  | 10:18790265_T/G     | 0.319 | 0.161 | 0.968 | 0.864 | 1.084 | 0.575 | 0.909 | Imputed   |
| rs7895467   | 10:18762948_G/A     | 0.293 | 0.970 | 0.969 | 0.868 | 1.081 | 0.575 | 1.000 | Genotyped |
| rs201436999 | 10:18882336_CA/C    | 0.009 | 1.000 | 1.184 | 0.656 | 2.138 | 0.575 | 0.783 | Imputed   |
| rs10828263  | 10:18421204_G/A     | 0.295 | 0.595 | 1.032 | 0.924 | 1.153 | 0.575 | 0.989 | Imputed   |
| rs7914927   | 10:18498852_C/T     | 0.037 | 0.229 | 0.923 | 0.698 | 1.222 | 0.576 | 0.883 | Imputed   |
| rs10829054  | 10:18921974_T/G     | 0.516 | 0.448 | 1.030 | 0.930 | 1.140 | 0.576 | 0.958 | Imputed   |
| rs111646368 | 10:18685041_A/G     | 0.020 | 0.206 | 1.107 | 0.775 | 1.580 | 0.576 | 0.955 | Imputed   |
| rs1628528   | 10:18513289_T/G     | 0.818 | 0.029 | 0.964 | 0.848 | 1.096 | 0.576 | 0.990 | Imputed   |
| rs73601575  | 10:18570293_T/C     | 0.088 | 0.027 | 1.055 | 0.874 | 1.274 | 0.576 | 0.869 | Imputed   |
| rs9731688   | 10:18572304_A/G     | 0.817 | 0.267 | 1.038 | 0.911 | 1.182 | 0.577 | 0.964 | Imputed   |
| rs146892396 | 10:18633256_C/T     | 0.035 | 0.628 | 1.084 | 0.816 | 1.439 | 0.577 | 0.945 | Imputed   |
| rs150610002 | 10:18480457_G/C     | 0.054 | 0.040 | 0.939 | 0.752 | 1.173 | 0.578 | 0.956 | Imputed   |
| rs7098313   | 10:18922557_G/A     | 0.516 | 0.448 | 1.029 | 0.930 | 1.140 | 0.578 | 0.957 | Imputed   |
| rs7077692   | 10:18922472_C/T     | 0.516 | 0.448 | 1.029 | 0.929 | 1.140 | 0.578 | 0.957 | Imputed   |
| rs7084525   | 10:18922567_A/G     | 0.516 | 0.448 | 1.029 | 0.929 | 1.140 | 0.578 | 0.957 | Imputed   |
| rs190013242 | 10:18925593_C/T     | 0.004 | 0.057 | 1.298 | 0.518 | 3.249 | 0.578 | 0.743 | Imputed   |
| rs2489220   | 10:18551998_G/A     | 0.444 | 0.000 | 0.971 | 0.876 | 1.077 | 0.578 | 0.919 | Imputed   |
| rs61392234  | 10:18333689_TC/T    | 0.155 | 0.133 | 1.041 | 0.903 | 1.200 | 0.578 | 0.924 | Imputed   |
| rs142902380 | 10:18795717_G/GTATT | 0.041 | 0.067 | 0.928 | 0.711 | 1.210 | 0.579 | 0.854 | Imputed   |
| rs67334960  | 10:18833927_GGAT/G  | 0.103 | 0.932 | 1.051 | 0.882 | 1.251 | 0.579 | 0.903 | Imputed   |
| rs78940411  | 10:18802901_T/C     | 0.068 | 0.621 | 1.059 | 0.864 | 1.300 | 0.579 | 0.911 | Imputed   |
| rs61842674  | 10:18596862_C/G     | 0.160 | 0.003 | 0.960 | 0.832 | 1.108 | 0.579 | 0.892 | Imputed   |
| rs10764578  | 10:18818071_A/C     | 0.533 | 0.568 | 1.029 | 0.931 | 1.137 | 0.579 | 0.990 | Imputed   |
| 10:18813136 | 10:18813136_GTT/G   | 0.003 | 1.000 | 0.740 | 0.255 | 2.145 | 0.579 | 0.749 | Imputed   |
| rs74664444  | 10:18904598_A/C     | 0.021 | 0.002 | 1.113 | 0.763 | 1.623 | 0.580 | 0.811 | Imputed   |
| rs184532571 | 10:18824720_A/T     | 0.006 | 0.107 | 1.215 | 0.610 | 2.421 | 0.580 | 0.803 | Imputed   |
| rs10764373  | 10:18553665_G/T     | 0.566 | 0.040 | 1.029 | 0.930 | 1.139 | 0.580 | 0.966 | Imputed   |
| rs7919809   | 10:18652984_C/G     | 0.553 | 0.321 | 0.972 | 0.879 | 1.075 | 0.580 | 0.984 | Imputed   |
| rs117382212 | 10:18380692_C/T     | 0.012 | 1.000 | 0.866 | 0.521 | 1.440 | 0.580 | 0.804 | Imputed   |
| rs181143009 | 10:18592867_C/T     | 0.012 | 1.000 | 0.864 | 0.515 | 1.450 | 0.580 | 0.787 | Imputed   |
| rs1954283   | 10:18335200_C/T     | 0.431 | 0.001 | 1.029 | 0.929 | 1.140 | 0.581 | 0.950 | Imputed   |
| rs117583381 | 10:18754238_G/A     | 0.042 | 0.534 | 0.931 | 0.722 | 1.201 | 0.582 | 0.949 | Imputed   |
| rs190784382 | 10:18553211_G/A     | 0.003 | 1.000 | 0.756 | 0.280 | 2.044 | 0.582 | 0.845 | Imputed   |
| rs148264321 | 10:18522819_C/T     | 0.005 | 0.004 | 1.212 | 0.611 | 2.406 | 0.582 | 0.900 | Imputed   |
| rs76927282  | 10:18748174_T/C     | 0.001 | 1.000 | 0.609 | 0.104 | 3.563 | 0.582 | 0.612 | Imputed   |
| rs200070497 | 10:18618433_GAAA/G  | 0.268 | 0.000 | 1.034 | 0.918 | 1.164 | 0.582 | 0.872 | Imputed   |
| rs72784212  | 10:18537013_G/A     | 0.004 | 1.000 | 1.295 | 0.515 | 3.255 | 0.583 | 0.693 | Imputed   |
| 10:18686741 | 10:18686741_C/A     | 0.002 | 1.000 | 1.365 | 0.447 | 4.164 | 0.584 | 0.890 | Imputed   |
| rs76892998  | 10:18538763_A/G     | 0.012 | 1.000 | 0.854 | 0.484 | 1.505 | 0.584 | 0.638 | Imputed   |
| rs11014981  | 10:18867816_G/T     | 0.250 | 0.670 | 0.967 | 0.858 | 1.090 | 0.584 | 0.928 | Imputed   |
| rs61844246  | 10:18551226_A/G     | 0.150 | 0.171 | 0.959 | 0.826 | 1.114 | 0.584 | 0.874 | Imputed   |
| rs11014154  | 10:18706320_G/A     | 0.202 | 0.382 | 0.966 | 0.852 | 1.095 | 0.585 | 0.963 | Imputed   |
| rs373762036 | 10:18703701_C/CT    | 0.270 | 0.008 | 0.969 | 0.867 | 1.084 | 0.585 | 0.973 | Imputed   |
| rs185747274 | 10:18435475_C/T     | 0.002 | 1.000 | 0.686 | 0.178 | 2.652 | 0.585 | 0.809 | Imputed   |
| rs191708278 | 10:18762300_T/C     | 0.001 | 1.000 | 0.639 | 0.128 | 3.198 | 0.585 | 0.935 | Imputed   |
| rs12773254  | 10:18891168_G/C     | 0.141 | 0.203 | 1.045 | 0.893 | 1.221 | 0.585 | 0.872 | Imputed   |
| rs12247061  | 10:18824633_T/C     | 0.712 | 0.356 | 1.031 | 0.924 | 1.151 | 0.586 | 0.993 | Imputed   |
| rs76105158  | 10:18613416_A/T     | 0.011 | 1.000 | 1.183 | 0.647 | 2.163 | 0.586 | 0.687 | Imputed   |
| rs76540339  | 10:18827886_A/C     | 0.172 | 0.469 | 0.964 | 0.844 | 1.101 | 0.587 | 0.995 | Imputed   |
| rs138688801 | 10:18605948_T/G     | 0.031 | 0.782 | 0.918 | 0.675 | 1.249 | 0.587 | 0.893 | Imputed   |
| rs144747751 | 10:18841887_A/C     | 0.018 | 1.000 | 1.115 | 0.752 | 1.655 | 0.588 | 0.897 | Imputed   |
| rs10828399  | 10:18553968_G/A     | 0.566 | 0.029 | 1.028 | 0.929 | 1.138 | 0.588 | 0.966 | Imputed   |
| rs10741115  | 10:18915307_C/T     | 0.336 | 0.230 | 1.031 | 0.923 | 1.153 | 0.588 | 0.899 | Imputed   |
| rs10829039  | 10:18915159_T/C     | 0.336 | 0.230 | 1.031 | 0.923 | 1.153 | 0.588 | 0.900 | Imputed   |
| rs10829040  | 10:18917047_C/T     | 0.336 | 0.203 | 1.031 | 0.922 | 1.153 | 0.588 | 0.895 | Imputed   |
| rs10734063  | 10:18915760_T/C     | 0.336 | 0.230 | 1.031 | 0.923 | 1.153 | 0.588 | 0.899 | Imputed   |
| rs10829037  | 10:18914719_C/T     | 0.336 | 0.230 | 1.031 | 0.923 | 1.153 | 0.588 | 0.900 | Imputed   |
| rs12252253  | 10:18572497_A/G     | 0.817 | 0.266 | 1.037 | 0.910 | 1.182 | 0.588 | 0.959 | Imputed   |
| rs7897101   | 10:18723306_G/A     | 0.274 | 0.001 | 0.970 | 0.869 | 1.083 | 0.589 | 0.980 | Imputed   |
| rs148193717 | 10:18563611_C/A     | 0.003 | 1.000 | 0.760 | 0.280 | 2.058 | 0.589 | 0.834 | Imputed   |
| rs11597316  | 10:18827964_A/G     | 0.004 | 1.000 | 1.319 | 0.483 | 3.598 | 0.589 | 0.653 | Imputed   |
| rs182880552 | 10:18565997_G/A     | 0.003 | 1.000 | 0.760 | 0.280 | 2.061 | 0.589 | 0.834 | Imputed   |
| rs11310932  | 10:18512920_AT/A    | 0.817 | 0.019 | 0.965 | 0.849 | 1.097 | 0.589 | 0.984 | Imputed   |
| rs7079457   | 10:18699711_G/C     | 0.140 | 1.000 | 0.961 | 0.832 | 1.110 | 0.589 | 0.989 | Imputed   |
| rs12243859  | 10:18740632_C/T     | 0.252 | 0.357 | 1.032 | 0.921 | 1.156 | 0.590 | 1.000 | Genotyped |
| rs77082067  | 10:18826219_T/C     | 0.510 | 0.569 | 1.028 | 0.930 | 1.136 | 0.590 | 0.991 | Imputed   |
| rs57334163  | 10:18773326_GA/G    | 0.938 | 0.069 | 1.063 | 0.852 | 1.326 | 0.590 | 0.858 | Imputed   |
| rs148743928 | 10:18682996_G/A     | 0.007 | 0.148 | 0.841 | 0.449 | 1.578 | 0.590 | 0.824 | Imputed   |
| rs61545603  | 10:18439747_C/T     | 0.153 | 1.000 | 0.962 | 0.837 | 1.106 | 0.590 | 0.992 | Imputed   |
| rs144703730 | 10:18374457_T/C     | 0.012 | 1.000 | 0.870 | 0.525 | 1.443 | 0.590 | 0.798 | Imputed   |
| rs190693141 | 10:18870942_T/G     | 0.003 | 1.000 | 0.730 | 0.232 | 2.300 | 0.591 | 0.606 | Imputed   |
| rs6482423   | 10:18725053_T/C     | 0.275 | 0.001 | 0.970 | 0.869 | 1.084 | 0.592 | 0.979 | Imputed   |
| rs76763559  | 10:18704955_C/T     | 0.020 | 0.196 | 1.103 | 0.771 | 1.576 | 0.592 | 0.953 | Imputed   |
| rs116957158 | 10:18824736_G/A     | 0.017 | 0.331 | 1.113 | 0.751 | 1.651 | 0.593 | 0.945 | Imputed   |
| rs4748472   | 10:18776197_C/T     | 0.696 | 0.079 | 0.970 | 0.867 | 1.085 | 0.594 | 0.927 | Imputed   |
| rs78875492  | 10:18443804_G/C     | 0.028 | 0.536 | 1.087 | 0.800 | 1.478 | 0.594 | 0.982 | Imputed   |
| rs184163686 | 10:18547318_T/G     | 0.003 | 1.000 | 0.763 | 0.283 | 2.061 | 0.594 | 0.835 | Imputed   |
| rs77999982  | 10:18514304_C/T     | 0.053 | 0.749 | 0.940 | 0.749 | 1.180 | 0.594 | 0.950 | Imputed   |
| rs7894806   | 10:18349615_G/C     | 0.448 | 0.000 | 1.029 | 0.927 | 1.141 | 0.595 | 0.906 | Imputed   |
| rs10829041  | 10:18917062_A/C     | 0.516 | 0.411 | 1.028 | 0.928 | 1.138 | 0.595 | 0.961 | Imputed   |

## SUPPLEMENTARY DATA

|             |                            |       |       |       |       |       |       |       |           |
|-------------|----------------------------|-------|-------|-------|-------|-------|-------|-------|-----------|
| 10:18715904 | 10:18715904_G/T            | 0.028 | 1.000 | 1.105 | 0.765 | 1.595 | 0.595 | 0.673 | Imputed   |
| rs79264004  | 10:18446342_A/T            | 0.028 | 0.536 | 1.087 | 0.800 | 1.477 | 0.595 | 0.982 | Imputed   |
| rs151071480 | 10:18515098_G/A            | 0.053 | 0.749 | 0.940 | 0.750 | 1.180 | 0.596 | 0.951 | Imputed   |
| rs113674496 | 10:18441673_A/C            | 0.028 | 0.534 | 1.087 | 0.799 | 1.478 | 0.596 | 0.980 | Imputed   |
| rs183598137 | 10:18378026_T/C            | 0.012 | 1.000 | 0.872 | 0.526 | 1.447 | 0.596 | 0.810 | Imputed   |
| rs2250678   | 10:18368130_A/G            | 0.721 | 0.969 | 0.970 | 0.865 | 1.087 | 0.597 | 0.947 | Imputed   |
| rs61842438  | 10:18439273_C/T            | 0.153 | 1.000 | 0.963 | 0.838 | 1.107 | 0.597 | 0.993 | Imputed   |
| rs72780057  | 10:18348611_C/G            | 0.020 | 0.595 | 0.893 | 0.588 | 1.357 | 0.597 | 0.731 | Imputed   |
| rs1757199   | 10:18533494_C/T            | 0.815 | 0.001 | 0.965 | 0.844 | 1.102 | 0.597 | 0.895 | Imputed   |
| rs150675818 | 10:18377921_A/G            | 0.012 | 1.000 | 0.873 | 0.526 | 1.447 | 0.597 | 0.811 | Imputed   |
| rs7078741   | 10:18675148_G/T            | 0.632 | 0.497 | 0.972 | 0.877 | 1.079 | 0.598 | 0.985 | Imputed   |
| rs368376467 | 10:18752516_T/G            | 0.042 | 0.399 | 0.934 | 0.723 | 1.205 | 0.598 | 0.942 | Imputed   |
| rs117675903 | 10:18378260_A/C            | 0.012 | 1.000 | 0.873 | 0.526 | 1.448 | 0.599 | 0.811 | Imputed   |
| rs144974510 | 10:18842107_T/A            | 0.018 | 1.000 | 1.112 | 0.749 | 1.650 | 0.599 | 0.904 | Imputed   |
| rs984206    | 10:18766713_A/T            | 0.645 | 0.730 | 1.029 | 0.926 | 1.142 | 0.599 | 0.981 | Imputed   |
| rs117543919 | 10:18753019_A/G            | 0.042 | 0.399 | 0.934 | 0.724 | 1.205 | 0.599 | 0.947 | Imputed   |
| rs75612042  | 10:18908815_T/C            | 0.022 | 0.675 | 1.101 | 0.769 | 1.576 | 0.600 | 0.901 | Imputed   |
| rs117866034 | 10:18377306_G/C            | 0.012 | 1.000 | 0.873 | 0.527 | 1.448 | 0.600 | 0.797 | Imputed   |
| rs12570360  | 10:18847625_C/A            | 0.330 | 0.455 | 1.029 | 0.924 | 1.146 | 0.600 | 0.966 | Imputed   |
| rs7085933   | 10:18546624_G/C            | 0.769 | 0.086 | 1.032 | 0.916 | 1.163 | 0.601 | 0.970 | Imputed   |
| rs201179827 | 10:18759340_GTA/CTA        | 0.305 | 0.970 | 0.971 | 0.871 | 1.083 | 0.601 | 0.991 | Imputed   |
| rs2482111   | 10:18517644_G/A            | 0.818 | 0.028 | 0.967 | 0.851 | 1.098 | 0.602 | 0.995 | Imputed   |
| rs78393647  | 10:18606792_C/G            | 0.009 | 1.000 | 0.858 | 0.482 | 1.526 | 0.602 | 0.856 | Imputed   |
| rs12247990  | 10:18376651_C/T            | 0.120 | 0.059 | 0.956 | 0.808 | 1.132 | 0.603 | 0.824 | Imputed   |
| rs118067107 | 10:18574670_T/C            | 0.008 | 1.000 | 0.844 | 0.446 | 1.598 | 0.603 | 0.736 | Imputed   |
| rs2497800   | 10:18351061_C/T            | 0.129 | 0.943 | 0.960 | 0.822 | 1.121 | 0.603 | 0.938 | Imputed   |
| rs141843857 | 10:18513485_T/C            | 0.003 | 1.000 | 1.311 | 0.471 | 3.648 | 0.604 | 0.786 | Imputed   |
| rs191098369 | 10:18439834_G/A            | 0.028 | 0.540 | 1.085 | 0.797 | 1.477 | 0.604 | 0.969 | Imputed   |
| rs143870127 | 10:18597193_G/A            | 0.011 | 0.076 | 0.874 | 0.526 | 1.453 | 0.604 | 0.860 | Imputed   |
| rs75582373  | 10:18368142_G/C            | 0.014 | 1.000 | 0.877 | 0.534 | 1.441 | 0.604 | 0.744 | Imputed   |
| rs10581569  | 10:18674301_CCCT/C         | 0.601 | 0.510 | 0.973 | 0.879 | 1.078 | 0.604 | 0.991 | Imputed   |
| 10:18612318 | 10:18612318_G/GT           | 0.141 | 0.734 | 0.960 | 0.822 | 1.121 | 0.605 | 0.872 | Imputed   |
| rs140972007 | 10:18612318_G/GT           | 0.141 | 0.734 | 0.960 | 0.822 | 1.121 | 0.605 | 0.872 | Imputed   |
| rs80130376  | 10:18830318_T/C            | 0.173 | 0.407 | 0.966 | 0.846 | 1.102 | 0.605 | 0.994 | Imputed   |
| rs9943388   | 10:18781040_A/G            | 0.994 | 0.098 | 0.817 | 0.379 | 1.758 | 0.605 | 0.711 | Imputed   |
| rs78473349  | 10:18438013_C/T            | 0.064 | 0.150 | 1.066 | 0.837 | 1.356 | 0.605 | 0.729 | Imputed   |
| rs185857137 | 10:18887962_A/G            | 0.002 | 1.000 | 1.382 | 0.403 | 4.740 | 0.607 | 0.915 | Imputed   |
| rs181920738 | 10:18735418_T/C            | 0.007 | 1.000 | 1.179 | 0.630 | 2.205 | 0.607 | 0.907 | Imputed   |
| rs144817021 | 10:18590534_G/T            | 0.009 | 1.000 | 0.860 | 0.483 | 1.530 | 0.607 | 0.830 | Imputed   |
| rs79909319  | 10:18658133_G/A            | 0.009 | 1.000 | 1.195 | 0.605 | 2.362 | 0.607 | 0.648 | Imputed   |
| rs4748460   | 10:18698576_C/G            | 0.024 | 0.171 | 1.090 | 0.785 | 1.514 | 0.608 | 0.985 | Imputed   |
| rs7902373   | 10:18419474_A/G            | 0.039 | 0.512 | 1.071 | 0.824 | 1.391 | 0.608 | 0.967 | Imputed   |
| rs4748476   | 10:18792875_C/T            | 0.835 | 0.008 | 1.038 | 0.900 | 1.198 | 0.609 | 0.873 | Imputed   |
| rs61842428  | 10:18421476_G/C            | 0.154 | 0.951 | 0.964 | 0.839 | 1.109 | 0.611 | 0.993 | Imputed   |
| rs6482171   | 10:18377365_A/G            | 0.121 | 0.060 | 0.957 | 0.809 | 1.133 | 0.611 | 0.823 | Imputed   |
| rs10764540  | 10:18789498_A/G            | 0.330 | 0.032 | 0.971 | 0.867 | 1.088 | 0.611 | 0.893 | Imputed   |
| 10:18876242 | 10:18876242_T/C            | 0.004 | 1.000 | 0.779 | 0.297 | 2.042 | 0.611 | 0.669 | Imputed   |
| rs2249672   | 10:18348030_T/G            | 0.772 | 0.149 | 0.969 | 0.859 | 1.094 | 0.611 | 0.957 | Imputed   |
| rs11356654  | 10:18403186_CT/C           | 0.109 | 0.010 | 0.952 | 0.785 | 1.153 | 0.611 | 0.680 | Imputed   |
| rs11012618  | 10:18377095_A/C            | 0.121 | 0.060 | 0.957 | 0.809 | 1.133 | 0.612 | 0.822 | Imputed   |
| rs34387658  | 10:18338461_TA/T           | 0.153 | 0.069 | 1.037 | 0.901 | 1.195 | 0.612 | 0.947 | Imputed   |
| rs2489213   | 10:18604400_G/A            | 0.275 | 0.004 | 1.031 | 0.917 | 1.159 | 0.612 | 0.894 | Imputed   |
| rs79982748  | 10:18559186_A/G            | 0.109 | 0.001 | 0.957 | 0.808 | 1.134 | 0.613 | 0.866 | Imputed   |
| rs10740990  | 10:18418553_A/G            | 0.496 | 0.000 | 1.029 | 0.922 | 1.148 | 0.613 | 0.833 | Imputed   |
| rs35014370  | 10:18642339_CA/C           | 0.362 | 0.000 | 0.972 | 0.869 | 1.086 | 0.613 | 0.864 | Imputed   |
| rs141712781 | 10:18513954_A/G            | 0.002 | 1.000 | 1.401 | 0.377 | 5.209 | 0.615 | 0.666 | Imputed   |
| rs61842427  | 10:18421294_A/G            | 0.164 | 0.390 | 0.966 | 0.843 | 1.106 | 0.616 | 0.980 | Imputed   |
| rs117803175 | 10:18811975_T/C            | 0.004 | 1.000 | 1.267 | 0.502 | 3.198 | 0.616 | 0.791 | Imputed   |
| rs117865332 | 10:18707803_G/A            | 0.034 | 0.354 | 0.930 | 0.700 | 1.236 | 0.617 | 0.917 | Imputed   |
| rs7908876   | 10:18668624_C/T            | 0.651 | 0.555 | 0.974 | 0.877 | 1.081 | 0.617 | 0.998 | Imputed   |
| rs116880013 | 10:18750043_A/C            | 0.041 | 0.392 | 0.937 | 0.725 | 1.211 | 0.618 | 0.949 | Imputed   |
| rs7069894   | 10:18771314_A/T            | 0.496 | 0.635 | 1.026 | 0.927 | 1.136 | 0.619 | 0.958 | Imputed   |
| rs7075571   | 10:18699404_G/C            | 0.141 | 1.000 | 0.964 | 0.836 | 1.113 | 0.620 | 0.989 | Imputed   |
| 10:18351323 | 10:18351323_C/CCA          | 0.006 | 0.132 | 0.848 | 0.443 | 1.624 | 0.620 | 0.870 | Imputed   |
| rs7068492   | 10:18411211_T/C            | 0.218 | 0.306 | 1.031 | 0.913 | 1.164 | 0.620 | 0.979 | Imputed   |
| rs12355645  | 10:18743994_G/C            | 0.288 | 0.193 | 0.972 | 0.869 | 1.087 | 0.621 | 0.958 | Imputed   |
| rs1613804   | 10:18515834_A/G            | 0.810 | 0.071 | 0.969 | 0.855 | 1.098 | 0.621 | 1.000 | Genotyped |
| rs1779246   | 10:18506911_G/A            | 0.794 | 0.006 | 0.969 | 0.853 | 1.099 | 0.621 | 0.925 | Imputed   |
| 10:18656939 | 10:18656939_C/T            | 0.007 | 1.000 | 1.170 | 0.627 | 2.186 | 0.622 | 0.907 | Imputed   |
| rs12258967  | 10:18727959_C/G            | 0.219 | 0.033 | 0.969 | 0.853 | 1.099 | 0.622 | 0.893 | Imputed   |
| rs118067588 | 10:18542051_G/A            | 0.002 | 1.000 | 1.409 | 0.358 | 5.544 | 0.624 | 0.805 | Imputed   |
| rs140874240 | 10:18519642_T/C            | 0.006 | 1.000 | 0.830 | 0.394 | 1.748 | 0.624 | 0.700 | Imputed   |
| 10:18859664 | 10:18859664_TCATTCATTCTC/T | 0.002 | 1.000 | 1.424 | 0.346 | 5.869 | 0.624 | 0.729 | Imputed   |
| rs76879993  | 10:18423159_G/T            | 0.164 | 0.391 | 0.967 | 0.844 | 1.107 | 0.625 | 0.979 | Imputed   |
| rs75901164  | 10:18423160_A/T            | 0.164 | 0.391 | 0.967 | 0.844 | 1.107 | 0.625 | 0.979 | Imputed   |
| rs10829038  | 10:18914931_A/T            | 0.517 | 0.359 | 1.026 | 0.926 | 1.136 | 0.628 | 0.962 | Imputed   |
| rs143228140 | 10:18512214_T/C            | 0.005 | 1.000 | 0.806 | 0.336 | 1.932 | 0.628 | 0.643 | Imputed   |
| rs2799573   | 10:18601928_T/C            | 0.261 | 0.460 | 1.029 | 0.918 | 1.153 | 0.628 | 0.999 | Genotyped |
| rs10828270  | 10:18439035_A/G            | 0.312 | 0.740 | 1.027 | 0.922 | 1.145 | 0.628 | 0.987 | Imputed   |
| 10:18829442 | 10:18829442_G/GCTTGA       | 0.006 | 0.098 | 1.209 | 0.560 | 2.614 | 0.629 | 0.731 | Imputed   |
| rs7921366   | 10:18914175_C/G            | 0.517 | 0.359 | 1.025 | 0.926 | 1.135 | 0.629 | 0.963 | Imputed   |
| rs6482368   | 10:18663383_A/G            | 0.629 | 0.455 | 0.975 | 0.879 | 1.081 | 0.629 | 0.989 | Imputed   |
| rs4747348   | 10:18795055_G/A            | 0.843 | 0.025 | 1.037 | 0.896 | 1.200 | 0.629 | 0.865 | Imputed   |
| rs7078285   | 10:18342796_C/T            | 0.442 | 0.353 | 1.025 | 0.927 | 1.133 | 0.630 | 0.993 | Imputed   |
| rs2691159   | 10:18914096_C/T            | 0.517 | 0.359 | 1.025 | 0.926 | 1.135 | 0.630 | 0.964 | Imputed   |
| rs2185765   | 10:18355646_A/G            | 0.721 | 0.664 | 0.972 | 0.868 | 1.090 | 0.630 | 0.949 | Imputed   |
| rs1325993   | 10:18662768_G/A            | 0.629 | 0.435 | 0.975 | 0.879 | 1.081 | 0.630 | 0.988 | Imputed   |
| rs1779212   | 10:18513733_T/C            | 0.820 | 0.018 | 0.969 | 0.852 | 1.102 | 0.631 | 0.991 | Imputed   |
| rs1570937   | 10:18758893_A/C            | 0.955 | 0.144 | 1.061 | 0.834 | 1.350 | 0.631 | 0.975 | Imputed   |
| rs11013908  | 10:18663142_G/A            | 0.134 | 0.942 | 1.039 | 0.889 | 1.215 | 0.631 | 0.891 | Imputed   |
| rs35224466  | 10:18776767_CA/C           | 0.693 | 0.001 | 0.973 | 0.870 | 1.088 | 0.632 | 0.904 | Imputed   |
| 10:18763703 | 10:18763703_C/A            | 0.001 | 1.000 | 0.688 | 0.149 | 3.180 | 0.632 | 0.827 | Imputed   |

SUPPLEMENTARY DATA

|             |                     |       |       |       |       |       |       |       |         |
|-------------|---------------------|-------|-------|-------|-------|-------|-------|-------|---------|
| rs117197627 | 10:18473835_G/T     | 0.002 | 1.000 | 1.384 | 0.365 | 5.251 | 0.633 | 0.735 | Imputed |
| rs7097047   | 10:18771308_C/T     | 0.496 | 0.613 | 1.025 | 0.926 | 1.135 | 0.633 | 0.957 | Imputed |
| rs11013641  | 10:18617629_T/C     | 0.164 | 0.401 | 0.966 | 0.837 | 1.115 | 0.633 | 0.890 | Imputed |
| rs74120215  | 10:18404269_T/A     | 0.017 | 1.000 | 0.893 | 0.561 | 1.421 | 0.634 | 0.700 | Imputed |
| rs201812400 | 10:18860166_TC/T    | 0.017 | 0.325 | 1.101 | 0.741 | 1.637 | 0.634 | 0.935 | Imputed |
| rs11015255  | 10:18924789_A/T     | 0.333 | 0.046 | 1.028 | 0.918 | 1.151 | 0.634 | 0.879 | Imputed |
| rs74229417  | 10:18670649_G/A     | 0.025 | 0.291 | 1.082 | 0.782 | 1.497 | 0.635 | 0.969 | Imputed |
| rs2497795   | 10:18344593_C/T     | 0.153 | 0.080 | 1.035 | 0.898 | 1.193 | 0.635 | 0.937 | Imputed |
| rs72780063  | 10:18355623_C/G     | 0.011 | 0.288 | 1.140 | 0.665 | 1.953 | 0.635 | 0.817 | Imputed |
| rs12257467  | 10:18511373_C/A     | 0.770 | 0.000 | 0.972 | 0.862 | 1.095 | 0.635 | 0.947 | Imputed |
| rs12256244  | 10:18750045_A/G     | 0.302 | 0.039 | 0.973 | 0.871 | 1.088 | 0.635 | 0.953 | Imputed |
| rs74707569  | 10:18670159_C/T     | 0.025 | 0.291 | 1.082 | 0.782 | 1.496 | 0.635 | 0.967 | Imputed |
| rs76884243  | 10:18670401_G/A     | 0.025 | 0.291 | 1.082 | 0.782 | 1.496 | 0.636 | 0.968 | Imputed |
| rs79500087  | 10:18596488_G/T     | 0.016 | 0.085 | 0.888 | 0.544 | 1.450 | 0.636 | 0.637 | Imputed |
| rs117463179 | 10:18667897_C/A     | 0.025 | 0.291 | 1.081 | 0.782 | 1.496 | 0.637 | 0.967 | Imputed |
| rs10764368  | 10:18545690_C/G     | 0.773 | 0.124 | 1.029 | 0.914 | 1.158 | 0.637 | 0.987 | Imputed |
| rs12247582  | 10:18750095_G/A     | 0.302 | 0.039 | 0.974 | 0.871 | 1.088 | 0.637 | 0.953 | Imputed |
| rs112313711 | 10:18427164_A/C     | 0.027 | 0.532 | 1.077 | 0.792 | 1.465 | 0.637 | 0.985 | Imputed |
| rs2497797   | 10:18345515_C/T     | 0.153 | 0.080 | 1.035 | 0.897 | 1.193 | 0.638 | 0.934 | Imputed |
| rs67241225  | 10:18616167_A/G     | 0.161 | 0.394 | 0.966 | 0.836 | 1.116 | 0.638 | 0.882 | Imputed |
| rs7074429   | 10:18676487_T/A     | 0.597 | 0.000 | 1.027 | 0.920 | 1.146 | 0.638 | 0.866 | Imputed |
| rs12779641  | 10:18821074_A/G     | 0.140 | 0.101 | 1.036 | 0.893 | 1.203 | 0.640 | 0.963 | Imputed |
| rs182405228 | 10:18762525_T/C     | 0.026 | 1.000 | 1.082 | 0.779 | 1.502 | 0.640 | 0.944 | Imputed |
| rs74118101  | 10:18356253_T/G     | 0.013 | 1.000 | 1.136 | 0.667 | 1.934 | 0.640 | 0.680 | Imputed |
| rs146758767 | 10:18382925_G/T     | 0.012 | 1.000 | 0.886 | 0.533 | 1.472 | 0.641 | 0.795 | Imputed |
| rs11013287  | 10:18561515_G/A     | 0.107 | 0.000 | 0.960 | 0.809 | 1.139 | 0.641 | 0.869 | Imputed |
| rs138155089 | 10:18611093_A/G     | 0.024 | 0.284 | 1.081 | 0.778 | 1.502 | 0.643 | 0.984 | Imputed |
| rs139355580 | 10:18408323_A/G     | 0.019 | 0.001 | 1.094 | 0.749 | 1.597 | 0.643 | 0.878 | Imputed |
| rs116871633 | 10:18599947_C/T     | 0.029 | 1.000 | 0.929 | 0.680 | 1.269 | 0.643 | 0.907 | Imputed |
| rs142857446 | 10:18429273_C/T     | 0.021 | 0.003 | 1.090 | 0.756 | 1.571 | 0.644 | 0.867 | Imputed |
| rs2497792   | 10:18341643_C/G     | 0.086 | 0.399 | 1.045 | 0.866 | 1.263 | 0.644 | 0.890 | Imputed |
| rs80255112  | 10:18409845_A/G     | 0.184 | 0.289 | 0.969 | 0.849 | 1.107 | 0.644 | 0.936 | Imputed |
| rs1409207   | 10:18672295_A/G     | 0.659 | 0.441 | 0.975 | 0.877 | 1.084 | 0.645 | 0.986 | Imputed |
| rs11013416  | 10:18587068_T/C     | 0.249 | 0.966 | 1.028 | 0.914 | 1.156 | 0.645 | 0.967 | Imputed |
| rs146845911 | 10:18797165_T/G     | 0.009 | 1.000 | 1.153 | 0.629 | 2.111 | 0.645 | 0.803 | Imputed |
| rs11014021  | 10:18682233_T/A     | 0.374 | 0.011 | 0.976 | 0.881 | 1.082 | 0.645 | 0.972 | Imputed |
| rs2357927   | 10:18546474_G/A     | 0.769 | 0.052 | 1.028 | 0.913 | 1.158 | 0.646 | 0.970 | Imputed |
| rs148124556 | 10:18600346_G/A     | 0.029 | 1.000 | 0.930 | 0.681 | 1.269 | 0.646 | 0.907 | Imputed |
| rs117217016 | 10:18350220_C/G     | 0.045 | 0.836 | 0.941 | 0.727 | 1.219 | 0.646 | 0.862 | Imputed |
| rs111550800 | 10:18708639_C/T     | 0.003 | 1.000 | 0.785 | 0.279 | 2.211 | 0.646 | 0.757 | Imputed |
| rs149697420 | 10:18657720_TTG/T   | 0.025 | 0.286 | 1.079 | 0.779 | 1.494 | 0.647 | 0.961 | Imputed |
| rs56152004  | 10:18587035_C/G     | 0.239 | 0.795 | 1.028 | 0.913 | 1.158 | 0.647 | 0.971 | Imputed |
| rs140953003 | 10:18613906_A/G     | 0.024 | 0.284 | 1.080 | 0.777 | 1.500 | 0.647 | 0.987 | Imputed |
| rs116936375 | 10:18737135_G/A     | 0.034 | 0.047 | 1.071 | 0.797 | 1.439 | 0.648 | 0.823 | Imputed |
| rs185331352 | 10:18345479_A/T     | 0.007 | 0.143 | 0.862 | 0.456 | 1.630 | 0.648 | 0.866 | Imputed |
| rs118079798 | 10:18350471_G/A     | 0.045 | 0.836 | 0.942 | 0.728 | 1.219 | 0.649 | 0.863 | Imputed |
| rs201380210 | 10:18382959_G/GC    | 0.011 | 1.000 | 0.885 | 0.524 | 1.496 | 0.649 | 0.815 | Imputed |
| rs56364834  | 10:18587146_A/C     | 0.239 | 0.795 | 1.028 | 0.913 | 1.157 | 0.650 | 0.973 | Imputed |
| rs11013596  | 10:18610468_T/G     | 0.161 | 0.274 | 0.967 | 0.836 | 1.119 | 0.650 | 0.872 | Imputed |
| rs7097534   | 10:18928162_A/G     | 0.794 | 1.000 | 1.030 | 0.907 | 1.169 | 0.650 | 0.964 | Imputed |
| rs11014267  | 10:18736974_G/A     | 0.252 | 0.315 | 1.027 | 0.916 | 1.151 | 0.650 | 0.994 | Imputed |
| rs79400969  | 10:18657835_G/A     | 0.025 | 0.075 | 1.078 | 0.779 | 1.493 | 0.650 | 0.958 | Imputed |
| rs187193798 | 10:18608442_T/C     | 0.013 | 0.103 | 1.111 | 0.705 | 1.751 | 0.650 | 0.902 | Imputed |
| 10:18382961 | 10:18382961_G/GAGC  | 0.011 | 1.000 | 0.886 | 0.524 | 1.496 | 0.650 | 0.815 | Imputed |
| rs191195508 | 10:18847339_G/A     | 0.011 | 1.000 | 0.891 | 0.541 | 1.467 | 0.650 | 0.892 | Imputed |
| rs10596294  | 10:18655393_CA/C    | 0.159 | 0.000 | 1.038 | 0.884 | 1.218 | 0.650 | 0.718 | Imputed |
| rs67117524  | 10:18698640_G/A     | 0.265 | 0.006 | 0.975 | 0.872 | 1.089 | 0.650 | 0.988 | Imputed |
| rs12248794  | 10:18506813_C/T     | 0.076 | 0.728 | 1.047 | 0.858 | 1.278 | 0.651 | 0.894 | Imputed |
| rs113491314 | 10:18575309_C/T     | 0.014 | 1.000 | 1.109 | 0.707 | 1.740 | 0.651 | 0.859 | Imputed |
| rs10764499  | 10:18732762_G/A     | 0.249 | 0.311 | 1.027 | 0.915 | 1.152 | 0.652 | 0.990 | Imputed |
| rs117261556 | 10:18776361_T/G     | 0.033 | 0.094 | 0.936 | 0.701 | 1.249 | 0.652 | 0.916 | Imputed |
| rs76956014  | 10:18816565_G/A     | 0.003 | 1.000 | 1.287 | 0.429 | 3.861 | 0.653 | 0.673 | Imputed |
| rs75340843  | 10:18656138_ATT/A   | 0.025 | 0.075 | 1.077 | 0.778 | 1.491 | 0.654 | 0.956 | Imputed |
| rs10828287  | 10:18456271_C/T     | 0.187 | 0.377 | 1.030 | 0.906 | 1.171 | 0.654 | 0.985 | Imputed |
| rs56949798  | 10:18734824_G/A     | 0.252 | 0.357 | 1.027 | 0.916 | 1.151 | 0.654 | 0.993 | Imputed |
| rs7476477   | 10:18773696_A/G     | 0.532 | 0.295 | 1.024 | 0.924 | 1.133 | 0.654 | 0.954 | Imputed |
| rs112444227 | 10:18538747_T/C     | 0.014 | 1.000 | 1.109 | 0.705 | 1.746 | 0.654 | 0.841 | Imputed |
| rs150446556 | 10:18715942_T/C     | 0.206 | 0.213 | 0.972 | 0.858 | 1.101 | 0.654 | 0.956 | Imputed |
| rs58703423  | 10:18540122_C/G     | 0.350 | 0.000 | 0.975 | 0.872 | 1.090 | 0.654 | 0.860 | Imputed |
| rs16917211  | 10:18657105_A/G     | 0.025 | 0.075 | 1.077 | 0.778 | 1.491 | 0.654 | 0.955 | Imputed |
| rs181333405 | 10:18716779_A/G     | 0.014 | 1.000 | 1.119 | 0.683 | 1.835 | 0.654 | 0.737 | Imputed |
| rs16917145  | 10:18581958_A/G     | 0.003 | 1.000 | 0.799 | 0.299 | 2.135 | 0.655 | 0.772 | Imputed |
| rs11013415  | 10:18586735_A/G     | 0.249 | 0.966 | 1.027 | 0.913 | 1.155 | 0.656 | 0.967 | Imputed |
| rs11012850  | 10:18456162_G/A     | 0.097 | 0.419 | 1.040 | 0.876 | 1.233 | 0.656 | 0.981 | Imputed |
| rs193076024 | 10:18677002_C/T     | 0.003 | 0.043 | 1.236 | 0.487 | 3.137 | 0.656 | 0.809 | Imputed |
| rs1779213   | 10:18513698_G/A     | 0.817 | 0.025 | 0.971 | 0.855 | 1.104 | 0.656 | 0.988 | Imputed |
| rs73593770  | 10:18456816_G/A     | 0.097 | 0.419 | 1.039 | 0.876 | 1.233 | 0.657 | 0.981 | Imputed |
| rs79392059  | 10:18330801_T/C     | 0.039 | 0.796 | 0.935 | 0.694 | 1.259 | 0.657 | 0.757 | Imputed |
| rs114891847 | 10:18597071_C/G     | 0.035 | 1.000 | 0.932 | 0.684 | 1.271 | 0.658 | 0.781 | Imputed |
| rs58945993  | 10:18772460_C/CA    | 0.473 | 0.000 | 1.025 | 0.919 | 1.144 | 0.658 | 0.848 | Imputed |
| rs60959154  | 10:18825204_G/T     | 0.068 | 0.017 | 1.058 | 0.823 | 1.362 | 0.658 | 0.632 | Imputed |
| rs7098625   | 10:18825203_G/T     | 0.068 | 0.017 | 1.058 | 0.823 | 1.362 | 0.658 | 0.632 | Imputed |
| rs79586955  | 10:18674765_A/T     | 0.112 | 0.378 | 0.964 | 0.821 | 1.133 | 0.660 | 0.955 | Imputed |
| rs11014170  | 10:18710991_G/A     | 0.016 | 1.000 | 0.898 | 0.557 | 1.448 | 0.660 | 0.674 | Imputed |
| 10:18509192 | 10:18509192_A/T     | 0.003 | 1.000 | 1.256 | 0.454 | 3.475 | 0.661 | 0.779 | Imputed |
| rs150738818 | 10:18671718_T/C     | 0.026 | 0.291 | 1.075 | 0.777 | 1.488 | 0.661 | 0.941 | Imputed |
| rs148596924 | 10:18521317_G/T     | 0.003 | 1.000 | 1.263 | 0.444 | 3.592 | 0.661 | 0.747 | Imputed |
| rs148733187 | 10:18507238_TCAGA/T | 0.009 | 1.000 | 0.883 | 0.507 | 1.540 | 0.661 | 0.940 | Imputed |
| rs78915471  | 10:18406409_A/G     | 0.010 | 1.000 | 1.137 | 0.639 | 2.024 | 0.662 | 0.748 | Imputed |
| rs4285782   | 10:18886478_T/C     | 0.259 | 0.180 | 0.974 | 0.864 | 1.097 | 0.662 | 0.911 | Imputed |
| 10:18410647 | 10:18410647_TGA/T   | 0.012 | 0.200 | 0.887 | 0.517 | 1.520 | 0.662 | 0.682 | Imputed |
| 10:18509191 | 10:18509191_G/A     | 0.003 | 1.000 | 1.254 | 0.453 | 3.470 | 0.663 | 0.779 | Imputed |

SUPPLEMENTARY DATA

|             |                            |       |       |       |       |       |       |       |           |
|-------------|----------------------------|-------|-------|-------|-------|-------|-------|-------|-----------|
| rs80269453  | 10:18349227_T/G            | 0.006 | 1.000 | 0.838 | 0.378 | 1.859 | 0.664 | 0.696 | Imputed   |
| rs114718583 | 10:18508916_G/A            | 0.003 | 1.000 | 1.253 | 0.453 | 3.462 | 0.664 | 0.775 | Imputed   |
| rs72786014  | 10:18608890_C/T            | 0.013 | 1.103 | 1.106 | 0.702 | 1.742 | 0.664 | 0.889 | Imputed   |
| 10:18429839 | 10:18429839_C/T            | 0.013 | 0.130 | 1.104 | 0.704 | 1.732 | 0.665 | 0.905 | Imputed   |
| rs373232333 | 10:18559508_GC/G           | 0.002 | 1.000 | 1.321 | 0.374 | 4.667 | 0.665 | 0.837 | Imputed   |
| 10:18732427 | 10:18732427_A/G            | 0.004 | 1.000 | 1.207 | 0.514 | 2.838 | 0.666 | 0.799 | Imputed   |
| rs117632060 | 10:18749624_A/G            | 0.042 | 0.404 | 0.945 | 0.732 | 1.220 | 0.666 | 0.946 | Imputed   |
| rs1757224   | 10:18516411_C/G            | 0.812 | 0.048 | 0.973 | 0.858 | 1.103 | 0.666 | 0.998 | Imputed   |
| rs76557840  | 10:18653243_T/C            | 0.026 | 0.075 | 1.074 | 0.776 | 1.488 | 0.666 | 0.917 | Imputed   |
| rs10764320  | 10:18432485_T/A            | 0.264 | 0.095 | 0.975 | 0.871 | 1.093 | 0.667 | 0.973 | Imputed   |
| rs11014399  | 10:18761705_T/G            | 0.287 | 0.908 | 0.976 | 0.874 | 1.090 | 0.667 | 0.998 | Imputed   |
| rs16917167  | 10:18597666_G/A            | 0.035 | 1.000 | 0.934 | 0.685 | 1.274 | 0.668 | 0.781 | Imputed   |
| 10:18726887 | 10:18726887_A/G            | 0.021 | 0.406 | 0.923 | 0.640 | 1.331 | 0.668 | 0.918 | Imputed   |
| rs1935499   | 10:18375174_T/G            | 0.575 | 0.219 | 1.023 | 0.920 | 1.138 | 0.668 | 0.901 | Imputed   |
| rs72095579  | 10:18734527_CGA/C          | 0.252 | 0.315 | 1.025 | 0.914 | 1.149 | 0.669 | 0.993 | Imputed   |
| rs139260290 | 10:18714166_TGTTG/T        | 0.062 | 0.009 | 1.049 | 0.841 | 1.310 | 0.670 | 0.869 | Imputed   |
| rs143401737 | 10:18414346_A/G            | 0.023 | 0.479 | 1.080 | 0.759 | 1.537 | 0.670 | 0.909 | Imputed   |
| rs181881573 | 10:18582286_A/G            | 0.003 | 1.000 | 0.808 | 0.302 | 2.158 | 0.670 | 0.801 | Imputed   |
| rs7895784   | 10:18872872_C/T            | 0.403 | 0.974 | 1.023 | 0.920 | 1.139 | 0.671 | 0.926 | Imputed   |
| rs2497801   | 10:18351260_A/G            | 0.721 | 0.554 | 0.976 | 0.870 | 1.094 | 0.671 | 0.939 | Imputed   |
| rs75692302  | 10:18749229_T/G            | 0.042 | 0.404 | 0.946 | 0.733 | 1.221 | 0.671 | 0.946 | Imputed   |
| rs148472225 | 10:18538328_AT/A           | 0.105 | 0.029 | 1.040 | 0.868 | 1.245 | 0.671 | 0.801 | Imputed   |
| rs186677779 | 10:18675302_A/G            | 0.003 | 1.000 | 0.807 | 0.299 | 2.177 | 0.672 | 0.940 | Imputed   |
| rs7071300   | 10:18883665_T/C            | 0.186 | 0.790 | 0.971 | 0.846 | 1.113 | 0.672 | 0.887 | Imputed   |
| rs7074644   | 10:18883707_T/C            | 0.186 | 0.790 | 0.971 | 0.846 | 1.114 | 0.672 | 0.887 | Imputed   |
| rs11014016  | 10:18682015_G/A            | 0.268 | 0.016 | 0.976 | 0.873 | 1.092 | 0.673 | 0.976 | Imputed   |
| rs113228742 | 10:18588949_C/CT           | 0.312 | 0.000 | 1.025 | 0.913 | 1.151 | 0.673 | 0.853 | Imputed   |
| rs57748809  | 10:18515788_C/G            | 0.058 | 0.884 | 0.954 | 0.768 | 1.186 | 0.674 | 0.962 | Imputed   |
| rs12359413  | 10:18535616_C/T            | 0.480 | 0.000 | 0.978 | 0.884 | 1.083 | 0.674 | 0.918 | Imputed   |
| rs150682619 | 10:18586231_T/C            | 0.003 | 1.000 | 0.811 | 0.307 | 2.147 | 0.674 | 0.757 | Imputed   |
| rs139610857 | 10:18586768_A/G            | 0.003 | 1.000 | 0.811 | 0.307 | 2.148 | 0.674 | 0.761 | Imputed   |
| rs184402279 | 10:18451289_C/T            | 0.001 | 1.000 | 0.705 | 0.138 | 3.596 | 0.674 | 0.692 | Imputed   |
| rs72786007  | 10:18594798_G/A            | 0.156 | 0.003 | 0.969 | 0.839 | 1.120 | 0.674 | 0.893 | Imputed   |
| rs143216794 | 10:18599333_G/A            | 0.035 | 1.000 | 0.936 | 0.686 | 1.276 | 0.675 | 0.776 | Imputed   |
| rs117586854 | 10:18748850_C/T            | 0.042 | 0.404 | 0.947 | 0.734 | 1.222 | 0.676 | 0.947 | Imputed   |
| rs74117931  | 10:18538613_C/T            | 0.105 | 0.029 | 1.039 | 0.868 | 1.244 | 0.676 | 0.801 | Imputed   |
| rs2488151   | 10:18352728_A/G            | 0.690 | 0.314 | 0.976 | 0.873 | 1.092 | 0.676 | 0.922 | Imputed   |
| rs10764602  | 10:18883858_G/C            | 0.403 | 0.671 | 1.023 | 0.919 | 1.138 | 0.677 | 0.926 | Imputed   |
| rs10764605  | 10:18884543_T/C            | 0.403 | 0.671 | 1.023 | 0.919 | 1.138 | 0.677 | 0.926 | Imputed   |
| rs61842678  | 10:18599864_A/G            | 0.200 | 0.000 | 0.972 | 0.853 | 1.109 | 0.677 | 0.889 | Imputed   |
| rs184003456 | 10:18545652_A/G            | 0.006 | 1.000 | 0.864 | 0.434 | 1.721 | 0.677 | 0.903 | Imputed   |
| rs10828967  | 10:18882432_G/T            | 0.403 | 0.769 | 1.023 | 0.919 | 1.138 | 0.677 | 0.925 | Imputed   |
| rs10430567  | 10:18882543_A/G            | 0.403 | 0.769 | 1.023 | 0.919 | 1.138 | 0.678 | 0.926 | Imputed   |
| rs77064556  | 10:18512783_C/T            | 0.028 | 0.549 | 1.068 | 0.784 | 1.454 | 0.678 | 0.932 | Imputed   |
| rs10764604  | 10:18883940_C/T            | 0.403 | 0.671 | 1.023 | 0.919 | 1.138 | 0.678 | 0.926 | Imputed   |
| rs78634605  | 10:18512408_T/G            | 0.028 | 0.549 | 1.068 | 0.784 | 1.454 | 0.679 | 0.932 | Imputed   |
| rs11014634  | 10:18811611_G/A            | 0.416 | 0.626 | 1.022 | 0.922 | 1.132 | 0.679 | 0.994 | Imputed   |
| rs2497817   | 10:18366536_A/C            | 0.497 | 0.343 | 1.022 | 0.921 | 1.135 | 0.680 | 0.914 | Imputed   |
| rs2497802   | 10:18352614_C/G            | 0.726 | 0.780 | 0.976 | 0.870 | 1.095 | 0.680 | 0.946 | Imputed   |
| rs12775446  | 10:18840427_G/C            | 0.344 | 0.648 | 0.978 | 0.880 | 1.087 | 0.680 | 0.988 | Imputed   |
| rs11014204  | 10:18720845_C/T            | 0.203 | 0.099 | 0.974 | 0.859 | 1.104 | 0.681 | 0.955 | Imputed   |
| rs78908666  | 10:18654172_T/C            | 0.026 | 0.286 | 1.070 | 0.773 | 1.482 | 0.683 | 0.931 | Imputed   |
| rs113461617 | 10:18443423_G/T            | 0.027 | 0.534 | 1.066 | 0.784 | 1.451 | 0.683 | 0.986 | Imputed   |
| rs2482110   | 10:18517749_G/A            | 0.633 | 0.038 | 0.979 | 0.883 | 1.085 | 0.683 | 0.987 | Imputed   |
| rs56074042  | 10:18537267_T/C            | 0.087 | 0.373 | 1.042 | 0.856 | 1.267 | 0.684 | 0.830 | Imputed   |
| rs58285364  | 10:18653229_ATT/A          | 0.508 | 0.000 | 1.022 | 0.920 | 1.135 | 0.685 | 0.899 | Imputed   |
| rs59881007  | 10:18508027_G/A            | 0.009 | 1.000 | 0.892 | 0.513 | 1.551 | 0.685 | 0.940 | Imputed   |
| rs1277749   | 10:18520966_A/G            | 0.630 | 0.084 | 0.979 | 0.884 | 1.085 | 0.686 | 0.996 | Imputed   |
| rs1277750   | 10:18521961_C/G            | 0.630 | 0.084 | 0.979 | 0.884 | 1.085 | 0.686 | 0.987 | Imputed   |
| rs186567508 | 10:18879643_C/T            | 0.009 | 1.000 | 0.876 | 0.462 | 1.664 | 0.686 | 0.722 | Imputed   |
| rs16916984  | 10:18499691_G/A            | 0.037 | 0.220 | 0.944 | 0.713 | 1.250 | 0.687 | 0.892 | Imputed   |
| rs5783592   | 10:18590359_C/CA           | 0.240 | 0.862 | 1.025 | 0.910 | 1.154 | 0.687 | 0.973 | Imputed   |
| rs182255073 | 10:18463587_C/T            | 0.002 | 1.000 | 1.311 | 0.351 | 4.888 | 0.687 | 0.763 | Imputed   |
| rs148533722 | 10:18651735_G/A            | 0.026 | 0.286 | 1.069 | 0.772 | 1.480 | 0.687 | 0.930 | Imputed   |
| rs12184384  | 10:18457449_AT             | 0.022 | 1.000 | 1.079 | 0.745 | 1.564 | 0.687 | 0.859 | Imputed   |
| rs72465413  | 10:18648530_GT/G           | 0.488 | 0.899 | 1.021 | 0.922 | 1.130 | 0.688 | 0.972 | Imputed   |
| rs1277748   | 10:18520535_G/A            | 0.629 | 0.084 | 0.979 | 0.884 | 1.085 | 0.689 | 1.000 | Genotyped |
| rs2497803   | 10:18352626_T/C            | 0.726 | 0.780 | 0.977 | 0.871 | 1.096 | 0.689 | 0.947 | Imputed   |
| rs10828662  | 10:18703097_C/T            | 0.471 | 0.392 | 1.021 | 0.923 | 1.129 | 0.689 | 0.976 | Imputed   |
| rs118105130 | 10:18765709_A/T            | 0.012 | 0.390 | 1.102 | 0.684 | 1.776 | 0.689 | 0.881 | Imputed   |
| rs139338937 | 10:18653085_G/A            | 0.026 | 0.075 | 1.068 | 0.772 | 1.479 | 0.690 | 0.927 | Imputed   |
| 10:18850324 | 10:18850324_G/A            | 0.057 | 0.561 | 0.951 | 0.742 | 1.218 | 0.691 | 0.753 | Imputed   |
| rs78192884  | 10:18438678_G/A            | 0.027 | 0.366 | 1.065 | 0.782 | 1.449 | 0.691 | 0.987 | Imputed   |
| rs181055014 | 10:18891511_C/T            | 0.008 | 1.000 | 1.135 | 0.608 | 2.119 | 0.691 | 0.808 | Imputed   |
| rs189133917 | 10:18704950_G/A            | 0.022 | 1.000 | 1.073 | 0.757 | 1.523 | 0.691 | 0.953 | Imputed   |
| rs140589089 | 10:18522332_G/T            | 0.003 | 1.000 | 1.238 | 0.431 | 3.554 | 0.692 | 0.735 | Imputed   |
| rs138004338 | 10:18587223_G/A            | 0.003 | 1.000 | 0.821 | 0.310 | 2.176 | 0.692 | 0.800 | Imputed   |
| rs186420066 | 10:18586478_C/A            | 0.003 | 1.000 | 0.821 | 0.310 | 2.174 | 0.692 | 0.797 | Imputed   |
| rs72355564  | 10:18703412_CTTTTTTTTTTT/C | 0.558 | 0.045 | 1.022 | 0.919 | 1.136 | 0.692 | 0.910 | Imputed   |
| rs79167578  | 10:18481785_C/A            | 0.009 | 1.000 | 1.135 | 0.606 | 2.124 | 0.693 | 0.697 | Imputed   |
| rs36055159  | 10:18524652_A/G            | 0.273 | 0.000 | 0.976 | 0.865 | 1.101 | 0.693 | 0.836 | Imputed   |
| rs117570391 | 10:18590272_C/T            | 0.016 | 0.595 | 1.087 | 0.718 | 1.646 | 0.693 | 0.897 | Imputed   |
| rs1277746   | 10:18519994_A/G            | 0.630 | 0.084 | 0.980 | 0.885 | 1.085 | 0.694 | 0.999 | Imputed   |
| rs11326102  | 10:18636486_CT/C           | 0.406 | 0.094 | 1.022 | 0.918 | 1.136 | 0.694 | 0.923 | Imputed   |
| rs4453118   | 10:18632799_A/G            | 0.225 | 0.035 | 1.025 | 0.905 | 1.161 | 0.695 | 0.914 | Imputed   |
| rs17679683  | 10:18483672_C/T            | 0.086 | 0.592 | 1.038 | 0.862 | 1.251 | 0.695 | 0.901 | Imputed   |
| rs11013421  | 10:18588285_A/G            | 0.244 | 0.966 | 1.024 | 0.911 | 1.150 | 0.695 | 0.999 | Genotyped |
| rs7089228   | 10:18585219_A/G            | 0.362 | 0.046 | 1.022 | 0.915 | 1.142 | 0.695 | 0.882 | Imputed   |
| rs1277745   | 10:18519641_A/G            | 0.630 | 0.084 | 0.980 | 0.885 | 1.085 | 0.696 | 0.999 | Imputed   |
| rs10764583  | 10:18833812_T/C            | 0.414 | 0.537 | 1.021 | 0.921 | 1.131 | 0.696 | 0.998 | Imputed   |
| 10:18854161 | 10:18854161_A/G            | 0.002 | 1.000 | 1.295 | 0.352 | 4.759 | 0.697 | 0.710 | Imputed   |
| rs11396471  | 10:18603045_G/GT           | 0.512 | 0.255 | 0.979 | 0.880 | 1.090 | 0.697 | 0.889 | Imputed   |

## SUPPLEMENTARY DATA

|             |                             |       |       |       |       |       |       |       |           |
|-------------|-----------------------------|-------|-------|-------|-------|-------|-------|-------|-----------|
| rs16917357  | 10:18734013_T/C             | 0.041 | 0.549 | 0.951 | 0.738 | 1.225 | 0.698 | 0.966 | Imputed   |
| rs79253631  | 10:18694223_A/G             | 0.020 | 1.000 | 1.079 | 0.735 | 1.585 | 0.698 | 0.862 | Imputed   |
| rs188186436 | 10:18648261_C/T             | 0.009 | 1.000 | 1.112 | 0.650 | 1.902 | 0.698 | 0.896 | Imputed   |
| rs192263682 | 10:18887772_G/C             | 0.018 | 1.000 | 0.919 | 0.598 | 1.411 | 0.698 | 0.772 | Imputed   |
| rs114558332 | 10:18606031_C/T             | 0.005 | 1.000 | 0.844 | 0.355 | 2.006 | 0.701 | 0.636 | Imputed   |
| rs117106009 | 10:18395626_G/A             | 0.007 | 0.176 | 0.886 | 0.478 | 1.642 | 0.701 | 0.835 | Imputed   |
| rs140290386 | 10:18562318_CA/C            | 0.107 | 0.001 | 0.967 | 0.815 | 1.148 | 0.702 | 0.863 | Imputed   |
| 10:18842059 | 10:18842059_T/C             | 0.004 | 1.000 | 0.841 | 0.345 | 2.048 | 0.703 | 0.791 | Imputed   |
| rs11013137  | 10:18531619_C/T             | 0.539 | 0.000 | 0.980 | 0.885 | 1.086 | 0.704 | 0.919 | Imputed   |
| rs7098506   | 10:18348597_G/T             | 0.450 | 0.048 | 1.020 | 0.922 | 1.128 | 0.704 | 0.967 | Imputed   |
| 10:18412867 | 10:18412867_C/T             | 0.013 | 0.148 | 1.108 | 0.653 | 1.879 | 0.705 | 0.632 | Imputed   |
| 10:18442492 | 10:18442492_C/CITATTTATTTAT | 0.032 | 0.416 | 1.058 | 0.791 | 1.414 | 0.706 | 0.956 | Imputed   |
| 10:18442492 | 10:18442492_C/CITATTTATTTAT | 0.032 | 0.416 | 1.058 | 0.791 | 1.414 | 0.706 | 0.956 | Imputed   |
| rs138892750 | 10:18442492_C/CITATTTATTTAT | 0.032 | 0.416 | 1.058 | 0.791 | 1.414 | 0.706 | 0.956 | Imputed   |
| rs74117933  | 10:18544923_G/A             | 0.103 | 0.035 | 1.035 | 0.864 | 1.240 | 0.707 | 0.815 | Imputed   |
| rs112088382 | 10:18544441_C/T             | 0.002 | 1.000 | 1.256 | 0.381 | 4.139 | 0.707 | 0.856 | Imputed   |
| rs118187208 | 10:18508085_C/A             | 0.005 | 1.000 | 0.843 | 0.346 | 2.054 | 0.708 | 0.632 | Imputed   |
| 10:18563723 | 10:18563723_C/C/A           | 0.011 | 1.000 | 1.104 | 0.655 | 1.860 | 0.710 | 0.856 | Imputed   |
| rs190237515 | 10:18362708_C/T             | 0.001 | 1.000 | 1.279 | 0.349 | 4.686 | 0.711 | 0.957 | Imputed   |
| rs117141756 | 10:18759699_C/T             | 0.012 | 0.383 | 1.094 | 0.679 | 1.765 | 0.712 | 0.884 | Imputed   |
| rs112777036 | 10:18793583_C/T             | 0.101 | 0.027 | 0.967 | 0.811 | 1.154 | 0.712 | 0.876 | Imputed   |
| rs72787951  | 10:18837656_T/C             | 0.414 | 0.495 | 1.019 | 0.920 | 1.129 | 0.712 | 0.999 | Imputed   |
| rs3817494   | 10:18837285_T/C             | 0.414 | 0.495 | 1.019 | 0.920 | 1.129 | 0.712 | 1.000 | Genotyped |
| rs2488140   | 10:18338686_A/G             | 0.284 | 0.228 | 0.980 | 0.878 | 1.093 | 0.713 | 1.000 | Genotyped |
| rs116283256 | 10:18859992_C/G             | 0.140 | 0.187 | 1.029 | 0.882 | 1.201 | 0.713 | 0.894 | Imputed   |
| rs7909119   | 10:18427984_G/A             | 0.260 | 0.174 | 0.979 | 0.873 | 1.097 | 0.713 | 0.975 | Imputed   |
| rs3900648   | 10:18460025_G/A             | 0.058 | 0.112 | 0.961 | 0.777 | 1.188 | 0.714 | 0.990 | Imputed   |
| rs190365108 | 10:18426471_CA/C            | 0.027 | 0.366 | 1.059 | 0.778 | 1.443 | 0.714 | 0.989 | Imputed   |
| rs199504195 | 10:18426471_CA/C            | 0.027 | 0.366 | 1.059 | 0.778 | 1.443 | 0.714 | 0.989 | Imputed   |
| rs12570585  | 10:18847859_C/A             | 0.591 | 0.870 | 1.019 | 0.920 | 1.130 | 0.714 | 0.982 | Imputed   |
| rs2488142   | 10:18339072_T/A             | 0.284 | 0.228 | 0.980 | 0.878 | 1.093 | 0.715 | 0.998 | Imputed   |
| rs10828333  | 10:18526796_A/G             | 0.500 | 0.001 | 0.982 | 0.888 | 1.085 | 0.715 | 0.952 | Imputed   |
| rs2488143   | 10:18339103_A/C             | 0.284 | 0.228 | 0.980 | 0.878 | 1.093 | 0.715 | 0.998 | Imputed   |
| rs113563136 | 10:18361763_G/T             | 0.006 | 1.000 | 1.159 | 0.524 | 2.566 | 0.716 | 0.657 | Imputed   |
| rs76875326  | 10:18745800_A/G             | 0.043 | 0.444 | 0.955 | 0.745 | 1.224 | 0.717 | 0.966 | Imputed   |
| rs1360459   | 10:18465496_T/A             | 0.112 | 0.097 | 1.030 | 0.877 | 1.211 | 0.717 | 0.977 | Imputed   |
| rs3908476   | 10:18722759_T/A             | 0.025 | 0.255 | 0.936 | 0.655 | 1.339 | 0.717 | 0.773 | Imputed   |
| rs2497791   | 10:18340587_C/T             | 0.283 | 0.228 | 0.980 | 0.878 | 1.094 | 0.717 | 0.993 | Imputed   |
| rs1936442   | 10:18512174_A/G             | 0.760 | 0.528 | 0.979 | 0.871 | 1.100 | 0.718 | 0.994 | Imputed   |
| rs7083127   | 10:18631445_A/G             | 0.677 | 0.078 | 1.021 | 0.914 | 1.140 | 0.718 | 0.931 | Imputed   |
| rs74452900  | 10:18568626_G/T             | 0.071 | 0.037 | 0.963 | 0.786 | 1.181 | 0.718 | 0.895 | Imputed   |
| rs114959619 | 10:18846760_G/C             | 0.413 | 0.495 | 1.019 | 0.919 | 1.130 | 0.719 | 0.978 | Imputed   |
| rs12772058  | 10:18800411_C/T             | 0.141 | 0.100 | 1.028 | 0.885 | 1.193 | 0.719 | 0.960 | Imputed   |
| rs12572034  | 10:18850126_T/C             | 0.413 | 0.495 | 1.019 | 0.919 | 1.131 | 0.719 | 0.968 | Imputed   |
| rs200413334 | 10:18850434_T/G             | 0.413 | 0.495 | 1.019 | 0.918 | 1.131 | 0.719 | 0.967 | Imputed   |
| rs12572024  | 10:18850072_T/G             | 0.413 | 0.495 | 1.019 | 0.919 | 1.131 | 0.719 | 0.968 | Imputed   |
| rs7101269   | 10:18846578_A/G             | 0.591 | 0.870 | 1.019 | 0.919 | 1.129 | 0.719 | 0.984 | Imputed   |
| rs7080903   | 10:18846312_G/A             | 0.591 | 0.870 | 1.019 | 0.919 | 1.129 | 0.719 | 0.985 | Imputed   |
| rs116153574 | 10:18848369_C/T             | 0.591 | 0.870 | 1.019 | 0.919 | 1.130 | 0.719 | 0.982 | Imputed   |
| rs28971465  | 10:18849088_G/T             | 0.591 | 0.870 | 1.019 | 0.919 | 1.130 | 0.720 | 0.981 | Imputed   |
| rs4748495   | 10:18906876_T/C             | 0.564 | 0.260 | 1.019 | 0.919 | 1.129 | 0.720 | 0.967 | Imputed   |
| rs12572404  | 10:18456526_A/C             | 0.173 | 0.740 | 0.976 | 0.854 | 1.115 | 0.720 | 0.989 | Imputed   |
| 10:18656055 | 10:18656055_AT/A            | 0.009 | 1.000 | 0.892 | 0.479 | 1.664 | 0.720 | 0.747 | Imputed   |
| rs201439618 | 10:18850488_T/C             | 0.413 | 0.495 | 1.019 | 0.918 | 1.131 | 0.721 | 0.966 | Imputed   |
| rs34853500  | 10:18341991_GA/G            | 0.283 | 0.228 | 0.980 | 0.878 | 1.094 | 0.721 | 0.990 | Imputed   |
| rs72784245  | 10:18589303_T/A             | 0.014 | 0.114 | 1.086 | 0.692 | 1.703 | 0.721 | 0.896 | Imputed   |
| rs114617683 | 10:18844773_A/G             | 0.591 | 0.870 | 1.019 | 0.919 | 1.129 | 0.721 | 0.986 | Imputed   |
| rs7071192   | 10:18846206_T/C             | 0.591 | 0.870 | 1.019 | 0.919 | 1.129 | 0.721 | 0.984 | Imputed   |
| rs2068707   | 10:18578682_C/T             | 0.002 | 1.000 | 1.278 | 0.331 | 4.945 | 0.722 | 0.769 | Imputed   |
| rs1277844   | 10:18635056_G/T             | 0.523 | 0.392 | 0.981 | 0.883 | 1.090 | 0.723 | 0.928 | Imputed   |
| rs77973690  | 10:18748368_A/G             | 0.041 | 0.397 | 0.955 | 0.739 | 1.234 | 0.723 | 0.952 | Imputed   |
| rs371994445 | 10:18514959_CT/C            | 0.069 | 0.796 | 0.964 | 0.786 | 1.182 | 0.724 | 0.932 | Imputed   |
| 10:18495627 | 10:18495627_C/G             | 0.001 | 1.000 | 1.319 | 0.284 | 6.118 | 0.724 | 0.770 | Imputed   |
| rs11013691  | 10:18625399_T/C             | 0.145 | 0.550 | 0.973 | 0.838 | 1.131 | 0.724 | 0.916 | Imputed   |
| rs2488147   | 10:18342241_G/C             | 0.284 | 0.228 | 0.980 | 0.878 | 1.094 | 0.725 | 0.991 | Imputed   |
| rs11013320  | 10:18571506_G/C             | 0.643 | 0.214 | 0.981 | 0.881 | 1.092 | 0.725 | 0.948 | Imputed   |
| rs2497794   | 10:18342212_C/T             | 0.284 | 0.228 | 0.980 | 0.878 | 1.094 | 0.725 | 0.991 | Imputed   |
| rs74229403  | 10:18455471_C/T             | 0.058 | 0.112 | 0.963 | 0.779 | 1.190 | 0.725 | 0.991 | Imputed   |
| rs189161757 | 10:18719177_G/A             | 0.002 | 1.000 | 1.251 | 0.358 | 4.366 | 0.726 | 0.810 | Imputed   |
| rs1760594   | 10:18471064_C/T             | 0.041 | 0.507 | 1.058 | 0.771 | 1.453 | 0.726 | 0.640 | Imputed   |
| rs2488146   | 10:18342214_T/C             | 0.284 | 0.228 | 0.981 | 0.878 | 1.095 | 0.726 | 0.991 | Imputed   |
| rs6482385   | 10:18688883_C/T             | 0.541 | 0.033 | 0.982 | 0.888 | 1.087 | 0.726 | 0.965 | Imputed   |
| rs181482305 | 10:18572565_C/T             | 0.004 | 1.000 | 1.151 | 0.522 | 2.537 | 0.728 | 0.941 | Imputed   |
| rs115680692 | 10:18854517_C/T             | 0.412 | 0.515 | 1.019 | 0.918 | 1.131 | 0.728 | 0.959 | Imputed   |
| rs11595997  | 10:18348548_T/C             | 0.451 | 0.051 | 1.018 | 0.920 | 1.126 | 0.728 | 0.964 | Imputed   |
| rs62634837  | 10:18854881_T/C             | 0.412 | 0.515 | 1.019 | 0.917 | 1.131 | 0.728 | 0.957 | Imputed   |
| rs71507265  | 10:18569144_ATTACAT/A       | 0.400 | 0.114 | 0.982 | 0.887 | 1.087 | 0.728 | 0.990 | Imputed   |
| rs76676593  | 10:18796133_T/C             | 0.170 | 0.054 | 0.976 | 0.851 | 1.120 | 0.729 | 0.933 | Imputed   |
| rs62634838  | 10:18854884_C/T             | 0.412 | 0.515 | 1.019 | 0.917 | 1.131 | 0.729 | 0.958 | Imputed   |
| rs77138979  | 10:18462388_G/A             | 0.031 | 1.000 | 0.949 | 0.705 | 1.277 | 0.729 | 0.935 | Imputed   |
| 10:18565698 | 10:18565698_G/A             | 0.006 | 1.000 | 0.887 | 0.449 | 1.753 | 0.730 | 0.871 | Imputed   |
| rs12411638  | 10:18463338_C/T             | 0.108 | 1.000 | 1.029 | 0.875 | 1.210 | 0.730 | 0.980 | Imputed   |
| rs191152931 | 10:18893543_T/C             | 0.011 | 1.000 | 0.915 | 0.552 | 1.517 | 0.731 | 0.887 | Imputed   |
| rs140017953 | 10:18463323_TTCTC/T         | 0.108 | 1.000 | 1.029 | 0.875 | 1.210 | 0.731 | 0.980 | Imputed   |
| rs73597550  | 10:18524627_T/A             | 0.008 | 1.000 | 1.136 | 0.548 | 2.353 | 0.731 | 0.636 | Imputed   |
| rs56410858  | 10:18875337_C/G             | 0.409 | 0.896 | 1.019 | 0.916 | 1.133 | 0.732 | 0.933 | Imputed   |
| rs140683324 | 10:18841299_AAC/A           | 0.170 | 0.286 | 0.977 | 0.855 | 1.116 | 0.732 | 0.991 | Imputed   |
| rs112873694 | 10:18655806_A/AT            | 0.023 | 0.445 | 1.061 | 0.755 | 1.491 | 0.733 | 0.922 | Imputed   |
| rs28756165  | 10:18574829_T/A             | 0.280 | 0.004 | 1.020 | 0.908 | 1.146 | 0.733 | 0.909 | Imputed   |
| rs1757200   | 10:18529835_T/C             | 0.797 | 0.002 | 0.978 | 0.861 | 1.111 | 0.733 | 0.911 | Imputed   |
| rs113391868 | 10:18374001_T/A             | 0.167 | 0.078 | 0.977 | 0.852 | 1.120 | 0.735 | 0.941 | Imputed   |
| rs7070582   | 10:18755942_G/T             | 0.384 | 0.101 | 0.982 | 0.883 | 1.092 | 0.736 | 0.934 | Imputed   |

## SUPPLEMENTARY DATA

|             |                      |       |       |       |       |       |       |       |           |
|-------------|----------------------|-------|-------|-------|-------|-------|-------|-------|-----------|
| rs201740142 | 10:18369839_CA/C     | 0.006 | 1.000 | 1.149 | 0.512 | 2.578 | 0.736 | 0.647 | Imputed   |
| rs141577769 | 10:18343563_G/GCGAA  | 0.284 | 0.228 | 0.981 | 0.879 | 1.096 | 0.737 | 0.987 | Imputed   |
| rs9633626   | 10:18565634_A/G      | 0.403 | 0.115 | 0.983 | 0.888 | 1.087 | 0.737 | 0.996 | Imputed   |
| rs10828387  | 10:18547783_T/A      | 0.523 | 0.029 | 1.017 | 0.921 | 1.123 | 0.738 | 0.985 | Imputed   |
| rs118053049 | 10:18413289_A/G      | 0.028 | 0.771 | 0.949 | 0.698 | 1.291 | 0.738 | 0.966 | Imputed   |
| rs6482515   | 10:18827828_C/T      | 0.346 | 0.401 | 0.982 | 0.884 | 1.091 | 0.739 | 0.999 | Genotyped |
| rs144550477 | 10:18842413_G/A      | 0.036 | 0.483 | 1.055 | 0.772 | 1.442 | 0.739 | 0.749 | Imputed   |
| rs142860912 | 10:18842415_A/C      | 0.036 | 0.483 | 1.055 | 0.772 | 1.442 | 0.739 | 0.749 | Imputed   |
| rs140397060 | 10:18859719_T/G      | 0.042 | 0.463 | 0.954 | 0.722 | 1.260 | 0.739 | 0.788 | Imputed   |
| 10:18859724 | 10:18859724_A/C      | 0.042 | 0.463 | 0.954 | 0.722 | 1.260 | 0.739 | 0.788 | Imputed   |
| rs55857419  | 10:18598390_T/G      | 0.105 | 0.204 | 0.971 | 0.816 | 1.155 | 0.739 | 0.870 | Imputed   |
| 10:18726990 | 10:18726990_A/G      | 0.001 | 1.000 | 1.316 | 0.261 | 6.628 | 0.739 | 0.779 | Imputed   |
| rs12777217  | 10:18565705_G/A      | 0.401 | 0.114 | 0.983 | 0.889 | 1.088 | 0.739 | 0.998 | Imputed   |
| rs146494104 | 10:18385967_T/C      | 0.002 | 1.000 | 0.766 | 0.160 | 3.673 | 0.739 | 0.600 | Imputed   |
| rs10764440  | 10:18649635_G/A      | 0.591 | 0.794 | 0.983 | 0.888 | 1.088 | 0.739 | 1.000 | Genotyped |
| rs144936401 | 10:18664382_A/T      | 0.002 | 1.000 | 1.232 | 0.359 | 4.227 | 0.740 | 0.709 | Imputed   |
| rs80262246  | 10:18406886_T/C      | 0.181 | 0.524 | 0.978 | 0.856 | 1.117 | 0.740 | 0.946 | Imputed   |
| rs2488144   | 10:18340544_A/T      | 0.287 | 0.082 | 0.982 | 0.880 | 1.095 | 0.741 | 0.989 | Imputed   |
| rs61842422  | 10:18401525_A/G      | 0.182 | 0.337 | 0.978 | 0.856 | 1.117 | 0.742 | 0.940 | Imputed   |
| rs142671534 | 10:18692318_T/C      | 0.002 | 1.000 | 0.790 | 0.194 | 3.220 | 0.742 | 0.820 | Imputed   |
| 10:18509150 | 10:18509150_A/G      | 0.049 | 0.174 | 0.960 | 0.751 | 1.227 | 0.742 | 0.861 | Imputed   |
| rs191386905 | 10:18762872_C/G      | 0.013 | 0.438 | 1.081 | 0.681 | 1.714 | 0.742 | 0.956 | Imputed   |
| rs76932265  | 10:18732142_G/A      | 0.040 | 0.533 | 0.958 | 0.742 | 1.238 | 0.744 | 0.971 | Imputed   |
| rs11458222  | 10:18660138_G/GTT    | 0.023 | 0.448 | 1.058 | 0.754 | 1.485 | 0.744 | 0.932 | Imputed   |
| rs58519066  | 10:18638655_T/TA     | 0.390 | 0.127 | 1.018 | 0.914 | 1.133 | 0.744 | 0.915 | Imputed   |
| rs17684025  | 10:18657334_A/C      | 0.023 | 0.445 | 1.058 | 0.753 | 1.486 | 0.745 | 0.935 | Imputed   |
| rs16917121  | 10:18555987_C/G      | 0.089 | 0.064 | 1.032 | 0.852 | 1.250 | 0.745 | 0.844 | Imputed   |
| rs5783590   | 10:18519772_CT/C     | 0.631 | 0.084 | 0.983 | 0.887 | 1.089 | 0.745 | 0.993 | Imputed   |
| rs80050119  | 10:18513286_A/G      | 0.005 | 1.000 | 0.869 | 0.373 | 2.026 | 0.745 | 0.742 | Imputed   |
| rs150016360 | 10:18714996_A/G      | 0.003 | 1.000 | 1.176 | 0.442 | 3.127 | 0.746 | 0.936 | Imputed   |
| rs17611161  | 10:18661677_T/G      | 0.023 | 0.464 | 1.057 | 0.754 | 1.483 | 0.746 | 0.935 | Imputed   |
| rs117505686 | 10:18900800_C/T      | 0.003 | 1.000 | 1.193 | 0.410 | 3.468 | 0.746 | 0.783 | Imputed   |
| rs1757236   | 10:18527454_A/G      | 0.142 | 0.002 | 0.975 | 0.837 | 1.136 | 0.747 | 0.869 | Imputed   |
| rs11814504  | 10:18606656_A/G      | 0.006 | 1.000 | 0.869 | 0.370 | 2.039 | 0.747 | 0.603 | Imputed   |
| rs77378663  | 10:18732515_T/C      | 0.040 | 0.533 | 0.959 | 0.742 | 1.239 | 0.747 | 0.973 | Imputed   |
| 10:18443221 | 10:18443221_T/A      | 0.003 | 1.000 | 0.847 | 0.308 | 2.329 | 0.747 | 0.850 | Imputed   |
| rs1891393   | 10:18427430_T/C      | 0.406 | 0.280 | 0.984 | 0.889 | 1.088 | 0.748 | 1.000 | Genotyped |
| rs11013317  | 10:18571411_A/G      | 0.644 | 0.201 | 0.983 | 0.883 | 1.094 | 0.748 | 0.950 | Imputed   |
| rs191987873 | 10:18808369_A/G      | 0.016 | 1.000 | 1.080 | 0.676 | 1.725 | 0.748 | 0.721 | Imputed   |
| rs144480471 | 10:18632856_T/TAATA  | 0.002 | 1.000 | 1.189 | 0.412 | 3.427 | 0.749 | 0.886 | Imputed   |
| rs111911289 | 10:18661537_T/A      | 0.023 | 0.464 | 1.057 | 0.753 | 1.482 | 0.749 | 0.937 | Imputed   |
| rs181556164 | 10:18512097_A/G      | 0.004 | 1.000 | 0.851 | 0.316 | 2.290 | 0.750 | 0.665 | Imputed   |
| rs1779229   | 10:18529419_A/G      | 0.728 | 0.003 | 0.981 | 0.871 | 1.104 | 0.751 | 0.895 | Imputed   |
| rs11013723  | 10:18632601_A/G      | 0.084 | 0.004 | 0.969 | 0.800 | 1.175 | 0.752 | 0.853 | Imputed   |
| rs7082483   | 10:18525036_C/T      | 0.022 | 0.046 | 0.936 | 0.622 | 1.408 | 0.752 | 0.722 | Imputed   |
| rs143177284 | 10:18757821_C/T      | 0.001 | 1.000 | 1.298 | 0.257 | 6.558 | 0.752 | 0.789 | Imputed   |
| rs7088280   | 10:18348695_A/G      | 0.497 | 0.062 | 0.984 | 0.889 | 1.089 | 0.752 | 0.950 | Imputed   |
| rs141510505 | 10:18829113_G/GCTGA  | 0.159 | 0.016 | 0.977 | 0.848 | 1.126 | 0.752 | 0.937 | Imputed   |
| rs145488243 | 10:18477153_T/TTGCC  | 0.111 | 0.094 | 1.027 | 0.871 | 1.210 | 0.753 | 0.960 | Imputed   |
| rs2400      | 10:18460367_A/G      | 0.103 | 0.201 | 1.027 | 0.870 | 1.212 | 0.753 | 0.992 | Imputed   |
| rs193286750 | 10:18508857_G/A      | 0.002 | 1.000 | 0.805 | 0.208 | 3.119 | 0.753 | 0.905 | Imputed   |
| rs11013319  | 10:18571488_G/A      | 0.643 | 0.201 | 0.983 | 0.883 | 1.094 | 0.753 | 0.949 | Imputed   |
| rs370866347 | 10:18801386_TTC/T    | 0.173 | 0.616 | 0.979 | 0.856 | 1.119 | 0.753 | 0.986 | Imputed   |
| rs1757234   | 10:18526451_G/A      | 0.109 | 0.038 | 0.973 | 0.817 | 1.157 | 0.753 | 0.848 | Imputed   |
| rs79606845  | 10:18623479_T/A      | 0.044 | 0.097 | 0.959 | 0.739 | 1.245 | 0.754 | 0.851 | Imputed   |
| 10:18460517 | 10:18460517_A/T      | 0.013 | 1.000 | 1.091 | 0.632 | 1.885 | 0.754 | 0.667 | Imputed   |
| rs66498614  | 10:18517670_A/T      | 0.799 | 0.008 | 0.980 | 0.866 | 1.110 | 0.755 | 0.976 | Imputed   |
| rs7098242   | 10:18526110_T/C      | 0.499 | 0.001 | 0.984 | 0.891 | 1.088 | 0.756 | 0.957 | Imputed   |
| rs2488155   | 10:18361329_T/G      | 0.696 | 0.737 | 1.017 | 0.913 | 1.133 | 0.756 | 1.000 | Genotyped |
| rs2488154   | 10:18360306_C/A      | 0.696 | 0.682 | 1.017 | 0.913 | 1.133 | 0.757 | 0.996 | Imputed   |
| rs1917823   | 10:18817113_G/A      | 0.799 | 1.000 | 1.021 | 0.897 | 1.160 | 0.757 | 0.948 | Imputed   |
| rs7909887   | 10:18417847_G/A      | 0.028 | 0.532 | 1.050 | 0.772 | 1.428 | 0.757 | 0.962 | Imputed   |
| rs16917369  | 10:18737870_G/C      | 0.040 | 0.533 | 0.961 | 0.744 | 1.240 | 0.757 | 0.980 | Imputed   |
| rs147808414 | 10:18592154_A/G      | 0.004 | 1.000 | 0.857 | 0.321 | 2.289 | 0.757 | 0.715 | Imputed   |
| rs58941357  | 10:18674591_T/A      | 0.517 | 0.950 | 0.984 | 0.889 | 1.090 | 0.758 | 0.974 | Imputed   |
| rs57831826  | 10:18422410_T/G      | 0.191 | 0.919 | 0.980 | 0.862 | 1.114 | 0.758 | 0.982 | Imputed   |
| rs191117556 | 10:18424373_G/A      | 0.002 | 1.000 | 1.207 | 0.365 | 3.985 | 0.758 | 0.945 | Imputed   |
| rs148088051 | 10:18509447_T/C      | 0.009 | 1.000 | 0.917 | 0.530 | 1.588 | 0.758 | 0.948 | Imputed   |
| rs79917876  | 10:18738607_C/T      | 0.040 | 0.413 | 0.961 | 0.744 | 1.240 | 0.759 | 0.981 | Imputed   |
| rs186749756 | 10:18735769_G/C      | 0.003 | 1.000 | 1.165 | 0.438 | 3.102 | 0.759 | 0.942 | Imputed   |
| rs77599739  | 10:18673228_C/T      | 0.023 | 0.461 | 1.054 | 0.754 | 1.473 | 0.760 | 0.955 | Imputed   |
| rs2488141   | 10:18338971_A/C      | 0.284 | 0.228 | 0.983 | 0.881 | 1.097 | 0.761 | 0.998 | Imputed   |
| rs7076100   | 10:18759537_T/A      | 0.433 | 0.053 | 1.016 | 0.918 | 1.124 | 0.761 | 0.976 | Imputed   |
| rs74120207  | 10:18361051_G/T      | 0.026 | 1.000 | 1.058 | 0.736 | 1.522 | 0.761 | 0.762 | Imputed   |
| rs1757214   | 10:18534850_G/A      | 0.198 | 0.000 | 0.979 | 0.857 | 1.120 | 0.761 | 0.855 | Imputed   |
| rs35916435  | 10:18677739_CT/C     | 0.113 | 0.265 | 0.975 | 0.830 | 1.146 | 0.761 | 0.939 | Imputed   |
| rs75538584  | 10:18470109_A/G      | 0.013 | 1.000 | 0.934 | 0.599 | 1.456 | 0.762 | 0.967 | Imputed   |
| rs11013835  | 10:18650587_G/A      | 0.518 | 0.950 | 1.016 | 0.918 | 1.124 | 0.763 | 0.983 | Imputed   |
| rs117733592 | 10:18468557_T/C      | 0.013 | 1.000 | 0.934 | 0.599 | 1.456 | 0.763 | 0.968 | Imputed   |
| rs61842437  | 10:18428102_G/A      | 0.181 | 0.556 | 0.980 | 0.860 | 1.117 | 0.764 | 0.993 | Imputed   |
| rs115086036 | 10:18845179_T/C      | 0.169 | 0.285 | 0.980 | 0.857 | 1.120 | 0.765 | 0.988 | Imputed   |
| rs146705177 | 10:18769200_A/AT     | 0.479 | 0.800 | 0.985 | 0.890 | 1.089 | 0.765 | 0.974 | Imputed   |
| rs55822580  | 10:18429383_C/T      | 0.182 | 0.593 | 0.980 | 0.860 | 1.117 | 0.765 | 0.989 | Imputed   |
| 10:18848411 | 10:18848411_A/AGAATG | 0.168 | 0.398 | 0.980 | 0.855 | 1.122 | 0.765 | 0.972 | Imputed   |
| rs6482172   | 10:18377366_C/T      | 0.771 | 0.048 | 1.019 | 0.898 | 1.157 | 0.765 | 0.885 | Imputed   |
| rs12780039  | 10:18678987_G/C      | 0.112 | 0.630 | 0.976 | 0.830 | 1.147 | 0.766 | 0.949 | Imputed   |
| 10:18666501 | 10:18666501_C/T      | 0.021 | 0.408 | 0.947 | 0.660 | 1.358 | 0.766 | 0.961 | Imputed   |
| rs2497806   | 10:18358259_T/C      | 0.674 | 0.540 | 1.016 | 0.913 | 1.132 | 0.767 | 0.972 | Imputed   |
| rs111512190 | 10:18471553_C/T      | 0.111 | 0.097 | 1.025 | 0.871 | 1.205 | 0.767 | 0.977 | Imputed   |
| rs61842432  | 10:18425599_G/A      | 0.181 | 0.556 | 0.980 | 0.860 | 1.118 | 0.767 | 0.993 | Imputed   |
| rs12358055  | 10:18687297_C/T      | 0.380 | 0.019 | 0.985 | 0.889 | 1.091 | 0.768 | 0.977 | Imputed   |
| rs2497807   | 10:18358508_G/A      | 0.692 | 0.657 | 1.016 | 0.912 | 1.132 | 0.768 | 0.987 | Imputed   |

SUPPLEMENTARY DATA

|             |                                |       |       |       |       |       |       |       |           |
|-------------|--------------------------------|-------|-------|-------|-------|-------|-------|-------|-----------|
| rs11014301  | 10:18743645_G/A                | 0.024 | 0.233 | 0.947 | 0.661 | 1.358 | 0.768 | 0.798 | Imputed   |
| rs77868870  | 10:18471002_G/A                | 0.013 | 1.000 | 0.935 | 0.598 | 1.462 | 0.769 | 0.958 | Imputed   |
| rs10741101  | 10:18823639_T/C                | 0.515 | 0.569 | 1.015 | 0.919 | 1.122 | 0.769 | 0.991 | Imputed   |
| rs74325916  | 10:18470170_A/G                | 0.013 | 1.000 | 0.936 | 0.600 | 1.460 | 0.769 | 0.965 | Imputed   |
| rs76199682  | 10:18814756_T/C                | 0.196 | 0.839 | 0.981 | 0.863 | 1.115 | 0.770 | 0.976 | Imputed   |
| rs142363955 | 10:18861459_ATTCCATTCCATT/A    | 0.177 | 0.869 | 0.980 | 0.854 | 1.124 | 0.770 | 0.918 | Imputed   |
| rs12241085  | 10:18538669_C/G                | 0.494 | 0.000 | 1.015 | 0.917 | 1.124 | 0.770 | 0.921 | Imputed   |
| rs74600292  | 10:18890365_T/G                | 0.009 | 1.000 | 0.913 | 0.496 | 1.680 | 0.770 | 0.713 | Imputed   |
| rs2497805   | 10:18358008_A/C                | 0.695 | 0.823 | 1.016 | 0.912 | 1.133 | 0.770 | 0.990 | Imputed   |
| rs74120203  | 10:18356898_G/A                | 0.007 | 1.000 | 1.117 | 0.530 | 2.358 | 0.771 | 0.656 | Imputed   |
| rs35255031  | 10:18736145_TA/T               | 0.161 | 0.000 | 1.021 | 0.885 | 1.178 | 0.774 | 0.889 | Imputed   |
| rs74618636  | 10:18742489_C/T                | 0.053 | 0.622 | 0.967 | 0.770 | 1.215 | 0.774 | 0.971 | Imputed   |
| rs2068356   | 10:18449161_G/A                | 0.109 | 0.808 | 1.024 | 0.872 | 1.202 | 0.774 | 0.992 | Imputed   |
| rs112264441 | 10:18336696_C/T                | 0.009 | 1.000 | 1.090 | 0.605 | 1.965 | 0.774 | 0.799 | Imputed   |
| rs11013738  | 10:18634862_T/C                | 0.007 | 1.000 | 1.112 | 0.537 | 2.302 | 0.774 | 0.683 | Imputed   |
| rs74494383  | 10:18626340_C/A                | 0.011 | 1.000 | 0.917 | 0.507 | 1.660 | 0.775 | 0.650 | Imputed   |
| rs201389972 | 10:18859638_T/C                | 0.177 | 0.869 | 0.980 | 0.854 | 1.125 | 0.775 | 0.919 | Imputed   |
| rs7080574   | 10:18788342_G/C                | 0.319 | 0.000 | 1.018 | 0.901 | 1.151 | 0.776 | 0.762 | Imputed   |
| rs4748490   | 10:18863630_C/T                | 0.177 | 0.912 | 0.980 | 0.854 | 1.125 | 0.776 | 0.912 | Imputed   |
| rs5783596   | 10:18640079_CT/C               | 0.641 | 0.014 | 0.984 | 0.881 | 1.100 | 0.776 | 0.889 | Imputed   |
| rs183421033 | 10:18919706_A/G                | 0.008 | 1.000 | 1.095 | 0.585 | 2.050 | 0.777 | 0.758 | Imputed   |
| rs185135376 | 10:18784740_A/G                | 0.012 | 1.000 | 0.930 | 0.562 | 1.539 | 0.777 | 0.854 | Imputed   |
| rs12772624  | 10:18566032_C/T                | 0.076 | 0.058 | 0.972 | 0.801 | 1.181 | 0.777 | 0.933 | Imputed   |
| 10:18528968 | 10:18528968_T/A                | 0.002 | 1.000 | 0.826 | 0.219 | 3.117 | 0.778 | 0.716 | Imputed   |
| rs150813992 | 10:18363367_G/A                | 0.005 | 1.000 | 0.886 | 0.382 | 2.058 | 0.779 | 0.636 | Imputed   |
| rs58142633  | 10:18357785_G/T                | 0.007 | 1.000 | 1.112 | 0.528 | 2.340 | 0.780 | 0.664 | Imputed   |
| rs4418698   | 10:18763854_G/A                | 0.479 | 0.899 | 0.986 | 0.892 | 1.089 | 0.780 | 1.000 | Genotyped |
| rs141657163 | 10:18710519_G/A                | 0.013 | 1.000 | 1.077 | 0.638 | 1.819 | 0.781 | 0.706 | Imputed   |
| rs12767546  | 10:18840919_T/A                | 0.347 | 0.463 | 0.985 | 0.887 | 1.095 | 0.781 | 0.990 | Imputed   |
| rs58055243  | 10:18429193_G/C                | 0.182 | 0.630 | 0.982 | 0.861 | 1.119 | 0.782 | 0.986 | Imputed   |
| rs9633647   | 10:18565470_C/A                | 0.402 | 0.148 | 0.986 | 0.891 | 1.091 | 0.782 | 1.000 | Genotyped |
| rs77670603  | 10:18901089_C/T                | 0.052 | 0.165 | 0.966 | 0.753 | 1.238 | 0.782 | 0.817 | Imputed   |
| 10:18709259 | 10:18709259_C/G                | 0.020 | 0.659 | 1.053 | 0.731 | 1.517 | 0.782 | 0.941 | Imputed   |
| rs2488153   | 10:18357775_A/G                | 0.727 | 0.937 | 0.984 | 0.879 | 1.102 | 0.782 | 0.982 | Imputed   |
| rs112465598 | 10:18362641_CT/C               | 0.558 | 0.000 | 0.985 | 0.882 | 1.099 | 0.782 | 0.823 | Imputed   |
| rs7908738   | 10:18427746_G/C                | 0.185 | 0.156 | 1.018 | 0.896 | 1.157 | 0.783 | 0.985 | Imputed   |
| 10:18913576 | 10:18913576_C/CAAAAAA          | 0.638 | 0.559 | 1.016 | 0.909 | 1.136 | 0.783 | 0.889 | Imputed   |
| rs116259164 | 10:18650745_T/C                | 0.005 | 1.000 | 0.895 | 0.405 | 1.977 | 0.783 | 0.792 | Imputed   |
| rs11013303  | 10:18566622_G/A                | 0.394 | 0.064 | 0.986 | 0.891 | 1.091 | 0.783 | 0.995 | Imputed   |
| rs2497799   | 10:18350019_A/T                | 0.251 | 0.000 | 0.983 | 0.869 | 1.112 | 0.783 | 0.856 | Imputed   |
| rs11014517  | 10:18788413_A/G                | 0.021 | 0.181 | 0.951 | 0.664 | 1.362 | 0.784 | 0.917 | Imputed   |
| rs58225473  | 10:18828635_T/G                | 0.193 | 0.683 | 0.982 | 0.864 | 1.117 | 0.784 | 0.993 | Imputed   |
| rs4748491   | 10:18865534_A/G                | 0.587 | 0.948 | 1.015 | 0.915 | 1.125 | 0.784 | 0.971 | Imputed   |
| rs117509564 | 10:18400213_C/T                | 0.028 | 0.534 | 1.044 | 0.768 | 1.420 | 0.784 | 0.980 | Imputed   |
| rs7921738   | 10:18770076_A/C                | 0.485 | 0.924 | 1.014 | 0.916 | 1.123 | 0.784 | 0.962 | Imputed   |
| rs140566120 | 10:18644921_T/C                | 0.052 | 0.325 | 1.032 | 0.823 | 1.295 | 0.784 | 0.988 | Imputed   |
| rs78724918  | 10:18752117_C/G                | 0.018 | 0.357 | 0.949 | 0.652 | 1.382 | 0.784 | 0.966 | Imputed   |
| rs116996015 | 10:18392633_T/G                | 0.012 | 1.000 | 0.934 | 0.571 | 1.526 | 0.785 | 0.839 | Imputed   |
| rs61842671  | 10:18564858_C/T                | 0.177 | 0.034 | 0.981 | 0.855 | 1.126 | 0.785 | 0.886 | Imputed   |
| rs12777508  | 10:18802554_T/A                | 0.103 | 0.387 | 1.024 | 0.862 | 1.218 | 0.785 | 0.928 | Imputed   |
| rs78169022  | 10:18392878_A/G                | 0.012 | 1.000 | 0.934 | 0.572 | 1.526 | 0.785 | 0.838 | Imputed   |
| rs10741086  | 10:18793956_T/G                | 0.839 | 0.060 | 1.020 | 0.883 | 1.179 | 0.786 | 0.875 | Imputed   |
| rs7082094   | 10:18866005_T/C                | 0.587 | 0.948 | 1.014 | 0.915 | 1.125 | 0.787 | 0.972 | Imputed   |
| rs77757894  | 10:18654275_C/T                | 0.020 | 0.396 | 0.950 | 0.655 | 1.377 | 0.787 | 0.988 | Imputed   |
| rs7091578   | 10:18865935_G/A                | 0.587 | 0.948 | 1.014 | 0.915 | 1.125 | 0.787 | 0.972 | Imputed   |
| rs10828764  | 10:18770653_G/C                | 0.485 | 0.924 | 1.014 | 0.916 | 1.123 | 0.787 | 0.960 | Imputed   |
| rs35685495  | 10:18466772_AG/A               | 0.016 | 1.000 | 0.942 | 0.608 | 1.459 | 0.788 | 0.830 | Imputed   |
| rs7096526   | 10:18770950_C/T                | 0.160 | 0.475 | 1.019 | 0.886 | 1.172 | 0.788 | 0.958 | Imputed   |
| rs7093454   | 10:18886680_A/T                | 0.180 | 0.913 | 0.981 | 0.855 | 1.127 | 0.788 | 0.897 | Imputed   |
| rs78011989  | 10:18473159_C/A                | 0.013 | 1.000 | 0.940 | 0.597 | 1.479 | 0.789 | 0.939 | Imputed   |
| rs115961994 | 10:18847181_A/G                | 0.171 | 0.342 | 0.982 | 0.859 | 1.122 | 0.789 | 0.987 | Imputed   |
| rs143534544 | 10:18804254_CCCTT/C            | 0.172 | 0.578 | 0.982 | 0.859 | 1.122 | 0.789 | 0.996 | Imputed   |
| rs150825509 | 10:18807625_G/A                | 0.002 | 1.000 | 1.164 | 0.382 | 3.543 | 0.789 | 0.798 | Imputed   |
| rs140836479 | 10:18473383_T/C                | 0.013 | 1.000 | 0.940 | 0.597 | 1.480 | 0.790 | 0.937 | Imputed   |
| rs11013304  | 10:18567615_G/A                | 0.077 | 0.122 | 1.028 | 0.839 | 1.259 | 0.790 | 0.859 | Imputed   |
| 10:18811806 | 10:18811806_CAAAAAAAAAAAAAAAAA | 0.669 | 0.003 | 1.016 | 0.905 | 1.140 | 0.790 | 0.847 | Imputed   |
| rs11013305  | 10:18567616_C/A                | 0.077 | 0.122 | 1.028 | 0.839 | 1.259 | 0.791 | 0.859 | Imputed   |
| rs60473856  | 10:18547820_AT/A               | 0.505 | 0.003 | 1.014 | 0.915 | 1.124 | 0.791 | 0.919 | Imputed   |
| rs35592370  | 10:18359948_T/T/C              | 0.689 | 0.606 | 1.015 | 0.911 | 1.131 | 0.791 | 0.985 | Imputed   |
| 10:18602263 | 10:18602263_T/C                | 0.008 | 1.000 | 1.083 | 0.601 | 1.952 | 0.791 | 0.934 | Imputed   |
| rs11013306  | 10:18567693_C/T                | 0.077 | 0.122 | 1.028 | 0.839 | 1.259 | 0.792 | 0.860 | Imputed   |
| rs2489195   | 10:18637838_A/G                | 0.435 | 0.058 | 1.014 | 0.914 | 1.125 | 0.793 | 0.939 | Imputed   |
| rs143060134 | 10:18828191_C/T                | 0.003 | 1.000 | 1.163 | 0.376 | 3.595 | 0.793 | 0.766 | Imputed   |
| rs202017889 | 10:18503033_AG/A               | 0.003 | 1.000 | 1.143 | 0.422 | 3.097 | 0.793 | 0.817 | Imputed   |
| rs190546710 | 10:18380691_A/G                | 0.002 | 1.000 | 1.190 | 0.323 | 4.387 | 0.793 | 0.637 | Imputed   |
| rs79813341  | 10:18509806_G/A                | 0.009 | 0.256 | 0.930 | 0.539 | 1.604 | 0.794 | 0.953 | Imputed   |
| rs189322963 | 10:18589273_T/C                | 0.001 | 1.000 | 1.227 | 0.264 | 5.689 | 0.794 | 0.751 | Imputed   |
| rs7900124   | 10:18427907_T/C                | 0.406 | 0.265 | 0.987 | 0.892 | 1.092 | 0.794 | 0.995 | Imputed   |
| rs16917162  | 10:18593406_A/C                | 0.186 | 0.000 | 0.982 | 0.858 | 1.125 | 0.795 | 0.878 | Imputed   |
| rs74491282  | 10:18591021_A/G                | 0.074 | 0.431 | 0.973 | 0.789 | 1.199 | 0.795 | 0.835 | Imputed   |
| rs111609298 | 10:18707441_A/G                | 0.071 | 1.000 | 0.974 | 0.796 | 1.190 | 0.795 | 0.939 | Imputed   |
| rs12772534  | 10:18866868_C/T                | 0.587 | 0.948 | 1.014 | 0.914 | 1.124 | 0.795 | 0.972 | Imputed   |
| rs78183760  | 10:18700881_T/C                | 0.014 | 0.492 | 0.942 | 0.598 | 1.484 | 0.796 | 0.851 | Imputed   |
| rs112571313 | 10:18757719_G/T                | 0.033 | 0.577 | 0.961 | 0.713 | 1.297 | 0.796 | 0.864 | Imputed   |
| rs2488145   | 10:18341233_A/G                | 0.287 | 0.082 | 0.986 | 0.883 | 1.100 | 0.796 | 0.988 | Imputed   |
| rs7100884   | 10:18812697_A/G                | 0.782 | 0.643 | 1.016 | 0.899 | 1.148 | 0.797 | 0.977 | Imputed   |
| rs151297485 | 10:18502110_CT/C               | 0.003 | 1.000 | 1.139 | 0.421 | 3.086 | 0.797 | 0.817 | Imputed   |
| rs75707966  | 10:18833341_G/A                | 0.171 | 0.342 | 0.983 | 0.861 | 1.122 | 0.798 | 0.994 | Imputed   |
| rs10828834  | 10:18812434_T/C                | 0.782 | 0.643 | 1.016 | 0.899 | 1.148 | 0.798 | 0.977 | Imputed   |
| rs192295235 | 10:18793238_G/A                | 0.001 | 1.000 | 0.800 | 0.145 | 4.410 | 0.798 | 0.678 | Imputed   |
| rs117090315 | 10:18567275_A/G                | 0.024 | 0.000 | 0.954 | 0.667 | 1.366 | 0.798 | 0.789 | Imputed   |

SUPPLEMENTARY DATA

|             |                       |       |       |       |       |       |       |       |         |
|-------------|-----------------------|-------|-------|-------|-------|-------|-------|-------|---------|
| rs11013049  | 10:18507293_A/G       | 0.066 | 0.794 | 1.028 | 0.834 | 1.266 | 0.798 | 0.926 | Imputed |
| rs144422637 | 10:18496295_A/G       | 0.006 | 1.000 | 0.910 | 0.442 | 1.875 | 0.798 | 0.829 | Imputed |
| rs117065711 | 10:18891010_T/G       | 0.052 | 0.075 | 0.968 | 0.756 | 1.240 | 0.799 | 0.811 | Imputed |
| rs7093791   | 10:18623463_A/G       | 0.689 | 0.176 | 1.015 | 0.907 | 1.135 | 0.799 | 0.920 | Imputed |
| rs7085318   | 10:18877157_G/A       | 0.180 | 0.785 | 0.982 | 0.856 | 1.127 | 0.799 | 0.901 | Imputed |
| rs76377192  | 10:18524852_G/A       | 0.006 | 1.000 | 1.106 | 0.509 | 2.406 | 0.799 | 0.781 | Imputed |
| rs45615535  | 10:18830814_A/G       | 0.194 | 0.761 | 0.984 | 0.866 | 1.117 | 0.799 | 0.994 | Imputed |
| rs7907891   | 10:18880902_C/A       | 0.180 | 0.827 | 0.982 | 0.856 | 1.127 | 0.799 | 0.899 | Imputed |
| rs78282637  | 10:18426763_C/A       | 0.181 | 0.630 | 0.983 | 0.863 | 1.121 | 0.799 | 0.993 | Imputed |
| rs75212981  | 10:18742976_T/C       | 0.040 | 0.538 | 0.968 | 0.750 | 1.248 | 0.800 | 0.977 | Imputed |
| rs17605291  | 10:18464959_A/G       | 0.045 | 0.312 | 0.968 | 0.752 | 1.245 | 0.800 | 0.899 | Imputed |
| rs12412532  | 10:18463335_T/C       | 0.107 | 1.000 | 1.021 | 0.867 | 1.202 | 0.800 | 0.976 | Imputed |
| rs60858250  | 10:18419390_G/A       | 0.182 | 0.594 | 0.983 | 0.863 | 1.121 | 0.801 | 0.990 | Imputed |
| rs11812341  | 10:18896923_T/C       | 0.182 | 0.663 | 0.982 | 0.856 | 1.128 | 0.801 | 0.893 | Imputed |
| rs11593617  | 10:18878180_C/T       | 0.180 | 0.827 | 0.982 | 0.856 | 1.128 | 0.801 | 0.901 | Imputed |
| rs55757115  | 10:18637162_T/C       | 0.005 | 1.000 | 1.120 | 0.464 | 2.703 | 0.802 | 0.623 | Imputed |
| rs4472829   | 10:18923072_C/A       | 0.013 | 1.000 | 0.936 | 0.556 | 1.574 | 0.802 | 0.692 | Imputed |
| rs16917367  | 10:18737815_T/A       | 0.041 | 0.541 | 0.968 | 0.751 | 1.248 | 0.803 | 0.976 | Imputed |
| rs74319868  | 10:18512653_A/G       | 0.025 | 0.737 | 1.043 | 0.751 | 1.447 | 0.804 | 0.934 | Imputed |
| rs76132658  | 10:18510103_C/T       | 0.009 | 0.256 | 0.933 | 0.542 | 1.609 | 0.804 | 0.955 | Imputed |
| rs10508563  | 10:18812591_C/A       | 0.173 | 0.439 | 0.983 | 0.860 | 1.124 | 0.804 | 0.990 | Imputed |
| rs75448534  | 10:18513106_G/A       | 0.025 | 0.737 | 1.042 | 0.751 | 1.446 | 0.804 | 0.932 | Imputed |
| rs1571787   | 10:18433986_G/A       | 0.295 | 0.032 | 0.986 | 0.883 | 1.101 | 0.804 | 0.965 | Imputed |
| rs12766105  | 10:18873225_C/G       | 0.180 | 0.785 | 0.983 | 0.856 | 1.128 | 0.805 | 0.904 | Imputed |
| rs34349692  | 10:18898729_G/GT      | 0.182 | 0.624 | 0.983 | 0.856 | 1.128 | 0.805 | 0.891 | Imputed |
| rs112097498 | 10:18651598_C/T       | 0.005 | 1.000 | 0.905 | 0.408 | 2.008 | 0.806 | 0.804 | Imputed |
| rs12778992  | 10:18900147_A/T       | 0.182 | 0.623 | 0.983 | 0.856 | 1.128 | 0.806 | 0.889 | Imputed |
| rs78053206  | 10:18849190_G/T       | 0.588 | 0.948 | 1.013 | 0.914 | 1.123 | 0.806 | 0.981 | Imputed |
| rs117758233 | 10:18738935_A/C       | 0.040 | 0.541 | 0.969 | 0.751 | 1.249 | 0.806 | 0.978 | Imputed |
| rs142872626 | 10:18678535_A/G       | 0.001 | 1.000 | 0.835 | 0.198 | 3.524 | 0.806 | 0.943 | Imputed |
| rs139762180 | 10:18531922_G/A       | 0.001 | 1.000 | 1.250 | 0.210 | 7.427 | 0.806 | 0.803 | Imputed |
| rs201987608 | 10:18849996_A/G       | 0.588 | 0.948 | 1.013 | 0.914 | 1.123 | 0.807 | 0.980 | Imputed |
| rs16917375  | 10:18739366_T/C       | 0.040 | 0.541 | 0.969 | 0.751 | 1.249 | 0.807 | 0.979 | Imputed |
| rs10764542  | 10:18791327_C/G       | 0.620 | 0.004 | 1.014 | 0.910 | 1.130 | 0.807 | 0.908 | Imputed |
| rs77827377  | 10:18633649_G/A       | 0.053 | 0.322 | 1.029 | 0.820 | 1.290 | 0.807 | 0.971 | Imputed |
| rs75117968  | 10:18740529_G/A       | 0.040 | 0.538 | 0.969 | 0.752 | 1.249 | 0.808 | 0.980 | Imputed |
| rs75746894  | 10:18740355_G/A       | 0.040 | 0.538 | 0.969 | 0.751 | 1.249 | 0.808 | 0.979 | Imputed |
| rs78571445  | 10:18740502_T/C       | 0.040 | 0.538 | 0.969 | 0.752 | 1.249 | 0.808 | 0.980 | Imputed |
| rs80014678  | 10:18404906_T/C       | 0.027 | 0.532 | 1.039 | 0.764 | 1.413 | 0.808 | 0.987 | Imputed |
| rs62634839  | 10:18857169_A/G       | 0.588 | 0.948 | 1.013 | 0.913 | 1.123 | 0.808 | 0.974 | Imputed |
| rs140960350 | 10:18843479_A/G       | 0.001 | 1.000 | 1.208 | 0.263 | 5.553 | 0.809 | 0.799 | Imputed |
| rs116176000 | 10:18857553_T/C       | 0.588 | 0.948 | 1.013 | 0.913 | 1.123 | 0.809 | 0.974 | Imputed |
| rs34566242  | 10:18812155_TA/T      | 0.173 | 0.439 | 0.984 | 0.860 | 1.125 | 0.809 | 0.990 | Imputed |
| rs1757235   | 10:18527039_C/A       | 0.482 | 0.000 | 1.013 | 0.912 | 1.126 | 0.809 | 0.880 | Imputed |
| rs12785031  | 10:18900169_T/C       | 0.182 | 0.623 | 0.983 | 0.856 | 1.129 | 0.809 | 0.889 | Imputed |
| rs17683046  | 10:18600922_A/G       | 0.031 | 0.072 | 0.958 | 0.674 | 1.361 | 0.809 | 0.635 | Imputed |
| rs191860474 | 10:18814078_G/C       | 0.010 | 1.000 | 0.938 | 0.560 | 1.573 | 0.809 | 0.955 | Imputed |
| rs187762046 | 10:18478179_T/C       | 0.001 | 1.000 | 0.810 | 0.146 | 4.484 | 0.810 | 0.664 | Imputed |
| rs113287031 | 10:18382680_T/A       | 0.005 | 1.000 | 1.103 | 0.498 | 2.439 | 0.810 | 0.851 | Imputed |
| 10:18555445 | 10:18555445_GT/G      | 0.086 | 0.224 | 1.025 | 0.835 | 1.259 | 0.810 | 0.769 | Imputed |
| rs59495303  | 10:18555445_GT/G      | 0.086 | 0.224 | 1.025 | 0.835 | 1.259 | 0.810 | 0.769 | Imputed |
| rs140175802 | 10:18582847_A/C       | 0.008 | 1.000 | 0.921 | 0.471 | 1.801 | 0.810 | 0.734 | Imputed |
| 10:18721764 | 10:18721764_A/C       | 0.033 | 0.747 | 1.042 | 0.747 | 1.453 | 0.811 | 0.688 | Imputed |
| 10:18721764 | 10:18721764_A/C       | 0.033 | 0.747 | 1.042 | 0.747 | 1.453 | 0.811 | 0.688 | Imputed |
| rs138130692 | 10:18721764_A/C       | 0.033 | 0.747 | 1.042 | 0.747 | 1.453 | 0.811 | 0.688 | Imputed |
| rs142882187 | 10:18721764_A/C       | 0.033 | 0.747 | 1.042 | 0.747 | 1.453 | 0.811 | 0.688 | Imputed |
| rs7075304   | 10:18860659_A/G       | 0.588 | 0.948 | 1.013 | 0.913 | 1.123 | 0.811 | 0.972 | Imputed |
| rs112395507 | 10:18580022_A/C       | 0.004 | 1.000 | 1.118 | 0.449 | 2.782 | 0.811 | 0.717 | Imputed |
| rs34606998  | 10:18430855_C/T       | 0.264 | 0.055 | 1.014 | 0.905 | 1.136 | 0.811 | 0.970 | Imputed |
| rs75580483  | 10:18736499_T/C       | 0.041 | 0.547 | 0.970 | 0.752 | 1.250 | 0.811 | 0.974 | Imputed |
| rs7068575   | 10:18860594_C/T       | 0.588 | 0.948 | 1.013 | 0.913 | 1.123 | 0.812 | 0.973 | Imputed |
| rs7919487   | 10:18868799_T/G       | 0.179 | 0.785 | 0.983 | 0.857 | 1.129 | 0.812 | 0.908 | Imputed |
| rs34523438  | 10:18805155_GA/G      | 0.173 | 0.578 | 0.984 | 0.861 | 1.125 | 0.813 | 0.994 | Imputed |
| rs112681817 | 10:18650209_C/T       | 0.005 | 1.000 | 0.908 | 0.410 | 2.011 | 0.813 | 0.806 | Imputed |
| rs10508562  | 10:18805506_G/A       | 0.172 | 0.578 | 0.984 | 0.861 | 1.125 | 0.813 | 0.999 | Imputed |
| rs113034425 | 10:18651275_C/T       | 0.005 | 1.000 | 0.908 | 0.409 | 2.016 | 0.813 | 0.808 | Imputed |
| rs12781038  | 10:18862431_G/A       | 0.588 | 0.948 | 1.013 | 0.913 | 1.123 | 0.813 | 0.973 | Imputed |
| rs112428623 | 10:18650201_G/A       | 0.005 | 1.000 | 0.909 | 0.410 | 2.011 | 0.813 | 0.806 | Imputed |
| rs62636217  | 10:18861275_A/C       | 0.588 | 0.948 | 1.013 | 0.913 | 1.123 | 0.813 | 0.973 | Imputed |
| rs4748489   | 10:18862970_T/C       | 0.588 | 0.922 | 1.013 | 0.913 | 1.123 | 0.813 | 0.973 | Imputed |
| rs139708810 | 10:18590558_A/G       | 0.069 | 0.034 | 0.976 | 0.796 | 1.196 | 0.813 | 0.930 | Imputed |
| rs6482529   | 10:18864223_A/G       | 0.588 | 0.922 | 1.013 | 0.913 | 1.123 | 0.814 | 0.972 | Imputed |
| rs10828766  | 10:18773750_A/G       | 0.508 | 0.613 | 1.012 | 0.914 | 1.121 | 0.814 | 0.956 | Imputed |
| rs12359508  | 10:18863690_G/C       | 0.588 | 0.922 | 1.012 | 0.913 | 1.123 | 0.814 | 0.973 | Imputed |
| rs10579235  | 10:18900652_GGTGTGT/G | 0.182 | 0.702 | 0.984 | 0.857 | 1.129 | 0.815 | 0.887 | Imputed |
| rs78351253  | 10:18361384_A/G       | 0.029 | 0.723 | 1.042 | 0.740 | 1.466 | 0.815 | 0.769 | Imputed |
| rs117431278 | 10:18566238_G/C       | 0.015 | 0.329 | 0.945 | 0.588 | 1.518 | 0.816 | 0.739 | Imputed |
| rs61844249  | 10:18559313_C/A       | 0.393 | 0.040 | 0.988 | 0.893 | 1.094 | 0.817 | 0.988 | Imputed |
| rs34195643  | 10:18720109_G/A       | 0.107 | 1.000 | 0.981 | 0.834 | 1.154 | 0.818 | 0.976 | Imputed |
| rs74117955  | 10:18632762_G/A       | 0.057 | 0.052 | 1.027 | 0.821 | 1.283 | 0.818 | 0.925 | Imputed |
| rs183899262 | 10:18778058_C/T       | 0.011 | 1.000 | 0.943 | 0.570 | 1.558 | 0.818 | 0.882 | Imputed |
| rs10764319  | 10:18428415_C/T       | 0.404 | 0.265 | 0.988 | 0.893 | 1.093 | 0.818 | 0.996 | Imputed |
| rs137931313 | 10:18923719_C/A       | 0.007 | 1.000 | 0.922 | 0.458 | 1.856 | 0.819 | 0.684 | Imputed |
| rs149674292 | 10:18400562_A/AG      | 0.029 | 0.534 | 1.036 | 0.762 | 1.410 | 0.820 | 0.938 | Imputed |
| rs60689569  | 10:18433292_C/A       | 0.182 | 0.749 | 0.985 | 0.864 | 1.123 | 0.820 | 0.991 | Imputed |
| rs6482384   | 10:18686267_G/T       | 0.282 | 0.007 | 1.013 | 0.908 | 1.129 | 0.820 | 0.996 | Imputed |
| rs7071827   | 10:18406813_C/T       | 0.027 | 0.534 | 1.036 | 0.762 | 1.409 | 0.820 | 0.988 | Imputed |
| rs2489197   | 10:18532478_C/G       | 0.252 | 0.000 | 1.014 | 0.897 | 1.147 | 0.820 | 0.871 | Imputed |
| rs11012932  | 10:18480227_A/G       | 0.164 | 0.566 | 0.984 | 0.856 | 1.131 | 0.821 | 0.948 | Imputed |
| rs4748438   | 10:18343319_G/A       | 0.488 | 0.174 | 0.989 | 0.895 | 1.092 | 0.821 | 0.989 | Imputed |
| rs145611198 | 10:18648363_G/A       | 0.005 | 1.000 | 0.912 | 0.409 | 2.031 | 0.821 | 0.811 | Imputed |
| rs117457698 | 10:18798992_T/C       | 0.008 | 0.188 | 1.071 | 0.590 | 1.944 | 0.821 | 0.867 | Imputed |

## SUPPLEMENTARY DATA

|             |                       |       |       |       |       |       |       |       |           |
|-------------|-----------------------|-------|-------|-------|-------|-------|-------|-------|-----------|
| rs7923480   | 10:18905665_T/C       | 0.182 | 0.623 | 0.984 | 0.857 | 1.130 | 0.822 | 0.883 | Imputed   |
| rs117750283 | 10:18567426_G/A       | 0.037 | 0.804 | 1.033 | 0.780 | 1.367 | 0.822 | 0.886 | Imputed   |
| rs77212700  | 10:18720097_C/T       | 0.072 | 1.000 | 0.977 | 0.799 | 1.195 | 0.823 | 0.928 | Imputed   |
| rs7081811   | 10:18813277_G/A       | 0.589 | 0.845 | 1.012 | 0.913 | 1.121 | 0.824 | 0.997 | Imputed   |
| rs3765181   | 10:18836931_G/A       | 0.052 | 0.049 | 0.973 | 0.762 | 1.241 | 0.824 | 0.847 | Imputed   |
| rs143972556 | 10:18692302_T/C       | 0.001 | 1.000 | 0.852 | 0.204 | 3.550 | 0.826 | 0.898 | Imputed   |
| rs184564053 | 10:18794946_C/T       | 0.010 | 1.000 | 0.944 | 0.563 | 1.581 | 0.826 | 0.948 | Imputed   |
| 10:18648326 | 10:18648326_G/GAGT    | 0.001 | 1.000 | 0.820 | 0.140 | 4.811 | 0.826 | 0.710 | Imputed   |
| rs7075151   | 10:18882040_G/A       | 0.583 | 0.974 | 1.012 | 0.912 | 1.122 | 0.826 | 0.966 | Imputed   |
| rs1750478   | 10:18603219_A/G       | 0.474 | 0.049 | 0.988 | 0.889 | 1.098 | 0.826 | 0.906 | Imputed   |
| rs188534599 | 10:18330559_T/C       | 0.011 | 0.013 | 0.938 | 0.531 | 1.657 | 0.826 | 0.642 | Imputed   |
| rs112192284 | 10:18651744_A/C       | 0.005 | 1.000 | 0.915 | 0.412 | 2.030 | 0.827 | 0.816 | Imputed   |
| rs12268188  | 10:18418796_T/C       | 0.005 | 1.000 | 0.911 | 0.393 | 2.108 | 0.827 | 0.676 | Imputed   |
| rs72784231  | 10:18573772_C/G       | 0.262 | 0.002 | 1.013 | 0.900 | 1.140 | 0.827 | 0.917 | Imputed   |
| rs113930288 | 10:18650263_TAAA/T    | 0.005 | 1.000 | 0.915 | 0.412 | 2.035 | 0.828 | 0.794 | Imputed   |
| rs10828835  | 10:18812436_A/G       | 0.589 | 0.845 | 1.011 | 0.913 | 1.120 | 0.828 | 0.997 | Imputed   |
| rs113862204 | 10:18685005_C/T       | 0.281 | 0.011 | 1.012 | 0.907 | 1.129 | 0.828 | 0.991 | Imputed   |
| rs11014049  | 10:18686452_G/A       | 0.281 | 0.010 | 1.012 | 0.908 | 1.128 | 0.831 | 0.999 | Genotyped |
| rs117222257 | 10:18361003_C/A       | 0.005 | 1.000 | 0.914 | 0.397 | 2.101 | 0.832 | 0.666 | Imputed   |
| rs118152228 | 10:18879828_C/A       | 0.187 | 0.873 | 0.985 | 0.860 | 1.129 | 0.832 | 0.899 | Imputed   |
| rs113040847 | 10:18654203_C/T       | 0.005 | 1.000 | 0.918 | 0.415 | 2.028 | 0.832 | 0.824 | Imputed   |
| 10:18926063 | 10:18926063_T/G       | 0.017 | 0.479 | 1.048 | 0.681 | 1.611 | 0.833 | 0.779 | Imputed   |
| rs4748497   | 10:18907034_T/C       | 0.183 | 0.623 | 0.985 | 0.858 | 1.132 | 0.833 | 0.879 | Imputed   |
| rs10828970  | 10:18883475_C/T       | 0.584 | 0.948 | 1.011 | 0.912 | 1.122 | 0.833 | 0.968 | Imputed   |
| rs17610035  | 10:18609784_T/C       | 0.022 | 0.092 | 1.042 | 0.714 | 1.520 | 0.833 | 0.804 | Imputed   |
| rs2489219   | 10:18552276_G/A       | 0.749 | 0.048 | 0.988 | 0.879 | 1.110 | 0.833 | 0.955 | Imputed   |
| rs7098721   | 10:18884437_C/T       | 0.584 | 0.948 | 1.011 | 0.912 | 1.122 | 0.833 | 0.969 | Imputed   |
| rs140720082 | 10:18912302_G/C       | 0.009 | 1.000 | 0.943 | 0.545 | 1.631 | 0.834 | 0.946 | Imputed   |
| rs11366888  | 10:18817633_AG/A      | 0.589 | 1.000 | 1.011 | 0.913 | 1.120 | 0.834 | 0.994 | Imputed   |
| rs16916837  | 10:18372940_C/T       | 0.007 | 1.000 | 1.084 | 0.509 | 2.310 | 0.834 | 0.606 | Imputed   |
| rs192688083 | 10:18551120_T/C       | 0.002 | 1.000 | 0.868 | 0.231 | 3.262 | 0.834 | 0.638 | Imputed   |
| rs34899824  | 10:18350800_C/CA      | 0.085 | 0.899 | 1.023 | 0.826 | 1.267 | 0.835 | 0.714 | Imputed   |
| rs143091833 | 10:18475497_T/C       | 0.002 | 1.000 | 0.887 | 0.287 | 2.746 | 0.835 | 0.961 | Imputed   |
| rs7921548   | 10:18649399_G/T       | 0.643 | 0.655 | 0.989 | 0.891 | 1.098 | 0.836 | 0.996 | Imputed   |
| rs11402800  | 10:18930604_G/GA      | 0.778 | 0.746 | 1.013 | 0.896 | 1.145 | 0.836 | 0.969 | Imputed   |
| rs75937466  | 10:18668956_G/C       | 0.016 | 1.000 | 1.050 | 0.659 | 1.674 | 0.836 | 0.703 | Imputed   |
| rs1277722   | 10:18554587_G/A       | 0.750 | 0.012 | 0.988 | 0.879 | 1.110 | 0.836 | 0.954 | Imputed   |
| rs34755622  | 10:18425706_T/TA      | 0.237 | 0.016 | 1.012 | 0.902 | 1.136 | 0.836 | 0.992 | Imputed   |
| rs7099975   | 10:18815426_G/T       | 0.588 | 0.974 | 1.011 | 0.913 | 1.120 | 0.836 | 0.996 | Imputed   |
| rs10764437  | 10:18648505_A/G       | 0.635 | 0.306 | 0.989 | 0.891 | 1.098 | 0.836 | 0.982 | Imputed   |
| rs1277751   | 10:18522261_C/T       | 0.805 | 0.043 | 0.987 | 0.870 | 1.119 | 0.836 | 0.974 | Imputed   |
| rs146042014 | 10:18629941_G/A       | 0.001 | 1.000 | 0.851 | 0.183 | 3.955 | 0.837 | 0.850 | Imputed   |
| rs5783583   | 10:18335324_C/CT      | 0.724 | 0.047 | 0.988 | 0.881 | 1.108 | 0.837 | 0.932 | Imputed   |
| 10:18458127 | 10:18458127_T/TA      | 0.155 | 0.081 | 1.015 | 0.884 | 1.164 | 0.838 | 0.975 | Imputed   |
| rs138697527 | 10:18458127_T/TA      | 0.155 | 0.081 | 1.015 | 0.884 | 1.164 | 0.838 | 0.975 | Imputed   |
| rs184285597 | 10:18884093_A/G       | 0.006 | 1.000 | 1.075 | 0.540 | 2.139 | 0.838 | 0.840 | Imputed   |
| rs10828327  | 10:18516070_G/C       | 0.025 | 0.675 | 0.964 | 0.677 | 1.372 | 0.838 | 0.837 | Imputed   |
| rs1331328   | 10:18532672_C/A       | 0.143 | 0.001 | 0.984 | 0.844 | 1.148 | 0.838 | 0.849 | Imputed   |
| rs76720202  | 10:18478943_C/G       | 0.013 | 1.000 | 0.953 | 0.597 | 1.520 | 0.838 | 0.897 | Imputed   |
| 10:18915700 | 10:18915700_T/TGGGGGA | 0.174 | 0.360 | 0.985 | 0.853 | 1.138 | 0.840 | 0.841 | Imputed   |
| rs11817171  | 10:18360057_G/C       | 0.007 | 1.000 | 1.079 | 0.517 | 2.252 | 0.840 | 0.634 | Imputed   |
| 10:18887604 | 10:18887604_A/G       | 0.006 | 1.000 | 1.074 | 0.539 | 2.138 | 0.840 | 0.840 | Imputed   |
| rs78163857  | 10:18479130_C/G       | 0.013 | 1.000 | 0.953 | 0.597 | 1.521 | 0.840 | 0.896 | Imputed   |
| rs10828786  | 10:18788390_A/T       | 0.258 | 0.000 | 0.987 | 0.866 | 1.124 | 0.840 | 0.772 | Imputed   |
| rs11814908  | 10:18516574_G/C       | 0.146 | 0.343 | 0.985 | 0.852 | 1.139 | 0.841 | 0.967 | Imputed   |
| rs2488149   | 10:18349786_G/T       | 0.627 | 0.000 | 1.011 | 0.906 | 1.130 | 0.841 | 0.854 | Imputed   |
| rs114371022 | 10:18791753_G/A       | 0.193 | 0.043 | 1.014 | 0.888 | 1.157 | 0.841 | 0.919 | Imputed   |
| rs7084044   | 10:18771570_G/T       | 0.155 | 0.078 | 0.985 | 0.852 | 1.139 | 0.841 | 0.898 | Imputed   |
| rs7090868   | 10:18360842_T/C       | 0.007 | 1.000 | 1.078 | 0.517 | 2.248 | 0.841 | 0.632 | Imputed   |
| rs7080181   | 10:18648606_A/G       | 0.638 | 0.259 | 0.989 | 0.891 | 1.098 | 0.842 | 0.981 | Imputed   |
| rs74807441  | 10:18752218_T/C       | 0.050 | 0.067 | 0.975 | 0.765 | 1.244 | 0.842 | 0.865 | Imputed   |
| 10:18590766 | 10:18590766_C/CG      | 0.069 | 0.034 | 0.979 | 0.799 | 1.201 | 0.842 | 0.933 | Imputed   |
| rs111289622 | 10:18667657_G/A       | 0.005 | 1.000 | 0.925 | 0.431 | 1.985 | 0.842 | 0.916 | Imputed   |
| rs10741019  | 10:18567397_G/A       | 0.727 | 0.011 | 1.012 | 0.901 | 1.136 | 0.843 | 0.938 | Imputed   |
| rs11012402  | 10:18344599_T/G       | 0.487 | 0.164 | 0.990 | 0.896 | 1.094 | 0.843 | 0.987 | Imputed   |
| rs59713597  | 10:18547395_G/A       | 0.186 | 0.000 | 0.986 | 0.859 | 1.133 | 0.843 | 0.847 | Imputed   |
| rs199538584 | 10:18362659_C/T       | 0.095 | 0.065 | 0.981 | 0.812 | 1.185 | 0.844 | 0.820 | Imputed   |
| rs145888848 | 10:18589472_G/T       | 0.002 | 1.000 | 1.135 | 0.322 | 3.997 | 0.844 | 0.879 | Imputed   |
| 10:18470997 | 10:18470997_T/G       | 0.010 | 1.000 | 1.056 | 0.611 | 1.825 | 0.844 | 0.793 | Imputed   |
| rs10828608  | 10:18666030_A/C       | 0.506 | 0.635 | 0.990 | 0.895 | 1.095 | 0.844 | 0.989 | Imputed   |
| rs113722239 | 10:18670409_G/GA      | 0.005 | 1.000 | 0.927 | 0.434 | 1.978 | 0.845 | 0.929 | Imputed   |
| rs7904365   | 10:18831304_A/T       | 0.785 | 0.743 | 1.012 | 0.896 | 1.144 | 0.845 | 0.997 | Imputed   |
| rs140058852 | 10:18798530_C/T       | 0.011 | 1.000 | 0.942 | 0.515 | 1.721 | 0.845 | 0.644 | Imputed   |
| rs10828859  | 10:18822342_C/A       | 0.580 | 0.603 | 1.010 | 0.912 | 1.118 | 0.847 | 0.990 | Imputed   |
| rs79994564  | 10:18511261_G/A       | 0.009 | 0.262 | 0.948 | 0.553 | 1.626 | 0.847 | 0.964 | Imputed   |
| rs187975725 | 10:18660182_C/T       | 0.008 | 0.137 | 0.935 | 0.469 | 1.862 | 0.847 | 0.655 | Imputed   |
| rs11014358  | 10:18754495_T/C       | 0.200 | 0.571 | 0.987 | 0.865 | 1.127 | 0.848 | 0.908 | Imputed   |
| 10:18389924 | 10:18389924_T/C       | 0.001 | 1.000 | 1.151 | 0.274 | 4.841 | 0.848 | 0.859 | Imputed   |
| rs17610275  | 10:18621630_T/G       | 0.032 | 0.032 | 1.033 | 0.741 | 1.441 | 0.848 | 0.696 | Imputed   |
| rs149319966 | 10:18882366_G/C       | 0.196 | 0.837 | 0.988 | 0.868 | 1.124 | 0.849 | 0.957 | Imputed   |
| rs10556493  | 10:18531757_CAA/C     | 0.796 | 0.000 | 0.988 | 0.868 | 1.123 | 0.849 | 0.895 | Imputed   |
| rs111427805 | 10:18715961_G/A       | 0.108 | 0.935 | 0.985 | 0.838 | 1.157 | 0.850 | 0.983 | Imputed   |
| rs78634075  | 10:18884992_T/C       | 0.198 | 1.000 | 0.988 | 0.868 | 1.124 | 0.850 | 0.958 | Imputed   |
| rs12220312  | 10:18512110_A/G       | 0.009 | 0.262 | 0.950 | 0.554 | 1.627 | 0.851 | 0.966 | Imputed   |
| rs4634984   | 10:18868840_A/T       | 0.589 | 1.000 | 1.010 | 0.911 | 1.120 | 0.851 | 0.973 | Imputed   |
| rs75133047  | 10:18688348_A/G       | 0.021 | 0.668 | 0.966 | 0.671 | 1.390 | 0.852 | 0.931 | Imputed   |
| rs72784229  | 10:18573654_A/G       | 0.261 | 0.007 | 1.011 | 0.899 | 1.138 | 0.853 | 0.917 | Imputed   |
| rs138591715 | 10:18584766_T/C       | 0.006 | 1.000 | 0.938 | 0.475 | 1.852 | 0.853 | 0.831 | Imputed   |
| rs11013938  | 10:18669271_G/C       | 0.176 | 0.743 | 1.013 | 0.885 | 1.158 | 0.853 | 0.956 | Imputed   |
| rs114092627 | 10:18400582_G/C       | 0.013 | 1.000 | 0.955 | 0.587 | 1.555 | 0.854 | 0.807 | Imputed   |
| 10:18923156 | 10:18923156_T/A       | 0.008 | 0.127 | 1.063 | 0.553 | 2.045 | 0.854 | 0.767 | Imputed   |
| rs16917330  | 10:18711046_C/G       | 0.106 | 1.000 | 0.985 | 0.837 | 1.159 | 0.854 | 0.984 | Imputed   |

## SUPPLEMENTARY DATA

|                        |                             |       |       |       |       |       |       |       |           |
|------------------------|-----------------------------|-------|-------|-------|-------|-------|-------|-------|-----------|
| rs57188373             | 10:18721379_CTGTG/C         | 0.763 | 0.178 | 0.989 | 0.876 | 1.116 | 0.854 | 0.940 | Imputed   |
| rs11593318             | 10:18479198_G/A             | 0.151 | 0.667 | 0.987 | 0.855 | 1.139 | 0.854 | 0.951 | Imputed   |
| rs10741120             | 10:18929992_A/G             | 0.783 | 0.653 | 1.012 | 0.894 | 1.145 | 0.855 | 0.969 | Imputed   |
| rs6482184              | 10:18403118_T/C             | 0.499 | 0.195 | 0.990 | 0.893 | 1.098 | 0.855 | 0.928 | Imputed   |
| rs11012759             | 10:18415244_G/C             | 0.273 | 0.474 | 1.011 | 0.903 | 1.131 | 0.855 | 0.986 | Imputed   |
| rs34912280             | 10:18513267_C/CAAA          | 0.682 | 0.031 | 0.990 | 0.889 | 1.102 | 0.856 | 0.976 | Imputed   |
| rs7071122              | 10:18535000_C/G             | 0.124 | 0.037 | 1.016 | 0.859 | 1.200 | 0.857 | 0.819 | Imputed   |
| rs7092437              | 10:18868564_T/C             | 0.589 | 1.000 | 1.010 | 0.910 | 1.119 | 0.857 | 0.976 | Imputed   |
| rs6482534              | 10:18868070_A/C             | 0.589 | 1.000 | 1.010 | 0.910 | 1.119 | 0.857 | 0.976 | Imputed   |
| rs16916944             | 10:18481044_C/T             | 0.150 | 0.667 | 0.987 | 0.854 | 1.140 | 0.857 | 0.947 | Imputed   |
| rs201654242            | 10:18636273_ATTTTTTTTTTTT/A | 0.957 | 0.779 | 1.027 | 0.766 | 1.378 | 0.858 | 0.715 | Imputed   |
| 10:18770112            | 10:18770112_A/T             | 0.022 | 0.162 | 1.034 | 0.715 | 1.497 | 0.858 | 0.866 | Imputed   |
| rs4484992              | 10:18870387_A/C             | 0.589 | 1.000 | 1.009 | 0.910 | 1.119 | 0.859 | 0.976 | Imputed   |
| rs10764296             | 10:18351509_G/A             | 0.555 | 0.037 | 0.991 | 0.894 | 1.098 | 0.859 | 0.940 | Imputed   |
| rs7100828              | 10:18375762_C/T             | 0.950 | 0.676 | 0.977 | 0.751 | 1.271 | 0.860 | 0.770 | Imputed   |
| 10:18856699            | 10:18856699_A/T             | 0.015 | 0.411 | 1.045 | 0.637 | 1.715 | 0.860 | 0.691 | Imputed   |
| rs12413079             | 10:18480425_G/A             | 0.150 | 0.667 | 0.987 | 0.855 | 1.140 | 0.861 | 0.950 | Imputed   |
| rs12414674             | 10:18480653_A/G             | 0.150 | 0.667 | 0.987 | 0.855 | 1.140 | 0.861 | 0.949 | Imputed   |
| rs7100880              | 10:18906507_A/G             | 0.408 | 0.871 | 1.010 | 0.907 | 1.123 | 0.861 | 0.925 | Imputed   |
| rs12249287             | 10:18507603_C/T             | 0.091 | 0.441 | 1.016 | 0.851 | 1.213 | 0.862 | 0.971 | Imputed   |
| rs10764584             | 10:18835325_T/C             | 0.763 | 0.484 | 1.011 | 0.898 | 1.137 | 0.862 | 0.998 | Imputed   |
| rs114936205            | 10:18507940_A/T             | 0.026 | 0.491 | 1.030 | 0.741 | 1.431 | 0.862 | 0.905 | Imputed   |
| rs4314963              | 10:18816633_C/T             | 0.173 | 0.657 | 0.988 | 0.864 | 1.130 | 0.862 | 0.986 | Imputed   |
| rs142218357            | 10:18439993_A/C             | 0.015 | 0.570 | 0.963 | 0.628 | 1.476 | 0.863 | 0.937 | Imputed   |
| 10:18856692            | 10:18856692_T/C             | 0.015 | 0.411 | 1.044 | 0.637 | 1.713 | 0.863 | 0.689 | Imputed   |
| rs66771230             | 10:18514507_CTCCT/C         | 0.741 | 0.080 | 0.990 | 0.883 | 1.110 | 0.864 | 0.968 | Imputed   |
| DUP_uwash_chr10_183785 |                             |       |       |       |       |       |       |       |           |
| 26_18407098            | 10:18378527_G/<CN2>         | 0.004 | 1.000 | 0.928 | 0.397 | 2.172 | 0.864 | 0.786 | Imputed   |
| rs16916941             | 10:18479219_T/C             | 0.005 | 1.000 | 0.930 | 0.404 | 2.140 | 0.864 | 0.650 | Imputed   |
| rs4747345              | 10:18712352_T/C             | 0.545 | 0.924 | 0.991 | 0.897 | 1.096 | 0.864 | 1.000 | Genotyped |
| rs1277733              | 10:18562538_C/T             | 0.775 | 0.074 | 1.011 | 0.894 | 1.142 | 0.865 | 0.945 | Imputed   |
| rs35061759             | 10:18873926_TA/T            | 0.775 | 0.435 | 1.011 | 0.894 | 1.142 | 0.865 | 0.957 | Imputed   |
| rs112257239            | 10:18877602_C/G             | 0.013 | 0.139 | 1.041 | 0.655 | 1.654 | 0.865 | 0.849 | Imputed   |
| rs78909139             | 10:18663728_C/G             | 0.005 | 1.000 | 0.936 | 0.434 | 2.018 | 0.865 | 0.872 | Imputed   |
| rs16916872             | 10:18411352_C/T             | 0.003 | 1.000 | 0.904 | 0.283 | 2.893 | 0.866 | 0.674 | Imputed   |
| 10:18494015            | 10:18494015_T/A             | 0.002 | 1.000 | 0.887 | 0.221 | 3.564 | 0.866 | 0.822 | Imputed   |
| rs55729747             | 10:18494015_T/A             | 0.002 | 1.000 | 0.887 | 0.221 | 3.564 | 0.866 | 0.822 | Imputed   |
| rs111542606            | 10:18670528_A/C             | 0.005 | 1.000 | 0.937 | 0.439 | 1.998 | 0.866 | 0.921 | Imputed   |
| rs182059360            | 10:18526469_C/G             | 0.022 | 0.222 | 1.031 | 0.724 | 1.466 | 0.866 | 0.905 | Imputed   |
| rs113059465            | 10:18669892_C/T             | 0.005 | 1.000 | 0.937 | 0.439 | 2.000 | 0.866 | 0.918 | Imputed   |
| rs1325990              | 10:18707352_A/G             | 0.545 | 0.679 | 0.991 | 0.897 | 1.096 | 0.867 | 0.988 | Imputed   |
| rs117724939            | 10:18731165_G/A             | 0.047 | 0.166 | 0.979 | 0.762 | 1.257 | 0.867 | 0.881 | Imputed   |
| rs7908550              | 10:18862211_A/T             | 0.784 | 0.781 | 1.011 | 0.893 | 1.144 | 0.867 | 0.965 | Imputed   |
| rs12783774             | 10:18706100_G/A             | 0.106 | 1.000 | 0.986 | 0.838 | 1.160 | 0.868 | 0.983 | Imputed   |
| rs78159967             | 10:18363631_G/A             | 0.021 | 0.640 | 1.033 | 0.705 | 1.514 | 0.868 | 0.811 | Imputed   |
| rs139201874            | 10:18363485_G/A             | 0.022 | 0.640 | 1.033 | 0.705 | 1.514 | 0.868 | 0.808 | Imputed   |
| rs140201325            | 10:18843974_A/T             | 0.010 | 1.000 | 1.045 | 0.622 | 1.754 | 0.868 | 0.982 | Imputed   |
| rs10828879             | 10:18835354_A/G             | 0.763 | 0.484 | 1.010 | 0.897 | 1.137 | 0.869 | 1.000 | Genotyped |
| rs34421026             | 10:18428170_CA/C            | 0.319 | 0.000 | 0.990 | 0.878 | 1.116 | 0.869 | 0.795 | Imputed   |
| rs117934381            | 10:18360505_C/A             | 0.022 | 0.640 | 1.033 | 0.705 | 1.512 | 0.869 | 0.804 | Imputed   |
| rs182777553            | 10:18706746_G/A             | 0.014 | 0.004 | 0.964 | 0.623 | 1.491 | 0.869 | 0.870 | Imputed   |
| 10:18844845            | 10:18844845_G/A             | 0.006 | 1.000 | 0.943 | 0.465 | 1.911 | 0.870 | 0.856 | Imputed   |
| rs34237250             | 10:18891714_G/A             | 0.179 | 0.912 | 0.989 | 0.860 | 1.136 | 0.871 | 0.893 | Imputed   |
| rs117978361            | 10:18362748_C/T             | 0.022 | 0.640 | 1.032 | 0.704 | 1.512 | 0.871 | 0.807 | Imputed   |
| rs12764398             | 10:18820626_C/T             | 0.173 | 0.657 | 0.989 | 0.865 | 1.130 | 0.872 | 0.991 | Imputed   |
| rs372714760            | 10:18674572_C/CA            | 0.484 | 0.704 | 1.008 | 0.911 | 1.117 | 0.872 | 0.972 | Imputed   |
| rs1892008              | 10:18528868_A/C             | 0.731 | 0.003 | 0.990 | 0.880 | 1.115 | 0.872 | 0.899 | Imputed   |
| rs12774593             | 10:18820815_G/A             | 0.173 | 0.618 | 0.989 | 0.865 | 1.130 | 0.872 | 0.991 | Imputed   |
| rs146118297            | 10:18496394_G/A             | 0.014 | 0.577 | 0.966 | 0.634 | 1.473 | 0.872 | 0.977 | Imputed   |
| rs7895775              | 10:18872858_C/T             | 0.588 | 0.922 | 1.008 | 0.910 | 1.118 | 0.873 | 0.975 | Imputed   |
| rs7909722              | 10:18579096_A/G             | 0.565 | 0.000 | 0.991 | 0.891 | 1.103 | 0.873 | 0.873 | Imputed   |
| rs6482545              | 10:18877511_A/G             | 0.589 | 1.000 | 1.008 | 0.910 | 1.118 | 0.873 | 0.980 | Imputed   |
| rs146025695            | 10:18753893_G/A             | 0.012 | 0.349 | 1.041 | 0.638 | 1.697 | 0.873 | 0.882 | Imputed   |
| rs112367021            | 10:18644668_C/CA            | 0.002 | 1.000 | 0.894 | 0.226 | 3.531 | 0.873 | 0.623 | Imputed   |
| rs117037682            | 10:18348397_C/A             | 0.001 | 1.000 | 0.866 | 0.149 | 5.045 | 0.873 | 0.716 | Imputed   |
| rs79093865             | 10:18792639_G/T             | 0.193 | 0.062 | 1.011 | 0.885 | 1.154 | 0.873 | 0.918 | Imputed   |
| rs79233510             | 10:18809748_G/T             | 0.169 | 0.334 | 0.989 | 0.864 | 1.132 | 0.873 | 0.978 | Imputed   |
| rs72786098             | 10:18729855_G/A             | 0.011 | 1.000 | 0.957 | 0.554 | 1.652 | 0.874 | 0.807 | Imputed   |
| rs11014508             | 10:18785568_G/C             | 0.184 | 0.024 | 1.011 | 0.882 | 1.159 | 0.874 | 0.878 | Imputed   |
| rs149205336            | 10:18716084_A/G             | 0.031 | 1.000 | 1.025 | 0.756 | 1.389 | 0.875 | 0.919 | Imputed   |
| rs141798101            | 10:18697943_C/T             | 0.013 | 0.465 | 1.037 | 0.660 | 1.630 | 0.875 | 0.936 | Imputed   |
| rs11013845             | 10:18651548_A/G             | 0.050 | 0.373 | 0.981 | 0.772 | 1.246 | 0.875 | 0.923 | Imputed   |
| rs17693687             | 10:18815719_T/G             | 0.194 | 0.919 | 0.990 | 0.871 | 1.125 | 0.876 | 0.988 | Imputed   |
| rs5783609              | 10:18819442_CA/C            | 0.389 | 0.006 | 0.991 | 0.890 | 1.104 | 0.876 | 0.916 | Imputed   |
| rs60661817             | 10:18475522_C/T             | 0.006 | 1.000 | 0.936 | 0.410 | 2.138 | 0.876 | 0.616 | Imputed   |
| rs11012760             | 10:18415289_C/G             | 0.260 | 0.284 | 1.009 | 0.900 | 1.132 | 0.876 | 0.983 | Imputed   |
| rs4475830              | 10:18886724_A/T             | 0.589 | 0.974 | 1.008 | 0.910 | 1.117 | 0.876 | 0.988 | Imputed   |
| rs4475829              | 10:18886556_A/G             | 0.589 | 1.000 | 1.008 | 0.910 | 1.117 | 0.876 | 0.988 | Imputed   |
| rs142365419            | 10:18788878_C/T             | 0.026 | 0.659 | 1.029 | 0.712 | 1.489 | 0.877 | 0.710 | Imputed   |
| rs56386348             | 10:18819822_C/T             | 0.171 | 0.657 | 0.989 | 0.864 | 1.133 | 0.878 | 0.977 | Imputed   |
| rs28970509             | 10:18849200_G/A             | 0.175 | 0.618 | 0.989 | 0.864 | 1.133 | 0.878 | 0.950 | Imputed   |
| rs12761409             | 10:18414778_C/T             | 0.275 | 0.427 | 1.009 | 0.902 | 1.128 | 0.878 | 0.992 | Imputed   |
| rs7908861              | 10:18709577_A/T             | 0.544 | 0.774 | 0.992 | 0.897 | 1.097 | 0.879 | 0.991 | Imputed   |
| rs61278674             | 10:18481737_A/G             | 0.112 | 0.019 | 0.987 | 0.836 | 1.166 | 0.879 | 0.890 | Imputed   |
| rs149271745            | 10:18619886_G/A             | 0.057 | 0.051 | 1.018 | 0.813 | 1.273 | 0.879 | 0.917 | Imputed   |
| rs7898536              | 10:18527870_T/C             | 0.468 | 0.003 | 0.992 | 0.899 | 1.096 | 0.880 | 0.984 | Imputed   |
| rs7912454              | 10:18584792_A/G             | 0.223 | 0.029 | 1.010 | 0.892 | 1.142 | 0.880 | 0.937 | Imputed   |
| rs12765690             | 10:18883367_T/G             | 0.178 | 0.782 | 0.989 | 0.861 | 1.137 | 0.880 | 0.898 | Imputed   |
| rs12779694             | 10:18883441_G/A             | 0.178 | 0.782 | 0.989 | 0.861 | 1.137 | 0.881 | 0.898 | Imputed   |
| rs7082041              | 10:18535064_T/C             | 0.498 | 0.000 | 1.008 | 0.909 | 1.117 | 0.881 | 0.900 | Imputed   |
| rs11593522             | 10:18705120_T/C             | 0.437 | 0.923 | 0.992 | 0.896 | 1.098 | 0.881 | 0.982 | Imputed   |
| rs114814656            | 10:18859742_C/T             | 0.781 | 0.782 | 1.009 | 0.893 | 1.141 | 0.881 | 0.975 | Imputed   |

## SUPPLEMENTARY DATA

|             |                             |       |       |       |       |       |       |       |           |
|-------------|-----------------------------|-------|-------|-------|-------|-------|-------|-------|-----------|
| rs138003649 | 10:18857777_A/ACATTC        | 0.780 | 0.746 | 1.009 | 0.893 | 1.141 | 0.881 | 0.974 | Imputed   |
| rs12765238  | 10:18887211_C/T             | 0.177 | 0.782 | 0.989 | 0.861 | 1.137 | 0.881 | 0.894 | Imputed   |
| rs7086757   | 10:18886761_C/G             | 0.177 | 0.782 | 0.989 | 0.861 | 1.137 | 0.882 | 0.894 | Imputed   |
| rs7904016   | 10:18880360_C/T             | 0.178 | 0.782 | 0.990 | 0.861 | 1.137 | 0.882 | 0.899 | Imputed   |
| rs2497811   | 10:18361536_A/G             | 0.690 | 0.505 | 1.008 | 0.905 | 1.123 | 0.883 | 0.983 | Imputed   |
| rs144359335 | 10:18849565_GGAATGGAATGGA/G | 0.175 | 0.618 | 0.990 | 0.864 | 1.134 | 0.883 | 0.950 | Imputed   |
| rs187806676 | 10:18598570_A/G             | 0.001 | 1.000 | 1.106 | 0.286 | 4.280 | 0.884 | 0.929 | Imputed   |
| rs115338787 | 10:18585647_G/T             | 0.007 | 1.000 | 0.950 | 0.481 | 1.876 | 0.884 | 0.786 | Imputed   |
| rs4256888   | 10:18472243_C/T             | 0.005 | 1.000 | 0.941 | 0.414 | 2.139 | 0.884 | 0.680 | Imputed   |
| rs73593761  | 10:18445315_A/G             | 0.005 | 1.000 | 0.939 | 0.404 | 2.185 | 0.884 | 0.745 | Imputed   |
| rs60917790  | 10:18831809_GTT/G           | 0.762 | 0.486 | 1.009 | 0.896 | 1.135 | 0.885 | 0.996 | Imputed   |
| rs111535062 | 10:18788298_A/G             | 0.067 | 0.319 | 1.016 | 0.820 | 1.258 | 0.885 | 0.879 | Imputed   |
| rs10828452  | 10:18592450_A/T             | 0.161 | 0.005 | 0.989 | 0.849 | 1.152 | 0.885 | 0.799 | Imputed   |
| 10:18396204 | 10:18396204_G/GTGT          | 0.003 | 1.000 | 0.927 | 0.333 | 2.581 | 0.885 | 0.910 | Imputed   |
| rs12772522  | 10:18875109_G/A             | 0.177 | 0.698 | 0.990 | 0.862 | 1.137 | 0.885 | 0.904 | Imputed   |
| rs16917298  | 10:18701320_G/A             | 0.106 | 1.000 | 0.988 | 0.840 | 1.162 | 0.885 | 0.986 | Imputed   |
| rs12770851  | 10:18873152_G/A             | 0.177 | 0.698 | 0.990 | 0.862 | 1.137 | 0.885 | 0.906 | Imputed   |
| rs111922999 | 10:18361989_G/A             | 0.022 | 0.640 | 1.028 | 0.702 | 1.506 | 0.885 | 0.805 | Imputed   |
| rs4748463   | 10:18712250_G/A             | 0.545 | 0.799 | 0.993 | 0.898 | 1.097 | 0.886 | 0.996 | Imputed   |
| rs2489196   | 10:18637655_C/T             | 0.405 | 0.023 | 1.008 | 0.907 | 1.120 | 0.886 | 0.928 | Imputed   |
| rs112972991 | 10:18444702_A/G             | 0.005 | 1.000 | 0.940 | 0.404 | 2.188 | 0.886 | 0.745 | Imputed   |
| rs144289489 | 10:18361759_T/A             | 0.022 | 0.640 | 1.028 | 0.702 | 1.506 | 0.887 | 0.805 | Imputed   |
| 10:18390668 | 10:18390668_T/C             | 0.005 | 0.043 | 1.064 | 0.451 | 2.509 | 0.887 | 0.669 | Imputed   |
| rs115161606 | 10:18848840_G/A             | 0.174 | 0.618 | 0.990 | 0.864 | 1.135 | 0.888 | 0.952 | Imputed   |
| rs7920075   | 10:18345137_C/T             | 0.573 | 0.674 | 0.993 | 0.896 | 1.100 | 0.888 | 0.968 | Imputed   |
| rs7098208   | 10:18553164_C/T             | 0.403 | 0.004 | 0.993 | 0.896 | 1.099 | 0.888 | 0.966 | Imputed   |
| 10:18397809 | 10:18397809_A/AAAAG         | 0.036 | 0.413 | 0.979 | 0.733 | 1.309 | 0.889 | 0.856 | Imputed   |
| rs111678114 | 10:18397809_A/AAAAG         | 0.036 | 0.413 | 0.979 | 0.733 | 1.309 | 0.889 | 0.856 | Imputed   |
| rs117205226 | 10:18883032_G/A             | 0.196 | 0.878 | 0.991 | 0.871 | 1.128 | 0.889 | 0.956 | Imputed   |
| rs77517356  | 10:18387108_T/C             | 0.004 | 1.000 | 0.934 | 0.356 | 2.446 | 0.889 | 0.676 | Imputed   |
| rs76998416  | 10:18725730_C/T             | 0.004 | 1.000 | 0.946 | 0.434 | 2.064 | 0.889 | 0.933 | Imputed   |
| rs74688143  | 10:18883877_G/C             | 0.197 | 0.959 | 0.991 | 0.871 | 1.127 | 0.889 | 0.957 | Imputed   |
| rs114162309 | 10:18883026_G/A             | 0.198 | 0.959 | 0.991 | 0.871 | 1.127 | 0.889 | 0.956 | Imputed   |
| 10:18850313 | 10:18850313_C/G             | 0.095 | 0.588 | 1.015 | 0.819 | 1.259 | 0.889 | 0.646 | Imputed   |
| rs7076562   | 10:18774722_G/C             | 0.499 | 0.058 | 1.007 | 0.908 | 1.117 | 0.890 | 0.927 | Imputed   |
| rs34740546  | 10:18693495_T/A             | 0.106 | 0.805 | 0.989 | 0.840 | 1.163 | 0.890 | 0.980 | Imputed   |
| rs10828327  | 10:18516070_G/A             | 0.009 | 0.256 | 0.963 | 0.564 | 1.644 | 0.890 | 0.967 | Imputed   |
| rs7075135   | 10:18884052_T/C             | 0.177 | 0.782 | 0.990 | 0.862 | 1.138 | 0.890 | 0.896 | Imputed   |
| rs1325995   | 10:18657181_G/C             | 0.478 | 0.486 | 0.993 | 0.897 | 1.099 | 0.891 | 0.982 | Imputed   |
| rs7905365   | 10:18876408_G/A             | 0.176 | 0.698 | 0.990 | 0.862 | 1.138 | 0.891 | 0.900 | Imputed   |
| rs7082391   | 10:18660471_T/G             | 0.505 | 0.636 | 0.993 | 0.898 | 1.099 | 0.892 | 0.986 | Imputed   |
| rs7897163   | 10:18414220_C/T             | 0.275 | 0.451 | 1.008 | 0.901 | 1.127 | 0.892 | 0.999 | Genotyped |
| rs117510236 | 10:18852685_A/G             | 0.175 | 0.618 | 0.991 | 0.864 | 1.136 | 0.892 | 0.939 | Imputed   |
| rs17621077  | 10:18819782_A/G             | 0.195 | 0.686 | 0.991 | 0.873 | 1.126 | 0.892 | 0.999 | Genotyped |
| rs114304084 | 10:18586884_G/A             | 0.007 | 1.000 | 0.954 | 0.484 | 1.882 | 0.892 | 0.788 | Imputed   |
| rs12247369  | 10:18434591_A/G             | 0.184 | 0.488 | 0.991 | 0.869 | 1.130 | 0.892 | 0.982 | Imputed   |
| rs113479298 | 10:18711996_G/A             | 0.031 | 1.000 | 1.021 | 0.754 | 1.383 | 0.893 | 0.921 | Imputed   |
| rs144407277 | 10:18855189_C/T             | 0.175 | 0.618 | 0.991 | 0.864 | 1.136 | 0.893 | 0.932 | Imputed   |
| rs115825263 | 10:18854167_C/G             | 0.175 | 0.618 | 0.991 | 0.864 | 1.136 | 0.893 | 0.934 | Imputed   |
| rs76013009  | 10:18442900_C/A             | 0.005 | 1.000 | 0.944 | 0.405 | 2.199 | 0.893 | 0.750 | Imputed   |
| rs12766314  | 10:18873290_C/A             | 0.176 | 0.698 | 0.991 | 0.862 | 1.138 | 0.894 | 0.904 | Imputed   |
| rs12254400  | 10:18555510_C/A             | 0.074 | 0.451 | 1.014 | 0.823 | 1.249 | 0.894 | 0.859 | Imputed   |
| rs1575835   | 10:18714742_A/T             | 0.546 | 0.774 | 0.993 | 0.898 | 1.098 | 0.894 | 0.992 | Imputed   |
| rs77017981  | 10:18751426_C/T             | 0.017 | 1.000 | 1.033 | 0.643 | 1.658 | 0.895 | 0.695 | Imputed   |
| rs116536733 | 10:18855442_T/C             | 0.176 | 0.658 | 0.991 | 0.864 | 1.136 | 0.895 | 0.930 | Imputed   |
| rs10828784  | 10:18788273_C/G             | 0.242 | 0.000 | 1.009 | 0.886 | 1.148 | 0.895 | 0.788 | Imputed   |
| rs58830289  | 10:18828670_T/C             | 0.177 | 0.112 | 1.009 | 0.880 | 1.157 | 0.895 | 0.934 | Imputed   |
| rs116177859 | 10:18414739_T/C             | 0.013 | 1.000 | 1.032 | 0.646 | 1.648 | 0.895 | 0.883 | Imputed   |
| rs1290126   | 10:18639462_C/T             | 0.354 | 0.139 | 1.007 | 0.905 | 1.121 | 0.895 | 0.950 | Imputed   |
| rs138877185 | 10:18858951_CATTCCATTCT/C   | 0.176 | 0.618 | 0.991 | 0.864 | 1.137 | 0.896 | 0.927 | Imputed   |
| rs112118763 | 10:18513238_T/C             | 0.004 | 1.000 | 0.944 | 0.396 | 2.249 | 0.896 | 0.846 | Imputed   |
| rs186771367 | 10:18500843_G/A             | 0.003 | 1.000 | 1.080 | 0.340 | 3.429 | 0.896 | 0.669 | Imputed   |
| rs11592084  | 10:18477286_G/A             | 0.156 | 0.371 | 0.991 | 0.861 | 1.141 | 0.896 | 0.962 | Imputed   |
| rs12772009  | 10:18896528_G/A             | 0.178 | 0.782 | 0.991 | 0.862 | 1.139 | 0.896 | 0.889 | Imputed   |
| rs10740989  | 10:18398125_C/A             | 0.781 | 0.031 | 0.992 | 0.872 | 1.127 | 0.897 | 0.885 | Imputed   |
| rs113159221 | 10:18644136_C/T             | 0.360 | 0.217 | 1.007 | 0.906 | 1.119 | 0.897 | 0.967 | Imputed   |
| rs11014442  | 10:18770059_C/T             | 0.027 | 0.683 | 1.024 | 0.717 | 1.463 | 0.897 | 0.739 | Imputed   |
| rs996861    | 10:18478008_C/A             | 0.156 | 0.371 | 0.991 | 0.860 | 1.141 | 0.897 | 0.960 | Imputed   |
| rs111330813 | 10:18763517_G/A             | 0.002 | 1.000 | 1.093 | 0.284 | 4.206 | 0.897 | 0.839 | Imputed   |
| rs34491805  | 10:18643863_T/TA            | 0.360 | 0.217 | 1.007 | 0.906 | 1.119 | 0.897 | 0.966 | Imputed   |
| rs7093907   | 10:18876154_C/G             | 0.782 | 1.000 | 1.008 | 0.892 | 1.139 | 0.897 | 0.982 | Imputed   |
| rs2488133   | 10:18332634_G/A             | 0.269 | 0.088 | 1.008 | 0.897 | 1.132 | 0.898 | 0.926 | Imputed   |
| rs116664590 | 10:18407951_T/A             | 0.003 | 1.000 | 0.939 | 0.360 | 2.452 | 0.898 | 0.825 | Imputed   |
| rs6415964   | 10:18381086_C/T             | 0.767 | 0.007 | 1.008 | 0.890 | 1.143 | 0.898 | 0.881 | Imputed   |
| rs199612214 | 10:18578216_TTTTGTTTTG/T    | 0.209 | 0.000 | 1.009 | 0.875 | 1.165 | 0.898 | 0.765 | Imputed   |
| rs76981819  | 10:18636321_A/G             | 0.029 | 0.770 | 0.980 | 0.720 | 1.334 | 0.898 | 0.936 | Imputed   |
| rs4576718   | 10:18423538_C/T             | 0.156 | 0.133 | 1.009 | 0.880 | 1.156 | 0.899 | 0.989 | Imputed   |
| 10:18661084 | 10:18661084_C/T             | 0.006 | 1.000 | 1.044 | 0.533 | 2.045 | 0.899 | 0.948 | Imputed   |
| rs12780808  | 10:18696386_A/T             | 0.106 | 1.000 | 0.990 | 0.842 | 1.164 | 0.900 | 0.987 | Imputed   |
| rs75553798  | 10:18394084_G/T             | 0.006 | 1.000 | 1.044 | 0.533 | 2.046 | 0.900 | 0.895 | Imputed   |
| rs7910756   | 10:18585920_C/T             | 0.079 | 0.518 | 0.987 | 0.801 | 1.216 | 0.901 | 0.799 | Imputed   |
| rs141979321 | 10:18775311_A/G             | 0.002 | 1.000 | 1.090 | 0.282 | 4.205 | 0.901 | 0.822 | Imputed   |
| rs76927382  | 10:18700316_A/G             | 0.035 | 0.628 | 0.982 | 0.732 | 1.316 | 0.901 | 0.863 | Imputed   |
| rs150725869 | 10:18433563_C/G             | 0.003 | 1.000 | 0.931 | 0.299 | 2.900 | 0.901 | 0.745 | Imputed   |
| rs1277723   | 10:18554623_G/A             | 0.748 | 0.032 | 0.993 | 0.883 | 1.115 | 0.902 | 0.958 | Imputed   |
| rs36095580  | 10:18695273_G/A             | 0.106 | 0.805 | 0.990 | 0.842 | 1.164 | 0.902 | 0.983 | Imputed   |
| rs147785662 | 10:18856823_C/T             | 0.175 | 0.618 | 0.991 | 0.864 | 1.138 | 0.902 | 0.927 | Imputed   |
| rs56276305  | 10:18450970_G/A             | 0.068 | 0.164 | 0.988 | 0.810 | 1.204 | 0.902 | 0.989 | Imputed   |
| rs17682059  | 10:18557547_T/A             | 0.165 | 0.013 | 0.991 | 0.859 | 1.144 | 0.902 | 0.874 | Imputed   |
| rs5783607   | 10:18803035_C/C/T           | 0.589 | 0.922 | 1.006 | 0.908 | 1.116 | 0.903 | 0.983 | Imputed   |
| rs4748487   | 10:18857862_G/A             | 0.175 | 0.618 | 0.991 | 0.864 | 1.138 | 0.903 | 0.925 | Imputed   |
| rs4747355   | 10:18857860_T/C             | 0.175 | 0.618 | 0.991 | 0.864 | 1.138 | 0.903 | 0.925 | Imputed   |

SUPPLEMENTARY DATA

|             |                         |       |       |       |       |       |       |       |         |
|-------------|-------------------------|-------|-------|-------|-------|-------|-------|-------|---------|
| rs7909814   | 10:18899231_C/T         | 0.178 | 0.699 | 0.991 | 0.862 | 1.140 | 0.903 | 0.887 | Imputed |
| rs186666343 | 10:18391002_A/G         | 0.006 | 1.000 | 1.043 | 0.532 | 2.045 | 0.903 | 0.898 | Imputed |
| rs7897452   | 10:18414466_C/T         | 0.262 | 0.218 | 1.007 | 0.899 | 1.129 | 0.903 | 0.899 | Imputed |
| rs141906765 | 10:18857816_C/A         | 0.175 | 0.618 | 0.992 | 0.864 | 1.138 | 0.904 | 0.926 | Imputed |
| rs111619892 | 10:18590452_A/G         | 0.075 | 0.517 | 0.987 | 0.802 | 1.216 | 0.904 | 0.836 | Imputed |
| rs4748479   | 10:18801237_A/T         | 0.793 | 0.290 | 1.008 | 0.887 | 1.145 | 0.905 | 0.932 | Imputed |
| rs182036187 | 10:18544682_A/T         | 0.006 | 1.000 | 1.040 | 0.543 | 1.993 | 0.905 | 0.891 | Imputed |
| rs4748483   | 10:18822667_G/C         | 0.451 | 0.407 | 0.994 | 0.897 | 1.101 | 0.905 | 0.980 | Imputed |
| rs76269973  | 10:18509652_G/A         | 0.067 | 0.243 | 1.013 | 0.824 | 1.244 | 0.905 | 0.934 | Imputed |
| rs74118099  | 10:18353038_C/G         | 0.012 | 1.000 | 1.034 | 0.595 | 1.797 | 0.906 | 0.663 | Imputed |
| rs7918142   | 10:18755840_T/G         | 0.449 | 0.292 | 0.994 | 0.897 | 1.101 | 0.906 | 0.956 | Imputed |
| rs78417590  | 10:18623643_A/G         | 0.022 | 0.255 | 1.022 | 0.713 | 1.465 | 0.907 | 0.856 | Imputed |
| rs2497796   | 10:18344751_C/G         | 0.641 | 0.050 | 1.006 | 0.905 | 1.118 | 0.907 | 0.955 | Imputed |
| rs184315156 | 10:18883481_G/A         | 0.011 | 1.000 | 0.965 | 0.534 | 1.746 | 0.907 | 0.672 | Imputed |
| rs181375953 | 10:18656488_C/G         | 0.011 | 0.249 | 1.034 | 0.588 | 1.820 | 0.908 | 0.720 | Imputed |
| rs77610370  | 10:18792637_G/A         | 0.185 | 0.151 | 1.008 | 0.881 | 1.153 | 0.908 | 0.924 | Imputed |
| rs147844424 | 10:18755517_G/A         | 0.002 | 1.000 | 1.083 | 0.280 | 4.182 | 0.908 | 0.841 | Imputed |
| rs4747353   | 10:18836957_C/T         | 0.761 | 0.460 | 1.007 | 0.895 | 1.133 | 0.908 | 0.997 | Imputed |
| rs16917387  | 10:18776891_A/T         | 0.069 | 0.589 | 0.988 | 0.801 | 1.218 | 0.909 | 0.892 | Imputed |
| rs45626038  | 10:18874728_C/CACAAG    | 0.782 | 1.000 | 1.007 | 0.891 | 1.138 | 0.909 | 0.981 | Imputed |
| rs10828765  | 10:18773002_C/T         | 0.516 | 0.527 | 1.006 | 0.908 | 1.114 | 0.909 | 0.956 | Imputed |
| rs12784081  | 10:18571608_C/A         | 0.053 | 0.001 | 0.986 | 0.766 | 1.268 | 0.910 | 0.742 | Imputed |
| rs78439599  | 10:18363029_G/T         | 0.022 | 0.640 | 1.022 | 0.698 | 1.497 | 0.910 | 0.796 | Imputed |
| rs7088214   | 10:18911846_C/A         | 0.587 | 0.870 | 1.006 | 0.907 | 1.115 | 0.910 | 0.978 | Imputed |
| rs1779214   | 10:18513677_T/C         | 0.793 | 0.081 | 0.993 | 0.879 | 1.122 | 0.910 | 0.990 | Imputed |
| rs148443007 | 10:18708453_A/G         | 0.001 | 1.000 | 0.922 | 0.224 | 3.795 | 0.911 | 0.870 | Imputed |
| rs11388658  | 10:18836729_G/GA        | 0.761 | 0.460 | 1.007 | 0.895 | 1.133 | 0.911 | 0.998 | Imputed |
| rs76096342  | 10:18603007_G/A         | 0.020 | 0.350 | 0.978 | 0.666 | 1.437 | 0.911 | 0.853 | Imputed |
| rs112252058 | 10:18529329_G/A         | 0.014 | 1.000 | 1.027 | 0.640 | 1.649 | 0.912 | 0.758 | Imputed |
| rs12416052  | 10:18789267_T/C         | 0.357 | 0.004 | 0.994 | 0.890 | 1.110 | 0.912 | 0.899 | Imputed |
| rs373210078 | 10:18735988_CA/C        | 0.051 | 0.019 | 0.986 | 0.772 | 1.260 | 0.912 | 0.834 | Imputed |
| rs6482516   | 10:18839350_A/G         | 0.761 | 0.460 | 1.007 | 0.894 | 1.133 | 0.912 | 0.994 | Imputed |
| rs113173677 | 10:18636891_T/C         | 0.029 | 0.770 | 0.983 | 0.722 | 1.337 | 0.912 | 0.936 | Imputed |
| rs4328135   | 10:18839748_A/G         | 0.761 | 0.460 | 1.007 | 0.894 | 1.133 | 0.912 | 0.994 | Imputed |
| rs61840846  | 10:18895322_T/C         | 0.783 | 1.000 | 1.007 | 0.892 | 1.137 | 0.912 | 0.995 | Imputed |
| rs145582784 | 10:18917801_G/A         | 0.041 | 0.594 | 0.984 | 0.740 | 1.310 | 0.913 | 0.775 | Imputed |
| rs10828901  | 10:18841090_T/A         | 0.761 | 0.460 | 1.007 | 0.894 | 1.133 | 0.914 | 0.992 | Imputed |
| rs16916847  | 10:18385257_A/G         | 0.003 | 1.000 | 0.948 | 0.361 | 2.486 | 0.914 | 0.776 | Imputed |
| rs45503605  | 10:18874723_A/G         | 0.192 | 0.919 | 0.993 | 0.873 | 1.129 | 0.914 | 0.980 | Imputed |
| rs16916873  | 10:18413618_T/C         | 0.013 | 1.000 | 1.026 | 0.643 | 1.638 | 0.914 | 0.873 | Imputed |
| rs4748480   | 10:18801647_A/G         | 0.589 | 1.000 | 1.006 | 0.907 | 1.115 | 0.914 | 0.979 | Imputed |
| rs188224263 | 10:18663360_A/T         | 0.006 | 1.000 | 0.965 | 0.502 | 1.854 | 0.914 | 0.987 | Imputed |
| 10:18620855 | 10:18620855_T/G         | 0.007 | 1.000 | 0.964 | 0.499 | 1.865 | 0.914 | 0.794 | Imputed |
| rs4145903   | 10:18718052_T/C         | 0.630 | 0.324 | 1.006 | 0.906 | 1.116 | 0.914 | 0.981 | Imputed |
| rs11014852  | 10:18842336_C/T         | 0.761 | 0.460 | 1.007 | 0.894 | 1.133 | 0.914 | 0.991 | Imputed |
| rs78011406  | 10:18477990_A/C         | 0.150 | 0.667 | 0.992 | 0.860 | 1.145 | 0.915 | 0.956 | Imputed |
| rs6482546   | 10:18877557_A/G         | 0.782 | 1.000 | 1.007 | 0.891 | 1.137 | 0.915 | 0.983 | Imputed |
| rs28437427  | 10:18759505_C/G         | 0.238 | 0.571 | 1.007 | 0.893 | 1.135 | 0.915 | 0.962 | Imputed |
| rs143525226 | 10:18403563_C/A         | 0.003 | 1.000 | 0.949 | 0.363 | 2.483 | 0.915 | 0.873 | Imputed |
| rs4316423   | 10:18917453_C/G         | 0.782 | 0.710 | 1.007 | 0.890 | 1.138 | 0.915 | 0.976 | Imputed |
| rs61842434  | 10:18426435_G/A         | 0.194 | 0.508 | 0.993 | 0.874 | 1.128 | 0.915 | 0.991 | Imputed |
| rs9731044   | 10:18894285_A/G         | 0.783 | 1.000 | 1.007 | 0.891 | 1.137 | 0.916 | 0.994 | Imputed |
| rs2497798   | 10:18349822_G/T         | 0.127 | 0.407 | 0.991 | 0.842 | 1.167 | 0.916 | 0.853 | Imputed |
| rs4748496   | 10:18906957_T/C         | 0.180 | 0.581 | 0.993 | 0.863 | 1.141 | 0.916 | 0.876 | Imputed |
| rs115104488 | 10:18387391_C/T         | 0.003 | 1.000 | 0.950 | 0.362 | 2.490 | 0.917 | 0.778 | Imputed |
| 10:18878832 | 10:18878832_T/C         | 0.006 | 1.000 | 1.035 | 0.540 | 1.983 | 0.917 | 0.938 | Imputed |
| 10:18530697 | 10:18530697_CT/C        | 0.011 | 1.000 | 0.972 | 0.571 | 1.654 | 0.917 | 0.777 | Imputed |
| rs4338439   | 10:18883149_C/A         | 0.782 | 1.000 | 1.006 | 0.891 | 1.137 | 0.917 | 0.987 | Imputed |
| rs181106329 | 10:18780986_C/G         | 0.007 | 1.000 | 0.963 | 0.470 | 1.973 | 0.917 | 0.717 | Imputed |
| rs12763280  | 10:18694911_C/T         | 0.106 | 0.869 | 0.991 | 0.843 | 1.166 | 0.917 | 0.983 | Imputed |
| rs139500147 | 10:18776545_T/C         | 0.068 | 0.416 | 0.989 | 0.802 | 1.220 | 0.918 | 0.897 | Imputed |
| 10:18709787 | 10:18709787_A/C         | 0.001 | 1.000 | 0.929 | 0.226 | 3.815 | 0.918 | 0.868 | Imputed |
| rs140872455 | 10:18380338_C/G         | 0.006 | 1.000 | 1.036 | 0.528 | 2.034 | 0.918 | 0.900 | Imputed |
| rs146293180 | 10:18385826_A/G         | 0.003 | 1.000 | 0.951 | 0.363 | 2.494 | 0.919 | 0.783 | Imputed |
| rs74967009  | 10:18523511_A/G         | 0.009 | 0.243 | 0.972 | 0.565 | 1.674 | 0.919 | 0.936 | Imputed |
| rs141941638 | 10:18387527_T/C         | 0.003 | 1.000 | 0.952 | 0.363 | 2.495 | 0.920 | 0.783 | Imputed |
| rs10764459  | 10:18680670_G/A         | 0.584 | 0.282 | 0.995 | 0.897 | 1.103 | 0.920 | 0.977 | Imputed |
| rs12767068  | 10:18847251_A/G         | 0.759 | 0.794 | 1.006 | 0.893 | 1.134 | 0.920 | 0.971 | Imputed |
| rs7897506   | 10:18765836_C/G         | 0.446 | 0.798 | 1.005 | 0.908 | 1.112 | 0.921 | 0.980 | Imputed |
| rs148585486 | 10:18709243_TACAC/T     | 0.108 | 0.871 | 0.992 | 0.844 | 1.166 | 0.921 | 0.979 | Imputed |
| rs59027704  | 10:18778134_C/T         | 0.149 | 0.243 | 0.993 | 0.856 | 1.151 | 0.922 | 0.897 | Imputed |
| rs79489737  | 10:18577360_T/C         | 0.018 | 1.000 | 1.022 | 0.659 | 1.586 | 0.922 | 0.733 | Imputed |
| rs142709239 | 10:18388422_G/A         | 0.003 | 1.000 | 0.953 | 0.364 | 2.498 | 0.922 | 0.784 | Imputed |
| rs79658539  | 10:18740426_C/T         | 0.019 | 0.357 | 1.020 | 0.685 | 1.518 | 0.922 | 0.840 | Imputed |
| rs4578284   | 10:18908643_G/T         | 0.587 | 0.870 | 1.005 | 0.907 | 1.114 | 0.922 | 0.985 | Imputed |
| rs76586515  | 10:18869336_G/T         | 0.190 | 0.959 | 0.994 | 0.873 | 1.131 | 0.923 | 0.980 | Imputed |
| rs1277742   | 10:18558836_G/A         | 0.749 | 0.129 | 0.994 | 0.885 | 1.117 | 0.923 | 0.960 | Imputed |
| rs150213722 | 10:18398141_C/G         | 0.003 | 1.000 | 0.954 | 0.364 | 2.497 | 0.923 | 0.794 | Imputed |
| rs114294015 | 10:18398900_G/A         | 0.003 | 1.000 | 0.954 | 0.364 | 2.497 | 0.923 | 0.795 | Imputed |
| rs35967003  | 10:18466394_CA/C        | 0.803 | 0.001 | 0.993 | 0.863 | 1.142 | 0.924 | 0.801 | Imputed |
| rs73601548  | 10:18549889_C/T         | 0.068 | 0.495 | 1.011 | 0.813 | 1.257 | 0.924 | 0.850 | Imputed |
| rs75185982  | 10:18818866_G/C         | 0.004 | 1.000 | 0.963 | 0.439 | 2.111 | 0.924 | 0.928 | Imputed |
| rs16916925  | 10:18468211_A/G         | 0.152 | 0.625 | 0.993 | 0.863 | 1.143 | 0.924 | 0.983 | Imputed |
| rs200450047 | 10:18909020_ATT/A       | 0.740 | 0.293 | 0.994 | 0.883 | 1.119 | 0.924 | 0.932 | Imputed |
| rs143112293 | 10:18750646_C/T         | 0.002 | 1.000 | 1.068 | 0.274 | 4.154 | 0.925 | 0.837 | Imputed |
| rs1277840   | 10:18641841_C/T         | 0.358 | 0.085 | 0.995 | 0.895 | 1.107 | 0.925 | 0.951 | Imputed |
| 10:18863514 | 10:18863514_TAGAG/CAGAG | 0.190 | 1.000 | 0.994 | 0.873 | 1.131 | 0.925 | 0.980 | Imputed |
| rs16916922  | 10:18467744_A/T         | 0.152 | 0.669 | 0.993 | 0.863 | 1.143 | 0.925 | 0.982 | Imputed |
| rs12262147  | 10:18416819_A/T         | 0.014 | 1.000 | 1.023 | 0.639 | 1.636 | 0.926 | 0.831 | Imputed |
| rs140411482 | 10:18870561_G/A         | 0.014 | 0.148 | 1.021 | 0.658 | 1.585 | 0.926 | 0.879 | Imputed |
| rs2489198   | 10:18636568_A/G         | 0.442 | 0.002 | 1.005 | 0.905 | 1.116 | 0.926 | 0.919 | Imputed |
| rs183494412 | 10:18855971_T/G         | 0.028 | 0.771 | 0.986 | 0.722 | 1.346 | 0.927 | 0.954 | Imputed |

**SUPPLEMENTARY DATA**

|             |                                  |       |       |       |       |       |       |       |           |
|-------------|----------------------------------|-------|-------|-------|-------|-------|-------|-------|-----------|
| rs112692462 | 10:18798349_A/G                  | 0.010 | 0.003 | 0.975 | 0.572 | 1.664 | 0.927 | 0.842 | Imputed   |
| rs7075678   | 10:18874103_C/T                  | 0.781 | 1.000 | 1.006 | 0.890 | 1.136 | 0.928 | 0.980 | Imputed   |
| rs4748499   | 10:18910370_A/G                  | 0.180 | 0.544 | 0.994 | 0.864 | 1.143 | 0.930 | 0.869 | Imputed   |
| rs67008723  | 10:18694461_T/A                  | 0.107 | 0.805 | 0.993 | 0.845 | 1.167 | 0.930 | 0.981 | Imputed   |
| 10:18846652 | 10:18846652_G/A                  | 0.004 | 1.000 | 0.966 | 0.440 | 2.119 | 0.931 | 0.923 | Imputed   |
| rs11013417  | 10:18587144_C/A                  | 0.009 | 1.000 | 0.971 | 0.500 | 1.885 | 0.931 | 0.641 | Imputed   |
| rs112475399 | 10:18581488_G/A                  | 0.217 | 0.004 | 0.995 | 0.878 | 1.127 | 0.931 | 0.925 | Imputed   |
| rs4748498   | 10:18907053_G/A                  | 0.179 | 0.619 | 0.994 | 0.864 | 1.143 | 0.932 | 0.874 | Imputed   |
| rs73593775  | 10:18468094_T/C                  | 0.005 | 1.000 | 0.965 | 0.428 | 2.175 | 0.932 | 0.682 | Imputed   |
| rs73593776  | 10:18468843_T/G                  | 0.005 | 1.000 | 0.965 | 0.429 | 2.175 | 0.932 | 0.689 | Imputed   |
| 10:18730203 | 10:18730203_G/A                  | 0.007 | 0.153 | 0.973 | 0.519 | 1.826 | 0.933 | 0.888 | Imputed   |
| rs59555859  | 10:18400105_A/C                  | 0.041 | 1.000 | 0.989 | 0.755 | 1.295 | 0.933 | 0.880 | Imputed   |
| rs17693549  | 10:18812549_T/C                  | 0.190 | 0.918 | 1.006 | 0.884 | 1.144 | 0.933 | 0.984 | Imputed   |
| rs10828625  | 10:18682539_C/A                  | 0.583 | 0.204 | 0.996 | 0.899 | 1.103 | 0.934 | 1.000 | Genotyped |
| rs116918852 | 10:18355360_A/G                  | 0.022 | 0.640 | 1.016 | 0.694 | 1.488 | 0.934 | 0.796 | Imputed   |
| rs17609633  | 10:18585358_T/C                  | 0.075 | 0.517 | 0.991 | 0.805 | 1.221 | 0.934 | 0.836 | Imputed   |
| rs7918933   | 10:18806363_C/T                  | 0.760 | 0.965 | 1.005 | 0.892 | 1.133 | 0.934 | 0.966 | Imputed   |
| rs12769425  | 10:18911114_A/C                  | 0.180 | 0.543 | 0.994 | 0.864 | 1.144 | 0.934 | 0.867 | Imputed   |
| 10:18389442 | 10:18389442_T/C                  | 0.003 | 1.000 | 0.960 | 0.366 | 2.517 | 0.934 | 0.890 | Imputed   |
| rs12767923  | 10:18907751_G/A                  | 0.179 | 0.543 | 0.994 | 0.864 | 1.144 | 0.935 | 0.873 | Imputed   |
| rs149092178 | 10:18856653_CCATTCCATTCTGCATTT/C | 0.173 | 0.697 | 0.994 | 0.866 | 1.142 | 0.935 | 0.921 | Imputed   |
| rs78477605  | 10:18514087_A/G                  | 0.009 | 0.249 | 0.978 | 0.568 | 1.684 | 0.936 | 0.973 | Imputed   |
| rs117445494 | 10:18853220_C/T                  | 0.004 | 1.000 | 0.968 | 0.445 | 2.110 | 0.936 | 0.918 | Imputed   |
| rs150797886 | 10:18395343_G/A                  | 0.003 | 1.000 | 0.961 | 0.367 | 2.517 | 0.936 | 0.784 | Imputed   |
| rs914363    | 10:18529560_T/C                  | 0.566 | 0.000 | 1.004 | 0.906 | 1.113 | 0.936 | 0.937 | Imputed   |
| rs145219574 | 10:18907541_G/A                  | 0.188 | 1.000 | 1.005 | 0.883 | 1.145 | 0.937 | 0.982 | Imputed   |
| rs78421838  | 10:18514353_G/T                  | 0.009 | 0.249 | 0.978 | 0.568 | 1.684 | 0.937 | 0.974 | Imputed   |
| 10:18508887 | 10:18508887_G/A                  | 0.004 | 1.000 | 0.965 | 0.400 | 2.329 | 0.937 | 0.920 | Imputed   |
| rs10764587  | 10:18837830_C/G                  | 0.765 | 0.758 | 1.005 | 0.892 | 1.132 | 0.937 | 0.990 | Imputed   |
| rs7079776   | 10:18830669_T/C                  | 0.765 | 0.378 | 0.995 | 0.884 | 1.121 | 0.938 | 0.997 | Imputed   |
| rs11014511  | 10:18787195_T/C                  | 0.113 | 0.035 | 1.007 | 0.854 | 1.187 | 0.938 | 0.900 | Imputed   |
| rs7083121   | 10:18713130_G/C                  | 0.109 | 0.936 | 0.994 | 0.846 | 1.167 | 0.939 | 0.980 | Imputed   |
| rs141376722 | 10:18395327_G/A                  | 0.006 | 1.000 | 1.027 | 0.521 | 2.022 | 0.939 | 0.914 | Imputed   |
| rs5783611   | 10:18829981_A/ATGTT              | 0.765 | 0.378 | 0.995 | 0.884 | 1.121 | 0.939 | 0.997 | Imputed   |
| rs114004025 | 10:18844045_A/G                  | 0.766 | 0.825 | 1.005 | 0.891 | 1.132 | 0.939 | 0.983 | Imputed   |
| rs17682889  | 10:18587820_A/G                  | 0.075 | 0.698 | 0.992 | 0.806 | 1.221 | 0.940 | 0.839 | Imputed   |
| rs6482471   | 10:18769793_T/G                  | 0.463 | 0.874 | 1.004 | 0.907 | 1.112 | 0.940 | 0.964 | Imputed   |
| rs1779209   | 10:18514561_T/C                  | 0.665 | 0.047 | 1.004 | 0.903 | 1.116 | 0.940 | 0.981 | Imputed   |
| rs188875625 | 10:18354045_C/G                  | 0.003 | 1.000 | 0.964 | 0.364 | 2.551 | 0.940 | 0.915 | Imputed   |
| rs11013126  | 10:18528245_C/T                  | 0.463 | 0.008 | 0.996 | 0.903 | 1.099 | 0.941 | 0.999 | Genotyped |
| rs7067797   | 10:18772225_C/T                  | 0.533 | 0.751 | 1.004 | 0.907 | 1.111 | 0.941 | 0.961 | Imputed   |
| rs4636555   | 10:18903605_A/C                  | 0.584 | 0.974 | 1.004 | 0.905 | 1.113 | 0.941 | 0.977 | Imputed   |
| rs111466525 | 10:18522675_G/A                  | 0.004 | 1.000 | 0.968 | 0.398 | 2.350 | 0.942 | 0.911 | Imputed   |
| rs4747352   | 10:18828663_G/T                  | 0.782 | 0.853 | 1.005 | 0.890 | 1.134 | 0.942 | 0.995 | Imputed   |
| rs2228645   | 10:18828371_C/T                  | 0.177 | 0.957 | 0.995 | 0.872 | 1.136 | 0.942 | 0.992 | Imputed   |
| rs12781208  | 10:18909660_A/G                  | 0.181 | 0.544 | 0.995 | 0.865 | 1.145 | 0.943 | 0.867 | Imputed   |
| rs56008103  | 10:18589796_A/G                  | 0.218 | 0.081 | 1.005 | 0.888 | 1.137 | 0.943 | 0.944 | Imputed   |
| rs188725465 | 10:18351128_T/G                  | 0.003 | 1.000 | 0.965 | 0.363 | 2.563 | 0.943 | 0.925 | Imputed   |
| rs12778035  | 10:18912766_G/C                  | 0.180 | 0.543 | 0.995 | 0.864 | 1.145 | 0.944 | 0.863 | Imputed   |
| rs57557931  | 10:18515980_G/A                  | 0.009 | 0.249 | 0.981 | 0.570 | 1.686 | 0.944 | 0.978 | Imputed   |
| rs79190343  | 10:18793069_G/C                  | 0.023 | 0.233 | 1.013 | 0.714 | 1.437 | 0.944 | 0.883 | Imputed   |
| rs7905432   | 10:18925952_C/T                  | 0.186 | 0.752 | 0.995 | 0.872 | 1.136 | 0.945 | 0.958 | Imputed   |
| rs7074324   | 10:18707143_A/T                  | 0.108 | 1.000 | 0.994 | 0.846 | 1.168 | 0.945 | 0.983 | Imputed   |
| rs74926423  | 10:18793021_C/G                  | 0.023 | 0.233 | 1.012 | 0.714 | 1.436 | 0.945 | 0.882 | Imputed   |
| rs7089083   | 10:18912402_C/T                  | 0.180 | 0.507 | 0.995 | 0.864 | 1.146 | 0.945 | 0.861 | Imputed   |
| rs116856086 | 10:18813741_C/T                  | 0.190 | 0.918 | 1.004 | 0.883 | 1.143 | 0.946 | 0.986 | Imputed   |
| rs7073651   | 10:18801761_A/G                  | 0.590 | 0.922 | 1.004 | 0.905 | 1.113 | 0.946 | 0.975 | Imputed   |
| rs79031586  | 10:18791789_T/C                  | 0.017 | 0.006 | 1.015 | 0.654 | 1.576 | 0.947 | 0.763 | Imputed   |
| rs10828906  | 10:18841795_C/T                  | 0.762 | 0.664 | 1.004 | 0.891 | 1.131 | 0.947 | 0.982 | Imputed   |
| rs6482567   | 10:18914789_A/G                  | 0.782 | 0.817 | 1.004 | 0.888 | 1.135 | 0.948 | 0.979 | Imputed   |
| rs200823833 | 10:18516876_AGT/A                | 0.009 | 0.249 | 0.982 | 0.571 | 1.688 | 0.948 | 0.978 | Imputed   |
| rs182026996 | 10:18589482_C/T                  | 0.006 | 1.000 | 1.022 | 0.539 | 1.938 | 0.948 | 0.935 | Imputed   |
| rs61084330  | 10:18422648_A/G                  | 0.350 | 0.445 | 0.996 | 0.896 | 1.108 | 0.948 | 0.981 | Imputed   |
| rs1917209   | 10:18832560_G/A                  | 0.762 | 0.794 | 0.996 | 0.885 | 1.121 | 0.948 | 0.989 | Imputed   |
| rs10508560  | 10:18561206_G/A                  | 0.021 | 0.551 | 1.014 | 0.667 | 1.541 | 0.949 | 0.724 | Imputed   |
| rs74454088  | 10:18812720_A/G                  | 0.190 | 0.918 | 1.004 | 0.883 | 1.143 | 0.949 | 0.985 | Imputed   |
| rs183082533 | 10:18717761_A/G                  | 0.002 | 1.000 | 0.955 | 0.230 | 3.960 | 0.950 | 0.798 | Imputed   |
| rs11013768  | 10:18639242_C/T                  | 0.145 | 0.096 | 0.995 | 0.862 | 1.150 | 0.951 | 0.994 | Genotyped |
| rs138369898 | 10:18694880_AAAAC/A              | 0.107 | 0.680 | 0.995 | 0.846 | 1.170 | 0.951 | 0.973 | Imputed   |
| rs78732963  | 10:18614844_T/C                  | 0.008 | 1.000 | 1.018 | 0.572 | 1.812 | 0.951 | 0.903 | Imputed   |
| 10:18739687 | 10:18739687_G/T                  | 0.006 | 1.000 | 1.021 | 0.522 | 1.999 | 0.952 | 0.934 | Imputed   |
| rs7911922   | 10:18831697_T/C                  | 0.765 | 0.725 | 1.004 | 0.891 | 1.131 | 0.952 | 0.991 | Imputed   |
| rs56077438  | 10:18343111_G/GA                 | 0.261 | 0.013 | 0.996 | 0.887 | 1.119 | 0.952 | 0.944 | Imputed   |
| rs2357787   | 10:18356104_T/C                  | 0.576 | 0.163 | 0.997 | 0.900 | 1.104 | 0.952 | 0.961 | Imputed   |
| rs145031767 | 10:18923503_A/G                  | 0.024 | 0.206 | 1.012 | 0.696 | 1.470 | 0.952 | 0.744 | Imputed   |
| 10:18354135 | 10:18354135_G/GT                 | 0.022 | 0.637 | 1.012 | 0.691 | 1.481 | 0.952 | 0.788 | Imputed   |
| rs145357614 | 10:18604053_G/A                  | 0.006 | 1.000 | 0.980 | 0.500 | 1.919 | 0.952 | 0.867 | Imputed   |
| rs117041572 | 10:18929332_T/C                  | 0.004 | 1.000 | 0.977 | 0.447 | 2.133 | 0.953 | 0.909 | Imputed   |
| rs12774519  | 10:18925493_C/G                  | 0.181 | 0.160 | 1.004 | 0.871 | 1.158 | 0.953 | 0.842 | Imputed   |
| rs147225258 | 10:18875549_G/A                  | 0.191 | 0.959 | 0.996 | 0.876 | 1.133 | 0.954 | 0.980 | Imputed   |
| rs2357786   | 10:18355749_T/C                  | 0.593 | 0.226 | 0.997 | 0.899 | 1.106 | 0.954 | 0.950 | Imputed   |
| rs199675886 | 10:18353918_ACTTTT/A             | 0.022 | 0.637 | 1.011 | 0.691 | 1.480 | 0.955 | 0.790 | Imputed   |
| 10:18484902 | 10:18484902_T/TTT                | 0.004 | 1.000 | 0.975 | 0.414 | 2.299 | 0.955 | 0.790 | Imputed   |
| 10:18645764 | 10:18645764_G/T                  | 0.001 | 1.000 | 0.958 | 0.216 | 4.250 | 0.955 | 0.786 | Imputed   |
| rs1757226   | 10:18517019_C/T                  | 0.644 | 0.138 | 1.003 | 0.904 | 1.113 | 0.956 | 0.993 | Imputed   |
| rs76306051  | 10:18525289_C/T                  | 0.009 | 0.230 | 0.985 | 0.571 | 1.698 | 0.956 | 0.952 | Imputed   |
| rs11013115  | 10:18524294_G/A                  | 0.009 | 0.243 | 0.985 | 0.571 | 1.697 | 0.956 | 0.957 | Imputed   |
| rs11013092  | 10:18518876_A/G                  | 0.009 | 0.249 | 0.985 | 0.573 | 1.692 | 0.957 | 0.980 | Imputed   |
| rs16917151  | 10:18582514_A/G                  | 0.221 | 0.001 | 0.997 | 0.880 | 1.129 | 0.957 | 0.919 | Imputed   |
| rs12269200  | 10:18536511_A/G                  | 0.081 | 0.639 | 0.995 | 0.818 | 1.210 | 0.957 | 0.871 | Imputed   |
| rs34359432  | 10:18924659_C/T                  | 0.180 | 0.160 | 1.004 | 0.871 | 1.157 | 0.957 | 0.843 | Imputed   |
| rs34407644  | 10:18834657_AT/A                 | 0.176 | 1.000 | 0.996 | 0.872 | 1.139 | 0.958 | 0.982 | Imputed   |

# SUPPLEMENTARY DATA

|             |                                  |       |       |       |       |       |       |       |           |
|-------------|----------------------------------|-------|-------|-------|-------|-------|-------|-------|-----------|
| rs76304369  | 10:18359213_C/T                  | 0.015 | 0.197 | 1.012 | 0.658 | 1.556 | 0.958 | 0.908 | Imputed   |
| rs150507568 | 10:18928577_A/AT                 | 0.187 | 0.674 | 1.004 | 0.880 | 1.145 | 0.958 | 0.956 | Imputed   |
| 10:18509152 | 10:18509152_A/G                  | 0.012 | 1.000 | 1.013 | 0.624 | 1.643 | 0.959 | 0.885 | Imputed   |
| rs1779208   | 10:18515041_C/T                  | 0.736 | 0.348 | 1.003 | 0.896 | 1.123 | 0.959 | 0.990 | Imputed   |
| rs7077786   | 10:18892382_C/T                  | 0.780 | 0.963 | 1.003 | 0.889 | 1.132 | 0.959 | 1.000 | Genotyped |
| rs7099423   | 10:18912702_A/G                  | 0.179 | 0.507 | 0.996 | 0.865 | 1.147 | 0.959 | 0.862 | Imputed   |
| rs1757223   | 10:18514999_G/A                  | 0.736 | 0.348 | 1.003 | 0.896 | 1.123 | 0.959 | 0.990 | Imputed   |
| rs7069531   | 10:18683267_A/G                  | 0.387 | 0.005 | 1.003 | 0.906 | 1.110 | 0.959 | 0.974 | Imputed   |
| rs56271643  | 10:18683073_ATTGGCCAGGCTGGTCTC/A | 0.387 | 0.005 | 1.003 | 0.906 | 1.110 | 0.959 | 0.974 | Imputed   |
| rs77490468  | 10:18868671_T/C                  | 0.191 | 0.959 | 0.997 | 0.876 | 1.134 | 0.960 | 0.980 | Imputed   |
| rs375585758 | 10:18353825_GTT/G                | 0.022 | 0.637 | 1.010 | 0.690 | 1.478 | 0.960 | 0.786 | Imputed   |
| rs189884806 | 10:18403612_T/C                  | 0.002 | 1.000 | 0.967 | 0.255 | 3.661 | 0.961 | 0.864 | Imputed   |
| rs7910506   | 10:18807057_G/A                  | 0.762 | 1.000 | 1.003 | 0.889 | 1.131 | 0.963 | 0.966 | Imputed   |
| rs79414487  | 10:18353054_A/G                  | 0.022 | 0.637 | 1.009 | 0.689 | 1.477 | 0.963 | 0.788 | Imputed   |
| rs140577373 | 10:18425532_G/A                  | 0.003 | 1.000 | 0.978 | 0.374 | 2.558 | 0.964 | 0.910 | Imputed   |
| rs1539681   | 10:18514383_T/C                  | 0.736 | 0.348 | 1.003 | 0.895 | 1.123 | 0.964 | 0.990 | Imputed   |
| rs4237349   | 10:18922831_A/G                  | 0.180 | 0.178 | 1.003 | 0.871 | 1.156 | 0.964 | 0.846 | Imputed   |
| rs138751487 | 10:18495214_C/A                  | 0.012 | 1.000 | 0.987 | 0.568 | 1.716 | 0.964 | 0.666 | Imputed   |
| rs12416030  | 10:18789075_T/C                  | 0.195 | 0.348 | 0.997 | 0.873 | 1.138 | 0.964 | 0.906 | Imputed   |
| rs12762481  | 10:18929180_A/G                  | 0.182 | 0.114 | 1.003 | 0.870 | 1.156 | 0.964 | 0.838 | Imputed   |
| rs7920645   | 10:18530839_G/A                  | 0.460 | 0.006 | 0.998 | 0.903 | 1.103 | 0.964 | 0.966 | Imputed   |
| rs80167292  | 10:18526707_C/A                  | 0.009 | 0.230 | 0.988 | 0.572 | 1.705 | 0.965 | 0.935 | Imputed   |
| rs145028225 | 10:18922206_G/C                  | 0.187 | 0.958 | 1.003 | 0.880 | 1.144 | 0.965 | 0.962 | Imputed   |
| rs1779211   | 10:18514120_G/A                  | 0.736 | 0.327 | 1.003 | 0.895 | 1.123 | 0.965 | 0.989 | Imputed   |
| rs45485300  | 10:18841108_GA/G                 | 0.764 | 0.759 | 1.003 | 0.890 | 1.129 | 0.965 | 0.986 | Imputed   |
| 10:18591890 | 10:18591890_G/A                  | 0.005 | 1.000 | 1.017 | 0.465 | 2.227 | 0.966 | 0.829 | Imputed   |
| rs79214873  | 10:18852539_T/A                  | 0.762 | 0.662 | 0.997 | 0.885 | 1.124 | 0.966 | 0.974 | Imputed   |
| rs187910919 | 10:18655564_G/A                  | 0.012 | 0.349 | 0.990 | 0.606 | 1.615 | 0.967 | 0.874 | Imputed   |
| rs1779207   | 10:18515966_C/T                  | 0.644 | 0.129 | 1.002 | 0.903 | 1.112 | 0.967 | 0.993 | Imputed   |
| rs56194607  | 10:18675514_T/C                  | 0.063 | 0.067 | 0.995 | 0.796 | 1.244 | 0.967 | 0.858 | Imputed   |
| rs77624100  | 10:18528982_T/A                  | 0.014 | 0.302 | 0.989 | 0.593 | 1.651 | 0.967 | 0.645 | Imputed   |
| rs75391234  | 10:18910643_A/C                  | 0.024 | 0.217 | 1.008 | 0.697 | 1.456 | 0.968 | 0.764 | Imputed   |
| rs58927504  | 10:18356645_TC/T                 | 0.579 | 0.163 | 1.002 | 0.904 | 1.110 | 0.968 | 0.955 | Imputed   |
| rs34566433  | 10:18739555_CT/C                 | 0.149 | 0.120 | 0.997 | 0.854 | 1.163 | 0.968 | 0.815 | Imputed   |
| rs7077567   | 10:18752524_G/T                  | 0.316 | 0.000 | 0.998 | 0.886 | 1.123 | 0.968 | 0.822 | Imputed   |
| rs7900001   | 10:18427848_T/C                  | 0.003 | 1.000 | 0.981 | 0.375 | 2.566 | 0.968 | 0.910 | Imputed   |
| rs6482565   | 10:18900593_C/G                  | 0.778 | 0.963 | 1.002 | 0.888 | 1.131 | 0.969 | 0.990 | Imputed   |
| rs11013321  | 10:18572142_C/G                  | 0.489 | 0.019 | 1.002 | 0.904 | 1.110 | 0.969 | 0.937 | Imputed   |
| rs7083373   | 10:18579862_C/G                  | 0.330 | 0.000 | 0.998 | 0.890 | 1.119 | 0.969 | 0.852 | Imputed   |
| rs117347740 | 10:18854589_C/T                  | 0.008 | 0.182 | 1.012 | 0.557 | 1.838 | 0.969 | 0.861 | Imputed   |
| rs117343746 | 10:18860759_C/A                  | 0.189 | 1.000 | 0.997 | 0.876 | 1.135 | 0.970 | 0.981 | Imputed   |
| rs142770096 | 10:18921777_T/G                  | 0.187 | 0.876 | 1.003 | 0.879 | 1.143 | 0.970 | 0.962 | Imputed   |
| rs147509760 | 10:18470491_TTTTAT               | 0.714 | 0.000 | 1.002 | 0.887 | 1.132 | 0.971 | 0.811 | Imputed   |
| rs190871029 | 10:18613506_G/A                  | 0.006 | 1.000 | 0.988 | 0.504 | 1.935 | 0.971 | 0.912 | Imputed   |
| rs116880337 | 10:18364782_C/A                  | 0.016 | 0.197 | 0.992 | 0.646 | 1.523 | 0.971 | 0.865 | Imputed   |
| 10:18508939 | 10:18508939_G/A                  | 0.071 | 0.459 | 1.004 | 0.822 | 1.226 | 0.971 | 0.946 | Imputed   |
| rs2182346   | 10:18705035_C/T                  | 0.108 | 0.936 | 1.003 | 0.854 | 1.178 | 0.971 | 0.980 | Imputed   |
| rs148854987 | 10:18352265_T/C                  | 0.022 | 0.637 | 1.007 | 0.688 | 1.473 | 0.972 | 0.787 | Imputed   |
| rs7082235   | 10:18825694_C/T                  | 0.763 | 0.861 | 1.002 | 0.890 | 1.129 | 0.972 | 0.986 | Imputed   |
| 10:18442492 | 10:18442492_C/CTTATTTAT          | 0.209 | 0.025 | 0.998 | 0.884 | 1.127 | 0.973 | 0.984 | Imputed   |
| 10:18442492 | 10:18442492_C/CTTATTTAT          | 0.209 | 0.025 | 0.998 | 0.884 | 1.127 | 0.973 | 0.984 | Imputed   |
| rs138892750 | 10:18442492_C/CTTATTTAT          | 0.209 | 0.025 | 0.998 | 0.884 | 1.127 | 0.973 | 0.984 | Imputed   |
| rs151317298 | 10:18855216_C/T                  | 0.758 | 0.546 | 0.998 | 0.886 | 1.124 | 0.973 | 0.974 | Imputed   |
| rs78423559  | 10:18352080_C/T                  | 0.022 | 0.637 | 1.006 | 0.688 | 1.473 | 0.974 | 0.786 | Imputed   |
| rs140106802 | 10:18916922_C/G                  | 0.187 | 0.917 | 1.002 | 0.879 | 1.142 | 0.974 | 0.968 | Imputed   |
| rs188174729 | 10:18851696_G/A                  | 0.014 | 0.114 | 1.008 | 0.633 | 1.604 | 0.974 | 0.837 | Imputed   |
| rs117955456 | 10:18452119_C/G                  | 0.002 | 1.000 | 1.022 | 0.271 | 3.852 | 0.974 | 0.911 | Imputed   |
| rs7916200   | 10:18414258_G/C                  | 0.015 | 1.000 | 1.007 | 0.646 | 1.570 | 0.974 | 0.838 | Imputed   |
| 10:18917595 | 10:18917595_T/G                  | 0.002 | 1.000 | 1.018 | 0.340 | 3.053 | 0.974 | 0.938 | Imputed   |
| rs12764334  | 10:18833841_C/A                  | 0.177 | 1.000 | 0.998 | 0.874 | 1.139 | 0.975 | 0.991 | Imputed   |
| rs183387380 | 10:18785851_T/C                  | 0.003 | 1.000 | 1.017 | 0.354 | 2.922 | 0.975 | 0.776 | Imputed   |
| rs145552138 | 10:18351807_G/C                  | 0.022 | 0.637 | 1.006 | 0.688 | 1.472 | 0.975 | 0.786 | Imputed   |
| rs1277752   | 10:18522475_G/A                  | 0.791 | 0.052 | 0.998 | 0.882 | 1.130 | 0.975 | 0.957 | Imputed   |
| rs112745815 | 10:18477743_C/T                  | 0.010 | 1.000 | 1.008 | 0.591 | 1.721 | 0.975 | 0.923 | Imputed   |
| rs11013093  | 10:18518934_C/T                  | 0.191 | 0.838 | 0.998 | 0.879 | 1.133 | 0.976 | 1.000 | Genotyped |
| rs11013094  | 10:18519046_A/G                  | 0.191 | 0.838 | 0.998 | 0.879 | 1.133 | 0.976 | 0.999 | Imputed   |
| rs79360953  | 10:18771223_A/T                  | 0.009 | 0.218 | 0.992 | 0.560 | 1.755 | 0.977 | 0.860 | Imputed   |
| rs12775419  | 10:18870482_G/A                  | 0.174 | 0.615 | 0.998 | 0.868 | 1.148 | 0.977 | 0.904 | Imputed   |
| rs112368338 | 10:18454656_A/G                  | 0.003 | 1.000 | 0.986 | 0.377 | 2.579 | 0.977 | 0.870 | Imputed   |
| rs115609269 | 10:18468887_G/A                  | 0.003 | 1.000 | 1.013 | 0.387 | 2.651 | 0.979 | 0.818 | Imputed   |
| rs118112339 | 10:18351568_T/A                  | 0.022 | 0.637 | 1.005 | 0.687 | 1.471 | 0.979 | 0.785 | Imputed   |
| rs117392961 | 10:18826435_G/A                  | 0.021 | 0.141 | 1.005 | 0.693 | 1.458 | 0.979 | 0.842 | Imputed   |
| rs4485000   | 10:18789724_T/G                  | 0.360 | 0.002 | 0.999 | 0.892 | 1.118 | 0.980 | 0.864 | Imputed   |
| rs140429278 | 10:18461271_C/T                  | 0.003 | 1.000 | 0.988 | 0.377 | 2.585 | 0.980 | 0.860 | Imputed   |
| rs112443278 | 10:18552136_C/T                  | 0.004 | 1.000 | 1.012 | 0.409 | 2.505 | 0.980 | 0.867 | Imputed   |
| rs118051782 | 10:18407266_T/C                  | 0.013 | 1.000 | 1.006 | 0.628 | 1.612 | 0.980 | 0.861 | Imputed   |
| rs76594886  | 10:18351520_C/G                  | 0.022 | 0.637 | 1.005 | 0.687 | 1.470 | 0.980 | 0.785 | Imputed   |
| rs10674766  | 10:18820777_G/GTTTC              | 0.785 | 0.708 | 0.998 | 0.883 | 1.129 | 0.980 | 0.985 | Imputed   |
| rs1547168   | 10:18600263_A/G                  | 0.368 | 0.029 | 0.999 | 0.897 | 1.112 | 0.981 | 0.922 | Imputed   |
| rs116921807 | 10:18351040_C/T                  | 0.022 | 0.637 | 1.005 | 0.686 | 1.471 | 0.981 | 0.787 | Imputed   |
| rs12355091  | 10:18693013_A/G                  | 0.211 | 0.181 | 0.998 | 0.881 | 1.132 | 0.981 | 0.941 | Imputed   |
| rs111786492 | 10:18599679_T/A                  | 0.016 | 1.000 | 0.995 | 0.632 | 1.567 | 0.983 | 0.770 | Imputed   |
| rs112091987 | 10:18465670_C/T                  | 0.003 | 1.000 | 1.011 | 0.386 | 2.644 | 0.983 | 0.809 | Imputed   |
| rs117342204 | 10:18412142_T/C                  | 0.002 | 1.000 | 0.986 | 0.261 | 3.727 | 0.983 | 0.881 | Imputed   |
| rs77236703  | 10:18402638_C/T                  | 0.013 | 1.000 | 1.005 | 0.623 | 1.621 | 0.983 | 0.834 | Imputed   |
| rs16916868  | 10:18402919_T/C                  | 0.013 | 1.000 | 1.005 | 0.624 | 1.620 | 0.983 | 0.836 | Imputed   |
| rs116555594 | 10:18846876_G/T                  | 0.758 | 0.491 | 0.999 | 0.887 | 1.124 | 0.983 | 0.983 | Imputed   |
| rs4468242   | 10:18922659_C/A                  | 0.181 | 0.219 | 1.002 | 0.869 | 1.154 | 0.983 | 0.847 | Imputed   |
| rs191446164 | 10:18461004_A/G                  | 0.002 | 1.000 | 1.014 | 0.266 | 3.866 | 0.984 | 0.910 | Imputed   |
| rs77689599  | 10:18351390_A/T                  | 0.022 | 0.637 | 1.004 | 0.686 | 1.469 | 0.984 | 0.785 | Imputed   |
| rs137859149 | 10:18657757_C/G                  | 0.028 | 0.770 | 0.997 | 0.732 | 1.358 | 0.984 | 0.960 | Imputed   |
| rs114308674 | 10:18434906_C/T                  | 0.003 | 1.000 | 0.990 | 0.379 | 2.589 | 0.984 | 0.859 | Imputed   |

## SUPPLEMENTARY DATA

|             |                              |       |       |       |       |       |       |       |           |
|-------------|------------------------------|-------|-------|-------|-------|-------|-------|-------|-----------|
| rs117233423 | 10:18351363_C/G              | 0.022 | 0.637 | 1.004 | 0.686 | 1.469 | 0.984 | 0.785 | Imputed   |
| 10:18782917 | 10:18782917_G/T              | 0.004 | 1.000 | 0.992 | 0.423 | 2.323 | 0.984 | 0.806 | Imputed   |
| rs11014830  | 10:18840433_G/A              | 0.757 | 0.491 | 0.999 | 0.888 | 1.124 | 0.985 | 0.993 | Imputed   |
| rs201134023 | 10:18922337_T/TACA           | 0.181 | 0.240 | 1.001 | 0.869 | 1.154 | 0.985 | 0.847 | Imputed   |
| rs113551694 | 10:18596252_G/A              | 0.106 | 0.061 | 1.002 | 0.844 | 1.189 | 0.985 | 0.869 | Imputed   |
| rs11815232  | 10:18403294_C/T              | 0.013 | 1.000 | 1.005 | 0.624 | 1.619 | 0.985 | 0.838 | Imputed   |
| rs17682871  | 10:18587324_A/G              | 0.193 | 0.040 | 0.999 | 0.878 | 1.136 | 0.985 | 0.958 | Imputed   |
| 10:18363333 | 10:18363333_A/C              | 0.001 | 1.000 | 0.986 | 0.238 | 4.089 | 0.985 | 0.833 | Imputed   |
| rs61663155  | 10:18916398_C/T              | 0.179 | 0.437 | 0.999 | 0.867 | 1.151 | 0.986 | 0.853 | Imputed   |
| rs12257809  | 10:18356646_C/T              | 0.215 | 0.000 | 0.999 | 0.870 | 1.147 | 0.986 | 0.757 | Imputed   |
| rs7904949   | 10:18913462_G/A              | 0.181 | 0.440 | 0.999 | 0.868 | 1.149 | 0.986 | 0.862 | Imputed   |
| rs116856228 | 10:18351269_T/G              | 0.022 | 0.637 | 1.003 | 0.686 | 1.468 | 0.987 | 0.784 | Imputed   |
| rs78227925  | 10:18527276_G/A              | 0.072 | 0.618 | 1.002 | 0.819 | 1.225 | 0.987 | 0.925 | Imputed   |
| rs147646387 | 10:18435553_T/A              | 0.003 | 1.000 | 0.992 | 0.379 | 2.594 | 0.987 | 0.855 | Imputed   |
| 10:18891544 | 10:18891544_C/G              | 0.026 | 0.519 | 0.997 | 0.719 | 1.384 | 0.987 | 0.938 | Imputed   |
| rs117837566 | 10:18860951_T/G              | 0.023 | 0.233 | 0.997 | 0.695 | 1.431 | 0.987 | 0.817 | Imputed   |
| 10:18611805 | 10:18611805_A/ATT            | 0.036 | 0.141 | 0.998 | 0.744 | 1.339 | 0.988 | 0.829 | Imputed   |
| rs6482265   | 10:18584970_G/A              | 0.311 | 0.013 | 1.001 | 0.892 | 1.123 | 0.988 | 0.875 | Imputed   |
| rs374793418 | 10:18917243_G/A              | 0.188 | 1.000 | 0.999 | 0.877 | 1.139 | 0.988 | 0.967 | Imputed   |
| 10:18458127 | 10:18458127_T/A              | 0.006 | 1.000 | 0.995 | 0.501 | 1.976 | 0.988 | 0.867 | Imputed   |
| rs138697527 | 10:18458127_T/A              | 0.006 | 1.000 | 0.995 | 0.501 | 1.976 | 0.988 | 0.867 | Imputed   |
| rs10732437  | 10:18915902_C/T              | 0.780 | 0.747 | 1.001 | 0.886 | 1.131 | 0.988 | 0.976 | Imputed   |
| rs115786946 | 10:18440240_C/T              | 0.003 | 1.000 | 1.007 | 0.385 | 2.634 | 0.989 | 0.852 | Imputed   |
| rs146546379 | 10:18508937_C/CT             | 0.073 | 0.402 | 0.999 | 0.820 | 1.217 | 0.989 | 0.940 | Imputed   |
| rs78454855  | 10:18918482_G/A              | 0.181 | 0.317 | 0.999 | 0.867 | 1.151 | 0.989 | 0.850 | Imputed   |
| rs199858776 | 10:18468188_TAGC/T           | 0.003 | 1.000 | 0.994 | 0.379 | 2.603 | 0.990 | 0.869 | Imputed   |
| rs139033083 | 10:18527947_T/C              | 0.008 | 0.170 | 0.996 | 0.542 | 1.831 | 0.990 | 0.849 | Imputed   |
| rs139538722 | 10:18374301_C/T              | 0.084 | 0.815 | 0.999 | 0.820 | 1.217 | 0.991 | 0.827 | Imputed   |
| rs12247217  | 10:18700276_A/G              | 0.107 | 0.935 | 0.999 | 0.851 | 1.174 | 0.992 | 0.985 | Imputed   |
| rs148751687 | 10:18919046_G/A              | 0.774 | 0.927 | 1.001 | 0.885 | 1.131 | 0.992 | 0.956 | Imputed   |
| rs34856620  | 10:18354213_G/GT             | 0.560 | 0.095 | 0.999 | 0.902 | 1.107 | 0.992 | 0.942 | Imputed   |
| rs12267833  | 10:18700219_G/A              | 0.107 | 0.935 | 0.999 | 0.851 | 1.174 | 0.993 | 0.985 | Imputed   |
| rs141456462 | 10:18925361_G/A              | 0.188 | 0.917 | 0.999 | 0.876 | 1.140 | 0.993 | 0.959 | Imputed   |
| rs4456162   | 10:18905695_G/A              | 0.590 | 0.845 | 1.000 | 0.903 | 1.108 | 0.993 | 0.999 | Imputed   |
| rs149942482 | 10:18918010_G/A              | 0.181 | 0.267 | 1.001 | 0.869 | 1.152 | 0.994 | 0.851 | Imputed   |
| rs144279800 | 10:18918011_A/G              | 0.181 | 0.267 | 1.001 | 0.869 | 1.152 | 0.994 | 0.851 | Imputed   |
| rs12784986  | 10:18915139_A/C              | 0.180 | 0.347 | 1.001 | 0.869 | 1.152 | 0.994 | 0.858 | Imputed   |
| rs1757225   | 10:18516925_A/G              | 0.648 | 0.097 | 1.000 | 0.900 | 1.110 | 0.995 | 0.985 | Imputed   |
| rs2250996   | 10:18517047_A/G              | 0.648 | 0.097 | 1.000 | 0.900 | 1.110 | 0.995 | 0.984 | Imputed   |
| rs7909552   | 10:18909336_T/A              | 0.777 | 0.927 | 1.000 | 0.886 | 1.128 | 0.995 | 0.986 | Imputed   |
| rs145812820 | 10:18578390_A/AT             | 0.219 | 0.000 | 1.000 | 0.882 | 1.133 | 0.995 | 0.920 | Imputed   |
| rs7895709   | 10:18905935_T/C              | 0.590 | 0.845 | 1.000 | 0.903 | 1.108 | 0.996 | 1.000 | Genotyped |
| rs4575162   | 10:18917617_G/A              | 0.181 | 0.291 | 1.000 | 0.869 | 1.152 | 0.996 | 0.852 | Imputed   |
| rs11013133  | 10:18530538_C/G              | 0.065 | 0.051 | 1.000 | 0.810 | 1.234 | 0.996 | 0.902 | Imputed   |
| rs139241625 | 10:18350702_G/A              | 0.023 | 0.637 | 1.001 | 0.684 | 1.464 | 0.996 | 0.781 | Imputed   |
| rs1277841   | 10:18642068_C/A              | 0.353 | 0.137 | 1.000 | 0.899 | 1.113 | 0.997 | 0.957 | Imputed   |
| rs116634220 | 10:18465056_G/A              | 0.003 | 1.000 | 1.002 | 0.385 | 2.608 | 0.997 | 0.828 | Imputed   |
| rs146960878 | 10:18844828_G/A              | 0.178 | 1.000 | 1.000 | 0.875 | 1.142 | 0.998 | 0.969 | Imputed   |
| rs142070607 | 10:18843830_T/C              | 0.177 | 1.000 | 1.000 | 0.875 | 1.143 | 0.998 | 0.970 | Imputed   |
| rs55927700  | 10:18916380_C/T              | 0.181 | 0.347 | 1.000 | 0.868 | 1.151 | 0.998 | 0.857 | Imputed   |
| rs145837946 | 10:18458469_T/C              | 0.003 | 1.000 | 1.001 | 0.380 | 2.636 | 0.999 | 0.934 | Imputed   |
| rs35000700  | 10:18565514_A/AT             | 0.296 | 0.056 | 1.000 | 0.892 | 1.121 | 0.999 | 0.922 | Imputed   |
| rs4573590   | 10:18917292_G/A              | 0.181 | 0.318 | 1.000 | 0.869 | 1.152 | 0.999 | 0.853 | Imputed   |
| rs78700569  | 10:18844232_A/T              | 0.177 | 1.000 | 1.000 | 0.875 | 1.143 | 1.000 | 0.969 | Imputed   |
| rs139144321 | 10:18917771_C/G              | 0.181 | 0.291 | 1.000 | 0.868 | 1.152 | 1.000 | 0.851 | Imputed   |
| rs4628589   | 10:18917385_C/T              | 0.181 | 0.293 | 1.000 | 0.868 | 1.151 | 1.000 | 0.853 | Imputed   |
| rs1757213   | 10:18537594_A/G              | 0.943 | 0.000 | 1.000 | 0.786 | 1.272 | 1.000 | 0.765 | Imputed   |
| 10:18843943 | 10:18843943_CAGTGGGAATGGAG/C | 0.177 | 1.000 | 1.000 | 0.875 | 1.142 | 1.000 | 0.971 | Imputed   |
| rs142768961 | 10:18843943_CAGTGGGAATGGAG/C | 0.177 | 1.000 | 1.000 | 0.875 | 1.142 | 1.000 | 0.971 | Imputed   |
| rs58857018  | 10:18914007_G/C              | 0.186 | 0.917 | 1.000 | 0.877 | 1.140 | 1.000 | 0.973 | Imputed   |

CHR:POS\_REF/ALT: variant chromosome, bp position, reference allele, and alternative (effect) allele. AF: Alternative allele frequency. HWE<sub>p</sub>: Hardy Weinberg equilibrium p-value. OR: odds ratio. OR 95% CI: 95% confidence interval for OR. P: P-value for association; R<sub>sq</sub>: imputation quality r<sup>2</sup> value. Genotyped: genotyped or imputed variant.

SUPPLEMENTARY DATA

**Supplementary Table S4. Association between CACNB2 R476C, S502L, and related phenotypes.** Individuals with the mutations R476C and S502L were matched with non-carriers by age, sex and duration

|                                          | <b>R476C</b> | <b>Matched non-carriers</b> | <b>p-value</b> | <b>S502L</b> | <b>Matched non-carriers</b> | <b>p-value</b> |
|------------------------------------------|--------------|-----------------------------|----------------|--------------|-----------------------------|----------------|
| n                                        | 7            | 28                          |                | 15           | 60                          |                |
| Sex (men %)                              | 3 (43%)      | 12 (43%)                    | NA             | 5 (33%)      | 20 (33%)                    | NA             |
| Age (years)                              | 41.8         | 41.8                        | NA             | 36.4         | 36.4                        | NA             |
| Duration (years)                         | 26.0         | 25.9                        | NA             | 18.8         | 18.8                        | NA             |
| Age at onset of diabetes (years)         | 15.8         | 15.6                        | NS             | 17.6         | 18.1                        | NS             |
| HbA <sub>1c</sub> (mmol/mol)             | 70           | 72                          | NS             | 72           | 73                          | NS             |
| HbA <sub>1c</sub> (%)                    | 8.6          | 8.7                         | NS             | 8.7          | 8.8                         | NS             |
| Systolic BP (mmHg)                       | 139.4        | 141.0                       | NS             | 128.1        | 133.7                       | NS             |
| Diastolic BP (mmHg)                      | 81.2         | 79.4                        | NS             | 79.9         | 80.3                        | NS             |
| MAP (mmHg)                               | 100.6        | 100.0                       | NS             | 96.0         | 98.1                        | NS             |
| PP (mmHg)                                | 58.2         | 61.5                        | NS             | 48.1         | 53.4                        | NS             |
| BMI (kg/m <sup>2</sup> )                 | 26.0         | 24.7                        | NS             | 25.6         | 24.8                        | NS             |
| WHR                                      | 0.91         | 0.86                        | NS             | 0.84         | 0.84                        | NS             |
| Total cholesterol (mmol/l)               | 4.99         | 5.07                        | NS             | 5.41         | 4.79                        | 0.047          |
| HDL-cholesterol (mmol/l)                 | 1.55         | 1.64                        | NS             | 1.68         | 1.56                        | NS             |
| Triacylglycerol (mmol/l)                 | 1.23         | 1.38                        | NS             | 1.10         | 1.13                        | NS             |
| Laser-treatment                          | 2 (29%)      | 17 (61%)                    | NS             | 3 (20%)      | 17 (28%)                    | NS             |
| Any retinopathy                          | 5 (71%)      | 22 (79%)                    | NS             | 7 (47%)      | 25 (42%)                    | NS             |
| PDR (ETDRS>61)                           | 2 (29%)      |                             | *              | 5 (33%)      |                             | *              |
| Mean duration of diabetes to PDR (years) | 15.8         | 21 (others)                 | *              | 16.7         | 21 (others)                 | *              |

Data are means ( $\pm$ SD) or medians (range). NA: p-value not calculated for the variants used for matching controls. NS: p-value > 0.05.

\*The p-value was not calculated because of a small number of individuals with ETDRS classification available

SUPPLEMENTARY DATA

**Supplementary Table S5: Physicians and nurses at health care centres participating in the collection of FinnDiane patients**

| <b>FinnDiane Study Centers</b>                                                       | <b>Physicians and nurses</b>                                                                                                                                                                                                                                 |
|--------------------------------------------------------------------------------------|--------------------------------------------------------------------------------------------------------------------------------------------------------------------------------------------------------------------------------------------------------------|
| Anjalankoski Health Centre                                                           | S. Koivula, T. Uggeldahl                                                                                                                                                                                                                                     |
| Central Finland Central Hospital, Jyväskylä                                          | T. Forslund, A. Halonen, A. Koistinen, P. Koskiahio, M. Laukkanen, J. Saltevo, M. Tiihonen                                                                                                                                                                   |
| Central Hospital of Åland Islands, Mariehamn                                         | M. Forsen, H. Granlund, A-C. Jonsson, B. Nyroos                                                                                                                                                                                                              |
| Central Hospital of Kanta-Häme, Hämeenlinna                                          | P. Kinnunen, A. Orvola, T. Salonen, A. Vähänen                                                                                                                                                                                                               |
| Central Hospital of Länsi-Pohja, Kemi                                                | H. Laukkanen, P. Nyländer, A. Sademies                                                                                                                                                                                                                       |
| Central Ostrabothnian Hospital District, Kokkola                                     | S. Anderson, B. Asplund, U. Byskata, P. Liedes, M. Kuusela, T. Virkkala                                                                                                                                                                                      |
| City of Espoo Health Centre                                                          |                                                                                                                                                                                                                                                              |
| Espoonlahti                                                                          | A. Nikkola, E. Ritola                                                                                                                                                                                                                                        |
| Tapiola                                                                              | M. Niska, H. Saarinen                                                                                                                                                                                                                                        |
| Samaria                                                                              | E. Oukko-Ruponen, T. Virtanen                                                                                                                                                                                                                                |
| Viherlaakso                                                                          | A. Lyytinen                                                                                                                                                                                                                                                  |
| City of Helsinki Health Centre                                                       |                                                                                                                                                                                                                                                              |
| Puistola                                                                             | H. Kari, T. Simonen                                                                                                                                                                                                                                          |
| Suutarila                                                                            | A. Kaprio, J. Kärkkäinen, B. Rantaeskola                                                                                                                                                                                                                     |
| Töölö                                                                                | P. Kääriäinen, J. Haaga, A-L. Pietiläinen                                                                                                                                                                                                                    |
| City of Hyvinkää Health Centre                                                       | S. Klemetti, T. Nyandoto, E. Rontu, S. Satuli-Autere                                                                                                                                                                                                         |
| City of Vantaa Health Centre                                                         |                                                                                                                                                                                                                                                              |
| Korso                                                                                | R. Toivonen, H. Virtanen                                                                                                                                                                                                                                     |
| Länsimäki                                                                            | R. Ahonen, M. Ivaska-Suomela, A. Jauhiainen                                                                                                                                                                                                                  |
| Martinlaakso                                                                         | M. Laine, T. Pellonpää, R. Puranen                                                                                                                                                                                                                           |
| Myyrmäki                                                                             | A. Airas, J. Laakso, K. Rautavaara                                                                                                                                                                                                                           |
| Rekola                                                                               | M. Erola, E. Jatkola                                                                                                                                                                                                                                         |
| Tikkurila                                                                            | R. Lönnblad, A. Malm, J. Mäkelä, E. Rautamo                                                                                                                                                                                                                  |
| Heinola Health Centre                                                                | P. Hentunen, J. Lagerstam                                                                                                                                                                                                                                    |
| Helsinki University Central Hospital, Department of Medicine, Division of Nephrology | A. Ahola, J. Fagerudd, M. Feodoroff, D. Gordin, O. Heikkilä, K Hietala, L. Kyllönen, J. Kytö, S. Lindh, K. Pettersson-Fernholm, M. Rosengård-Bärlund, M. Rönnback, A. Sandelin, A-R Salonen, L. Salovaara, L. Thorn, J. Tuomikangas, T. Vesisenaho, J. Wadén |
| Herttoniemi Hospital, Helsinki                                                       | V. Sipilä                                                                                                                                                                                                                                                    |
| Hospital of Lounais-Häme, Forssa                                                     | T. Kalliomäki, J. Koskelainen, R. Nikkanen, N. Savolainen, H. Sulonen, E. Valtonen                                                                                                                                                                           |
| Iisalmi Hospital                                                                     | E. Toivanen                                                                                                                                                                                                                                                  |
| Jokilaakso Hospital, Jämsä                                                           | A. Parta, I. Pirttiniemi                                                                                                                                                                                                                                     |
| Jorvi Hospital, Helsinki University Central Hospital                                 | S. Aranko, S. Ervasti, R. Kauppinen-Mäkelin, A. Kuusisto, T. Leppälä, K. Nikkilä, L. Pekkonen                                                                                                                                                                |
| Jyväskylä Health Centre, Kyllö                                                       | K. Nuorva, M. Tiihonen                                                                                                                                                                                                                                       |
| Kainuu Central Hospital, Kajaani                                                     | S. Jokelainen, P. Kempainen, A-M. Mankinen, M. Sankari                                                                                                                                                                                                       |
| Kerava Health Centre                                                                 | H. Stuckey, P. Suominen                                                                                                                                                                                                                                      |
| Kirkkonummi Health Centre                                                            | A. Lappalainen, M. Liimatainen, J. Santaholma                                                                                                                                                                                                                |
| Kivelä Hospital, Helsinki                                                            | A. Aimolahti, E. Huovinen                                                                                                                                                                                                                                    |
| Koskela Hospital, Helsinki                                                           | V. Ilkka, M. Lehtimäki                                                                                                                                                                                                                                       |
| Kotka Health Centre                                                                  | E. Pälikkö-Kontinen, A. Vanhanen                                                                                                                                                                                                                             |
| Kouvola Health Centre                                                                | E. Koskinen, T. Siitonen                                                                                                                                                                                                                                     |
| Kuopio University Hospital                                                           | E. Huttunen, R. Ikäheimo, P. Karhapää, P. Kekäläinen, M. Laakso, T. Lakka, E. Lampainen, L. Moilanen, L. Niskanen, U. Tuovinen, I. Vauhkonen, E. Voutilainen                                                                                                 |

## SUPPLEMENTARY DATA

| <b>FinnDiane Study Centers</b>               | <b>Physicians and nurses</b>                                                                                                       |
|----------------------------------------------|------------------------------------------------------------------------------------------------------------------------------------|
| Kuusamo Health Centre                        | T. Kääriäinen, E. Isopoussu                                                                                                        |
| Kuusankoski Hospital                         | E. Kilkki, I. Koskinen, L. Riihelä                                                                                                 |
| Laakso Hospital, Helsinki                    | T. Meriläinen, P. Poukka, R. Savolainen, N. Uhlenius                                                                               |
| Lahti City Hospital                          | A. Mäkelä, M. Tanner                                                                                                               |
| Lapland Central Hospital, Rovaniemi          | L. Hyvärinen, S. Severinkangas, T. Tulokas                                                                                         |
| Lappeenranta Health Centre                   | P. Linkola, I. Pulli                                                                                                               |
| Lohja Hospital                               | T. Granlund, M. Saari, T. Salonen                                                                                                  |
| Loimaa Health Centre                         | A. Mäkelä, P. Eloranta                                                                                                             |
| Länsi-Uusimaa Hospital, Tammissaari          | I-M. Jousmaa, J. Rinne                                                                                                             |
| Malmi Hospital, Helsinki                     | H. Lanki, S. Moilanen, M. Tilly-Kiesi                                                                                              |
| Mikkeli Central Hospital                     | A. Gynther, R. Manninen, P. Nironen, M. Salminen, T. Vanttinen                                                                     |
| Mänttä Regional Hospital                     | I. Pirttiniemi, A-M. Hänninen                                                                                                      |
| North Karelian Hospital, Joensuu             | U-M. Henttula, P. Kekäläinen, M. Pietarinen, A. Rissanen, M. Voutilainen                                                           |
| Nurmijärvi Health Centre                     | A. Burgos, K. Urtamo                                                                                                               |
| Oulankangas Hospital, Oulainen               | E. Jokelainen, P-L. Jylkkä, E. Kaarlela, J. Vuolaspuro                                                                             |
| Oulu Health Centre                           | L. Hiltunen, R. Häkkinen, S. Keinänen-Kiukaanniemi                                                                                 |
| Oulu University Hospital                     | R. Ikäheimo                                                                                                                        |
| Päijät-Häme Central Hospital                 | H. Haapamäki, A. Helanterä, S. Hämäläinen, V. Ilvesmäki, H. Miettinen                                                              |
| Palokka Health Centre                        | P. Sopanen, L. Welling                                                                                                             |
| Pieksämäki Hospital                          | V. Javtsenko, M. Tamminen                                                                                                          |
| Pietarsaari Hospital                         | M-L. Holmbäck, B. Isomaa, L. Sarelin                                                                                               |
| Pori City Hospital                           | P. Ahonen, P. Merensalo, K. Sävelä                                                                                                 |
| Porvoo Hospital                              | M. Kallio, B. Rask, S. Rämö                                                                                                        |
| Raahe Hospital                               | A. Holma, M. Honkala, A. Tuomivaara, R. Vainionpää                                                                                 |
| Rauma Hospital                               | K. Laine, K. Saarinen, T. Salminen                                                                                                 |
| Riihimäki Hospital                           | P. Aalto, E. Immonen, L. Juurinen                                                                                                  |
| Salo Hospital                                | A. Alanko, J. Lapinleimu, P. Rautio, M. Virtanen                                                                                   |
| Satakunta Central Hospital, Pori             | M. Asola, M. Juhola, P. Kunelius, M-L. Lahdenmäki, P. Pääkkönen, M. Rautavirta                                                     |
| Savonlinna Central Hospital                  | E. Korpi-Hyövälti, T. Latvala, E. Leijala                                                                                          |
| South Karelia Central Hospital, Lappeenranta | T. Ensala, E. Hussi, R. Härkönen, U. Nyholm, J. Toivanen                                                                           |
| Tampere Health Centre                        | A. Vaden, P. Alarotu, E. Kujansuu, H. Kirkkopelto-Jokinen, M. Helin, S. Gummerus, L. Calonius, T. Niskanen, T. Kaitala, T. Vatanen |
| Tampere University Hospital                  | I. Ala-Houhala, T. Kuningas, P. Lampinen, M. Määttä, H. Oksala, T. Oksanen, K. Salonen, H. Tauriainen, S. Tulokas                  |
| Tiirismaa Health Centre, Hollola             | T. Kivelä, L. Petlin, L. Savolainen                                                                                                |
| Turku Health Centre                          | I. Hämäläinen, H. Virtamo, M. Vähätalo                                                                                             |
| Turku University Central Hospital            | K. Breitholz, R. Eskola, K. Metsärinne, U. Pietilä, P. Saarinen, R. Tuominen, S. Äyräpää                                           |
| Vaajakoski Health Centre                     | K. Mäkinen, P. Sopanen                                                                                                             |
| Valkeakoski Regional Hospital                | S. Ojanen, E. Valtonen, H. Ylönen, M. Rautiainen, T. Immonen                                                                       |
| Vammala Regional Hospital                    | I. Isomäki, R. Kroneld, M. Tapiolinna-Mäkelä                                                                                       |
| Vaasa Central Hospital                       | S. Bergkulla, U. Hautamäki, V-A. Myllyniemi, I. Rusk                                                                               |
